# Supplementary material for: T Cell Transcriptomes Describe Patient Subtypes in Systemic Lupus Erythematosus
Source: PLoS One. 2015 Nov 6;10(11):e0141171. doi: 10.1371/journal.pone.0141171 (PMC4636226; doi:10.1371/journal.pone.0141171)
Supplement: S2 Table — (XLS) [file pone.0141171.s004.xls]

## Sheet: DAVID analysis
	Supplemental DAVID results (52 Kegg and Interpro terms indexed as in Figure 6)
	These are the expanded results of DAVID analysis of the control+mild (T0+A) versus severe (B+C) expression phenotype T cell samples (refined analysis).
	DAVID results were copied into Excel for formatting, including unwrapping text, left justification and ranking by gene count.
	Note that related gene and related term hyperlinks are only active during a DAVID session for the active gene list (no background list applied, used whole genome)
	Genes were enumerated only for terms that were most specific and non-redundant, for which the term identifier is in bold (for instance pyrimidine metabolism genes were redundant to purine metabolism, and was not significant)
	For these genes we performed a join at the Galaxy server online to obtain Gene Expression Data, including the median normalized transformed data, from GED_ALL.xls.
	Genes and Terms with increased expression are presented first, followed by those related to reduced expression farther down the sheet (Orange and Blue ENSG IDs)
	Use of the transport keys (such as holding Ctrl while using a directional key) is recommended for examination of large sheets.
	KEGG and INTERPRO DAVID result for expression increased 1.5x or more in SLE T cells (control+mild versus severe expression phenotype, Con+0+Af versus B+C comparison)
	Category	Term	Genes	Count	%	P-Value	Benjamini
	KEGG_PATHWAY	Huntington's disease		39	3.3	9.5e-08	3.4e-06	These terms are not specific and genes related are no longer accessible
1	KEGG_PATHWAY	Oxidative phosphorylation		37	3.2	8.2e-11	1.5e-08
	KEGG_PATHWAY	Alzheimer's disease		37	3.2	6.3e-08	2.8e-06	These terms are not specific and genes related are no longer accessible
	KEGG_PATHWAY	Parkinson's disease		34	2.9	3.9e-09	3.5e-07	These terms are not specific and genes related are no longer accessible
2	KEGG_PATHWAY	Purine metabolism		27	2.3	0.00049	0.011
3	KEGG_PATHWAY	Lysosome		26	2.2	1.3e-05	0.00038
4	KEGG_PATHWAY	Proteasome		19	1.6	2e-08	1.2e-06
5	KEGG_PATHWAY	Natural killer cell mediated cytotoxicity		19	1.6	0.034	0.23
6	KEGG_PATHWAY	Antigen processing and presentation		16	1.4	0.0041	0.045
7	KEGG_PATHWAY	Glycolysis / Gluconeogenesis		14	1.2	0.0014	0.027
8	KEGG_PATHWAY	DNA replication		13	1.1	2.5e-05	0.00064
9	KEGG_PATHWAY	Glutathione metabolism		12	1	0.0028	0.041
10	KEGG_PATHWAY	N-Glycan biosynthesis		11	0.9	0.0047	0.048
11	KEGG_PATHWAY	Aminoacyl-tRNA biosynthesis		11	0.9	0.0019	0.034
12	KEGG_PATHWAY	Pyruvate metabolism		9	0.8	0.018	0.16
13	KEGG_PATHWAY	Fatty acid metabolism		9	0.8	0.018	0.16
14	KEGG_PATHWAY	Citrate cycle (TCA cycle)		9	0.8	0.0037	0.046
15	KEGG_PATHWAY	Pentose phosphate pathway		8	0.7	0.004	0.046
16	KEGG_PATHWAY	Mismatch repair		8	0.7	0.0024	0.038
17	KEGG_PATHWAY	Fatty acid elongation in mitochondria		5	0.4	0.0028	0.038
								Median Normalized Data for Gene-e Clustering.
1	Oxidative Phosphorylation	GENE NAME	Symbol	avgCON	avgAFF	log(a/c)	ENSG	N048	N068	N090	N098	L005	L137	L101	L062	L149	L140	L031	L072	L133	L074	L078	L102	L115	L027	pureENSG	gene	avgCON	avgAFF	log(a/c)	CV	N048	N068	N090	N098	L005	L137	L101	L062	L149	L140	L031	L072	L133	L074	L078	L102	L115	L027
1	ENSG00000116459	ATP synthase, H+ transporting, mitochondrial F0 complex, subunit B1	ATP5F1	109	157	0.5	ENSG00000116459	-0.801	0.126	-0.903	-0.704	0.08	-0.504	-0.163	-0.304	-0.24	-1.077	0.308	-0.08	1.111	1.187	1.044	0.645	1.272	0.737	ENSG00000116459	ATP5F1	109	157	0.5	0.3	95	150	89	101	147	113	133	124	128	79	160	137	207	212	204	180	217	185
1	ENSG00000159199	ATP synthase, H+ transporting, mitochondrial F0 complex, subunit C1 (subunit 9)	ATP5G1	55	77	0.5	ENSG00000159199	-0.801	0.005	-1.508	-1.279	-0.866	0.229	-0.005	-0.055	-0.642	-0.707	0.991	0.602	1.697	1.025	-0.189	0.219	1.279	0.05	ENSG00000159199	ATP5G1	55	77	0.5	0.2	57	73	43	47	56	78	73	72	60	59	93	85	107	94	69	77	99	74
1	ENSG00000135390	ATP synthase, H+ transporting, mitochondrial F0 complex, subunit C2 (subunit 9)	ATP5G2	318	409	0.4	ENSG00000135390	-0.852	-0.089	-1.186	-1.539	-0.481	0.238	0.104	-1.131	-1.491	-1.51	1.092	-0.202	0.089	0.497	0.137	0.466	2.085	0.942	ENSG00000135390	ATP5G2	318	409	0.4	0.2	324	398	292	258	360	430	417	298	263	261	512	387	415	455	420	452	608	498
1	ENSG00000154518	ATP synthase, H+ transporting, mitochondrial F0 complex, subunit C3 (subunit 9)	ATP5G3	92	127	0.5	ENSG00000154518	-0.075	-0.723	-1.134	-1.16	-0.267	0.163	0.176	-0.486	-0.834	-1.202	1.219	0.57	2.907	0.867	0.626	0.075	1.834	-0.173	ENSG00000154518	ATP5G3	92	127	0.5	0.3	114	94	81	81	108	121	122	101	91	79	154	134	205	143	135	118	172	111
1	ENSG00000154723	ATP synthase, H+ transporting, mitochondrial F0 complex, subunit F6	ATP5J	62	96	0.6	ENSG00000154723	-0.638	-0.477	-1.607	-1.296	-0.879	0.389	0.404	-0.623	-0.96	-1.216	1.632	0.532	2.005	0.711	-0.009	0.009	2.027	0.218	ENSG00000154723	ATP5J	62	96	0.6	0.3	72	76	45	54	65	100	100	72	63	56	134	104	144	109	89	89	145	95
1	ENSG00000167863	ATP synthase, H+ transporting, mitochondrial F0 complex, subunit d	ATP5H	111	164	0.6	ENSG00000167863	-1.613	0.115	-1.714	-1.403	-0.966	-0.047	0.145	-0.325	-0.666	-1.464	0.585	0.011	0.625	1.441	0.683	-0.011	2.085	1.439	ENSG00000167863	ATP5H	111	164	0.6	0.3	93	162	89	102	119	155	163	144	131	99	180	158	182	214	184	157	240	214
1	ENSG00000124172	ATP synthase, H+ transporting, mitochondrial F1 complex, epsilon subunit pseudogene 2; ATP synthase, H+ transporting, mitochondrial F1 complex, epsilon subunit	ATP5E	107	154	0.5	ENSG00000124172	-0.777	-0.27	-1.249	-1.067	-0.365	0.033	0.436	-0.498	-1.339	-0.993	1.228	-0.031	0.885	0.572	1.431	0.16	2.407	0.031	ENSG00000124172	ATP5E	107	154	0.5	0.3	110	132	89	97	128	145	163	122	86	101	197	142	182	169	206	151	248	145
1	ENSG00000165629	ATP synthase, H+ transporting, mitochondrial F1 complex, gamma polypeptide 1	ATP5C1	68	98	0.5	ENSG00000165629	-1.085	-0.385	-1.391	-1.077	-1.098	-0.063	-0.08	0.084	0.063	-0.796	0.746	-0.126	2.522	1.349	0.603	0.18	1.081	0.276	ENSG00000165629	ATP5C1	68	98	0.5	0.2	65	82	58	65	65	90	89	93	93	72	109	88	151	123	106	95	117	98
1	ENSG00000171130	ATPase, H+ transporting V0 subunit e2	ATP6V0E2	36	56	0.6	ENSG00000171130	-1.806	0.742	-1.688	-2.61	-0.591	-0.44	0.147	0.415	-0.775	-0.256	-0.323	1.035	-0.147	0.591	1.998	1.387	0.607	0.817	ENSG00000171130	ATP6V0E2	36	56	0.6	0.3	30	61	32	21	45	47	54	57	43	49	48	64	50	59	76	69	59	62
1	ENSG00000128524	ATPase, H+ transporting, lysosomal 14kDa, V1 subunit F	ATP6V1F	70	94	0.4	ENSG00000128524	-0.537	-0.093	-2.231	-1.688	-0.73	-0.415	0.555	-0.245	-1.004	-1.507	1.694	0.099	1.682	1.413	0.374	0.093	2.564	0.619	ENSG00000128524	ATP6V1F	70	94	0.4	0.2	80	88	51	60	77	82	99	85	72	63	118	91	118	113	96	91	133	100
1	ENSG00000117410	ATPase, H+ transporting, lysosomal 21kDa, V0 subunit b	ATP6V0B	41	50	0.3	ENSG00000117410	0.012	-0.012	-1.046	-0.699	-0.521	-0.683	-0.691	0.666	0.117	-0.885	0.335	0.497	2.137	1.2	1.434	-0.141	1.288	-0.359	ENSG00000117410	ATP6V0B	41	50	0.3	0.2	47	46	33	38	40	38	38	55	48	35	51	53	73	61	64	45	62	42
1	ENSG00000100554	ATPase, H+ transporting, lysosomal 34kDa, V1 subunit D	ATP6V1D	8	18	1.1	ENSG00000100554	-0.787	-0.198	-1.087	-0.862	-0.669	-0.894	-0.68	-0.07	0.476	-0.562	0.07	0.273	1.076	1.044	1.965	0.252	1.376	0.519	ENSG00000100554	ATP6V1D	8	18	1.1	0.5	8	13	5	7	9	7	9	14	19	10	16	18	25	25	33	17	28	20
1	ENSG00000159720	ATPase, H+ transporting, lysosomal 38kDa, V0 subunit d1	ATP6V0D1	31	35	0.2	ENSG00000159720	0.521	-0.674	-0.889	0.031	0.429	-1.395	-0.674	-0.782	0.245	-1.257	-0.031	-0.215	3.219	1.349	3.94	0.414	0.797	-0.337	ENSG00000159720	ATP6V0D1	31	35	0.2	0.3	36	28	26	32	35	23	28	27	34	24	32	31	53	41	58	35	37	30
1	ENSG00000113732	ATPase, H+ transporting, lysosomal 9kDa, V0 subunit e1	ATP6V0E1	132	216	0.7	ENSG00000113732	-1.099	0.046	-1.032	-0.994	-0.416	-0.704	0.109	-0.179	-0.263	-0.743	0.645	0.14	-0.046	0.956	0.714	0.155	1.631	0.748	ENSG00000113732	ATP6V0E1	132	216	0.7	0.3	101	207	107	111	165	138	213	187	179	134	263	216	199	292	269	218	355	273
1	ENSG00000131495	NADH dehydrogenase (ubiquinone) 1 alpha subcomplex, 2, 8kDa	NDUFA2	21	29	0.5	ENSG00000131495	-0.76	-0.636	-1.69	-1.178	-0.605	0	0.651	-0.512	-1.116	-1.271	1.209	0.124	2.434	0.698	0.031	0	2.171	0.078	ENSG00000131495	NDUFA2	21	29	0.5	0.3	23	24	17	20	24	28	32	24	20	19	35	28	43	32	28	28	42	28
1	ENSG00000119421	NADH dehydrogenase (ubiquinone) 1 alpha subcomplex, 8, 19kDa	NDUFA8	12	18	0.6	ENSG00000119421	-1.012	0.304	-1.332	-0.961	-0.304	-0.658	-0.455	0.051	-0.051	-1.147	-0.219	0.607	2.226	1.787	0.691	0.658	0.759	1.551	ENSG00000119421	NDUFA8	12	18	0.6	0.4	10	18	8	10	14	12	13	16	16	9	15	20	29	27	20	20	21	25
1	ENSG00000183648	NADH dehydrogenase (ubiquinone) 1 beta subcomplex, 1, 7kDa	NDUFB1	80	108	0.4	ENSG00000183648	-0.968	0.009	-1.287	-1.545	-0.402	-0.508	0.469	0.034	-0.933	-1.871	0.784	0.455	1.245	0.65	-0.653	-0.009	1.655	0.696	ENSG00000183648	NDUFB1	80	108	0.4	0.3	80	107	71	63	96	93	120	108	81	54	129	120	142	125	89	107	154	127
1	ENSG00000140990	NADH dehydrogenase (ubiquinone) 1 beta subcomplex, 10, 22kDa	NDUFB10	56	83	0.6	ENSG00000140990	-0.813	-0.173	-1.323	-1.198	-0.575	0.009	0.29	-0.45	-0.009	-1.016	1.695	0.549	1.224	0.882	0.83	-0.03	0.774	0.294	ENSG00000140990	NDUFB10	56	83	0.6	0.2	58	73	46	49	63	77	83	66	76	53	116	89	105	97	96	76	94	83
1	ENSG00000090266	NADH dehydrogenase (ubiquinone) 1 beta subcomplex, 2, 8kDa	NDUFB2	71	105	0.6	ENSG00000090266	-0.746	-0.483	-1.747	-1.554	-0.874	0.189	0.518	-0.526	-0.846	-1.171	1.133	-0.108	0.796	0.603	0.108	0.193	2.965	0.472	ENSG00000090266	NDUFB2	71	105	0.6	0.3	81	88	55	60	78	105	114	87	78	70	130	98	121	116	103	105	177	113
1	ENSG00000119013	NADH dehydrogenase (ubiquinone) 1 beta subcomplex, 3, 12kDa	NDUFB3	26	45	0.8	ENSG00000119013	-0.906	0.077	-1.012	-0.932	-0.741	-0.507	-0.077	-0.215	-0.199	-0.852	0.332	0.289	2.042	1.208	0.608	0.481	1.553	0.81	ENSG00000119013	NDUFB3	26	45	0.8	0.4	22	40	20	21	25	29	38	35	35	23	45	44	77	62	50	48	68	54
1	ENSG00000136521	NADH dehydrogenase (ubiquinone) 1 beta subcomplex, 5, 16kDa	NDUFB5	27	46	0.8	ENSG00000136521	-1.013	-0.103	-0.916	-1.138	-0.401	-0.141	0.103	-0.157	-0.368	-0.807	0.742	0.114	1.051	1.089	0.119	0.607	1.609	0.861	ENSG00000136521	NDUFB5	27	46	0.8	0.3	23	40	25	20	34	39	43	39	35	27	55	44	61	62	44	53	71	57
1	ENSG00000165264	NADH dehydrogenase (ubiquinone) 1 beta subcomplex, 6, 17kDa	NDUFB6	12	18	0.6	ENSG00000165264	-0.056	-0.146	-1.293	-0.528	-0.281	-0.101	0.056	-0.416	-0.304	-0.978	0.911	0.641	4.328	2.574	0.708	0.888	3.429	1.18	ENSG00000165264	NDUFB6	12	18	0.6	0.4	14	14	9	12	13	14	15	13	13	10	19	17	34	26	18	18	30	20
1	ENSG00000145494	NADH dehydrogenase (ubiquinone) Fe-S protein 6, 13kDa (NADH-coenzyme Q reductase)	NDUFS6	23	34	0.6	ENSG00000145494	-0.681	0.279	-1.576	-0.914	-1.304	-0.045	-0.162	-0.24	0.032	-0.097	1.615	0.136	4.105	1.317	1.291	-0.032	3.184	0.668	ENSG00000145494	NDUFS6	23	34	0.6	0.3	23	30	16	21	18	28	27	26	29	28	41	29	60	38	38	28	53	33
1	ENSG00000115286	NADH dehydrogenase (ubiquinone) Fe-S protein 7, 20kDa (NADH-coenzyme Q reductase)	NDUFS7	35	51	0.5	ENSG00000115286	-1.134	0.6	-1.911	-1.237	-1.714	-0.309	-0.403	-0.112	-0.356	0.506	0.749	0.084	2.473	1.143	0.899	-0.084	3.597	0.328	ENSG00000115286	NDUFS7	35	51	0.5	0.3	33	52	25	32	27	42	41	44	41	51	53	46	72	57	55	44	84	49
1	ENSG00000176340	cytochrome c oxidase subunit 8A (ubiquitous)	COX8A	168	222	0.4	ENSG00000176340	0.031	-0.948	-1.07	-0.704	-0.242	-0.02	0.361	-0.828	-0.728	-0.883	1.371	0.02	2.342	0.515	0.645	0.022	1.495	-0.272	ENSG00000176340	COX8A	168	222	0.4	0.3	210	152	145	166	194	207	229	159	165	156	288	209	345	238	246	209	296	192
1	ENSG00000115944	cytochrome c oxidase subunit VIIa polypeptide 2 like	COX7A2L	66	89	0.4	ENSG00000115944	-0.975	0.193	-1.349	-1.247	-0.354	-0.047	0.181	-0.283	-1.062	-1.526	1.007	-0.11	0.381	0.802	0.047	0.893	1.542	0.547	ENSG00000115944	COX7A2L	66	89	0.4	0.3	62	92	53	55	78	86	92	80	60	48	113	84	97	107	88	110	126	101
1	ENSG00000111775	cytochrome c oxidase subunit VIa polypeptide 1	COX6A1	148	206	0.5	ENSG00000111775	-0.076	-0.886	-1.345	-0.893	-0.285	0.283	0.622	-0.594	-0.727	-1.198	1.472	0.098	2.285	1.007	0.45	-0.358	2.459	0.076	ENSG00000111775	COX6A1	148	206	0.5	0.3	185	144	120	143	174	203	221	158	152	128	264	194	306	240	212	171	315	193
1	ENSG00000178741	cytochrome c oxidase subunit Va	COX5A	79	143	0.9	ENSG00000178741	-1.15	-0.688	-1.504	-1.086	-0.521	-0.449	0.167	-0.466	0.061	-0.97	1.529	-0.057	2.012	1.156	0.661	0.085	1.127	0.057	ENSG00000178741	COX5A	79	143	0.9	0.3	77	99	60	80	107	110	139	109	134	85	203	129	226	186	162	135	184	134
1	ENSG00000179091	cytochrome c-1	CYC1	35	49	0.5	ENSG00000179091	-0.642	-0.545	-1.484	-1.128	-1.16	-0.707	0.005	-0.049	0.308	-0.005	1.743	0.502	4.171	1.117	0.761	-0.135	1.937	0.07	ENSG00000179091	CYC1	35	49	0.5	0.3	37	38	30	33	33	37	43	43	46	43	60	48	82	54	50	42	61	44
1	ENSG00000180817	pyrophosphatase (inorganic) 1	PPA1	64	96	0.6	ENSG00000180817	-1.369	-0.65	-0.565	-1.53	0.699	-0.095	0.203	-1.176	-0.851	-1.392	0.557	0.091	0.266	0.505	-0.091	1.004	0.93	2.104	ENSG00000180817	PPA1	64	96	0.6	0.3	55	74	77	51	111	89	97	60	69	54	107	94	99	105	89	119	117	148
1	ENSG00000138777	pyrophosphatase (inorganic) 2	PPA2	32	41	0.4	ENSG00000138777	-0.588	-0.53	-0.922	-0.865	-0.415	-0.83	0.6	-0.427	0.058	-0.496	1.522	-0.058	0.738	0.784	0.611	0.749	1.706	1.522	ENSG00000138777	PPA2	32	41	0.4	0.2	33	33	30	30	34	31	43	34	38	34	51	37	44	45	43	44	53	51
1	ENSG00000204370	similar to succinate dehydrogenase complex, subunit D, integral membrane protein; succinate dehydrogenase complex, subunit D, integral membrane protein	SDHD	42	55	0.4	ENSG00000204370	-1.199	0.017	-0.698	-0.651	-0.017	-0.918	0.444	-0.217	-0.21	-1.212	0.918	-0.144	0.204	1.66	0.985	0.738	0.618	1.539	ENSG00000204370	SDHD	42	55	0.4	0.2	34	52	41	42	52	38	58	49	49	34	66	50	55	77	67	63	61	75
1	ENSG00000143252	succinate dehydrogenase complex, subunit C, integral membrane protein, 15kDa	SDHC	49	62	0.3	ENSG00000143252	-0.902	-0.126	-1.132	-1.097	-0.608	-0.986	0.685	-0.391	-0.475	-1.16	1.482	0.126	0.601	1.23	0.762	0.664	0.377	0.496	ENSG00000143252	SDHC	49	62	0.3	0.2	48	59	45	45	52	47	71	55	54	44	82	63	69	78	72	70	66	68
1	ENSG00000184076	ubiquinol-cytochrome c reductase complex (7.2 kD)	UQCR10	46	68	0.6	ENSG00000184076	-0.794	-0.501	-1.741	-1.093	-0.583	-0.051	0.051	-0.514	-0.732	-0.726	1.066	0.174	1.993	1.114	0.535	0.412	3.069	0.623	ENSG00000184076	UQCR10	46	68	0.6	0.3	50	54	36	45	53	61	62	54	51	51	77	64	91	78	69	67	106	71
1	ENSG00000010256	ubiquinol-cytochrome c reductase core protein I	UQCRC1	50	75	0.6	ENSG00000010256	-0.857	-0.207	-1.089	-1.151	-0.764	-0.634	-0.038	0.038	0.403	-0.715	1.289	0.265	1.765	1.066	1.436	-0.091	0.354	0.238	ENSG00000010256	UQCRC1	50	75	0.6	0.3	49	64	44	42	51	54	67	69	77	52	97	74	108	92	101	66	76	74
1	ENSG00000173660	ubiquinol-cytochrome c reductase hinge protein-like; ubiquinol-cytochrome c reductase hinge protein	UQCRH	150	218	0.5	ENSG00000173660	-0.485	-0.264	-1.493	-1.09	-0.328	0.423	0.387	-0.531	-1.247	-1.137	1.549	0.313	1.708	0.978	-0.17	0.818	2.138	0.17	ENSG00000173660	UQCRH	150	218	0.5	0.3	171	184	111	135	180	225	223	168	126	132	291	218	301	258	190	248	326	210
1	ENSG00000164405	ubiquinol-cytochrome c reductase, complex III subunit VII, 9.5kDa	UQCRQ	71	95	0.4	ENSG00000164405	0.454	-0.672	-1.586	-0.846	-0.532	0.324	0.575	-0.774	-0.677	-0.933	1.799	0.609	3.133	0.89	-0.058	0.058	2.872	-0.276	ENSG00000164405	UQCRQ	71	95	0.4	0.3	94	71	52	67	74	92	97	69	71	66	122	98	150	103	84	86	144	79
2	Purine Metabolism	GENE NAME	Symbol	avgCON	avgAFF	log(a/c)	ENSG	N048	N068	N090	N098	L005	L137	L101	L062	L149	L140	L031	L072	L133	L074	L078	L102	L115	L027	pureENSG	gene	avgCON	avgAFF	log(a/c)	CV	N048	N068	N090	N098	L005	L137	L101	L062	L149	L140	L031	L072	L133	L074	L078	L102	L115	L027
2	ENSG00000138801	3'-phosphoadenosine 5'-phosphosulfate synthase 1	PAPSS1	8	12	0.6	ENSG00000138801	-1.51	-0.132	-0.894	-1.305	-0.455	-0.777	0.103	-0.572	0.572	-1.569	0.425	0.073	2.185	0.982	1.833	1.1	-0.073	0.396	ENSG00000138801	PAPSS1	8	12	0.6	0.3	6	11	8	7	10	9	12	10	13	6	13	12	19	15	18	15	11	13
2	ENSG00000122643	5'-nucleotidase, cytosolic III	NT5C3A	24	42	0.8	ENSG00000122643	-1.217	-1.068	-1.043	-1.175	-0.621	0.066	-0.066	0.521	0.943	-0.397	1.539	-0.521	2.011	1.746	0.43	-0.472	0.505	0.728	ENSG00000122643	NT5C3A	24	42	0.8	0.3	23	25	25	23	30	38	37	44	49	33	56	31	62	59	43	32	44	46
2	ENSG00000138363	5-aminoimidazole-4-carboxamide ribonucleotide formyltransferase/IMP cyclohydrolase	ATIC	33	42	0.4	ENSG00000138363	-2.733	0.702	-1.578	-1.954	-1.537	-1.467	-0.299	-0.007	0.814	-0.647	0.063	0.202	-0.257	1.843	0.007	0.466	0.522	1.398	ENSG00000138363	ATIC	33	42	0.4	0.2	23	48	31	28	31	32	40	42	48	38	43	44	41	56	43	46	46	53
2	ENSG00000106348	IMP (inosine monophosphate) dehydrogenase 1	IMPDH1	22	32	0.5	ENSG00000106348	-0.92	0.199	-1.625	-1.947	-1.395	-0.797	-0.307	0.445	1.993	0.629	-0.107	0.72	0.337	0.782	2.606	-0.031	0.031	-0.337	ENSG00000106348	IMPDH1	22	32	0.5	0.2	23	31	19	17	20	24	27	32	42	34	29	34	32	35	46	29	30	27
2	ENSG00000178035	IMP (inosine monophosphate) dehydrogenase 2	IMPDH2	49	69	0.5	ENSG00000178035	-1.832	1.863	-1.648	-1.694	-0.537	-0.115	-0.046	-0.092	-0.812	0.291	-0.046	0.253	0.161	0.95	0.046	2.46	5.02	1.725	ENSG00000178035	IMPDH2	49	69	0.5	0.3	36	84	38	38	53	58	59	59	49	64	59	63	62	72	60	92	125	82
2	ENSG00000196839	adenosine deaminase	ADA	13	28	1.1	ENSG00000196839	-0.917	-0.519	-0.856	-0.934	-0.796	-0.614	0	0.588	2.534	0.372	0.519	-0.735	2.274	0.061	1.392	-0.251	0.77	0	ENSG00000196839	ADA	13	28	1.1	0.5	11	16	12	11	13	15	22	29	51	26	28	13	48	23	38	19	31	22
2	ENSG00000004455	adenylate kinase 2	AK2	31	50	0.7	ENSG00000004455	-1.245	-0.111	-1.185	-1.104	-0.93	-0.654	-0.48	0.178	0.097	-0.097	0.352	-0.379	2.238	1.111	0.695	0.446	1.359	0.977	ENSG00000004455	AK2	31	50	0.7	0.3	26	43	27	28	31	35	37	47	46	43	50	39	78	61	55	51	65	59
2	ENSG00000100938	guanosine monophosphate reductase 2	GMPR2	26	48	0.9	ENSG00000100938	-1.585	0.323	-1.557	-2.957	-0.951	-0.842	-0.04	0.04	-0.271	-0.329	0.605	0.196	0.265	1.078	0.83	0.64	0.709	-2.957	ENSG00000100938	GMPR2	26	48	0.9	0.5	24	57	24	0	35	37	51	52	47	46	62	55	56	70	66	63	64	0
2	ENSG00000165704	hypoxanthine phosphoribosyltransferase 1	HPRT1	17	26	0.6	ENSG00000165704	-1.334	-0.57	-1.529	-1.319	0.03	-0.285	0.51	-0.465	-0.27	-1.604	1.289	-0.03	1.394	1.034	1.004	0.255	0.779	0.105	ENSG00000165704	HPRT1	17	26	0.6	0.3	16	21	15	16	25	23	28	22	23	14	34	25	34	32	32	27	30	26
2	ENSG00000125877	inosine triphosphatase (nucleoside triphosphate pyrophosphatase)	ITPA	23	38	0.7	ENSG00000125877	-2.004	-1.225	-2.992	-2.27	-1.491	-0.275	-0.313	0.712	0.56	0.636	0.275	-0.313	2.65	0.427	0.332	-0.408	4.968	0.94	ENSG00000125877	ITPA	23	38	0.7	0.3	24	28	19	23	27	33	33	38	38	38	36	33	49	37	36	32	61	40
2	ENSG00000011052	non-metastatic cells 1, protein (NM23A) expressed in; NME1-NME2 readthrough transcript; non-metastatic cells 2, protein (NM23B) expressed in	NME2	9	14	0.7	ENSG00000011052	-0.14	0.267	-1.489	-1.54	-0.216	-0.242	0.7	0.14	-0.624	-0.395	2.354	1.54	3.322	1.896	-0.395	1.413	1.591	-0.649	ENSG00000011052	NME2	9	14	0.7	0.4	11	13	6	6	11	11	15	12	9	10	21	18	25	19	10	17	18	9
2	ENSG00000198805	nucleoside phosphorylase	PNP	10	14	0.5	ENSG00000198805	-0.666	0.51	-0.683	-0.683	-0.372	-0.597	-0.009	0.804	0.32	-0.7	-0.545	-0.009	1.046	1.479	0.009	1.34	1.15	0.925	ENSG00000198805	PNP	10	14	0.5	0.3	8	15	8	8	10	9	12	17	14	8	9	12	18	21	12	20	19	18
2	ENSG00000164978	nudix (nucleoside diphosphate linked moiety X)-type motif 2	NUDT2	10	19	0.9	ENSG00000164978	-1.482	0.478	-1.341	-0.745	-1.043	-0.024	-0.275	-0.557	0.745	-0.024	0.51	0.98	1.561	0.039	-0.604	0.024	3.474	1.529	ENSG00000164978	NUDT2	10	19	0.9	0.5	6	18	7	10	8	15	13	12	20	15	18	21	25	15	11	15	37	25
2	ENSG00000165609	nudix (nucleoside diphosphate linked moiety X)-type motif 5	NUDT5	20	31	0.6	ENSG00000165609	-1.236	-0.049	-1.516	-1.171	-0.772	-0.782	-0.351	0.178	0.049	-0.826	0.34	-0.049	2.034	1.452	0.793	0.556	0.577	0.372	ENSG00000165609	NUDT5	20	31	0.6	0.3	18	29	15	19	22	22	26	31	30	22	33	29	48	43	37	35	35	33
2	ENSG00000156973	phosphodiesterase 6D, cGMP-specific, rod, delta	PDE6D	12	22	0.8	ENSG00000156973	-1.857	-0.245	-2.05	-1.875	-1.664	-0.701	0.088	-0.088	-0.228	-0.823	0.876	0.491	2.295	0.613	0.648	0.105	0.841	0.14	ENSG00000156973	PDE6D	12	22	0.8	0.3	10	19	9	10	11	17	21	20	19	16	26	23	34	24	24	21	25	21
2	ENSG00000101911	phosphoribosyl pyrophosphate synthetase 2	PRPS2	10	17	0.8	ENSG00000101911	-1.551	-0.185	-1.231	-1.012	-0.776	-0.944	-0.573	0.084	0.202	-0.084	0.185	-0.169	1.13	1.804	0.169	0.27	1.298	1.787	ENSG00000101911	PRPS2	10	17	0.8	0.4	6	14	8	9	11	10	12	16	17	15	17	14	22	26	16	17	23	26
2	ENSG00000128050	phosphoribosylaminoimidazole carboxylase, phosphoribosylaminoimidazole succinocarboxamide synthetase	PAICS	11	16	0.6	ENSG00000128050	-1.776	0.067	-1.237	-1.349	-0.067	-0.652	-0.495	-0.36	0.54	-0.697	0.247	0.067	3.71	2.563	1.102	-3.44	0.27	1.731	ENSG00000128050	PAICS	11	16	0.6	0.5	8	16	10	9	15	13	13	14	18	12	17	16	32	27	20	0	17	23
2	ENSG00000159131	phosphoribosylglycinamide formyltransferase, phosphoribosylglycinamide synthetase, phosphoribosylaminoimidazole synthetase	GART	11	15	0.4	ENSG00000159131	-0.989	0.771	-0.437	-0.655	-0.848	-0.694	-0.771	0.874	1.221	0.231	-0.283	-0.231	0.938	1.041	0.295	0.321	-0.334	0.501	ENSG00000159131	GART	11	15	0.4	0.4	6	20	10	9	7	8	8	20	23	15	11	12	21	22	16	16	11	18
2	ENSG00000106628	polymerase (DNA directed), delta 2, regulatory subunit 50kDa	POLD2	27	36	0.4	ENSG00000106628	-1.391	1.114	-1.223	-1.849	-1.704	-0.283	-0.861	0.175	0.078	1.174	-0.078	-0.199	1.439	0.283	-0.295	0.114	1.512	0.488	ENSG00000106628	POLD2	27	36	0.4	0.2	23	44	24	19	20	32	27	36	35	44	34	33	46	37	32	35	47	38
2	ENSG00000175482	polymerase (DNA-directed), delta 4	POLD4	53	68	0.4	ENSG00000175482	-0.679	0.67	-0.759	-1.417	-0.63	-0.847	-0.614	-0.028	-0.044	0.63	-0.124	0.028	2.276	1.634	2.517	0.478	3.248	0.687	ENSG00000175482	POLD4	53	68	0.4	0.2	51	68	50	42	52	49	52	59	59	67	58	60	88	80	91	65	100	68
2	ENSG00000099817	polymerase (RNA) II (DNA directed) polypeptide E, 25kDa	POLR2E	52	67	0.4	ENSG00000099817	-1.281	0.864	-1.448	-1.181	-1.355	-0.323	0.106	-0.361	-0.535	0.137	0.497	-0.106	1.392	0.814	1.25	-0.124	1.585	0.398	ENSG00000099817	POLR2E	52	67	0.4	0.2	43	78	41	45	42	59	66	58	55	66	72	62	86	77	84	62	90	70
2	ENSG00000100142	polymerase (RNA) II (DNA directed) polypeptide F	POLR2F	31	42	0.4	ENSG00000100142	-0.125	-0.362	-2.211	-1.21	-1.099	0.362	0.389	-0.292	-0.793	-1.21	1.655	0.556	2.587	1.126	0.042	-0.042	3.838	0.487	ENSG00000100142	POLR2F	31	42	0.4	0.3	37	35	22	29	30	40	41	36	32	29	50	42	56	46	38	38	65	41
2	ENSG00000168002	polymerase (RNA) II (DNA directed) polypeptide G	POLR2G	43	63	0.5	ENSG00000168002	-2.071	-0.531	-1.88	-1.845	-1.654	-1.358	-0.052	0.052	-0.139	-1.218	0.818	0.27	1.601	0.374	0.531	0.244	1.976	0.122	ENSG00000168002	POLR2G	43	63	0.5	0.2	38	55	40	40	42	46	61	62	60	47	71	64	80	66	67	64	84	63
2	ENSG00000177700	polymerase (RNA) II (DNA directed) polypeptide L, 7.6kDa	POLR2L	52	68	0.4	ENSG00000177700	0.053	-0.106	-1.92	-1.043	-0.997	-0.053	-0.319	-1.203	-1.602	-0.684	1.708	0.665	1.927	0.352	0.326	0.472	2.891	0.1	ENSG00000177700	POLR2L	52	68	0.4	0.3	64	62	34	48	48	63	59	45	39	53	89	73	92	69	68	70	107	65
2	ENSG00000143363	prune homolog (Drosophila)	PRUNE	13	14	0.1	ENSG00000143363	-0.776	1.743	-0.42	-0.853	-0.573	-1.031	-0.42	0.318	-0.369	-0.776	-0.242	0.242	0.293	1.845	0.827	1.54	0.445	2.049	ENSG00000143363	PRUNE	13	14	0.1	0.3	10	20	11	10	11	9	11	14	12	10	12	14	14	20	16	19	15	21
2	ENSG00000171848	ribonucleotide reductase M2 polypeptide	RRM2	5	25	2.2	ENSG00000171848	-0.056	-0.725	-0.68	-0.401	-0.29	-0.089	0.301	0.056	1.717	-0.546	3.501	0.881	13.78	2.809	2.776	0.346	-0.992	-0.669	ENSG00000171848	RRM2	5	25	2.2	1.5	9	3	4	6	7	9	12	10	25	5	41	18	133	35	35	13	1	4
2	ENSG00000067225	similar to Pyruvate kinase, isozymes M1/M2 (Pyruvate kinase muscle isozyme) (Cytosolic thyroid hormone-binding protein) (CTHBP) (THBP1); pyruvate kinase, muscle	PKM	172	240	0.5	ENSG00000067225	-1.545	0.304	-1.303	-1.554	-0.817	-0.745	-0.037	-0.041	0.217	-0.993	0.58	0.259	0.604	1.259	2.235	-0.116	0.037	0.752	ENSG00000067225	PKM	172	240	0.5	0.2	142	248	156	141	184	188	228	228	243	174	264	245	265	303	359	224	233	274
3	Lysosome	GENE NAME	Symbol	avgCON	avgAFF	log(a/c)	ENSG	N048	N068	N090	N098	L005	L137	L101	L062	L149	L140	L031	L072	L133	L074	L078	L102	L115	L027	pureENSG	gene	avgCON	avgAFF	log(a/c)	CV	N048	N068	N090	N098	L005	L137	L101	L062	L149	L140	L031	L072	L133	L074	L078	L102	L115	L027
3	ENSG00000117410	ATPase, H+ transporting, lysosomal 21kDa, V0 subunit b	ATP6V0B	41	50	0.3	ENSG00000117410	0.012	-0.012	-1.046	-0.699	-0.521	-0.683	-0.691	0.666	0.117	-0.885	0.335	0.497	2.137	1.2	1.434	-0.141	1.288	-0.359	ENSG00000117410	ATP6V0B	41	50	0.3	0.2	47	46	33	38	40	38	38	55	48	35	51	53	73	61	64	45	62	42
3	ENSG00000159720	ATPase, H+ transporting, lysosomal 38kDa, V0 subunit d1	ATP6V0D1	31	35	0.2	ENSG00000159720	0.521	-0.674	-0.889	0.031	0.429	-1.395	-0.674	-0.782	0.245	-1.257	-0.031	-0.215	3.219	1.349	3.94	0.414	0.797	-0.337	ENSG00000159720	ATP6V0D1	31	35	0.2	0.3	36	28	26	32	35	23	28	27	34	24	32	31	53	41	58	35	37	30
3	ENSG00000135404	CD63 molecule	CD63	61	98	0.7	ENSG00000135404	0.003	-0.834	-0.836	-0.866	-0.573	0.088	0.09	-0.003	-0.23	-0.897	2.495	0.776	-0.568	0.452	1.475	1.047	1.132	-0.047	ENSG00000135404	CD63	61	98	0.7	0.4	84	53	53	52	63	87	87	84	75	51	175	112	63	100	138	122	125	82
3	ENSG00000129226	CD68 molecule	CD68	5	32	2.7	ENSG00000129226	-0.219	0.109	-0.51	-0.79	2.662	-0.632	-0.109	0.96	1.422	-0.717	-0.17	1.483	4.849	1.774	25.12	0.535	-0.595	-0.194	ENSG00000129226	CD68	5	32	2.7	2	6	9	4	1	30	3	7	16	19	2	6	20	48	22	214	12	3	6
3	ENSG00000111670	N-acetylglucosamine-1-phosphate transferase, alpha and beta subunits	GNPTAB	11	18	0.7	ENSG00000111670	-1.342	-0.136	-0.897	-1.055	-0.997	-0.94	-0.481	0.854	0.524	-0.122	0.309	0.122	-0.624	0.71	0.969	0.739	0.395	0.639	ENSG00000111670	GNPTAB	11	18	0.7	0.3	7	16	10	9	10	10	13	22	20	16	19	17	12	21	23	22	19	21
3	ENSG00000104763	N-acylsphingosine amidohydrolase (acid ceramidase) 1	ASAH1	33	52	0.6	ENSG00000104763	-1.057	-0.584	-1.097	-1.258	0.765	-0.946	-0.312	-0.04	0.03	-1.339	0.544	0.282	2.698	0.513	7.289	0.775	-0.03	0.383	ENSG00000104763	ASAH1	33	52	0.6	0.4	32	37	32	30	51	34	40	43	43	30	48	46	70	48	115	51	43	47
3	ENSG00000102575	acid phosphatase 5, tartrate resistant	ACP5	15	20	0.4	ENSG00000102575	-0.698	0.106	-0.769	-0.379	-0.71	-0.674	-0.674	0.095	1.55	0.674	0.012	-0.39	0.982	1.787	0.166	-0.296	0.899	-0.012	ENSG00000102575	ACP5	15	20	0.4	0.3	12	19	12	15	12	13	13	19	31	24	18	15	27	33	20	16	26	18
3	ENSG00000106367	adaptor-related protein complex 1, sigma 1 subunit	AP1S1	9	15	0.8	ENSG00000106367	-1.166	-0.114	-1.532	-1.623	-1.029	-0.091	0.526	0.091	0.183	-0.96	2.103	0.572	2.561	1.052	0.777	-0.297	0.549	-0.252	ENSG00000106367	AP1S1	9	15	0.8	0.4	8	13	7	6	9	13	16	14	14	9	23	16	25	18	17	12	16	12
3	ENSG00000182287	adaptor-related protein complex 1, sigma 2 subunit pseudogene; adaptor-related protein complex 1, sigma 2 subunit	AP1S2	17	25	0.6	ENSG00000182287	-1.747	0.022	-2.012	-2.234	-0.177	-0.708	0.354	0.332	-1.526	-2.41	0.221	-0.088	-0.022	2.433	4.622	0.641	1.548	0.619	ENSG00000182287	AP1S2	17	25	0.6	0.3	16	24	14	13	23	20	25	25	17	13	24	23	23	34	44	26	30	26
3	ENSG00000109861	cathepsin C	CTSC	25	63	1.4	ENSG00000109861	-0.848	-0.691	-0.951	-0.972	-0.593	-0.658	-0.034	0.105	0.463	-0.711	0.945	0.075	1.013	0.46	1.741	0.034	1.176	-0.362	ENSG00000109861	CTSC	25	63	1.4	0.5	25	31	22	21	34	32	53	58	70	30	86	57	88	70	113	55	94	42
3	ENSG00000117984	cathepsin D	CTSD	64	103	0.7	ENSG00000117984	-1.13	-0.052	-1.474	-1.631	-0.821	-0.834	0.375	0.094	-0.327	-0.713	1.227	0.052	0.636	0.483	2.729	1.172	-0.163	0.073	ENSG00000117984	CTSD	64	103	0.7	0.3	63	94	53	48	71	71	106	98	86	75	130	97	113	109	174	129	90	97
3	ENSG00000100448	cathepsin G	CTSG	1	33	5.4	ENSG00000100448	-0.674	-0.674	0.117	-0.674	0.469	1.085	-0.674	-0.674	1.877	0.88	-0.147	-0.117	-0.235	0.176	-0.176	98.534	5.191	0.293	ENSG00000100448	CTSG	1	33	5.4	3.5	0	0	3	0	4	6	0	0	9	5	2	2	2	3	2	338	20	3
3	ENSG00000103811	cathepsin H	CTSH	26	43	0.7	ENSG00000103811	0.099	-0.82	-0.815	-0.69	0.97	-0.15	0.628	-0.405	-0.68	-1.557	1.147	0.669	0.431	2.449	3.092	-0.104	0.617	-0.099	ENSG00000103811	CTSH	26	43	0.7	0.5	38	20	21	23	55	33	48	28	23	6	58	49	45	83	96	34	48	34
3	ENSG00000163131	cathepsin S	CTSS	88	230	1.4	ENSG00000163131	-0.915	-0.667	-1.179	-1.304	0.271	-0.737	-0.052	-0.032	-0.011	-0.943	0.682	0.129	1.015	0.836	6.981	0.011	0.405	0.386	ENSG00000163131	CTSS	88	230	1.4	0.8	96	117	74	63	196	111	169	170	172	94	230	184	258	243	759	174	207	205
3	ENSG00000172543	cathepsin W	CTSW	129	230	0.8	ENSG00000172543	0.257	-1.554	-1.439	-0.78	-0.876	0.047	0.945	-1.417	-0.208	0.276	4.762	0.279	-0.569	-0.047	0.313	0.127	1.24	-0.841	ENSG00000172543	CTSW	129	230	0.8	0.6	230	69	79	138	129	211	291	81	189	232	630	232	157	203	235	218	317	132
3	ENSG00000101160	cathepsin Z	CTSZ	18	40	1.2	ENSG00000101160	-0.42	-0.831	-1.173	-1.799	0.098	-0.508	-0.626	0.02	-0.02	-1.31	0.323	0.723	3.402	1.427	9.238	0.196	1.398	-0.059	ENSG00000101160	CTSZ	18	40	1.2	0.7	24	20	17	10	30	23	22	29	28	15	32	36	63	43	123	31	43	28
3	ENSG00000105612	deoxyribonuclease II, lysosomal	DNASE2	11	18	0.7	ENSG00000105612	-1.229	-0.29	-1.469	-1.4	-0.666	-0.905	0.068	-0.427	0.137	-0.888	0.683	0.171	0.905	1.007	2.134	-0.034	0.034	0.512	ENSG00000105612	DNASE2	11	18	0.7	0.3	10	16	9	9	14	12	18	15	18	12	22	19	23	24	30	17	18	21
3	ENSG00000135677	glucosamine (N-acetyl)-6-sulfatase	GNS	10	20	1	ENSG00000135677	-1.187	-0.189	-1.025	-1.255	-0.216	-1.174	-0.013	0.067	0.27	-1.066	0.782	0.013	0.769	0.85	6.219	0.513	-0.58	0.135	ENSG00000135677	GNS	10	20	1	0.7	8	15	9	8	15	8	17	17	19	9	23	17	23	23	63	21	13	18
3	ENSG00000049860	hexosaminidase B (beta polypeptide)	HEXB	16	24	0.6	ENSG00000049860	-2.178	-0.055	-2.952	-2.731	-1.824	-2.001	0.144	-0.166	-0.254	-1.935	0.807	0.055	0.077	1.493	1.338	0.409	0.077	0.542	ENSG00000049860	HEXB	16	24	0.6	0.3	15	25	12	13	17	16	26	24	24	16	29	25	25	32	31	27	25	27
3	ENSG00000107798	lipase A, lysosomal acid, cholesterol esterase	LIPA	28	40	0.5	ENSG00000107798	-0.649	-0.112	-1.046	-1.012	-0.035	-0.363	0.7	0.052	-0.527	-0.943	2.439	0.035	-0.467	0.899	1.159	0.208	1.297	1.15	ENSG00000107798	LIPA	28	40	0.5	0.3	28	34	24	24	35	32	44	36	30	25	64	36	30	46	49	38	51	49
3	ENSG00000005893	lysosomal-associated membrane protein 2	LAMP2	21	30	0.5	ENSG00000005893	-1.235	-0.621	-0.728	-1.329	0.18	-1.022	0.327	-0.127	-0.033	-1.743	1.142	-0.26	0.581	1.569	2.077	1.382	0.033	0.541	ENSG00000005893	LAMP2	21	30	0.5	0.3	19	24	23	19	30	21	31	28	28	15	37	27	33	40	44	39	29	33
3	ENSG00000078081	lysosomal-associated membrane protein 3	LAMP3	2	13	2.8	ENSG00000078081	-0.923	-0.876	-0.615	-0.97	-0.71	-0.225	0.059	0.639	1.349	0.627	1.834	-0.379	1.207	1.976	-0.059	-0.627	0.627	1.112	ENSG00000078081	LAMP3	2	13	2.8	0.7	1	2	4	1	3	7	10	14	20	14	25	6	19	26	9	4	14	18
3	ENSG00000003056	mannose-6-phosphate receptor (cation dependent)	M6PR	66	116	0.8	ENSG00000003056	-1.165	-0.006	-1.731	-1.394	-1.294	-0.74	-0.488	0.006	0.624	-0.725	0.557	0.364	1.77	1.201	1.312	0.57	0.3	-0.14	ENSG00000003056	M6PR	66	116	0.8	0.4	62	107	40	53	57	79	89	108	132	79	129	122	176	154	159	130	119	102
3	ENSG00000131238	palmitoyl-protein thioesterase 1	PPT1	53	73	0.5	ENSG00000131238	-0.818	0.504	-0.867	-1.128	0.168	-0.221	0.756	-0.168	-0.597	-0.765	0.916	-0.287	-0.195	0.708	2.11	0.641	0.5	1.455	ENSG00000131238	PPT1	53	73	0.5	0.3	48	78	47	41	70	61	83	62	53	49	87	60	62	82	114	81	78	99
3	ENSG00000197746	prosaposin	PSAP	159	268	0.8	ENSG00000197746	-0.191	-0.481	-0.601	-1.206	1.158	-0.728	0.329	0.145	-0.001	-1.337	0.959	1.023	2.336	0.771	11.379	-0.13	-0.621	0.001	ENSG00000197746	PSAP	159	268	0.8	0.7	185	167	160	124	266	152	216	205	196	116	254	258	337	243	883	188	159	196
3	ENSG00000166340	tripeptidyl peptidase I	TPP1	32	51	0.7	ENSG00000166340	-1.38	-0.054	-0.612	-1.473	-0.512	-0.504	0.737	0.302	0.737	0.016	2.923	-0.016	-0.031	1.667	2.9	1.016	-0.016	1.054	ENSG00000166340	TPP1	32	51	0.7	0.3	25	42	35	24	36	36	52	47	52	43	81	43	43	64	80	56	43	57
4	Proteosome	GENE NAME	Symbol	avgCON	avgAFF	log(a/c)	ENSG	N048	N068	N090	N098	L005	L137	L101	L062	L149	L140	L031	L072	L133	L074	L078	L102	L115	L027	pureENSG	gene	avgCON	avgAFF	log(a/c)	CV	N048	N068	N090	N098	L005	L137	L101	L062	L149	L140	L031	L072	L133	L074	L078	L102	L115	L027
4	ENSG00000087191	proteasome (prosome, macropain) 26S subunit, ATPase, 5	PSMC5	73	114	0.6	ENSG00000087191	-3.14	0.036	-3.295	-3.528	-2.191	-0.728	0.478	-0.621	-0.185	-1.242	0.597	-0.036	1.092	1.033	0.561	0.155	1.236	0.579	ENSG00000087191	PSMC5	73	114	0.6	0.2	62	115	60	56	78	103	123	104	112	94	125	114	133	132	124	117	135	124
4	ENSG00000173692	proteasome (prosome, macropain) 26S subunit, non-ATPase, 1	PSMD1	13	17	0.4	ENSG00000173692	-1.144	0.283	-0.753	-0.616	-0.362	-0.655	-0.694	0.44	0.987	-0.714	-0.049	0.068	1.183	1.183	1.202	0.049	-0.303	0.714	ENSG00000173692	PSMD1	13	17	0.4	0.2	10	17	12	12	14	12	12	18	21	12	15	16	22	22	22	16	14	19
4	ENSG00000185627	proteasome (prosome, macropain) 26S subunit, non-ATPase, 13	PSMD13	59	78	0.4	ENSG00000185627	-1.627	-0.058	-1.417	-0.819	-1.123	-1.171	-0.073	0.178	0.11	-1.045	0.058	-0.094	1.596	0.94	0.745	0.173	0.604	0.336	ENSG00000185627	PSMD13	59	78	0.4	0.2	47	77	51	62	56	56	76	81	80	58	79	76	108	96	92	81	89	84
4	ENSG00000115233	proteasome (prosome, macropain) 26S subunit, non-ATPase, 14	PSMD14	13	19	0.5	ENSG00000115233	-1.317	-0.578	-1.702	-1.381	0.064	-0.482	0.321	-0.578	0.128	-2.184	2.248	-0.096	3.918	2.409	1.67	-0.064	0.546	0.771	ENSG00000115233	PSMD14	13	19	0.5	0.3	13	16	12	13	18	16	18	16	18	11	24	17	30	25	23	17	19	20
4	ENSG00000175166	proteasome (prosome, macropain) 26S subunit, non-ATPase, 2	PSMD2	58	75	0.4	ENSG00000175166	-1.568	0.544	-1.124	-1.162	-1.465	-1.471	-0.805	0.041	0.469	-0.041	0.214	-0.138	2.002	1.617	1.167	-0.366	0.225	0.198	ENSG00000175166	PSMD2	58	75	0.4	0.3	44	83	53	52	46	46	59	74	82	73	77	71	110	103	95	67	78	77
4	ENSG00000159352	proteasome (prosome, macropain) 26S subunit, non-ATPase, 4	PSMD4	60	89	0.6	ENSG00000159352	-2.067	0.107	-1.812	-1.98	-1.232	-0.596	0.092	-0.081	-0.484	-1.176	0.753	0.081	1.507	0.896	1.054	-0.097	0.524	0.504	ENSG00000159352	PSMD4	60	89	0.6	0.2	48	90	53	49	64	76	90	87	79	65	103	90	118	106	109	86	98	98
4	ENSG00000099341	proteasome (prosome, macropain) 26S subunit, non-ATPase, 8	PSMD8	56	80	0.5	ENSG00000099341	-0.74	-0.609	-1.537	-0.84	-0.579	-0.554	0.323	-0.449	0.093	-1.161	1.101	0.108	2.42	1.377	1.316	-0.093	0.97	0.163	ENSG00000099341	PSMD8	56	80	0.5	0.3	60	62	44	58	63	64	81	66	76	51	97	77	123	102	101	73	94	78
4	ENSG00000092010	proteasome (prosome, macropain) activator subunit 1 (PA28 alpha)	PSME1	254	405	0.7	ENSG00000092010	-0.94	-0.929	-1.395	-1.37	-0.524	-0.356	0.695	-0.217	0.372	-0.635	2.046	0.186	1.048	0.686	0.663	-0.186	1.435	0.255	ENSG00000092010	PSME1	254	405	0.7	0.2	276	277	230	232	318	335	441	349	408	306	577	389	476	440	438	352	515	396
4	ENSG00000100911	proteasome (prosome, macropain) activator subunit 2 (PA28 beta)	PSME2	131	296	1.2	ENSG00000100911	-0.786	-0.641	-0.956	-0.931	-0.594	-0.124	0.071	-0.015	0.746	-0.198	1.053	0.015	1.575	0.708	0.837	-0.304	1.128	0.214	ENSG00000100911	PSME2	131	296	1.2	0.4	137	157	113	117	164	229	256	244	350	219	392	248	465	344	362	204	403	276
4	ENSG00000106588	proteasome (prosome, macropain) subunit, alpha type, 2	PSMA2	63	80	0.3	ENSG00000106588	-0.54	-1.005	-1.268	-0.994	0.199	-0.803	-0.048	-1.072	-0.546	-2.566	0.949	0.048	2.32	1.257	0.473	0.311	0.372	0.417	ENSG00000106588	PSMA2	63	80	0.3	0.2	70	62	57	62	84	66	79	61	70	34	97	81	122	103	89	86	87	88
4	ENSG00000041357	proteasome (prosome, macropain) subunit, alpha type, 4	PSMA4	57	80	0.5	ENSG00000041357	-0.671	-0.814	-0.942	-0.799	0.151	-0.414	-0.196	-0.173	1.635	-2.125	0.678	0.143	6.918	1.439	3.572	0.083	0.362	-0.083	ENSG00000041357	PSMA4	57	80	0.5	0.4	59	57	55	57	70	62	65	65	89	39	77	70	159	87	115	69	72	67
4	ENSG00000143106	proteasome (prosome, macropain) subunit, alpha type, 5	PSMA5	31	67	1.1	ENSG00000143106	-1.064	-0.249	-1.022	-1.073	-0.926	-0.683	-0.588	-0.075	0.345	-0.665	0.357	0.075	1.877	1.235	0.788	0.126	0.788	0.549	ENSG00000143106	PSMA5	31	67	1.1	0.5	24	51	26	24	29	37	40	57	71	38	72	62	122	101	86	64	86	78
4	ENSG00000100902	proteasome (prosome, macropain) subunit, alpha type, 6	PSMA6	60	95	0.7	ENSG00000100902	-0.884	-0.859	-0.877	-0.954	-0.398	-0.633	-0.023	0.023	0.075	-0.85	0.877	0.203	1.613	0.905	0.429	-0.182	0.716	0.316	ENSG00000100902	PSMA6	60	95	0.7	0.3	61	61	61	58	76	69	89	90	92	62	118	96	142	119	104	84	113	100
4	ENSG00000101182	proteasome (prosome, macropain) subunit, alpha type, 7	PSMA7	99	126	0.3	ENSG00000101182	-0.932	-0.456	-1.252	-0.202	-1.484	-0.29	-0.368	0.257	1.175	-0.334	0.495	0.202	3.591	1.965	1.435	-0.528	4.177	0.821	ENSG00000101182	PSMA7	99	126	0.3	0.2	95	104	89	108	85	107	105	117	133	106	121	116	177	148	138	103	188	127
4	ENSG00000205220	proteasome (prosome, macropain) subunit, beta type, 10	PSMB10	82	136	0.7	ENSG00000205220	-1.316	-0.171	-1.199	-1.173	-1.089	-0.923	-0.426	-0.049	0.141	-0.35	0.416	0.185	2.006	1.001	1.196	0.049	1.284	0.35	ENSG00000205220	PSMB10	82	136	0.7	0.3	67	117	72	73	77	84	106	122	130	109	142	132	212	168	176	126	180	140
4	ENSG00000108294	proteasome (prosome, macropain) subunit, beta type, 3	PSMB3	62	96	0.6	ENSG00000108294	-0.712	-0.458	-1.45	-1.093	-0.637	-0.486	0.137	-0.054	0.093	-1.418	1.113	0.522	3.216	1.664	1.438	-0.097	1.593	0.054	ENSG00000108294	PSMB3	62	96	0.6	0.3	67	73	48	57	69	73	88	84	87	49	113	98	166	127	121	82	125	86
4	ENSG00000142507	proteasome (prosome, macropain) subunit, beta type, 6	PSMB6	54	73	0.4	ENSG00000142507	-0.291	-0.958	-1.31	-0.857	-0.291	-0.061	0.061	-0.47	0.083	-1.632	1.898	0.477	3.003	1.726	1.589	-0.492	1.905	0.298	ENSG00000142507	PSMB6	54	73	0.4	0.2	61	52	47	53	61	65	66	59	67	43	92	72	107	89	88	59	92	70
4	ENSG00000013275	similar to 26S protease regulatory subunit 6B (MIP224) (MB67-interacting protein) (TAT-binding protein 7) (TBP-7); proteasome (prosome, macropain) 26S subunit, ATPase, 4	PSMC4	29	39	0.4	ENSG00000013275	-0.669	0.06	-0.941	-0.615	-0.843	-0.81	-0.68	-0.201	0.952	-0.582	0.332	0.321	2.595	1.115	2.138	-0.06	1.398	0.636	ENSG00000013275	PSMC4	29	39	0.4	0.3	28	35	26	29	27	27	28	32	43	29	37	37	58	45	54	34	47	40
4	ENSG00000127922	split hand/foot malformation (ectrodactyly) type 1	SHFM1	54	76	0.5	ENSG00000127922	-0.874	0.137	-0.981	-0.297	-0.059	0.891	-0.333	-0.517	-0.333	-0.808	0.059	0.565	4.742	1.747	1.581	-0.434	2.942	0.784	ENSG00000127922	SHFM1	54	76	0.5	0.3	48	65	46	58	62	78	57	54	57	49	64	72	142	92	89	55	112	76
5	Natural Killer cell mediated cytotoxicity	GENE NAME	Symbol	avgCON	avgAFF	log(a/c)	ENSG	N048	N068	N090	N098	L005	L137	L101	L062	L149	L140	L031	L072	L133	L074	L078	L102	L115	L027	pureENSG	gene	avgCON	avgAFF	log(a/c)	CV	N048	N068	N090	N098	L005	L137	L101	L062	L149	L140	L031	L072	L133	L074	L078	L102	L115	L027
5	ENSG00000015475	BH3 interacting domain death agonist	BID	17	29	0.8	ENSG00000015475	-0.668	-0.681	-1.099	-1.293	0.028	-0.821	0	-0.236	0.236	-0.626	0	0.737	2.503	1.224	5.646	0.25	0.862	-0.07	ENSG00000015475	BID	17	29	0.8	0.4	19	19	16	14	24	18	24	22	25	19	24	29	42	32	64	25	30	23
5	ENSG00000122223	CD244 molecule, natural killer cell receptor 2B4	CD244	7	14	1	ENSG00000122223	0.016	-0.609	-0.642	-0.79	-0.823	-0.576	-0.181	0.839	0.905	-0.625	2.418	1.793	-0.016	0.461	2.451	0.707	0.724	-0.494	ENSG00000122223	CD244	7	14	1	0.5	10	6	6	5	5	7	9	15	16	6	25	21	10	13	25	14	15	7
5	ENSG00000158869	Fc fragment of IgE, high affinity I, receptor for; gamma polypeptide	FCER1G	14	92	2.7	ENSG00000158869	-0.839	-0.686	-0.992	-1.133	0.553	-0.834	-0.688	0.224	0.475	-0.663	-0.751	0.279	1.57	0.435	11.319	-0.153	0.241	0.153	ENSG00000158869	FCER1G	14	92	2.7	1.6	17	23	11	5	72	17	23	59	69	24	21	62	113	68	501	44	60	57
5	ENSG00000203747	Fc fragment of IgG, low affinity IIIa, receptor (CD16a)	FCGR3A	24	127	2.4	ENSG00000203747	-0.438	-0.738	-1.166	-1.199	0.091	-1.045	-0.091	1.501	0.559	-0.611	0.441	1.497	3.271	0.285	13.72	0.585	-1.076	-0.311	ENSG00000203747	FCGR3A	24	127	2.4	1.4	43	31	12	11	66	18	58	125	85	36	80	125	200	74	643	87	16	49
5	ENSG00000162747	Fc fragment of IgG, low affinity IIIb, receptor (CD16b)	FCGR3B	3	15	2.3	ENSG00000162747	0.201	-0.627	-1.1	-1.1	0.201	-0.982	0.722	0.793	-0.012	-0.414	-0.248	0.627	5.242	0.012	16.389	6.473	-1.053	-0.461	ENSG00000162747	FCGR3B	3	15	2.3	1.5	7	3	1	1	7	2	9	9	6	4	5	9	28	6	75	33	1	4
5	ENSG00000011600	TYRO protein tyrosine kinase binding protein	TYROBP	33	88	1.4	ENSG00000011600	0.65	-0.843	-0.855	-1.063	0.161	-0.858	-0.673	0.676	0.194	-0.893	-0.057	0.156	1.907	0.057	8.633	0.444	-1.073	-0.087	ENSG00000011600	TYROBP	33	88	1.4	1.3	83	20	19	10	62	19	27	84	63	17	53	62	136	58	421	74	10	52
5	ENSG00000187446	calcium binding protein P22	CHP1	12	17	0.5	ENSG00000187446	-0.622	-0.79	-0.959	-0.811	0.221	-0.516	0.221	0.053	-0.011	-1.549	1.36	0.011	0.79	1.275	2.308	0.664	-0.685	-0.011	ENSG00000187446	CHP1	12	17	0.5	0.3	13	12	11	12	17	14	17	16	16	9	22	16	20	22	27	19	13	16
5	ENSG00000100453	granzyme B (granzyme 2, cytotoxic T-lymphocyte-associated serine esterase 1)	GZMB	20	96	2.3	ENSG00000100453	-0.259	-0.877	-0.726	-0.822	-0.623	-0.487	-0.147	0.88	1.254	0.787	0.947	0.151	1.257	0.004	0.991	0.107	-0.382	-0.004	ENSG00000100453	GZMB	20	96	2.3	0.7	49	5	16	9	23	33	57	130	157	124	135	78	157	68	138	75	40	67
5	ENSG00000126264	hematopoietic cell signal transducer	HCST	228	328	0.5	ENSG00000126264	-0.243	0.014	-1.364	-1.026	-0.871	0.439	1.295	-0.088	-0.858	-0.636	3.555	0.89	-0.014	0.713	-0.133	0.252	2.21	0.608	ENSG00000126264	HCST	228	328	0.5	0.3	265	289	163	194	208	327	405	279	209	229	612	368	286	352	275	310	489	343
5	ENSG00000108622	intercellular adhesion molecule 2	ICAM2	65	82	0.3	ENSG00000108622	-1.19	0.924	-0.7	-0.324	-0.729	-0.535	-0.649	0.091	0.488	-0.755	-0.315	0.15	0.493	2.159	1.672	-0.091	2.091	2.129	ENSG00000108622	ICAM2	65	82	0.3	0.3	44	94	56	65	55	60	57	75	84	55	65	76	84	124	112	70	122	123
5	ENSG00000159128	interferon gamma receptor 2 (interferon gamma transducer 1)	IFNGR2	12	19	0.7	ENSG00000159128	-0.02	-0.121	-0.523	-0.946	0.081	-0.423	-1.047	0.02	-0.221	2.859	-1.55	-0.403	0.825	0.987	2.235	2.96	6.141	0.262	ENSG00000159128	IFNGR2	12	19	0.7	0.5	14	13	11	9	14	12	8	14	13	28	6	12	18	19	25	28	44	15
5	ENSG00000134539	killer cell lectin-like receptor subfamily D, member 1	KLRD1	12	39	1.7	ENSG00000134539	-0.193	-1.078	-0.977	-1.069	-1.093	-0.783	-0.024	1.102	0.401	0.039	3.341	0.948	-0.131	0.024	0.962	0.488	0.566	-0.155	ENSG00000134539	KLRD1	12	39	1.7	0.7	25	7	9	7	7	13	29	52	38	30	99	49	27	30	49	40	41	26
5	ENSG00000213809	killer cell lectin-like receptor subfamily K, member 1	KLRK1	66	111	0.7	ENSG00000213809	-1.689	0.796	-1.902	-2.196	-2.055	-1.659	0.001	1.653	-0.457	0.355	1.605	1.893	-0.307	0.205	-0.472	0.058	0.553	-0.001	ENSG00000213809	KLRK1	66	111	0.7	0.4	52	135	45	35	39	53	108	163	93	120	162	171	98	115	92	110	126	108
5	ENSG00000204525	major histocompatibility complex, class I, C; major histocompatibility complex, class I, B	HLA-C	235	344	0.6	ENSG00000204525	1.856	1.224	-0.729	-0.171	-0.62	1.317	-0.602	-0.608	-0.126	-0.534	3.629	3.947	2.367	-0.243	-0.507	2.826	0.126	2.062	ENSG00000204525	HLA-C	235	344	0.6	1	470	357	6	106	25	373	29	28	114	41	789	846	562	93	46	644	159	507
5	ENSG00000100030	mitogen-activated protein kinase 1	MAPK1	35	50	0.5	ENSG00000100030	-1.061	-0.021	-0.696	-0.604	-0.393	-1.124	-0.393	0.927	0.021	-0.372	0.653	-0.358	0.492	0.857	2.361	1.033	0.724	1.11	ENSG00000100030	MAPK1	35	50	0.5	0.3	29	43	34	35	38	28	38	57	44	38	53	39	51	56	77	58	54	60
5	ENSG00000169032	mitogen-activated protein kinase kinase 1	MAP2K1	24	28	0.2	ENSG00000169032	-0.323	0.885	-0.674	-0.464	-0.773	-1.054	-0.126	0.014	-0.169	0.112	-0.337	-0.014	0.674	1.237	1.012	0.998	2.009	1.714	ENSG00000169032	MAP2K1	24	28	0.2	0.2	23	31	20	22	20	18	24	25	24	26	23	25	30	34	32	32	39	37
5	ENSG00000180644	perforin 1 (pore forming protein)	PRF1	43	131	1.6	ENSG00000180644	-0.722	-1.184	-0.941	-1.03	-1.094	-1.143	-0.593	0.786	1.127	0.109	0.627	0.142	0.113	0.013	1.479	0.183	-0.413	-0.013	ENSG00000180644	PRF1	43	131	1.6	0.6	62	26	45	38	33	29	72	180	207	127	167	130	127	119	234	133	86	117
5	ENSG00000128340	ras-related C3 botulinum toxin substrate 2 (rho family, small GTP binding protein Rac2)	RAC2	301	520	0.8	ENSG00000128340	-1.478	0.386	-1.46	-1.536	-1.15	-0.853	-0.145	-0.327	-0.31	-0.624	0.413	0.145	0.273	1.136	1.646	0.674	1.185	0.675	ENSG00000128340	RAC2	301	520	0.8	0.4	216	565	219	205	277	333	465	431	434	376	570	520	544	705	801	619	714	619
5	ENSG00000121858	tumor necrosis factor (ligand) superfamily, member 10	TNFSF10	13	28	1.1	ENSG00000121858	-0.771	0.193	-0.881	-0.819	-0.613	-0.53	0.083	0.289	1.494	-0.736	-0.227	-0.303	1.067	1.342	2.884	-0.083	0.413	1.955	ENSG00000121858	TNFSF10	13	28	1.1	0.6	10	24	8	9	12	13	22	25	43	10	18	17	37	41	63	20	27	50
6	Antigen Processing And Presentation	GENE NAME	Symbol	avgCON	avgAFF	log(a/c)	ENSG	N048	N068	N090	N098	L005	L137	L101	L062	L149	L140	L031	L072	L133	L074	L078	L102	L115	L027	pureENSG	gene	avgCON	avgAFF	log(a/c)	CV	N048	N068	N090	N098	L005	L137	L101	L062	L149	L140	L031	L072	L133	L074	L078	L102	L115	L027
6	ENSG00000019582	CD74 molecule, major histocompatibility complex, class II invariant chain	CD74	754	834	0.1	ENSG00000019582	1.761	-1.141	0.36	-0.833	0.124	-0.704	-0.645	-0.012	-0.603	-1.136	1.349	-0.156	0.822	0.459	1.256	0.006	1.821	-0.006	ENSG00000019582	CD74	754	834	0.1	0.5	1467	267	887	394	790	447	472	733	489	269	1296	674	1079	928	1258	741	1491	736
6	ENSG00000153563	CD8a molecule	CD8A	178	257	0.5	ENSG00000153563	-0.36	-0.702	-0.647	0.197	-0.594	-0.489	1.353	-0.018	-0.722	1.392	3.777	1.271	0.856	0.018	-1.21	0.239	3.177	-0.557	ENSG00000153563	CD8A	178	257	0.5	0.4	180	152	156	225	161	169	319	207	150	322	515	312	278	210	111	228	467	164
6	ENSG00000172116	CD8b molecule	CD8B	112	202	0.9	ENSG00000172116	-0.582	-0.202	-0.971	-0.884	-0.113	-0.024	1.676	-0.08	-1.03	1.093	2.217	0.378	0.16	0.379	-1.118	0.767	3.215	0.024	ENSG00000172116	CD8B	112	202	0.9	0.5	118	149	87	94	156	163	301	159	82	253	344	196	178	196	75	227	425	167
6	ENSG00000127022	calnexin	CANX	83	135	0.7	ENSG00000127022	-1.463	-0.597	-1.151	-1.373	0.333	-0.536	0.156	-0.156	-0.266	-1.489	3.247	-0.43	1.611	1.843	2.436	0.439	0.494	0.752	ENSG00000127022	CANX	83	135	0.7	0.3	73	100	83	76	129	102	123	114	110	72	219	105	169	176	194	132	134	142
6	ENSG00000179218	calreticulin	CALR	198	279	0.5	ENSG00000179218	-1.001	-0.673	-0.845	-0.888	-1.024	-0.455	-0.032	0.032	0.669	-0.676	1.432	0.92	0.507	0.831	0.751	-0.308	0.082	0.047	ENSG00000179218	CALR	198	279	0.5	0.2	186	212	199	195	185	230	263	268	318	212	379	338	306	331	325	241	272	269
6	ENSG00000163131	cathepsin S	CTSS	88	230	1.4	ENSG00000163131	-0.915	-0.667	-1.179	-1.304	0.271	-0.737	-0.052	-0.032	-0.011	-0.943	0.682	0.129	1.015	0.836	6.981	0.011	0.405	0.386	ENSG00000163131	CTSS	88	230	1.4	0.8	96	117	74	63	196	111	169	170	172	94	230	184	258	243	759	174	207	205
6	ENSG00000109971	heat shock 70kDa protein 8	HSPA8	546	780	0.5	ENSG00000109971	-1.484	0.348	-1.205	-1.292	0.121	-0.854	0.015	-0.419	-0.475	-1.162	0.13	-0.652	-0.015	1.027	0.697	0.35	0.746	1.289	ENSG00000109971	HSPA8	546	780	0.5	0.3	393	878	467	444	818	560	790	675	660	478	820	613	782	1057	970	878	983	1126
6	ENSG00000216490	interferon, gamma-inducible protein 30	IFI30	11	64	2.5	ENSG00000216490	-0.128	-0.273	-0.685	-1.001	2.677	-0.664	-0.343	0.476	1.285	-0.867	0.128	0.969	7.907	2.141	16.407	-0.214	0.145	-0.45	ENSG00000216490	IFI30	11	64	2.5	1.6	19	16	8	2	71	9	15	30	45	5	24	39	169	61	328	17	24	13
6	ENSG00000134539	killer cell lectin-like receptor subfamily D, member 1	KLRD1	12	39	1.7	ENSG00000134539	-0.193	-1.078	-0.977	-1.069	-1.093	-0.783	-0.024	1.102	0.401	0.039	3.341	0.948	-0.131	0.024	0.962	0.488	0.566	-0.155	ENSG00000134539	KLRD1	12	39	1.7	0.7	25	7	9	7	7	13	29	52	38	30	99	49	27	30	49	40	41	26
6	ENSG00000204525	major histocompatibility complex, class I, C; major histocompatibility complex, class I, B	HLA-C	235	344	0.6	ENSG00000204525	1.856	1.224	-0.729	-0.171	-0.62	1.317	-0.602	-0.608	-0.126	-0.534	3.629	3.947	2.367	-0.243	-0.507	2.826	0.126	2.062	ENSG00000204525	HLA-C	235	344	0.6	1	470	357	6	106	25	373	29	28	114	41	789	846	562	93	46	644	159	507
6	ENSG00000196126	major histocompatibility complex, class II, DR beta 4; major histocompatibility complex, class II, DR beta 1	HLA-DRB1	32	60	0.9	ENSG00000196126	-0.25	0.307	2.986	0.101	-0.725	-0.101	-0.682	-0.461	3.524	1.378	6.414	-0.514	-0.595	1.407	13.821	4.071	-0.408	-0.667	ENSG00000196126	HLA-DRB1	32	60	0.9	1.5	10	22	77	17	0	13	1	6	89	44	149	5	3	45	303	100	7	1
6	ENSG00000198502	major histocompatibility complex, class II, DR beta 5	HLA-DRB5	12	47	2	ENSG00000198502	-0.674	2.754	9.162	-0.534	-0.674	1.152	-0.674	-0.337	16.834	6.464	21.499	-0.674	-0.674	0	88.133	19.364	0	-0.674	ENSG00000198502	HLA-DRB5	12	47	2	2.1	0	12	35	1	0	7	0	1	62	26	79	0	0	3	316	71	3	0
6	ENSG00000092010	proteasome (prosome, macropain) activator subunit 1 (PA28 alpha)	PSME1	254	405	0.7	ENSG00000092010	-0.94	-0.929	-1.395	-1.37	-0.524	-0.356	0.695	-0.217	0.372	-0.635	2.046	0.186	1.048	0.686	0.663	-0.186	1.435	0.255	ENSG00000092010	PSME1	254	405	0.7	0.2	276	277	230	232	318	335	441	349	408	306	577	389	476	440	438	352	515	396
6	ENSG00000100911	proteasome (prosome, macropain) activator subunit 2 (PA28 beta)	PSME2	131	296	1.2	ENSG00000100911	-0.786	-0.641	-0.956	-0.931	-0.594	-0.124	0.071	-0.015	0.746	-0.198	1.053	0.015	1.575	0.708	0.837	-0.304	1.128	0.214	ENSG00000100911	PSME2	131	296	1.2	0.4	137	157	113	117	164	229	256	244	350	219	392	248	465	344	362	204	403	276
6	ENSG00000064490	regulatory factor X-associated ankyrin-containing protein	RFXANK	23	30	0.4	ENSG00000064490	-1.804	0.712	-1.379	-2.031	-1.137	-1.091	-0.485	-0.243	0.712	-0.303	0.333	-0.121	0.333	0.834	0.637	0.121	0.773	0.258	ENSG00000064490	RFXANK	23	30	0.4	0.2	18	35	21	17	23	23	27	29	35	28	32	29	32	36	34	31	35	32
6	ENSG00000196735	similar to hCG2042724; similar to HLA class II histocompatibility antigen, DQ(1) alpha chain precursor (DC-4 alpha chain); major histocompatibility complex, class II, DQ alpha 1	HLA-DQA1	16	11	-0.6	ENSG00000196735	4.541	0.049	1.578	0.188	-0.674	-0.424	-0.661	-0.674	0.522	-0.049	4.276	-0.674	-0.661	2.037	5.18	3.817	-0.674	-0.674	ENSG00000196735	HLA-DQA1	16	11	-0.6	1.2	38	5	16	6	0	2	0	0	9	5	36	0	0	20	42	32	0	0
7	Glycolysis / Gluconeogenesis	GENE NAME	Symbol	avgCON	avgAFF	log(a/c)	ENSG	N048	N068	N090	N098	L005	L137	L101	L062	L149	L140	L031	L072	L133	L074	L078	L102	L115	L027	pureENSG	gene	avgCON	avgAFF	log(a/c)	CV	N048	N068	N090	N098	L005	L137	L101	L062	L149	L140	L031	L072	L133	L074	L078	L102	L115	L027
7	ENSG00000154930	acyl-CoA synthetase short-chain family member 1	ACSS1	16	23	0.5	ENSG00000154930	-1.879	-0.299	-1.513	-1.86	-2.245	-1.628	-0.935	-0.067	1.282	0.646	0.453	0.145	1.436	0.703	-0.568	0.318	0.087	0.067	ENSG00000154930	ACSS1	16	23	0.5	0.3	14	22	15	14	12	15	18	23	30	27	26	24	31	27	20	25	24	24
7	ENSG00000143149	aldehyde dehydrogenase 9 family, member A1	ALDH9A1	18	23	0.4	ENSG00000143149	-1.655	0.2	-1.022	-1.212	-0.748	-1.591	-0.601	0.263	0.116	-0.559	-0.116	-0.348	1.655	2.139	0.58	0.221	0.98	1.865	ENSG00000143149	ALDH9A1	18	23	0.4	0.2	14	23	17	16	19	15	19	23	23	20	22	21	30	32	25	23	27	31
7	ENSG00000117448	aldo-keto reductase family 1, member A1 (aldehyde reductase)	AKR1A1	33	47	0.5	ENSG00000117448	-0.893	-0.028	-1.526	-1.73	-0.791	-0.558	0.065	-0.065	0	0	1.209	0.047	1.6	1.023	1.033	0.428	1.07	-0.27	ENSG00000117448	AKR1A1	33	47	0.5	0.2	35	44	28	26	36	38	45	43	44	44	57	45	61	55	55	49	56	41
7	ENSG00000149925	aldolase A, fructose-bisphosphate	ALDOA	376	494	0.4	ENSG00000149925	-0.688	-0.148	-0.83	-0.835	-0.188	-0.157	0.309	-0.121	0.121	-0.661	1.111	0.263	1.294	1.388	2.804	-0.182	0.87	0.879	ENSG00000149925	ALDOA	376	494	0.4	0.2	370	426	355	354	422	425	474	429	454	372	558	469	577	586	734	422	532	533
7	ENSG00000074800	enolase 1, (alpha)	ENO1	246	458	0.9	ENSG00000074800	-1.632	-0.581	-1.434	-1.543	-0.407	-0.67	0.102	-0.664	0.248	-0.102	0.6	-0.267	1.142	1.422	1.244	0.679	1.117	0.879	ENSG00000074800	ENO1	246	458	0.9	0.3	202	340	228	213	363	328	429	329	449	403	495	381	566	603	580	505	563	532
7	ENSG00000108515	enolase 3 (beta, muscle)	ENO3	31	45	0.6	ENSG00000108515	-0.03	-0.674	-1.397	-0.744	-1.092	0.492	0.03	-0.509	-0.405	1.005	0.674	0.413	3.947	0.248	0.857	-0.762	2.493	-0.335	ENSG00000108515	ENO3	31	45	0.6	0.4	38	31	23	30	26	44	39	33	34	50	47	44	84	42	49	30	67	35
7	ENSG00000143891	galactose mutarotase (aldose 1-epimerase)	GALM	9	15	0.8	ENSG00000143891	-1.422	-0.073	-1.95	-1.452	-1.54	0.22	0.073	-0.103	1.422	-0.748	0.22	-0.073	4.414	0.337	2.067	-0.601	1.1	0.132	ENSG00000143891	GALM	9	15	0.8	0.4	8	13	6	8	8	14	13	12	18	10	14	13	28	14	20	11	17	13
7	ENSG00000105220	glucose phosphate isomerase	GPI	63	89	0.5	ENSG00000105220	-0.955	-0.019	-0.912	-1.202	-0.506	-0.402	0.201	-0.209	-0.363	-0.843	1.303	0.108	0.912	1.001	1.268	1.09	0.019	0.201	ENSG00000105220	GPI	63	89	0.5	0.2	59	83	60	52	70	73	89	78	74	62	117	86	107	109	116	112	84	89
7	ENSG00000111640	glyceraldehyde-3-phosphate dehydrogenase-like 6; hypothetical protein LOC100133042; glyceraldehyde-3-phosphate dehydrogenase	GAPDH	461	737	0.7	ENSG00000111640	-0.495	-0.805	-1.037	-0.896	0.007	-0.007	0.737	-0.764	-0.296	-1.141	1.935	0.158	2.895	0.612	1.716	0.453	0.202	-0.489	ENSG00000111640	GAPDH	461	737	0.7	0.4	533	462	408	441	649	645	817	471	579	384	1092	683	1313	788	1042	751	694	535
7	ENSG00000100889	phosphoenolpyruvate carboxykinase 2 (mitochondrial)	PCK2	7	12	0.8	ENSG00000100889	-1.445	-0.262	-0.647	-1.28	-0.537	-0.482	-0.206	0.702	0.785	0.206	0.482	-0.206	2.051	1.528	2.436	-0.509	1.253	0.922	ENSG00000100889	PCK2	7	12	0.8	0.3	5	9	8	5	8	8	9	13	13	11	12	9	18	16	19	8	15	13
7	ENSG00000067057	phosphofructokinase, platelet	PFKP	24	36	0.6	ENSG00000067057	-1.385	-0.525	-1.671	-0.609	-1.146	0	-0.585	0	1.385	1.349	-0.394	0.824	1.456	1.194	0.167	0.74	0.549	-0.215	ENSG00000067057	PFKP	24	36	0.6	0.2	22	29	19	28	24	33	28	33	45	44	30	40	45	43	35	39	38	31
7	ENSG00000171314	phosphoglycerate mutase 1 (brain)	PGAM1	63	100	0.7	ENSG00000171314	-0.75	-0.68	-1.018	-0.937	-0.299	-0.669	0.366	-0.506	0.232	-1.018	1.359	0.168	1.298	0.91	1.761	0.156	0.555	-0.156	ENSG00000171314	PGAM1	63	100	0.7	0.3	66	68	57	59	81	69	104	74	100	57	138	97	136	123	152	97	111	86
7	ENSG00000131828	pyruvate dehydrogenase (lipoamide) alpha 1	PDHA1	36	50	0.5	ENSG00000131828	-2.001	0.235	-1.788	-1.531	-1.877	-1.345	-1.46	0.244	0.448	0.04	-0.688	-0.138	2.019	0.661	0.865	0.058	0.191	-0.04	ENSG00000131828	PDHA1	36	50	0.5	0.3	28	53	30	33	29	35	34	53	55	51	43	49	73	58	60	51	52	50
7	ENSG00000067225	similar to Pyruvate kinase, isozymes M1/M2 (Pyruvate kinase muscle isozyme) (Cytosolic thyroid hormone-binding protein) (CTHBP) (THBP1); pyruvate kinase, muscle	PKM	172	240	0.5	ENSG00000067225	-1.545	0.304	-1.303	-1.554	-0.817	-0.745	-0.037	-0.041	0.217	-0.993	0.58	0.259	0.604	1.259	2.235	-0.116	0.037	0.752	ENSG00000067225	PKM	172	240	0.5	0.2	142	248	156	141	184	188	228	228	243	174	264	245	265	303	359	224	233	274
8	DNA replication	GENE NAME	Symbol	avgCON	avgAFF	log(a/c)	ENSG	N048	N068	N090	N098	L005	L137	L101	L062	L149	L140	L031	L072	L133	L074	L078	L102	L115	L027	pureENSG	gene	avgCON	avgAFF	log(a/c)	CV	N048	N068	N090	N098	L005	L137	L101	L062	L149	L140	L031	L072	L133	L074	L078	L102	L115	L027
8	ENSG00000112118	minichromosome maintenance complex component 3	MCM3	17	27	0.7	ENSG00000112118	-0.928	0.587	-0.865	-0.897	-0.674	-0.928	-0.317	0.357	0.833	-0.087	-0.103	0.087	2.523	0.913	0.801	0.674	-0.183	0.643	ENSG00000112118	MCM3	17	27	0.7	0.4	12	31	12	12	15	12	19	28	34	22	22	24	55	35	33	32	21	31
8	ENSG00000104738	minichromosome maintenance complex component 4	MCM4	8	15	0.9	ENSG00000104738	-0.143	0.272	-1.025	-0.246	-0.324	-0.48	-0.065	0.013	3.723	-0.013	1.959	0.065	11.479	2.555	2.867	1.258	-1.206	-0.869	ENSG00000104738	MCM4	8	15	0.9	0.8	9	10	5	8	8	8	9	9	24	9	17	10	54	19	20	14	5	6
8	ENSG00000100297	minichromosome maintenance complex component 5	MCM5	30	39	0.4	ENSG00000100297	-0.3	-0.869	-0.075	0.075	-0.555	-0.57	-0.36	0.525	1.169	-0.585	1.634	0.689	10.912	1.814	2.623	0.66	-1.394	-1.079	ENSG00000100297	MCM5	30	39	0.4	0.5	30	26	31	32	28	28	29	35	39	28	42	36	104	44	49	36	22	24
8	ENSG00000106628	polymerase (DNA directed), delta 2, regulatory subunit 50kDa	POLD2	27	36	0.4	ENSG00000106628	-1.391	1.114	-1.223	-1.849	-1.704	-0.283	-0.861	0.175	0.078	1.174	-0.078	-0.199	1.439	0.283	-0.295	0.114	1.512	0.488	ENSG00000106628	POLD2	27	36	0.4	0.2	23	44	24	19	20	32	27	36	35	44	34	33	46	37	32	35	47	38
8	ENSG00000175482	polymerase (DNA-directed), delta 4	POLD4	53	68	0.4	ENSG00000175482	-0.679	0.67	-0.759	-1.417	-0.63	-0.847	-0.614	-0.028	-0.044	0.63	-0.124	0.028	2.276	1.634	2.517	0.478	3.248	0.687	ENSG00000175482	POLD4	53	68	0.4	0.2	51	68	50	42	52	49	52	59	59	67	58	60	88	80	91	65	100	68
8	ENSG00000132646	proliferating cell nuclear antigen	PCNA	32	47	0.6	ENSG00000132646	-0.315	-0.704	-0.894	0.081	0.286	-0.499	-0.081	-0.227	1.129	-1.518	0.733	0.543	5.968	1.026	1.811	0.77	-0.645	-0.403	ENSG00000132646	PCNA	32	47	0.6	0.5	34	28	26	39	42	31	37	35	53	17	48	45	119	52	63	48	29	32
8	ENSG00000163918	replication factor C (activator 1) 4, 37kDa	RFC4	7	12	0.7	ENSG00000163918	-1.294	0.018	-1.586	-1.841	-1.768	-0.638	-0.93	0.565	0.966	-0.419	0.091	0.711	4.867	0.893	0.31	0.419	-0.237	-0.018	ENSG00000163918	RFC4	7	12	0.7	0.4	7	11	6	6	6	9	8	12	13	9	11	13	24	13	11	12	10	11
8	ENSG00000132383	replication protein A1, 70kDa	RPA1	38	56	0.6	ENSG00000132383	-1.422	0.213	-0.765	-1.231	-0.514	-1.141	-0.138	-0.043	0.048	-0.835	0.584	-0.323	0.043	1.081	1.081	0.93	0.113	1.196	ENSG00000132383	RPA1	38	56	0.6	0.3	26	58	39	30	44	31	51	53	55	38	66	48	55	76	76	73	56	78
8	ENSG00000117748	replication protein A2, 32kDa	RPA2	35	49	0.5	ENSG00000117748	-1.093	0.471	-0.642	-0.707	-0.78	-0.849	-0.313	0.114	-0.179	-0.918	-0.114	0.142	0.52	0.841	0.809	0.333	0.951	0.833	ENSG00000117748	RPA2	35	49	0.5	0.4	21	59	32	30	28	27	40	50	43	25	45	51	60	68	67	56	71	68
8	ENSG00000106399	replication protein A3, 14kDa	RPA3	20	26	0.3	ENSG00000106399	-0.769	-0.638	-0.783	0.116	-0.319	-0.522	-0.914	-0.711	-0.116	-1.117	0.435	0.45	2.321	1.349	0.798	0.276	1.218	0.58	ENSG00000106399	RPA3	20	26	0.3	0.3	18	19	18	25	22	20	17	19	23	16	27	27	40	33	29	26	32	28
8	ENSG00000136104	ribonuclease H2, subunit B	RNASEH2B	25	40	0.7	ENSG00000136104	-1.53	0.09	-1.002	-1.379	-1.176	-0.445	-0.475	-0.098	0.136	-0.874	0.309	-0.015	1.334	1.017	0.015	0.339	1.982	1.1	ENSG00000136104	RNASEH2B	25	40	0.7	0.3	17	39	24	19	22	31	31	36	39	26	41	37	55	51	38	42	64	52
8	ENSG00000172922	ribonuclease H2, subunit C	RNASEH2C	22	33	0.6	ENSG00000172922	-0.734	0.103	-1.724	-1.028	-0.93	-0.615	0.016	-0.212	-0.767	-0.016	1.354	0.103	2.225	1.18	-0.071	0.049	2.301	0.288	ENSG00000172922	RNASEH2C	22	33	0.6	0.3	23	31	14	21	22	24	30	28	23	30	43	31	51	41	29	31	51	33
8	ENSG00000106028	single-stranded DNA binding protein 1	SSBP1	66	94	0.5	ENSG00000106028	-1.553	0.012	-1.468	-1.74	-1.426	0.185	-0.471	-0.208	-0.227	-0.878	0.391	0.124	1.108	0.967	0.358	-0.012	1.567	0.93	ENSG00000106028	SSBP1	66	94	0.5	0.2	58	91	60	54	61	95	81	87	86	72	99	94	115	112	99	91	124	111
9	Glutathione Metabolism	GENE NAME	Symbol	avgCON	avgAFF	log(a/c)	ENSG	N048	N068	N090	N098	L005	L137	L101	L062	L149	L140	L031	L072	L133	L074	L078	L102	L115	L027	pureENSG	gene	avgCON	avgAFF	log(a/c)	CV	N048	N068	N090	N098	L005	L137	L101	L062	L149	L140	L031	L072	L133	L074	L078	L102	L115	L027
9	ENSG00000006625	gamma-glutamyl cyclotransferase	GGCT	9	16	0.8	ENSG00000006625	-1.104	-0.102	-1.451	-1.349	-0.92	-0.327	-0.225	-0.286	0.102	-0.429	0.123	0.123	2.841	0.92	0.593	0.756	1.042	1.022	ENSG00000006625	GGCT	9	16	0.8	0.3	9	13	7	7	9	12	13	13	14	12	15	15	28	18	17	18	19	19
9	ENSG00000148834	glutathione S-transferase omega 1	GSTO1	30	50	0.7	ENSG00000148834	-0.757	-0.201	-0.889	-0.706	-0.218	-0.643	0.201	-0.244	-0.257	-0.787	0.214	0.477	0.825	1.771	1.186	0.494	0.791	0.817	ENSG00000148834	GSTO1	30	50	0.7	0.4	27	40	24	28	40	30	50	39	39	26	50	56	64	87	73	57	64	64
9	ENSG00000084207	glutathione S-transferase pi 1	GSTP1	82	123	0.6	ENSG00000084207	-0.058	-0.474	-1.285	-0.659	0.058	-0.781	0.437	-0.562	-0.311	-0.374	2.54	0.69	1.682	0.818	2.759	0.728	1.46	-0.108	ENSG00000084207	GSTP1	82	123	0.6	0.3	100	87	61	81	104	77	116	84	92	90	183	124	156	128	190	125	149	99
9	ENSG00000104687	glutathione reductase	GSR	13	19	0.6	ENSG00000104687	-0.984	-0.565	-0.365	-0.784	-0.529	-0.82	-0.055	0.401	1.495	-0.893	0.018	-0.018	1.24	1.021	2.425	0.857	0.128	0.547	ENSG00000104687	GSR	13	19	0.6	0.3	11	13	14	12	14	12	16	19	25	12	17	16	23	22	30	21	17	19
9	ENSG00000182054	isocitrate dehydrogenase 2 (NADP+), mitochondrial	IDH2	39	76	1	ENSG00000182054	-0.699	-0.699	-1.369	-1.104	-0.528	-0.456	0.65	0.074	0.578	-0.578	2.691	0.618	3.707	1.72	1.751	-0.074	1.477	-0.497	ENSG00000182054	IDH2	39	76	1	0.4	45	45	30	36	48	50	75	62	73	47	120	74	143	98	99	59	93	49
9	ENSG00000002549	leucine aminopeptidase 3	LAP3	13	27	1	ENSG00000002549	-0.729	-0.927	-0.532	-0.795	-0.664	-0.126	0.071	0.642	2.155	-0.071	1.694	-0.532	3.811	2.374	2.276	-0.685	0.598	0.433	ENSG00000002549	LAP3	13	27	1	0.5	13	12	15	13	14	19	21	26	40	19	35	15	55	42	41	14	25	24
9	ENSG00000143198	microsomal glutathione S-transferase 3	MGST3	31	42	0.4	ENSG00000143198	0.027	-0.038	-1.365	-0.598	-0.707	0.521	-0.027	-0.192	-0.335	-1.42	1.486	2.023	-0.642	1.738	1.716	0.093	4.074	1.552	ENSG00000143198	MGST3	31	42	0.4	0.3	36	36	23	30	29	41	36	34	33	23	49	54	30	52	52	37	73	50
9	ENSG00000142657	phosphogluconate dehydrogenase	PGD	23	33	0.5	ENSG00000142657	-1.234	-0.144	-0.703	-0.861	-0.431	-0.918	-0.617	0.072	-0.072	-1.033	0.23	0.646	1.435	0.861	2.841	4.808	0.359	0.445	ENSG00000142657	PGD	23	33	0.5	0.3	19	27	23	22	25	21	24	28	27	21	29	32	38	34	48	61	30	31
9	ENSG00000171848	ribonucleotide reductase M2 polypeptide	RRM2	5	25	2.2	ENSG00000171848	-0.056	-0.725	-0.68	-0.401	-0.29	-0.089	0.301	0.056	1.717	-0.546	3.501	0.881	13.78	2.809	2.776	0.346	-0.992	-0.669	ENSG00000171848	RRM2	5	25	2.2	1.5	9	3	4	6	7	9	12	10	25	5	41	18	133	35	35	13	1	4
9	ENSG00000116649	spermidine synthase	SRM	35	52	0.6	ENSG00000116649	-1.208	-0.246	-1.7	-1.797	-0.844	-0.521	0.392	-0.86	-0.529	0.053	1.587	0.246	1.127	1.345	0.109	-0.053	0.82	0.335	ENSG00000116649	SRM	35	52	0.6	0.2	35	47	29	28	40	44	55	40	44	51	70	53	64	67	52	50	60	54
9	ENSG00000102172	spermine synthase; similar to spermine synthase	SMS	15	25	0.7	ENSG00000102172	-0.951	-0.64	-0.963	-0.709	-0.317	-0.11	0.04	-0.236	0.156	-0.963	0.882	0.329	1.147	1.02	1.205	-0.04	1.055	0.398	ENSG00000102172	SMS	15	25	0.7	0.3	14	17	14	16	19	21	22	20	23	14	30	25	32	31	33	22	31	26
9	ENSG00000117862	thioredoxin domain containing 12 (endoplasmic reticulum)	TXNDC12	23	32	0.5	ENSG00000117862	-0.76	-0.214	-1.049	-0.91	-0.589	-0.407	0.525	-0.107	-0.343	-0.792	0.942	0.171	0.589	0.91	0.76	0.107	1.488	0.782	ENSG00000117862	TXNDC12	23	32	0.5	0.2	23	28	20	21	24	26	35	29	27	22	39	31	35	38	37	31	44	37
10	N-Glycan biosynthesis	GENE NAME	Symbol	avgCON	avgAFF	log(a/c)	ENSG	N048	N068	N090	N098	L005	L137	L101	L062	L149	L140	L031	L072	L133	L074	L078	L102	L115	L027	pureENSG	gene	avgCON	avgAFF	log(a/c)	CV	N048	N068	N090	N098	L005	L137	L101	L062	L149	L140	L031	L072	L133	L074	L078	L102	L115	L027
10	ENSG00000073849	ST6 beta-galactosamide alpha-2,6-sialyltranferase 1	ST6GAL1	62	75	0.3	ENSG00000073849	-0.961	2.128	-1.625	-2.106	-1.801	-1.502	-0.543	0.672	0.12	-0.65	0.34	-0.083	0.458	1.684	0.083	0.677	-0.201	2.54	ENSG00000073849	ST6GAL1	62	75	0.3	0.3	56	113	43	34	40	45	63	86	76	61	80	72	82	105	75	86	70	121
10	ENSG00000134910	STT3, subunit of the oligosaccharyltransferase complex, homolog A (S. cerevisiae)	STT3A	14	20	0.5	ENSG00000134910	-0.894	0.674	-0.645	-0.572	-1.349	-0.88	-1.305	0.015	0.279	-0.66	2.669	0.674	4.106	2.918	1.73	0.367	-0.015	-0.147	ENSG00000134910	STT3A	14	20	0.5	0.5	10	21	12	12	7	10	7	16	18	12	34	21	44	36	28	19	16	15
10	ENSG00000033011	asparagine-linked glycosylation 1, beta-1,4-mannosyltransferase homolog (S. cerevisiae)	ALG1	11	14	0.4	ENSG00000033011	-0.694	-0.039	-1.503	-1.388	-0.655	-1.657	-0.54	0.501	0.463	-1.233	1.811	0.347	3.546	1.58	0.964	-0.116	0.308	0.039	ENSG00000033011	ALG1	11	14	0.4	0.3	11	13	9	9	11	9	12	14	14	10	18	14	22	17	15	13	14	13
10	ENSG00000159063	asparagine-linked glycosylation 8, alpha-1,3-glucosyltransferase homolog (S. cerevisiae)	ALG8	9	12	0.5	ENSG00000159063	-1.456	-0.077	-1.15	-1.61	-1.272	-0.72	-0.383	0.077	0.23	-1.364	1.027	0.077	0.874	1.058	0.199	-0.475	0.598	0.629	ENSG00000159063	ALG8	9	12	0.5	0.2	7	12	8	7	8	10	11	12	13	8	16	12	15	16	13	11	14	14
10	ENSG00000129562	defender against cell death 1	DAD1	88	148	0.8	ENSG00000129562	-0.802	-0.083	-1.325	-1.352	-0.973	-0.136	0.212	-0.017	-0.801	-0.786	0.964	0.404	0.513	0.84	0.499	0.017	1.887	0.563	ENSG00000129562	DAD1	88	148	0.8	0.3	93	133	63	62	83	130	150	137	93	94	192	161	167	185	166	139	244	170
10	ENSG00000136908	dolichyl-phosphate mannosyltransferase polypeptide 2, regulatory subunit	DPM2	12	17	0.6	ENSG00000136908	-1.589	0.354	-1.338	-1.818	-1.612	-0.469	-0.492	0.354	-0.149	-0.4	0.835	0.514	0.995	1.132	1.132	0.034	1.017	-0.034	ENSG00000136908	DPM2	12	17	0.6	0.3	10	18	11	9	10	15	14	18	16	15	20	19	21	22	22	17	21	16
10	ENSG00000089597	glucosidase, alpha; neutral AB	GANAB	89	100	0.2	ENSG00000089597	-1.898	0.741	-0.441	-0.991	-1.83	-1.825	-0.957	0.324	-0.034	0.162	1.187	-0.456	0.034	1.486	0.77	0.255	-0.368	0.608	ENSG00000089597	GANAB	89	100	0.2	0.2	63	117	93	82	65	65	82	109	101	105	126	93	103	132	118	107	94	114
10	ENSG00000111885	mannosidase, alpha, class 1A, member 1	MAN1A1	9	17	1	ENSG00000111885	-0.444	-0.809	-0.667	-1.016	-0.778	-0.746	0.413	0.079	0.175	-0.46	3.983	0.682	2.381	1.984	1.73	0.508	-0.46	-0.079	ENSG00000111885	MAN1A1	9	17	1	0.5	11	8	9	7	8	9	16	14	14	10	38	18	28	26	24	17	10	13
10	ENSG00000131446	mannosyl (alpha-1,3-)-glycoprotein beta-1,2-N-acetylglucosaminyltransferase	MGAT1	56	67	0.3	ENSG00000131446	-1.335	1.13	-0.692	-1.109	-0.452	-0.767	0.089	-0.452	-0.383	-0.089	0.418	-0.5	1.411	1.37	1.76	0.657	0.342	1.472	ENSG00000131446	MGAT1	56	67	0.3	0.2	43	79	53	47	56	52	64	56	57	62	69	56	84	83	89	73	68	84
10	ENSG00000163902	ribophorin I	RPN1	53	70	0.4	ENSG00000163902	-0.521	-0.545	-0.975	-0.692	-0.009	-1.37	-0.462	-0.657	0.009	-1.835	1.694	0.156	1.758	2.613	2.053	0.027	1.152	0.356	ENSG00000163902	RPN1	53	70	0.4	0.3	56	56	48	53	65	42	57	54	65	34	94	68	95	109	100	65	84	71
10	ENSG00000118705	ribophorin II	RPN2	85	111	0.4	ENSG00000118705	-0.259	-0.211	-0.852	-0.778	-0.422	-0.022	0.856	-0.315	0.022	-0.812	2.398	0.838	1.753	1.883	1.108	-0.17	0.571	0.419	ENSG00000118705	RPN2	85	111	0.4	0.2	92	93	76	78	88	98	122	90	100	77	164	122	146	150	129	94	114	110
11	Aminoacyl tRNA Biosynth	GENE NAME	Symbol	avgCON	avgAFF	log(a/c)	ENSG	N048	N068	N090	N098	L005	L137	L101	L062	L149	L140	L031	L072	L133	L074	L078	L102	L115	L027	pureENSG	gene	avgCON	avgAFF	log(a/c)	CV	N048	N068	N090	N098	L005	L137	L101	L062	L149	L140	L031	L072	L133	L074	L078	L102	L115	L027
11	ENSG00000090861	alanyl-tRNA synthetase	AARS	12	19	0.6	ENSG00000090861	-1.145	0.705	-1.083	-1.104	-1.226	-1.053	-0.981	0.45	0.583	0.245	-0.286	0.184	0.685	0.971	-0.02	-0.184	0.02	0.664	ENSG00000090861	AARS	12	19	0.6	0.4	8	26	8	8	7	9	9	23	25	21	16	21	26	28	19	17	19	25
11	ENSG00000115866	aspartyl-tRNA synthetase	DARS	38	54	0.5	ENSG00000115866	-1.805	-0.14	-1.489	-0.986	0.251	-0.651	-0.809	-0.391	-0.447	0.307	0.698	-0.53	0.344	1.033	0.14	2.14	1.703	1.535	ENSG00000115866	DARS	38	54	0.5	0.2	30	48	34	39	52	43	41	45	45	53	57	44	53	61	51	73	68	66
11	ENSG00000136628	glutamyl-prolyl-tRNA synthetase	EPRS	23	30	0.4	ENSG00000136628	-1.355	0.697	-1.151	-1.105	-0.618	-0.845	-0.074	0.357	0.051	-1.015	0.006	-0.006	0.391	1.298	0.686	0.663	-0.459	1.434	ENSG00000136628	EPRS	23	30	0.4	0.3	17	35	19	19	24	22	28	32	30	20	29	29	33	41	35	35	25	42
11	ENSG00000196305	isoleucyl-tRNA synthetase	IARS	11	15	0.3	ENSG00000196305	-1.499	0.416	-0.133	-0.616	-1.682	-1.083	-1.132	0.883	1.449	1.232	-0.916	-0.017	0.3	0.683	0.017	0.133	-0.266	0.666	ENSG00000196305	IARS	11	15	0.3	0.4	5	17	13	10	4	8	7	19	23	22	9	14	16	18	14	15	13	18
11	ENSG00000067704	isoleucyl-tRNA synthetase 2, mitochondrial	IARS2	21	31	0.6	ENSG00000067704	-2.055	0.456	-1.58	-1.655	-0.706	-1.243	0.244	-0.019	-0.081	-1.18	0.019	0.418	-0.294	1.03	1.23	0.643	0.294	1.343	ENSG00000067704	IARS2	21	31	0.6	0.3	14	34	18	17	25	20	32	30	30	21	30	34	28	39	40	35	33	41
11	ENSG00000133706	leucyl-tRNA synthetase	LARS	21	32	0.6	ENSG00000133706	-2.012	0.512	-1.314	-1.64	-1.558	-0.744	-0.605	1.07	1.058	0.419	-0.442	0.256	-0.465	0.802	-0.256	0.57	0.279	1.465	ENSG00000133706	LARS	21	32	0.6	0.3	13	35	19	17	17	24	26	40	40	34	27	33	27	38	29	36	33	43
11	ENSG00000179115	phenylalanyl-tRNA synthetase, alpha subunit	FARSA	14	18	0.4	ENSG00000179115	-1.49	0.624	-0.846	-0.725	-0.725	-1.369	-1.53	-0.201	0.201	0.342	-0.604	-0.342	2.174	1.53	0.443	0.282	0.403	1.852	ENSG00000179115	FARSA	14	18	0.4	0.3	10	20	13	13	13	10	9	16	18	19	14	15	28	25	19	18	19	26
11	ENSG00000116120	phenylalanyl-tRNA synthetase, beta subunit	FARSB	9	12	0.4	ENSG00000116120	-1.119	0.89	-0.718	-0.689	-0.631	-0.832	-0.66	0.258	0.086	-0.545	-0.258	-0.086	1.579	1.952	0.631	0.316	1.119	2.009	ENSG00000116120	FARSB	9	12	0.4	0.3	7	14	8	8	8	8	8	11	11	9	10	10	16	17	13	12	14	17
11	ENSG00000113407	threonyl-tRNA synthetase	TARS	15	19	0.3	ENSG00000113407	-0.899	0.707	-0.739	-0.626	0.048	-0.642	-0.739	0.305	0.385	-0.739	-0.064	-0.064	1.237	1.863	0.771	-0.048	0.08	1.799	ENSG00000113407	TARS	15	19	0.3	0.3	12	22	13	14	18	14	13	20	20	13	17	17	26	29	23	18	18	29
11	ENSG00000140105	tryptophanyl-tRNA synthetase	WARS	21	74	1.8	ENSG00000140105	-0.753	-0.39	-0.953	-1.002	0.526	-0.721	-0.293	0.471	1.322	-0.553	2.4	0.628	8.251	2.053	13.251	-0.433	-0.433	0.293	ENSG00000140105	WARS	21	74	1.8	1.1	21	28	18	17	45	22	30	44	60	25	79	47	187	73	280	27	27	41
11	ENSG00000134684	tyrosyl-tRNA synthetase	YARS	25	34	0.5	ENSG00000134684	-1.154	-0.302	-0.186	-0.484	-0.997	-0.79	-0.807	0.699	2.081	1.188	0.294	-0.153	0.65	0.741	0.153	-0.732	0.277	0.178	ENSG00000134684	YARS	25	34	0.5	0.3	17	28	29	25	19	22	22	40	56	46	35	29	39	40	33	22	35	33
12	Pyruvate Metabolism	GENE NAME	Symbol	avgCON	avgAFF	log(a/c)	ENSG	N048	N068	N090	N098	L005	L137	L101	L062	L149	L140	L031	L072	L133	L074	L078	L102	L115	L027	pureENSG	gene	avgCON	avgAFF	log(a/c)	CV	N048	N068	N090	N098	L005	L137	L101	L062	L149	L140	L031	L072	L133	L074	L078	L102	L115	L027
12	ENSG00000075239	acetyl-Coenzyme A acetyltransferase 1	ACAT1	10	15	0.7	ENSG00000075239	-1.708	-0.228	-1.469	-0.925	-0.359	-0.99	0.228	-0.272	0.163	-1.033	0.838	0.62	0.62	0.729	1.012	0.315	-0.163	1.251	ENSG00000075239	ACAT1	10	15	0.7	0.3	7	13	8	10	13	10	16	13	15	10	18	17	17	18	19	16	14	20
12	ENSG00000154930	acyl-CoA synthetase short-chain family member 1	ACSS1	16	23	0.5	ENSG00000154930	-1.879	-0.299	-1.513	-1.86	-2.245	-1.628	-0.935	-0.067	1.282	0.646	0.453	0.145	1.436	0.703	-0.568	0.318	0.087	0.067	ENSG00000154930	ACSS1	16	23	0.5	0.3	14	22	15	14	12	15	18	23	30	27	26	24	31	27	20	25	24	24
12	ENSG00000143149	aldehyde dehydrogenase 9 family, member A1	ALDH9A1	18	23	0.4	ENSG00000143149	-1.655	0.2	-1.022	-1.212	-0.748	-1.591	-0.601	0.263	0.116	-0.559	-0.116	-0.348	1.655	2.139	0.58	0.221	0.98	1.865	ENSG00000143149	ALDH9A1	18	23	0.4	0.2	14	23	17	16	19	15	19	23	23	20	22	21	30	32	25	23	27	31
12	ENSG00000137106	glyoxylate reductase/hydroxypyruvate reductase	GRHPR	22	33	0.6	ENSG00000137106	-1.323	-0.088	-0.41	-1.313	-0.866	-0.524	0.254	-0.617	0.856	-0.732	0.96	-0.14	0.97	0.285	0.088	1.126	0.192	2.392	ENSG00000137106	GRHPR	22	33	0.6	0.3	17	29	26	17	22	25	32	24	38	23	39	29	39	33	31	41	32	53
12	ENSG00000014641	malate dehydrogenase 1, NAD (soluble)	MDH1	53	70	0.4	ENSG00000014641	-1.135	-0.175	-0.718	-0.684	-0.703	-0.665	0.026	-0.122	0.449	-1.006	0.295	0.223	0.881	1.126	0.742	-0.026	0.943	0.641	ENSG00000014641	MDH1	53	70	0.4	0.2	43	63	52	53	52	53	67	64	76	46	73	71	85	90	82	66	86	80
12	ENSG00000082212	malic enzyme 2, NAD(+)-dependent, mitochondrial	ME2	15	26	0.8	ENSG00000082212	-1.82	-0.283	-1.835	-1.951	-1.226	-0.834	-0.007	0.587	0.471	-0.616	0.384	0.007	0.733	1.066	1.501	-0.196	0.834	0.515	ENSG00000082212	ME2	15	26	0.8	0.3	12	23	12	11	16	19	25	29	28	20	27	25	30	32	35	23	30	28
12	ENSG00000100889	phosphoenolpyruvate carboxykinase 2 (mitochondrial)	PCK2	7	12	0.8	ENSG00000100889	-1.445	-0.262	-0.647	-1.28	-0.537	-0.482	-0.206	0.702	0.785	0.206	0.482	-0.206	2.051	1.528	2.436	-0.509	1.253	0.922	ENSG00000100889	PCK2	7	12	0.8	0.3	5	9	8	5	8	8	9	13	13	11	12	9	18	16	19	8	15	13
12	ENSG00000131828	pyruvate dehydrogenase (lipoamide) alpha 1	PDHA1	36	50	0.5	ENSG00000131828	-2.001	0.235	-1.788	-1.531	-1.877	-1.345	-1.46	0.244	0.448	0.04	-0.688	-0.138	2.019	0.661	0.865	0.058	0.191	-0.04	ENSG00000131828	PDHA1	36	50	0.5	0.3	28	53	30	33	29	35	34	53	55	51	43	49	73	58	60	51	52	50
12	ENSG00000067225	similar to Pyruvate kinase, isozymes M1/M2 (Pyruvate kinase muscle isozyme) (Cytosolic thyroid hormone-binding protein) (CTHBP) (THBP1); pyruvate kinase, muscle	PKM	172	240	0.5	ENSG00000067225	-1.545	0.304	-1.303	-1.554	-0.817	-0.745	-0.037	-0.041	0.217	-0.993	0.58	0.259	0.604	1.259	2.235	-0.116	0.037	0.752	ENSG00000067225	PKM	172	240	0.5	0.2	142	248	156	141	184	188	228	228	243	174	264	245	265	303	359	224	233	274
13	Fatty Acid Metabolism	GENE NAME	Symbol	avgCON	avgAFF	log(a/c)	ENSG	N048	N068	N090	N098	L005	L137	L101	L062	L149	L140	L031	L072	L133	L074	L078	L102	L115	L027	pureENSG	gene	avgCON	avgAFF	log(a/c)	CV	N048	N068	N090	N098	L005	L137	L101	L062	L149	L140	L031	L072	L133	L074	L078	L102	L115	L027
13	ENSG00000075239	acetyl-Coenzyme A acetyltransferase 1	ACAT1	10	15	0.7	ENSG00000075239	-1.708	-0.228	-1.469	-0.925	-0.359	-0.99	0.228	-0.272	0.163	-1.033	0.838	0.62	0.62	0.729	1.012	0.315	-0.163	1.251	ENSG00000075239	ACAT1	10	15	0.7	0.3	7	13	8	10	13	10	16	13	15	10	18	17	17	18	19	16	14	20
13	ENSG00000197142	acyl-CoA synthetase long-chain family member 5	ACSL5	16	24	0.6	ENSG00000197142	-1.3	-0.184	-0.742	-0.949	-0.985	-0.751	-0.562	0.706	0.985	0.112	-2.226	-0.022	0.022	0.895	0.643	0.058	0.184	0.355	ENSG00000197142	ACSL5	16	24	0.6	0.4	10	23	17	14	14	17	19	33	36	26	0	25	25	35	32	26	27	29
13	ENSG00000117054	acyl-Coenzyme A dehydrogenase, C-4 to C-12 straight chain	ACADM	12	20	0.8	ENSG00000117054	-0.957	-0.011	-1.077	-1.088	-0.816	-0.674	-0.664	0.022	-0.141	-0.674	0.152	0.011	1.044	1.251	0.12	0.587	1.131	1.066	ENSG00000117054	ACADM	12	20	0.8	0.4	10	19	9	9	11	13	13	19	18	13	20	19	29	30	20	24	29	29
13	ENSG00000143149	aldehyde dehydrogenase 9 family, member A1	ALDH9A1	18	23	0.4	ENSG00000143149	-1.655	0.2	-1.022	-1.212	-0.748	-1.591	-0.601	0.263	0.116	-0.559	-0.116	-0.348	1.655	2.139	0.58	0.221	0.98	1.865	ENSG00000143149	ALDH9A1	18	23	0.4	0.2	14	23	17	16	19	15	19	23	23	20	22	21	30	32	25	23	27	31
13	ENSG00000127884	enoyl Coenzyme A hydratase, short chain, 1, mitochondrial	ECHS1	16	25	0.6	ENSG00000127884	-1.219	0.13	-1.195	-1.254	-0.603	-0.722	-0.106	-0.071	-0.438	-0.757	0.958	0.26	0.627	0.994	0.615	0.071	0.757	0.97	ENSG00000127884	ECHS1	16	25	0.6	0.3	13	25	14	13	19	18	23	23	20	17	32	26	29	32	29	24	30	32
13	ENSG00000138796	hydroxyacyl-Coenzyme A dehydrogenase	HADH	8	13	0.6	ENSG00000138796	-1.741	0.662	-1.447	-1.3	-1.3	-1.275	-0.981	0.294	0.417	0.049	-0.441	-0.049	1.496	0.54	0.687	0.957	-0.098	0.491	ENSG00000138796	HADH	8	13	0.6	0.3	5	15	6	7	7	7	8	13	14	12	10	12	18	14	15	16	12	14
13	ENSG00000138029	hydroxyacyl-Coenzyme A dehydrogenase/3-ketoacyl-Coenzyme A thiolase/enoyl-Coenzyme A hydratase (trifunctional protein), beta subunit	HADHB	22	31	0.5	ENSG00000138029	-1.366	0.084	-0.916	-1.321	-0.781	-1.04	-0.736	-0.242	0.399	-0.467	0.118	-0.084	0.534	1.49	1.276	0.511	0.68	0.669	ENSG00000138029	HADHB	22	31	0.5	0.2	18	31	22	19	23	21	24	28	34	26	31	30	35	44	42	35	36	36
13	ENSG00000167315	hypothetical LOC648603; acetyl-Coenzyme A acyltransferase 2	ACAA2	15	27	0.9	ENSG00000167315	-0.719	-0.18	-0.801	-0.769	0.008	-0.008	-0.253	0.204	-0.123	-0.94	1.046	0.213	1.21	1.316	1.782	0.63	0.883	-0.311	ENSG00000167315	ACAA2	15	27	0.9	0.4	14	20	13	13	23	22	19	25	21	11	35	25	37	39	44	30	33	19
13	ENSG00000198721	peroxisomal D3,D2-enoyl-CoA isomerase	ECI2	13	15	0.2	ENSG00000198721	-1.161	0.645	-0.327	-0.704	-0.922	-1.438	-0.962	0.01	0.03	-0.089	-0.724	0.109	0.387	1.22	-0.01	0.803	0.169	1.478	ENSG00000198721	ECI2	13	15	0.2	0.3	9	18	13	11	10	8	10	15	15	14	11	15	17	21	15	19	16	22
14	TCA Cycle	GENE NAME	Symbol	avgCON	avgAFF	log(a/c)	ENSG	N048	N068	N090	N098	L005	L137	L101	L062	L149	L140	L031	L072	L133	L074	L078	L102	L115	L027	pureENSG	gene	avgCON	avgAFF	log(a/c)	CV	N048	N068	N090	N098	L005	L137	L101	L062	L149	L140	L031	L072	L133	L074	L078	L102	L115	L027
14	ENSG00000091483	fumarate hydratase	FH	11	16	0.5	ENSG00000091483	-1.104	0.123	-1.206	-1.185	-0.613	-0.94	-0.47	0.02	-0.02	-0.756	0.45	0.429	2.289	1.104	0.818	0.184	-0.061	0.736	ENSG00000091483	FH	11	16	0.5	0.3	10	16	9	10	12	11	13	15	15	12	18	17	27	21	19	16	15	19
14	ENSG00000182054	isocitrate dehydrogenase 2 (NADP+), mitochondrial	IDH2	39	76	1	ENSG00000182054	-0.699	-0.699	-1.369	-1.104	-0.528	-0.456	0.65	0.074	0.578	-0.578	2.691	0.618	3.707	1.72	1.751	-0.074	1.477	-0.497	ENSG00000182054	IDH2	39	76	1	0.4	45	45	30	36	48	50	75	62	73	47	120	74	143	98	99	59	93	49
14	ENSG00000014641	malate dehydrogenase 1, NAD (soluble)	MDH1	53	70	0.4	ENSG00000014641	-1.135	-0.175	-0.718	-0.684	-0.703	-0.665	0.026	-0.122	0.449	-1.006	0.295	0.223	0.881	1.126	0.742	-0.026	0.943	0.641	ENSG00000014641	MDH1	53	70	0.4	0.2	43	63	52	53	52	53	67	64	76	46	73	71	85	90	82	66	86	80
14	ENSG00000105953	oxoglutarate (alpha-ketoglutarate) dehydrogenase (lipoamide)	OGDH	32	43	0.4	ENSG00000105953	-0.851	-0.169	-0.596	-0.498	-0.292	-0.909	0.021	-0.103	1.024	-1.23	0.901	0.753	0.999	1.633	2.941	-0.021	0.292	0.366	ENSG00000105953	OGDH	32	43	0.4	0.3	28	37	31	33	35	28	39	37	51	24	50	48	51	59	74	38	42	43
14	ENSG00000100889	phosphoenolpyruvate carboxykinase 2 (mitochondrial)	PCK2	7	12	0.8	ENSG00000100889	-1.445	-0.262	-0.647	-1.28	-0.537	-0.482	-0.206	0.702	0.785	0.206	0.482	-0.206	2.051	1.528	2.436	-0.509	1.253	0.922	ENSG00000100889	PCK2	7	12	0.8	0.3	5	9	8	5	8	8	9	13	13	11	12	9	18	16	19	8	15	13
14	ENSG00000131828	pyruvate dehydrogenase (lipoamide) alpha 1	PDHA1	36	50	0.5	ENSG00000131828	-2.001	0.235	-1.788	-1.531	-1.877	-1.345	-1.46	0.244	0.448	0.04	-0.688	-0.138	2.019	0.661	0.865	0.058	0.191	-0.04	ENSG00000131828	PDHA1	36	50	0.5	0.3	28	53	30	33	29	35	34	53	55	51	43	49	73	58	60	51	52	50
14	ENSG00000204370	similar to succinate dehydrogenase complex, subunit D, integral membrane protein; succinate dehydrogenase complex, subunit D, integral membrane protein	SDHD	42	55	0.4	ENSG00000204370	-1.199	0.017	-0.698	-0.651	-0.017	-0.918	0.444	-0.217	-0.21	-1.212	0.918	-0.144	0.204	1.66	0.985	0.738	0.618	1.539	ENSG00000204370	SDHD	42	55	0.4	0.2	34	52	41	42	52	38	58	49	49	34	66	50	55	77	67	63	61	75
14	ENSG00000143252	succinate dehydrogenase complex, subunit C, integral membrane protein, 15kDa	SDHC	49	62	0.3	ENSG00000143252	-0.902	-0.126	-1.132	-1.097	-0.608	-0.986	0.685	-0.391	-0.475	-1.16	1.482	0.126	0.601	1.23	0.762	0.664	0.377	0.496	ENSG00000143252	SDHC	49	62	0.3	0.2	48	59	45	45	52	47	71	55	54	44	82	63	69	78	72	70	66	68
14	ENSG00000163541	succinate-CoA ligase, alpha subunit	SUCLG1	20	32	0.7	ENSG00000163541	-1.503	0.26	-1.416	-1.301	-1.176	-0.78	-0.414	0.52	-0.029	-0.472	-0.183	0.029	1.696	1.156	0.424	0.578	0.829	0.771	ENSG00000163541	SUCLG1	20	32	0.7	0.3	15	33	16	17	18	22	26	36	30	25	28	31	48	42	35	36	39	38
15	Pentose Phosphate	GENE NAME	Symbol	avgCON	avgAFF	log(a/c)	ENSG	N048	N068	N090	N098	L005	L137	L101	L062	L149	L140	L031	L072	L133	L074	L078	L102	L115	L027	pureENSG	gene	avgCON	avgAFF	log(a/c)	CV	N048	N068	N090	N098	L005	L137	L101	L062	L149	L140	L031	L072	L133	L074	L078	L102	L115	L027
15	ENSG00000023697	2-deoxyribose-5-phosphate aldolase homolog (C. elegans)	DERA	10	13	0.4	ENSG00000023697	-0.995	-0.051	-1.062	-0.961	-0.388	-0.219	-0.32	0.793	-0.388	-1.062	0.894	0.152	1.973	1.568	1.905	0.556	0.051	0.219	ENSG00000023697	DERA	10	13	0.4	0.2	9	12	9	9	11	11	11	14	11	9	15	12	18	17	18	14	12	13
15	ENSG00000130313	6-phosphogluconolactonase	PGLS	36	51	0.5	ENSG00000130313	-1.015	0.247	-0.902	-1.122	-0.093	-0.427	-0.04	-0.708	-0.534	-0.574	1.175	0.314	0.735	0.781	1.943	0.04	0.942	0.641	ENSG00000130313	PGLS	36	51	0.5	0.3	31	50	33	30	45	40	46	36	38	38	64	51	57	58	76	47	61	56
15	ENSG00000149925	aldolase A, fructose-bisphosphate	ALDOA	376	494	0.4	ENSG00000149925	-0.688	-0.148	-0.83	-0.835	-0.188	-0.157	0.309	-0.121	0.121	-0.661	1.111	0.263	1.294	1.388	2.804	-0.182	0.87	0.879	ENSG00000149925	ALDOA	376	494	0.4	0.2	370	426	355	354	422	425	474	429	454	372	558	469	577	586	734	422	532	533
15	ENSG00000105220	glucose phosphate isomerase	GPI	63	89	0.5	ENSG00000105220	-0.955	-0.019	-0.912	-1.202	-0.506	-0.402	0.201	-0.209	-0.363	-0.843	1.303	0.108	0.912	1.001	1.268	1.09	0.019	0.201	ENSG00000105220	GPI	63	89	0.5	0.2	59	83	60	52	70	73	89	78	74	62	117	86	107	109	116	112	84	89
15	ENSG00000067057	phosphofructokinase, platelet	PFKP	24	36	0.6	ENSG00000067057	-1.385	-0.525	-1.671	-0.609	-1.146	0	-0.585	0	1.385	1.349	-0.394	0.824	1.456	1.194	0.167	0.74	0.549	-0.215	ENSG00000067057	PFKP	24	36	0.6	0.2	22	29	19	28	24	33	28	33	45	44	30	40	45	43	35	39	38	31
15	ENSG00000142657	phosphogluconate dehydrogenase	PGD	23	33	0.5	ENSG00000142657	-1.234	-0.144	-0.703	-0.861	-0.431	-0.918	-0.617	0.072	-0.072	-1.033	0.23	0.646	1.435	0.861	2.841	4.808	0.359	0.445	ENSG00000142657	PGD	23	33	0.5	0.3	19	27	23	22	25	21	24	28	27	21	29	32	38	34	48	61	30	31
15	ENSG00000101911	phosphoribosyl pyrophosphate synthetase 2	PRPS2	10	17	0.8	ENSG00000101911	-1.551	-0.185	-1.231	-1.012	-0.776	-0.944	-0.573	0.084	0.202	-0.084	0.185	-0.169	1.13	1.804	0.169	0.27	1.298	1.787	ENSG00000101911	PRPS2	10	17	0.8	0.4	6	14	8	9	11	10	12	16	17	15	17	14	22	26	16	17	23	26
15	ENSG00000177156	transaldolase 1	TALDO1	38	69	0.9	ENSG00000177156	-1.162	0.099	-1.18	-1.224	-0.768	-0.581	-0.279	-0.243	-0.074	-0.698	0.283	0.074	1.456	0.651	1.724	1.117	0.746	0.316	ENSG00000177156	TALDO1	38	69	0.9	0.4	30	64	29	28	40	45	54	55	59	42	69	63	101	79	108	92	81	70
16	Mismatch Repair	GENE NAME	Symbol	avgCON	avgAFF	log(a/c)	ENSG	N048	N068	N090	N098	L005	L137	L101	L062	L149	L140	L031	L072	L133	L074	L078	L102	L115	L027	pureENSG	gene	avgCON	avgAFF	log(a/c)	CV	N048	N068	N090	N098	L005	L137	L101	L062	L149	L140	L031	L072	L133	L074	L078	L102	L115	L027
16	ENSG00000106628	polymerase (DNA directed), delta 2, regulatory subunit 50kDa	POLD2	27	36	0.4	ENSG00000106628	-1.391	1.114	-1.223	-1.849	-1.704	-0.283	-0.861	0.175	0.078	1.174	-0.078	-0.199	1.439	0.283	-0.295	0.114	1.512	0.488	ENSG00000106628	POLD2	27	36	0.4	0.2	23	44	24	19	20	32	27	36	35	44	34	33	46	37	32	35	47	38
16	ENSG00000175482	polymerase (DNA-directed), delta 4	POLD4	53	68	0.4	ENSG00000175482	-0.679	0.67	-0.759	-1.417	-0.63	-0.847	-0.614	-0.028	-0.044	0.63	-0.124	0.028	2.276	1.634	2.517	0.478	3.248	0.687	ENSG00000175482	POLD4	53	68	0.4	0.2	51	68	50	42	52	49	52	59	59	67	58	60	88	80	91	65	100	68
16	ENSG00000132646	proliferating cell nuclear antigen	PCNA	32	47	0.6	ENSG00000132646	-0.315	-0.704	-0.894	0.081	0.286	-0.499	-0.081	-0.227	1.129	-1.518	0.733	0.543	5.968	1.026	1.811	0.77	-0.645	-0.403	ENSG00000132646	PCNA	32	47	0.6	0.5	34	28	26	39	42	31	37	35	53	17	48	45	119	52	63	48	29	32
16	ENSG00000163918	replication factor C (activator 1) 4, 37kDa	RFC4	7	12	0.7	ENSG00000163918	-1.294	0.018	-1.586	-1.841	-1.768	-0.638	-0.93	0.565	0.966	-0.419	0.091	0.711	4.867	0.893	0.31	0.419	-0.237	-0.018	ENSG00000163918	RFC4	7	12	0.7	0.4	7	11	6	6	6	9	8	12	13	9	11	13	24	13	11	12	10	11
16	ENSG00000132383	replication protein A1, 70kDa	RPA1	38	56	0.6	ENSG00000132383	-1.422	0.213	-0.765	-1.231	-0.514	-1.141	-0.138	-0.043	0.048	-0.835	0.584	-0.323	0.043	1.081	1.081	0.93	0.113	1.196	ENSG00000132383	RPA1	38	56	0.6	0.3	26	58	39	30	44	31	51	53	55	38	66	48	55	76	76	73	56	78
16	ENSG00000117748	replication protein A2, 32kDa	RPA2	35	49	0.5	ENSG00000117748	-1.093	0.471	-0.642	-0.707	-0.78	-0.849	-0.313	0.114	-0.179	-0.918	-0.114	0.142	0.52	0.841	0.809	0.333	0.951	0.833	ENSG00000117748	RPA2	35	49	0.5	0.4	21	59	32	30	28	27	40	50	43	25	45	51	60	68	67	56	71	68
16	ENSG00000106399	replication protein A3, 14kDa	RPA3	20	26	0.3	ENSG00000106399	-0.769	-0.638	-0.783	0.116	-0.319	-0.522	-0.914	-0.711	-0.116	-1.117	0.435	0.45	2.321	1.349	0.798	0.276	1.218	0.58	ENSG00000106399	RPA3	20	26	0.3	0.3	18	19	18	25	22	20	17	19	23	16	27	27	40	33	29	26	32	28
16	ENSG00000106028	single-stranded DNA binding protein 1	SSBP1	66	94	0.5	ENSG00000106028	-1.553	0.012	-1.468	-1.74	-1.426	0.185	-0.471	-0.208	-0.227	-0.878	0.391	0.124	1.108	0.967	0.358	-0.012	1.567	0.93	ENSG00000106028	SSBP1	66	94	0.5	0.2	58	91	60	54	61	95	81	87	86	72	99	94	115	112	99	91	124	111
17	Fatty Acid Elongation	GENE NAME	Symbol	avgCON	avgAFF	log(a/c)	ENSG	N048	N068	N090	N098	L005	L137	L101	L062	L149	L140	L031	L072	L133	L074	L078	L102	L115	L027	pureENSG	gene	avgCON	avgAFF	log(a/c)	CV	N048	N068	N090	N098	L005	L137	L101	L062	L149	L140	L031	L072	L133	L074	L078	L102	L115	L027
17	ENSG00000127884	enoyl Coenzyme A hydratase, short chain, 1, mitochondrial	ECHS1	16	25	0.6	ENSG00000127884	-1.219	0.13	-1.195	-1.254	-0.603	-0.722	-0.106	-0.071	-0.438	-0.757	0.958	0.26	0.627	0.994	0.615	0.071	0.757	0.97	ENSG00000127884	ECHS1	16	25	0.6	0.3	13	25	14	13	19	18	23	23	20	17	32	26	29	32	29	24	30	32
17	ENSG00000138796	hydroxyacyl-Coenzyme A dehydrogenase	HADH	8	13	0.6	ENSG00000138796	-1.741	0.662	-1.447	-1.3	-1.3	-1.275	-0.981	0.294	0.417	0.049	-0.441	-0.049	1.496	0.54	0.687	0.957	-0.098	0.491	ENSG00000138796	HADH	8	13	0.6	0.3	5	15	6	7	7	7	8	13	14	12	10	12	18	14	15	16	12	14
17	ENSG00000138029	hydroxyacyl-Coenzyme A dehydrogenase/3-ketoacyl-Coenzyme A thiolase/enoyl-Coenzyme A hydratase (trifunctional protein), beta subunit	HADHB	22	31	0.5	ENSG00000138029	-1.366	0.084	-0.916	-1.321	-0.781	-1.04	-0.736	-0.242	0.399	-0.467	0.118	-0.084	0.534	1.49	1.276	0.511	0.68	0.669	ENSG00000138029	HADHB	22	31	0.5	0.2	18	31	22	19	23	21	24	28	34	26	31	30	35	44	42	35	36	36
17	ENSG00000167315	hypothetical LOC648603; acetyl-Coenzyme A acyltransferase 2	ACAA2	15	27	0.9	ENSG00000167315	-0.719	-0.18	-0.801	-0.769	0.008	-0.008	-0.253	0.204	-0.123	-0.94	1.046	0.213	1.21	1.316	1.782	0.63	0.883	-0.311	ENSG00000167315	ACAA2	15	27	0.9	0.4	14	20	13	13	23	22	19	25	21	11	35	25	37	39	44	30	33	19
17	ENSG00000131238	palmitoyl-protein thioesterase 1	PPT1	53	73	0.5	ENSG00000131238	-0.818	0.504	-0.867	-1.128	0.168	-0.221	0.756	-0.168	-0.597	-0.765	0.916	-0.287	-0.195	0.708	2.11	0.641	0.5	1.455	ENSG00000131238	PPT1	53	73	0.5	0.3	48	78	47	41	70	61	83	62	53	49	87	60	62	82	114	81	78	99
	Category	Term	Genes	Count	%	P-Value	Benjamini
18	INTERPRO	Immunoglobulin V-set		33	2.8	8.6e-05	0.019
19	INTERPRO	NAD(P)-binding domain		27	2.3	2e-06	0.00063
20	INTERPRO	EF-Hand type		23	2	0.04	0.84
21	INTERPRO	Thioredoxin fold		22	1.9	9.3e-07	0.00049
22	INTERPRO	Small GTP-binding protein		20	1.7	0.0085	0.57
23	INTERPRO	Thioredoxin-like		15	1.3	1.3e-08	2.1e-05
24	INTERPRO	Nucleic acid-binding, OB-fold		12	1	0.00037	0.062
25	INTERPRO	Short-chain dehydrogenase/reductase SDR		9	0.8	0.03	0.81
26	INTERPRO	Proteasome, subunit alpha/beta		8	0.7	9.6e-05	0.019
18	Ig V-set	GENE NAME	Symbol	avgCON	avgAFF	log(a/c)	ENSG	N048	N068	N090	N098	L005	L137	L101	L062	L149	L140	L031	L072	L133	L074	L078	L102	L115	L027	pureENSG	gene	avgCON	avgAFF	log(a/c)	CV	N048	N068	N090	N098	L005	L137	L101	L062	L149	L140	L031	L072	L133	L074	L078	L102	L115	L027
18	ENSG00000007312	CD79b molecule, immunoglobulin-associated beta	CD79B	24	55	1.2	ENSG00000007312	-0.286	-0.176	0.138	-1.029	-0.248	-0.706	-0.532	1.563	-0.176	-0.918	-0.138	0.435	2.098	1.364	1.665	0.643	5.699	1.657	ENSG00000007312	CD79B	24	55	1.2	0.8	25	28	35	8	26	15	19	69	28	10	29	42	81	64	71	47	166	71
18	ENSG00000153563	CD8a molecule	CD8A	178	257	0.5	ENSG00000153563	-0.36	-0.702	-0.647	0.197	-0.594	-0.489	1.353	-0.018	-0.722	1.392	3.777	1.271	0.856	0.018	-1.21	0.239	3.177	-0.557	ENSG00000153563	CD8A	178	257	0.5	0.4	180	152	156	225	161	169	319	207	150	322	515	312	278	210	111	228	467	164
18	ENSG00000172116	CD8b molecule	CD8B	112	202	0.9	ENSG00000172116	-0.582	-0.202	-0.971	-0.884	-0.113	-0.024	1.676	-0.08	-1.03	1.093	2.217	0.378	0.16	0.379	-1.118	0.767	3.215	0.024	ENSG00000172116	CD8B	112	202	0.9	0.5	118	149	87	94	156	163	301	159	82	253	344	196	178	196	75	227	425	167
18	ENSG00000160856	Fc receptor-like 3	FCRL3	8	16	1.1	ENSG00000160856	-0.651	-1.074	-0.463	-0.996	-1.231	-0.949	-0.62	0.918	1.984	-0.118	2.769	2.612	-0.463	0.698	0.259	0.196	0.4	0.118	ENSG00000160856	FCRL3	8	16	1.1	0.5	9	6	10	6	5	7	9	19	25	12	30	29	10	17	14	14	15	14
18	ENSG00000162739	SLAM family member 6	SLAMF6	19	43	1.2	ENSG00000162739	-1.936	-0.358	-1.4	-1.828	-1.894	-1.28	-0.834	0.407	0.485	0.25	0.684	-0.021	0.665	1.641	-0.136	1.177	0.021	0.443	ENSG00000162739	SLAMF6	19	43	1.2	0.5	10	36	19	12	11	21	28	49	50	46	54	42	53	70	40	62	43	50
18	ENSG00000026751	SLAM family member 7	SLAMF7	9	29	1.8	ENSG00000026751	-0.453	-0.713	-0.464	-0.697	-0.652	-0.337	0.205	0.763	0.874	-0.437	2.449	1.128	2.239	1.421	0.885	-0.205	0.492	-0.498	ENSG00000026751	SLAMF7	9	29	1.8	0.7	11	6	11	7	7	13	23	33	35	11	63	40	60	45	35	15	28	10
18	ENSG00000181847	T cell immunoreceptor with Ig and ITIM domains	TIGIT	19	35	0.9	ENSG00000181847	-0.976	-0.761	0.144	-0.696	-0.359	-0.653	-0.258	0.466	1.808	-0.144	1.564	0.732	1.119	1.945	0.538	-0.237	1.787	-0.144	ENSG00000181847	TIGIT	19	35	0.9	0.4	14	17	29	18	22	18	24	34	53	25	49	38	43	54	35	24	52	25
18	ENSG00000211800, ENSG00000211829	T cell receptor alpha constant; T cell receptor alpha locus; T cell receptor alpha variable 20; T cell receptor delta locus; T cell receptor delta variable 2	%%%
18	ENSG00000211746	T cell receptor beta variable 19; T cell receptor beta constant 1	TRBV19	26	40	0.6	ENSG00000211746	-0.713	-0.01	-1.415	-0.302	0.379	0.546	0.81	-1.325	0.01	-0.344	5.399	1.512	-1.443	2.201	0.254	-0.789	0.455	-0.636	ENSG00000211746	TRBV19	26	40	0.6	0.6	25	35	15	31	40	43	47	16	35	30	113	57	14	67	39	24	41	26
18	ENSG00000139192	TAP binding protein-like	TAPBPL	21	34	0.7	ENSG00000139192	-0.717	0.096	-1.071	-1.37	-0.632	0.096	-0.353	-0.236	0.021	0.375	1.659	-0.021	1.927	-0.632	2.933	-0.867	1.338	0.878	ENSG00000139192	TAPBPL	21	34	0.7	0.4	21	29	18	15	22	29	25	26	28	32	44	28	46	22	55	20	41	36
18	ENSG00000186470	butyrophilin, subfamily 3, member A2	BTN3A2	67	99	0.6	ENSG00000186470	-2.728	0.799	-2.825	-2.912	-2.202	-2.56	-1.52	0.187	0.507	0.046	-0.479	-0.414	0.485	0.815	0.55	-0.019	0.019	1.276	ENSG00000186470	BTN3A2	67	99	0.6	0.3	52	117	51	49	62	55	75	106	112	104	94	95	112	118	113	102	103	126
18	ENSG00000107738	chromosome 10 open reading frame 54	C10orf54	96	137	0.5	ENSG00000107738	-0.711	-0.355	-0.803	-0.664	-0.371	-0.685	1.246	-0.551	-0.124	1.776	0.154	0.124	4.557	0.376	7.77	3.578	-0.463	1.771	ENSG00000107738	C10orf54	96	137	0.5	0.3	94	101	93	95	101	95	132	97	106	143	111	111	197	115	259	178	99	143
18	ENSG00000182578	colony stimulating factor 1 receptor	CSF1R	2	16	3.2	ENSG00000182578	-0.365	0.729	-0.547	-0.656	3.828	-0.438	-0.036	2.224	3.281	-0.693	-0.438	3.135	8.531	1.932	40.469	-0.292	-0.656	0.036	ENSG00000182578	CSF1R	2	16	3.2	2.2	1	4	1	1	13	1	2	8	11	0	1	11	26	8	113	2	1	2
18	ENSG00000211974	immunoglobulin heavy variable 2-70; similar to hCG1742309	IGHV2-70	6	18	1.7	ENSG00000211974	3.78	-0.831	0.204	-0.58	-0.267	4.439	-0.298	-0.424	0.612	-0.392	4.157	1.898	44.595	5.317	2.4	-0.518	-0.204	-0.737	ENSG00000211974	IGHV2-70	6	18	1.7	2.2	16	1	4	2	3	18	3	2	6	2	17	10	146	21	11	2	3	1
18	ENSG00000211949	immunoglobulin heavy variable 3-23; immunoglobulin heavy variable group	IGHV3-23	84	172	1	ENSG00000211949	3.417	-0.043	-0.218	-0.77	0.014	1.349	-0.472	-0.014	0.019	-0.972	1.87	1.283	26.02	4.035	-0.906	-0.229	0.579	-0.295	ENSG00000211949	IGHV3-23	84	172	1	2	221	53	45	18	56	121	32	55	56	8	146	118	1319	251	11	44	83	41
18	ENSG00000211964	immunoglobulin heavy variable 3-48	IGHV3-48	15	34	1.2	ENSG00000211964	1.441	-0.419	-0.06	-0.714	-0.251	0.85	-0.643	0.068	0.06	-0.938	0.674	1.824	17.964	3.628	-0.882	-0.667	0.674	-0.499	ENSG00000211964	IGHV3-48	15	34	1.2	1.8	33	9	14	6	11	25	6	15	15	3	23	37	240	60	3	6	23	8
18	ENSG00000211598	immunoglobulin kappa variable 4-1	IGKV4-1	89	159	0.8	ENSG00000211598	2.843	-0.141	0.141	-0.877	0.434	2.013	-0.072	0.072	-0.49	-0.711	1.872	4.031	15.806	3.396	-0.671	-0.362	-0.192	-0.678	ENSG00000211598	IGKV4-1	89	159	0.8	1.5	219	54	70	13	86	173	58	66	35	23	165	285	936	250	25	42	51	24
18	ENSG00000211655	immunoglobulin lambda variable 1-36	IGLV1-36	7	27	2	ENSG00000211655	1.14	-0.794	-0.448	-0.949	-0.46	0.209	0.006	0.281	1.343	-0.436	1.976	2.298	21.876	6.417	-0.006	-0.555	-0.34	-0.83	ENSG00000211655	IGLV1-36	7	27	2	1.9	18	2	5	1	5	11	9	11	20	5	25	28	192	63	9	4	6	2
18	ENSG00000211642	immunoglobulin lambda variable 10-54	IGLV10-54	10	10	-0.1	ENSG00000211642	3.559	-0.732	0.23	-0.832	-0.215	-0.703	-0.646	0.962	-0.158	-0.918	0.545	-0.531	5.525	3.746	1.076	0.086	0.215	-0.086	ENSG00000211642	IGLV10-54	10	10	-0.1	1.1	31	1	8	1	5	2	2	13	5	0	10	3	45	33	14	7	8	6
18	ENSG00000211668, ENSG00000211679, ENSG00000211669, ENSG00000211651, ENSG00000211671, ENSG00000211662, ENSG00000211653, ENSG00000211677	immunoglobulin lambda variable 2-11; immunoglobulin lambda constant 2 (Kern-Oz- marker); immunoglobulin lambda variable 1-44; immunoglobulin lambda constant 1 (Mcg marker); immunoglobulin lambda variable 1-40; immunoglobulin lambda variable 3-21; immunoglobulin lambda locus; immunoglobulin lambda constant 3 (Kern-Oz+ marker)	%%%
18	ENSG00000211664	immunoglobulin lambda variable 2-18	IGLV2-18	11	14	0.4	ENSG00000211664	0.997	3.969	0	-0.547	-0.43	0.997	-0.313	-0.156	-0.293	-0.626	3.421	4.946	11.32	4.673	-0.723	0	2.502	-0.274	ENSG00000211664	IGLV2-18	11	14	0.4	1.1	11	26	6	3	3	11	4	5	4	2	23	31	63	29	2	6	18	4
18	ENSG00000211660	immunoglobulin lambda variable 2-23	IGLV2-23	39	98	1.3	ENSG00000211660	1.149	-0.837	-0.006	-0.866	0.151	1.977	0.006	0.265	-0.285	-0.728	2.399	2.542	10.34	5.421	-0.11	-0.377	-0.018	-0.621	ENSG00000211660	IGLV2-23	39	98	1.3	1.2	92	10	45	9	51	127	45	56	33	15	144	150	472	269	40	29	44	19
18	ENSG00000211663	immunoglobulin lambda variable 3-19	IGLV3-19	27	115	2.1	ENSG00000211663	0.217	-1.049	-0.459	-1.182	0.025	6.448	-0.814	0.509	0.187	-0.535	-0.505	1.516	21.98	9.836	-0.92	-0.025	0.157	-0.907	ENSG00000211663	IGLV3-19	27	115	2.1	1.6	52	14	31	10	46	240	21	61	51	29	30	91	708	342	17	44	50	18
18	ENSG00000211659	immunoglobulin lambda variable 3-25	IGLV3-25	30	141	2.2	ENSG00000211659	1.288	-0.866	-0.143	-0.786	-0.725	1.001	-0.088	0.311	-0.181	0.088	1.766	1.083	31.77	3.059	0.143	-0.3	-0.624	-0.592	ENSG00000211659	IGLV3-25	30	141	2.2	2.5	84	2	30	5	8	73	32	47	28	38	102	76	1231	150	40	24	12	13
18	ENSG00000211658	immunoglobulin lambda variable 3-27	IGLV3-27	2	20	3.1	ENSG00000211658	0.073	-0.726	-0.706	-0.737	-0.446	1.899	0.54	-0.363	0.031	0.073	1.442	0.841	13.978	3.3	-0.747	-0.591	-0.031	-0.643	ENSG00000211658	IGLV3-27	2	20	3.1	1.9	8	0	1	0	3	26	13	4	8	8	21	15	142	39	0	2	7	1
18	ENSG00000211639	immunoglobulin lambda variable 4-60	IGLV4-60	5	16	1.8	ENSG00000211639	2.919	-0.907	-0.858	-0.662	-0.098	0.613	-0.147	0.098	7.162	-0.172	2.894	3.017	20.995	9.124	-0.221	-0.196	0.687	-0.54	ENSG00000211639	IGLV4-60	5	16	1.8	1.5	16	0	1	1	4	7	4	5	33	3	16	16	90	41	3	3	7	2
18	ENSG00000211637	immunoglobulin lambda variable 4-69	IGLV4-69	15	37	1.4	ENSG00000211637	0.697	-0.645	0.062	-0.874	-0.763	0.815	-0.357	-0.501	0.232	-0.789	4.384	1.103	12.432	4.548	-0.652	0.036	-0.036	-0.599	ENSG00000211637	IGLV4-69	15	37	1.4	1.4	28	8	18	4	6	30	12	10	21	5	84	34	207	87	8	18	17	8
18	ENSG00000211640	immunoglobulin lambda variable 6-57	IGLV6-57	15	65	2.2	ENSG00000211640	1.937	-0.513	-0.499	-0.788	0.093	0.705	-0.086	-0.203	0.086	-0.54	3.913	2.302	36.371	7.01	0.939	-0.644	-0.416	-0.767	ENSG00000211640	IGLV6-57	15	65	2.2	2.3	42	7	7	3	15	24	13	11	15	6	71	47	542	116	28	5	8	3
18	ENSG00000211652	immunoglobulin lambda variable 7-43	IGLV7-43	10	27	1.4	ENSG00000211652	2.029	-0.397	-0.408	-1.066	-0.408	2.177	0.079	-0.533	0.011	-0.68	2.177	0.907	20.405	5.815	-0.669	0.68	-0.011	-0.578	ENSG00000211652	IGLV7-43	10	27	1.4	1.8	28	6	6	0	6	29	10	5	10	4	29	18	190	61	4	16	10	5
18	ENSG00000211649	immunoglobulin lambda variable 7-46 (gene/pseudogene)	IGLV7-46	13	40	1.6	ENSG00000211649	2.725	-0.621	-0.342	-0.827	-0.728	0.216	-0.072	-0.432	0.45	-0.854	8.786	2.32	21.988	5.756	-0.396	0.072	0.8	-0.513	ENSG00000211649	IGLV7-46	13	40	1.6	1.8	41	4	7	1	2	13	10	6	16	1	108	36	255	75	6	11	19	5
18	ENSG00000089692	lymphocyte-activation gene 3	LAG3	4	15	1.9	ENSG00000089692	-0.621	-0.755	-0.701	-0.755	-0.648	0.04	0.432	0.728	2.428	-0.229	4.236	0.85	1.659	1.012	-0.189	-0.04	0.432	-0.472	ENSG00000089692	LAG3	4	15	1.9	0.8	5	4	4	4	4	9	12	15	27	7	41	15	21	17	8	9	12	6
18	ENSG00000089012	signal-regulatory protein gamma	SIRPG	37	51	0.5	ENSG00000089012	-0.968	1.433	-1.177	-1.27	-0.577	-0.423	0.847	-0.447	-0.126	-0.26	0.912	-0.386	0.381	0.772	0.126	0.321	0.954	1.568	ENSG00000089012	SIRPG	37	51	0.5	0.4	27	78	22	20	35	38	66	38	45	42	67	39	56	64	50	54	68	81
18	ENSG00000211650	similar to immunoglobulin iota chain preproprotein; immunoglobulin lambda variable 5-45	IGLV5-45	4	14	1.9	ENSG00000211650	0.492	-1.258	-0.31	-0.784	0.237	2.534	-0.346	-0.638	-0.237	-0.638	13.253	5.852	19.269	10.336	-0.602	0.419	0.711	-0.82	ENSG00000211650	IGLV5-45	4	14	1.9	1.3	6	1	4	3	6	12	4	3	4	3	41	21	58	33	3	6	7	3
19	NADP Binding	GENE NAME	Symbol	avgCON	avgAFF	log(a/c)	ENSG	N048	N068	N090	N098	L005	L137	L101	L062	L149	L140	L031	L072	L133	L074	L078	L102	L115	L027	pureENSG	gene	avgCON	avgAFF	log(a/c)	CV	N048	N068	N090	N098	L005	L137	L101	L062	L149	L140	L031	L072	L133	L074	L078	L102	L115	L027
19	ENSG00000104325	2,4-dienoyl CoA reductase 1, mitochondrial	DECR1	31	45	0.5	ENSG00000104325	-1.107	-0.078	-1.141	-1.34	-0.709	-0.398	-0.121	0.078	0.527	-0.951	0.994	0.112	2.24	1.349	1.314	0.64	-0.294	0.268	ENSG00000104325	DECR1	31	45	0.5	0.3	29	41	28	26	33	37	40	42	48	31	53	43	67	57	57	49	38	45
19	ENSG00000004468	CD38 molecule	CD38	5	20	2	ENSG00000004468	-0.416	-0.359	-0.804	-1.048	-0.603	-0.33	-0.144	1.148	1.622	-0.402	5.554	0.746	8.725	4.248	1.234	0.258	-0.56	0.144	ENSG00000004468	CD38	5	20	2	1	7	7	4	2	6	7	9	18	21	7	48	15	71	39	18	12	6	11
19	ENSG00000109854	HIV-1 Tat interactive protein 2, 30kDa	HTATIP2	18	28	0.6	ENSG00000109854	-1.33	-0.629	-1.602	-1.784	-1.33	-0.824	0.175	0.097	0.201	-0.979	0.681	-0.097	0.149	0.668	0.318	-0.512	1.031	0.707	ENSG00000109854	HTATIP2	18	28	0.6	0.3	18	23	16	14	18	22	29	29	30	20	33	27	29	33	30	24	36	33
19	ENSG00000153406	NmrA-like family domain containing 1	NMRAL1	19	27	0.5	ENSG00000153406	-0.778	-0.013	-0.921	-0.934	-1.09	-0.272	-0.285	0.674	0.454	0.804	0.272	1.051	0.96	0.674	-0.13	0.013	1.621	-0.078	ENSG00000153406	NMRAL1	19	27	0.5	0.2	18	24	17	17	16	22	22	30	28	31	27	33	32	30	23	25	37	24
19	ENSG00000142230	SUMO1 activating enzyme subunit 1	SAE1	40	56	0.5	ENSG00000142230	-1.148	0.86	-1.774	-1.627	-1.128	-0.521	0.508	-0.304	-0.713	-0.54	0.425	0.131	1.448	0.636	0.732	1.288	-0.131	0.515	ENSG00000142230	SAE1	40	56	0.5	0.3	36	68	27	29	37	46	62	50	43	46	61	56	77	64	66	74	52	62
19	ENSG00000101444	adenosylhomocysteinase	AHCY	19	29	0.6	ENSG00000101444	-1.145	-0.245	-1.322	-1.731	0.313	-0.531	0.504	-0.695	-0.913	-0.845	0.654	-0.341	1.717	0.45	0.327	2.058	0.913	0.245	ENSG00000101444	AHCY	19	29	0.6	0.3	18	25	17	14	29	23	30	22	20	21	32	24	39	30	29	42	33	29
19	ENSG00000168710	adenosylhomocysteinase-like 1	AHCYL1	8	13	0.7	ENSG00000168710	-0.951	0.723	-0.626	-0.886	-0.561	-0.723	-0.479	0.544	0.577	-0.138	-0.008	-0.024	1.097	1.13	1.796	0.805	0.008	0.951	ENSG00000168710	AHCYL1	8	13	0.7	0.4	5	15	7	6	8	7	8	14	15	10	11	11	18	18	22	16	11	17
19	ENSG00000106605	biliverdin reductase A	BLVRA	16	25	0.6	ENSG00000106605	-0.732	-0.951	-0.912	-0.835	0.398	0.167	0.077	-0.578	1.079	-1.49	0.013	0.154	0.758	0.617	3.918	-0.758	-0.013	-0.218	ENSG00000106605	BLVRA	16	25	0.6	0.4	17	15	16	16	26	24	23	18	31	11	23	24	29	27	53	17	23	21
19	ENSG00000159228	carbonyl reductase 1	CBR1	8	14	0.8	ENSG00000159228	-0.909	0.381	-0.909	-1.32	-0.674	-0.342	0.127	-0.42	-0.029	-0.674	-0.108	0.029	1.769	1.652	3.196	0.401	1.085	0.948	ENSG00000159228	CBR1	8	14	0.8	0.4	7	14	7	5	9	10	13	10	12	9	11	12	21	20	28	14	18	17
19	ENSG00000140632	cytokine-like nuclear factor n-pac	GLYR1	20	27	0.4	ENSG00000140632	-2.048	0.476	-0.934	-1.281	-1.665	-1.479	-1.145	0.439	0.798	0.415	-0.798	-0.464	0.204	0.538	0.575	0.068	-0.068	0.773	ENSG00000140632	GLYR1	20	27	0.4	0.3	11	31	20	17	14	16	18	31	34	31	21	24	29	32	32	28	27	34
19	ENSG00000157326	dehydrogenase/reductase (SDR family) member 4	DHRS4	15	21	0.5	ENSG00000157326	-0.808	-0.577	-1.535	-1.145	-0.524	0.275	0.399	-0.737	-0.79	-0.151	0.328	-0.737	0.861	0.577	0.151	0.612	1.784	0.95	ENSG00000157326	DHRS4	15	21	0.5	0.2	16	17	12	14	17	22	23	16	16	19	22	16	25	24	21	24	30	26
19	ENSG00000100612	dehydrogenase/reductase (SDR family) member 7	DHRS7	36	52	0.5	ENSG00000100612	-0.684	-0.665	-0.352	-1.088	0.033	-0.274	0.28	-0.033	-0.235	-1.408	1.962	0.86	-1.193	1.219	2.19	0.534	0.567	1.147	ENSG00000100612	DHRS7	36	52	0.5	0.3	37	37	42	30	48	43	51	47	43	25	77	60	29	66	81	55	56	65
19	ENSG00000111640	glyceraldehyde-3-phosphate dehydrogenase-like 6; hypothetical protein LOC100133042; glyceraldehyde-3-phosphate dehydrogenase	GAPDH	461	737	0.7	ENSG00000111640	-0.495	-0.805	-1.037	-0.896	0.007	-0.007	0.737	-0.764	-0.296	-1.141	1.935	0.158	2.895	0.612	1.716	0.453	0.202	-0.489	ENSG00000111640	GAPDH	461	737	0.7	0.4	533	462	408	441	649	645	817	471	579	384	1092	683	1313	788	1042	751	694	535
19	ENSG00000137106	glyoxylate reductase/hydroxypyruvate reductase	GRHPR	22	33	0.6	ENSG00000137106	-1.323	-0.088	-0.41	-1.313	-0.866	-0.524	0.254	-0.617	0.856	-0.732	0.96	-0.14	0.97	0.285	0.088	1.126	0.192	2.392	ENSG00000137106	GRHPR	22	33	0.6	0.3	17	29	26	17	22	25	32	24	38	23	39	29	39	33	31	41	32	53
19	ENSG00000138796	hydroxyacyl-Coenzyme A dehydrogenase	HADH	8	13	0.6	ENSG00000138796	-1.741	0.662	-1.447	-1.3	-1.3	-1.275	-0.981	0.294	0.417	0.049	-0.441	-0.049	1.496	0.54	0.687	0.957	-0.098	0.491	ENSG00000138796	HADH	8	13	0.6	0.3	5	15	6	7	7	7	8	13	14	12	10	12	18	14	15	16	12	14
19	ENSG00000149084	hydroxysteroid (17-beta) dehydrogenase 12	HSD17B12	11	13	0.3	ENSG00000149084	-1.067	-0.659	-0.125	0.125	0.69	-0.722	-0.251	0.282	-0.376	-0.659	1.725	0.157	-1.161	4.329	-0.659	1.067	3.137	1.474	ENSG00000149084	HSD17B12	11	13	0.3	0.3	9	10	12	12	14	10	11	13	11	10	18	13	8	26	10	15	22	17
19	ENSG00000133835	hydroxysteroid (17-beta) dehydrogenase 4	HSD17B4	14	23	0.7	ENSG00000133835	-0.844	0.971	-0.717	-0.703	-0.745	-0.533	-0.109	0.752	0.046	-0.074	-0.046	-0.06	0.674	0.639	0.632	1.197	0.674	0.999	ENSG00000133835	HSD17B4	14	23	0.7	0.4	7	33	9	9	8	11	17	30	20	18	18	18	28	28	28	36	28	33
19	ENSG00000014641	malate dehydrogenase 1, NAD (soluble)	MDH1	53	70	0.4	ENSG00000014641	-1.135	-0.175	-0.718	-0.684	-0.703	-0.665	0.026	-0.122	0.449	-1.006	0.295	0.223	0.881	1.126	0.742	-0.026	0.943	0.641	ENSG00000014641	MDH1	53	70	0.4	0.2	43	63	52	53	52	53	67	64	76	46	73	71	85	90	82	66	86	80
19	ENSG00000082212	malic enzyme 2, NAD(+)-dependent, mitochondrial	ME2	15	26	0.8	ENSG00000082212	-1.82	-0.283	-1.835	-1.951	-1.226	-0.834	-0.007	0.587	0.471	-0.616	0.384	0.007	0.733	1.066	1.501	-0.196	0.834	0.515	ENSG00000082212	ME2	15	26	0.8	0.3	12	23	12	11	16	19	25	29	28	20	27	25	30	32	35	23	30	28
19	ENSG00000100714	methylenetetrahydrofolate dehydrogenase (NADP+ dependent) 1, methenyltetrahydrofolate cyclohydrolase, formyltetrahydrofolate synthetase	MTHFD1	7	12	0.7	ENSG00000100714	-0.949	0.075	-0.949	-0.974	-0.774	-0.575	-0.25	0.475	1.074	-0.075	0.899	-0.3	3.672	1.599	1.224	0.25	-0.2	0.35	ENSG00000100714	MTHFD1	7	12	0.7	0.4	6	10	6	6	7	8	9	12	14	10	14	9	25	16	15	11	9	11
19	ENSG00000112992	nicotinamide nucleotide transhydrogenase	NNT	14	21	0.6	ENSG00000112992	-2.341	0.337	-1.378	-1.821	-1.783	-1.147	-0.414	0.164	0.646	-0.472	-0.164	0.453	0.665	1.07	0.684	1.108	-0.838	0.472	ENSG00000112992	NNT	14	21	0.6	0.3	9	23	14	12	12	15	19	22	25	19	20	24	25	27	25	27	17	24
19	ENSG00000142657	phosphogluconate dehydrogenase	PGD	23	33	0.5	ENSG00000142657	-1.234	-0.144	-0.703	-0.861	-0.431	-0.918	-0.617	0.072	-0.072	-1.033	0.23	0.646	1.435	0.861	2.841	4.808	0.359	0.445	ENSG00000142657	PGD	23	33	0.5	0.3	19	27	23	22	25	21	24	28	27	21	29	32	38	34	48	61	30	31
19	ENSG00000143811	pyrroline-5-carboxylate reductase family, member 2	PYCR2	44	55	0.3	ENSG00000143811	-0.973	1.305	-0.792	-0.855	-0.899	-0.738	-0.327	0.186	-0.039	1.036	-0.611	0.039	0.122	0.386	-0.23	0.381	1.774	1.329	ENSG00000143811	PYCR2	44	55	0.3	0.3	31	77	34	33	32	35	44	54	50	72	38	51	53	58	46	58	87	78
19	ENSG00000072042	retinol dehydrogenase 11 (all-trans/9-cis/11-cis)	RDH11	14	21	0.6	ENSG00000072042	-1.763	0.236	-1.682	-1.812	-1.585	-1.406	-1.146	0.138	0.219	-1	-0.252	0.024	0.496	1.471	0.496	0.561	-0.024	0.788	ENSG00000072042	RDH11	14	21	0.6	0.3	11	23	12	11	12	13	15	23	23	16	20	22	25	31	25	25	22	27
19	ENSG00000163541	succinate-CoA ligase, alpha subunit	SUCLG1	20	32	0.7	ENSG00000163541	-1.503	0.26	-1.416	-1.301	-1.176	-0.78	-0.414	0.52	-0.029	-0.472	-0.183	0.029	1.696	1.156	0.424	0.578	0.829	0.771	ENSG00000163541	SUCLG1	20	32	0.7	0.3	15	33	16	17	18	22	26	36	30	25	28	31	48	42	35	36	39	38
19	ENSG00000144744	ubiquitin-like modifier activating enzyme 3	UBA3	17	27	0.7	ENSG00000144744	-1.301	-0.181	-0.939	-1.12	-0.939	-0.662	-0.385	0.747	1.216	1.349	-0.325	0.289	0.831	0.41	-0.012	0.687	0.012	0.518	ENSG00000144744	UBA3	17	27	0.7	0.3	13	23	16	15	16	19	21	30	34	35	21	27	31	28	24	30	24	28
19	ENSG00000108828	vesicle amine transport protein 1 homolog (T. californica)	VAT1	15	20	0.4	ENSG00000108828	-1.288	0.268	-0.649	-1.116	-0.527	-0.164	0.164	-0.389	-0.355	-1.323	0.873	0.164	-1.617	0.7	0.752	1.876	0.389	1.133	ENSG00000108828	VAT1	15	20	0.4	0.3	12	21	15	13	16	18	20	17	17	12	24	20	10	23	24	30	21	26
20	EF-Hand	GENE NAME	Symbol	avgCON	avgAFF	log(a/c)	ENSG	N048	N068	N090	N098	L005	L137	L101	L062	L149	L140	L031	L072	L133	L074	L078	L102	L115	L027	pureENSG	gene	avgCON	avgAFF	log(a/c)	CV	N048	N068	N090	N098	L005	L137	L101	L062	L149	L140	L031	L072	L133	L074	L078	L102	L115	L027
20	ENSG00000142634	EF-hand domain family, member D2	EFHD2	58	91	0.6	ENSG00000142634	0.819	-1.08	-0.755	-0.57	-0.594	-0.433	0.785	0.895	0.81	-0.138	2.666	1.922	0.548	0.138	2.408	-0.184	-0.406	-0.46	ENSG00000142634	EFHD2	58	91	0.6	0.4	98	36	46	53	52	57	97	101	98	67	159	135	89	76	151	65	58	56
20	ENSG00000163191	S100 calcium binding protein A11; S100 calcium binding protein A11 pseudogene	S100A11	74	165	1.2	ENSG00000163191	-0.671	-0.244	-1.023	-0.775	-0.534	-0.719	-0.111	-0.061	1.076	-0.678	0.061	0.179	1.191	1.291	5.794	0.256	0.94	0.362	ENSG00000163191	S100A11	74	165	1.2	0.7	75	104	51	68	84	71	113	116	193	74	124	132	201	208	514	138	184	145
20	ENSG00000196154	S100 calcium binding protein A4	S100A4	539	922	0.8	ENSG00000196154	0.046	-1.165	-1.235	-1.231	-0.318	0.01	1.118	-0.451	-0.01	-1.492	1.938	0.725	0.244	0.5	2.958	-0.624	1.348	-0.471	ENSG00000196154	S100A4	539	922	0.8	0.4	835	455	433	434	721	824	1172	679	818	352	1429	1048	898	978	1750	625	1244	673
20	ENSG00000197956	S100 calcium binding protein A6	S100A6	421	600	0.5	ENSG00000197956	-0.002	-0.555	-1.011	-0.782	-0.078	0.35	1.156	-0.042	-0.228	-1.236	1.782	1.243	0.002	1.268	2.292	-0.232	1.956	0.567	ENSG00000197956	S100A6	421	600	0.5	0.3	514	426	353	390	502	571	699	508	478	317	799	713	515	717	881	478	827	605
20	ENSG00000143546	S100 calcium binding protein A8	S100A8	9	57	2.7	ENSG00000143546	1.693	-0.899	-0.714	-0.935	3.253	-0.67	0.088	-0.679	-0.555	-0.088	-0.82	0.185	0.212	0.379	1.666	45.795	-0.282	0.203	ENSG00000143546	S100A8	9	57	2.7	2.9	30	1	3	0	48	3	12	3	5	10	2	13	13	15	30	530	8	13
20	ENSG00000163220	S100 calcium binding protein A9	S100A9	22	89	2.1	ENSG00000163220	2.083	-0.766	-0.619	-0.828	2.32	-0.611	0.288	-0.513	-0.456	-0.223	-0.738	0.591	1.073	0.73	2.921	28.453	-0.088	0.088	ENSG00000163220	S100A9	22	89	2.1	2.4	73	4	7	2	79	7	29	10	11	17	4	37	49	40	94	718	20	24
20	ENSG00000160307	S100 calcium binding protein B	S100B	22	19	-0.3	ENSG00000160307	-0.376	4.877	-0.052	1.829	-0.272	-0.441	1.985	-0.013	-0.882	0.026	-0.467	9.08	-1.09	1.699	-0.182	4.67	0.013	2.724	ENSG00000160307	S100B	22	19	-0.3	1	7	48	10	24	8	7	25	10	3	10	7	80	2	23	9	46	10	31
20	ENSG00000130402	actinin, alpha 4	ACTN4	74	102	0.5	ENSG00000130402	-0.254	-1.196	-0.746	-0.451	-1.365	-0.815	0.415	0.394	1.905	-0.829	1.167	0.603	1.171	0.574	2.193	0.21	-0.232	-0.21	ENSG00000130402	ACTN4	74	102	0.5	0.3	85	59	71	80	54	70	104	103	145	69	125	109	125	108	153	98	86	86
20	ENSG00000187446	calcium binding protein P22	CHP1	12	17	0.5	ENSG00000187446	-0.622	-0.79	-0.959	-0.811	0.221	-0.516	0.221	0.053	-0.011	-1.549	1.36	0.011	0.79	1.275	2.308	0.664	-0.685	-0.011	ENSG00000187446	CHP1	12	17	0.5	0.3	13	12	11	12	17	14	17	16	16	9	22	16	20	22	27	19	13	16
20	ENSG00000160014	calmodulin 3 (phosphorylase kinase, delta); calmodulin 2 (phosphorylase kinase, delta); calmodulin 1 (phosphorylase kinase, delta)	CALM3	259	350	0.4	ENSG00000160014	-0.911	0.413	-1.037	-0.896	-0.557	-0.036	0.598	-0.217	-0.481	-0.592	0.753	-0.172	1.095	1.04	0.751	0.036	0.779	0.765	ENSG00000160014	CALM3	259	350	0.4	0.2	224	377	210	226	265	325	398	304	274	261	416	310	456	449	416	334	419	418
20	ENSG00000014216	calpain 1, (mu/I) large subunit	CAPN1	42	59	0.5	ENSG00000014216	-1.726	0.056	-1.328	-1.657	-1.496	-1.615	-0.035	0.098	0.769	-0.049	0.965	0.035	-0.377	0.972	1.754	-0.049	0.58	0.168	ENSG00000014216	CAPN1	42	59	0.5	0.3	34	59	39	35	37	35	58	60	69	58	72	59	53	72	84	58	67	61
20	ENSG00000153395	lysophosphatidylcholine acyltransferase 1	LPCAT1	17	29	0.8	ENSG00000153395	-0.86	-0.732	-0.682	-0.782	-1.36	-1.196	-0.667	0.153	0.953	0.004	0.482	0.696	0.046	0.182	0.796	-0.004	0.346	-0.082	ENSG00000153395	LPCAT1	17	29	0.8	0.4	16	17	18	17	9	11	18	30	41	28	34	37	28	30	39	28	32	26
20	ENSG00000101608	myosin, light chain 12A, regulatory, non-sarcomeric	MYL12A	242	416	0.8	ENSG00000101608	-1.249	-0.592	-1.549	-1.516	-0.993	-0.278	0.479	-0.556	-0.738	-0.077	0.23	0.077	0.404	1.369	0.611	1.159	2.262	1.328	ENSG00000101608	MYL12A	242	416	0.8	0.3	239	315	204	208	269	351	439	319	298	374	410	392	430	542	454	517	645	537
20	ENSG00000092841	myosin, light chain 6, alkali, smooth muscle and non-muscle	MYL6	589	869	0.6	ENSG00000092841	-0.212	-0.322	-1.032	-0.825	-0.174	-0.213	0.875	-0.07	-0.247	-1.008	1.498	0.604	1.356	0.745	1.257	0.27	1.716	0.07	ENSG00000092841	MYL6	589	869	0.6	0.3	695	665	469	526	705	695	994	734	685	476	1165	919	1126	958	1099	827	1225	773
20	ENSG00000196465	myosin, light chain 6B, alkali, smooth muscle and non-muscle	MYL6B	7	12	0.7	ENSG00000196465	0	-1.092	-1.156	-1.317	-1.092	0.739	0	-0.546	0.321	-0.771	0.61	0.899	6.488	1.445	-0.032	0.546	0.385	-0.161	ENSG00000196465	MYL6B	7	12	0.7	0.5	10	7	6	6	7	12	10	8	11	8	12	13	30	14	10	12	11	9
20	ENSG00000104805	nucleobindin 1	NUCB1	71	97	0.5	ENSG00000104805	-1.316	-0.019	-1.555	-1.649	-0.974	-0.674	0.131	-0.674	0.019	0.15	0.941	-0.342	0.834	0.96	1.368	0.033	-0.019	0.3	ENSG00000104805	NUCB1	71	97	0.5	0.2	67	94	62	60	74	80	98	80	95	98	115	88	113	115	124	96	94	101
20	ENSG00000070081	nucleobindin 2	NUCB2	73	92	0.3	ENSG00000070081	-1.202	0.904	-0.89	-1.359	-0.582	-0.466	0.004	0.018	-0.869	-0.456	0.06	0.333	-0.004	1.479	-1.03	2.355	0.256	0.767	ENSG00000070081	NUCB2	73	92	0.3	0.3	57	117	66	53	75	78	92	92	67	78	93	101	91	134	62	159	99	113
20	ENSG00000162517	penta-EF-hand domain containing 1	PEF1	18	25	0.5	ENSG00000162517	-0.478	-0.056	-1.911	-0.618	0.056	-0.534	-0.45	1.321	2.389	-0.084	-0.731	-0.562	1.967	3.288	3.176	0.59	3.26	3.513	ENSG00000162517	PEF1	18	25	0.5	0.3	19	20	14	18	21	19	19	25	29	20	18	18	27	32	32	23	32	33
20	ENSG00000126858	ras homolog gene family, member T1	RHOT1	10	15	0.6	ENSG00000126858	-1.361	-0.674	-1.19	-1.067	-1.018	0.012	-0.724	0.993	0.674	-0.11	0.356	-0.012	0.674	0.674	0.356	0.454	-0.135	0.846	ENSG00000126858	RHOT1	10	15	0.6	0.2	8	11	9	10	10	14	11	18	17	13	15	14	17	17	15	16	13	17
20	ENSG00000115415	signal transducer and activator of transcription 1, 91kDa	STAT1	59	166	1.5	ENSG00000115415	-1.033	-0.58	-0.674	-0.675	-0.488	-0.711	-0.338	0.305	1.557	-0.063	0.625	-0.388	1.011	1.724	1.414	0.063	1.132	1.153	ENSG00000115415	STAT1	59	166	1.5	0.5	33	74	65	65	82	62	95	152	263	119	180	91	215	278	250	131	225	227
20	ENSG00000170581	signal transducer and activator of transcription 2, 113kDa	STAT2	21	43	1	ENSG00000170581	-0.707	0.717	-0.169	-0.558	-0.806	-0.338	-0.284	1.956	4.978	2.673	-0.194	0.05	1.105	1.085	1.2	-0.05	-0.08	0.642	ENSG00000170581	STAT2	21	43	1	0.8	10	39	21	13	8	18	19	64	125	78	21	26	47	46	49	24	23	37
20	ENSG00000075142	sorcin	SRI	48	67	0.5	ENSG00000075142	-0.872	-0.313	-1.206	-1.3	-0.674	-0.115	0.071	-0.219	-0.066	-0.943	0.696	0.592	0.066	1.338	0.713	0.274	0.834	0.674	ENSG00000075142	SRI	48	67	0.5	0.2	49	59	42	41	52	62	66	60	63	47	77	75	66	89	77	69	80	77
20	ENSG00000088992	tescalcin	TESC	5	14	1.6	ENSG00000088992	-0.159	-0.608	-0.754	-0.754	0.331	-0.436	0	0.397	0.026	-0.741	1.27	1.217	2.381	0	3.782	-0.013	1.071	-0.767	ENSG00000088992	TESC	5	14	1.6	0.8	8	4	3	3	12	6	9	12	9	3	19	18	27	9	38	9	17	3
21	Thioredoxin	GENE NAME	Symbol	avgCON	avgAFF	log(a/c)	ENSG	N048	N068	N090	N098	L005	L137	L101	L062	L149	L140	L031	L072	L133	L074	L078	L102	L115	L027	pureENSG	gene	avgCON	avgAFF	log(a/c)	CV	N048	N068	N090	N098	L005	L137	L101	L062	L149	L140	L031	L072	L133	L074	L078	L102	L115	L027
21	ENSG00000077232	DnaJ (Hsp40) homolog, subfamily C, member 10	DNAJC10	12	20	0.7	ENSG00000077232	-1.054	-0.023	-1.009	-1.213	-0.862	-0.964	-0.476	0.249	0.351	-0.703	0.816	0.079	-0.045	1.247	0.521	0.023	0.646	0.896	ENSG00000077232	DNAJC10	12	20	0.7	0.4	10	19	10	8	12	11	15	21	22	13	26	20	19	30	24	19	25	27
21	ENSG00000131171	SH3 domain binding glutamic acid-rich protein like	SH3BGRL	79	118	0.6	ENSG00000131171	-0.83	-0.913	-1.254	-1.244	0.085	-0.349	0.599	-0.292	-0.609	-1.281	1.928	0.032	0.068	0.71	1.932	-0.032	0.8	0.639	ENSG00000131171	SH3BGRL	79	118	0.6	0.3	86	83	73	73	113	100	128	102	92	72	168	111	113	132	168	110	134	130
21	ENSG00000142669	SH3 domain binding glutamic acid-rich protein like 3	SH3BGRL3	275	401	0.5	ENSG00000142669	-0.394	-0.326	-0.822	-0.869	-0.002	-0.079	1.783	-0.102	0.002	-1.146	3.3	1.564	0.527	1.316	3.025	-0.076	1.775	0.359	ENSG00000142669	SH3BGRL3	275	401	0.5	0.3	295	301	255	251	331	324	496	322	331	225	636	475	380	453	610	324	495	364
21	ENSG00000156709	apoptosis-inducing factor, mitochondrion-associated, 1	AIFM1	9	14	0.7	ENSG00000156709	-1.733	0.384	-1.663	-1.663	-1.43	-1.291	-0.733	-0.035	0.267	-0.616	-0.267	0.035	2.082	0.942	0.733	0.221	0.244	0.616	ENSG00000156709	AIFM1	9	14	0.7	0.3	7	16	7	7	8	8	11	14	15	11	13	14	23	18	17	15	15	17
21	ENSG00000169583	chloride intracellular channel 3	CLIC3	4	15	1.8	ENSG00000169583	-0.792	-0.976	-0.976	-0.635	-1.107	-0.57	-0.674	1.251	0.347	1.12	1.133	0.02	0.674	-0.02	2.534	0.19	0.57	-0.072	ENSG00000169583	CLIC3	4	15	1.8	0.6	5	3	3	6	2	6	6	20	13	19	19	11	16	11	30	12	15	10
21	ENSG00000173221	glutaredoxin (thioltransferase)	GLRX	34	61	0.8	ENSG00000173221	-0.698	0.651	-0.794	-0.72	-0.542	-0.416	-0.258	0.219	-0.169	-0.243	0.061	-0.061	0.841	1.274	0.972	0.821	0.898	0.903	ENSG00000173221	GLRX	34	61	0.8	0.5	21	76	17	20	28	33	39	58	43	40	52	47	84	101	89	83	86	86
21	ENSG00000148834	glutathione S-transferase omega 1	GSTO1	30	50	0.7	ENSG00000148834	-0.757	-0.201	-0.889	-0.706	-0.218	-0.643	0.201	-0.244	-0.257	-0.787	0.214	0.477	0.825	1.771	1.186	0.494	0.791	0.817	ENSG00000148834	GSTO1	30	50	0.7	0.4	27	40	24	28	40	30	50	39	39	26	50	56	64	87	73	57	64	64
21	ENSG00000084207	glutathione S-transferase pi 1	GSTP1	82	123	0.6	ENSG00000084207	-0.058	-0.474	-1.285	-0.659	0.058	-0.781	0.437	-0.562	-0.311	-0.374	2.54	0.69	1.682	0.818	2.759	0.728	1.46	-0.108	ENSG00000084207	GSTP1	82	123	0.6	0.3	100	87	61	81	104	77	116	84	92	90	183	124	156	128	190	125	149	99
21	ENSG00000117450	peroxiredoxin 1	PRDX1	61	102	0.7	ENSG00000117450	-1.072	-0.163	-1.387	-1.279	-0.306	-0.507	0.351	-0.434	0.147	-1.394	0.749	0.533	1.623	1.416	2.07	-0.147	1.174	0.6	ENSG00000117450	PRDX1	61	102	0.7	0.3	58	86	48	51	82	76	102	78	96	48	115	108	142	136	156	87	128	110
21	ENSG00000165672	peroxiredoxin 3	PRDX3	15	26	0.8	ENSG00000165672	-0.794	-0.028	-0.674	-0.703	-0.091	-0.899	-0.66	-0.344	0.246	-0.703	0.211	0.028	1.806	1.138	1.075	0.674	0.738	0.049	ENSG00000165672	PRDX3	15	26	0.8	0.5	11	22	13	13	21	10	13	18	26	13	26	23	48	39	38	32	33	23
21	ENSG00000123131	peroxiredoxin 4	PRDX4	11	22	1.1	ENSG00000123131	-0.606	-0.697	-1.096	-1.403	-0.422	-0.314	-0.13	-0.345	0.468	-0.376	2.046	1.096	3.211	3.457	1.357	0.13	2.552	0.651	ENSG00000123131	PRDX4	11	22	1.1	0.5	13	12	10	8	14	15	16	14	20	14	30	24	38	39	26	18	33	21
21	ENSG00000126432	peroxiredoxin 5	PRDX5	67	106	0.6	ENSG00000126432	-0.459	-0.275	-1.689	-1.595	-1.038	0.121	0.311	-0.581	-0.678	-0.905	1.509	0.671	1.455	1.124	0.405	-0.121	2.948	0.66	ENSG00000126432	PRDX5	67	106	0.6	0.3	83	88	48	51	66	99	104	79	76	70	137	114	136	127	107	92	177	114
21	ENSG00000185624	prolyl 4-hydroxylase, beta polypeptide	P4HB	219	298	0.4	ENSG00000185624	-0.248	-0.708	-0.968	-0.641	-0.1	0.1	0.985	-0.62	-0.245	-0.849	2.195	0.162	1.679	0.958	1.307	0.716	0.275	-0.461	ENSG00000185624	P4HB	219	298	0.4	0.3	250	213	193	219	262	278	348	220	250	202	445	283	404	346	374	327	292	233
21	ENSG00000155660	protein disulfide isomerase family A, member 4	PDIA4	27	47	0.8	ENSG00000155660	-0.744	0.243	-1.101	-1.165	-0.833	-0.541	-0.139	0.03	0.193	-0.605	1.324	0.957	1.939	1.716	0.918	-0.04	-0.03	0.169	ENSG00000155660	PDIA4	27	47	0.8	0.4	26	46	18	17	24	30	38	41	45	28	67	60	80	75	59	40	40	44
21	ENSG00000143870	protein disulfide isomerase family A, member 6	PDIA6	38	73	0.9	ENSG00000143870	-0.654	-0.695	-1.285	-1.108	-0.171	-0.415	0.08	-0.394	0.415	-1.355	3.381	0.877	1.17	1.887	1.949	0.184	0.547	-0.08	ENSG00000143870	PDIA6	38	73	0.9	0.4	45	44	30	34	57	51	63	51	71	28	143	82	89	107	108	65	74	59
21	ENSG00000136810	thioredoxin	TXN	37	66	0.8	ENSG00000136810	-0.681	-0.965	-1.045	-0.872	-0.681	0.111	0.221	-0.668	-0.111	-1.076	1.169	0.197	1.107	0.339	0.37	0.152	0.934	-0.287	ENSG00000136810	TXN	37	66	0.8	0.3	43	35	32	37	43	66	69	43	59	32	96	68	95	72	73	67	90	54
21	ENSG00000100348	thioredoxin 2	TXN2	42	60	0.5	ENSG00000100348	-1.105	0.185	-1.464	-1.277	-0.383	-0.699	0.763	-0.65	-0.763	-0.533	0.602	-0.174	0.474	0.265	0.699	0.913	0.816	0.174	ENSG00000100348	TXN2	42	60	0.5	0.2	38	63	32	35	52	46	73	47	45	49	70	56	68	64	72	76	74	62
21	ENSG00000117862	thioredoxin domain containing 12 (endoplasmic reticulum)	TXNDC12	23	32	0.5	ENSG00000117862	-0.76	-0.214	-1.049	-0.91	-0.589	-0.407	0.525	-0.107	-0.343	-0.792	0.942	0.171	0.589	0.91	0.76	0.107	1.488	0.782	ENSG00000117862	TXNDC12	23	32	0.5	0.2	23	28	20	21	24	26	35	29	27	22	39	31	35	38	37	31	44	37
21	ENSG00000113621	thioredoxin domain containing 15	TXNDC15	8	13	0.7	ENSG00000113621	-1.137	-0.137	-1.287	-0.712	-0.637	-0.437	-0.937	-0.437	0.137	0.337	1.237	0.212	1.911	2.436	0.812	-0.412	1.137	0.612	ENSG00000113621	TXNDC15	8	13	0.7	0.3	7	11	6	8	9	10	8	10	12	13	16	12	19	21	15	10	16	14
21	ENSG00000129235	thioredoxin domain containing 17	TXNDC17	17	27	0.7	ENSG00000129235	-0.568	-0.629	-1.023	-0.705	-0.644	-0.826	-0.28	0.053	0.462	-2.084	1.417	0.25	7.313	2.857	2.387	0.402	0.735	-0.053	ENSG00000129235	TXNDC17	17	27	0.7	0.5	18	18	15	18	18	17	20	23	25	8	32	24	70	41	38	25	27	22
21	ENSG00000091164	thioredoxin-like 1	TXNL1	22	29	0.4	ENSG00000091164	-1.254	-0.048	-1.27	-1.301	-0.302	-0.111	0.048	-0.746	-0.603	-1.651	1.127	0.143	0.429	1.762	0.413	0.222	1.016	1.476	ENSG00000091164	TXNL1	22	29	0.4	0.2	20	28	20	20	26	28	29	24	25	18	35	29	31	39	31	30	35	38
21	ENSG00000139921	thioredoxin-related transmembrane protein 1	TMX1	11	17	0.6	ENSG00000139921	-1.262	-0.472	-0.607	-0.646	-0.26	-1.166	-0.703	0.53	1.224	-1.513	0.202	-0.01	0.646	1.301	2.187	0.01	1.108	1.725	ENSG00000139921	TMX1	11	17	0.6	0.3	9	13	12	12	14	9	12	18	22	7	16	15	19	22	27	15	21	24
22	Small GTP Binding	GENE NAME	Symbol	avgCON	avgAFF	log(a/c)	ENSG	N048	N068	N090	N098	L005	L137	L101	L062	L149	L140	L031	L072	L133	L074	L078	L102	L115	L027	pureENSG	gene	avgCON	avgAFF	log(a/c)	CV	N048	N068	N090	N098	L005	L137	L101	L062	L149	L140	L031	L072	L133	L074	L078	L102	L115	L027
22	ENSG00000134287	ADP-ribosylation factor 3	ARF3	39	60	0.6	ENSG00000134287	-0.682	-0.502	-1.564	-1.492	-0.603	-0.538	0.703	0.344	-0.187	-0.732	2.016	-0.337	1.385	0.875	2.526	0.187	0.359	0.667	ENSG00000134287	ARF3	39	60	0.6	0.3	45	47	32	33	46	47	64	59	52	44	82	50	74	66	89	57	59	64
22	ENSG00000101246	ADP-ribosylation factor related protein 1	ARFRP1	18	21	0.2	ENSG00000101246	-0.976	1.313	-0.812	-0.884	-1.119	-0.956	-0.69	0.118	0.261	0.434	-0.659	-0.026	-0.148	0.445	0.087	0.026	0.966	0.864	ENSG00000101246	ARFRP1	18	21	0.2	0.3	12	34	13	12	10	12	14	22	24	25	15	21	20	25	22	21	31	30
22	ENSG00000120805	ADP-ribosylation factor-like 1	ARL1	13	15	0.2	ENSG00000120805	-0.689	-0.66	0.23	0.373	0.172	-1.205	-0.804	-0.057	0.057	-1.205	-0.201	-0.459	2.841	1.722	0.918	-0.144	1.866	1.205	ENSG00000120805	ARL1	13	15	0.2	0.3	11	11	14	15	14	9	11	13	14	9	13	12	24	20	17	13	20	18
22	ENSG00000213465	ADP-ribosylation factor-like 2	ARL2	19	29	0.6	ENSG00000213465	-1.295	0.648	-1.875	-1.808	-1.201	-0.243	0.013	-0.189	-0.58	0.513	0.202	0.701	-0.108	0.998	-0.013	0.917	2.604	1.012	ENSG00000213465	ARL2	19	29	0.6	0.3	18	32	13	14	18	25	27	26	23	31	29	32	26	35	27	34	47	35
22	ENSG00000162980	ADP-ribosylation factor-like 5A	ARL5A	14	20	0.6	ENSG00000162980	-0.391	-0.881	-0.713	-0.958	-0.023	-0.636	-0.268	-0.084	0.084	-1.065	1.203	0.023	1.495	1.525	1.004	0.069	1.525	0.314	ENSG00000162980	ARL5A	14	20	0.6	0.3	16	13	14	12	18	14	17	18	19	11	26	18	28	28	25	19	28	20
22	ENSG00000084733	RAB10, member RAS oncogene family	RAB10	14	25	0.9	ENSG00000084733	-0.942	0.339	-0.784	-0.695	-0.709	-0.818	-0.654	0.188	0.483	-0.428	-0.264	-0.188	0.921	1.079	2.263	0.236	0.64	0.825	ENSG00000084733	RAB10	14	25	0.9	0.5	8	26	10	11	11	9	12	24	28	15	18	19	35	37	54	25	31	33
22	ENSG00000103769	RAB11A, member RAS oncogene family	RAB11A	57	75	0.4	ENSG00000103769	-0.334	-0.185	-1.542	-1.164	-0.022	-0.563	0.022	-0.119	0.482	-1.371	0.571	-0.252	1.431	2.298	2.335	0.778	2.253	1.171	ENSG00000103769	RAB11A	57	75	0.4	0.2	63	65	47	52	67	60	68	66	74	49	75	64	87	99	99	78	98	83
22	ENSG00000069974	RAB27A, member RAS oncogene family	RAB27A	27	41	0.6	ENSG00000069974	-1.213	-1.198	-0.61	-1.289	-0.528	-1.138	0.181	-0.06	0.437	-1.485	2.366	0.241	0.264	1.726	0.761	0.151	0.06	-0.739	ENSG00000069974	RAB27A	27	41	0.6	0.3	25	25	33	24	34	26	43	40	47	21	72	44	45	64	51	43	42	31
22	ENSG00000172794	RAB37, member RAS oncogene family	RAB37	30	41	0.5	ENSG00000172794	-0.771	-0.14	-0.721	-0.771	-0.664	-0.427	0.14	0.248	0.987	-0.585	1.051	0.972	0.434	1.051	0.685	-0.434	0.7	-0.24	ENSG00000172794	RAB37	30	41	0.5	0.2	27	36	28	27	29	32	40	41	52	30	53	52	44	53	48	32	48	35
22	ENSG00000167578	RAB4B, member RAS oncogene family	RAB4B	24	32	0.4	ENSG00000167578	-0.725	0.137	-1.253	-0.989	-1.05	-1.029	-0.867	0.39	0.938	0.908	-0.005	0.005	0.167	0.624	0.401	-0.289	1.242	-0.177	ENSG00000167578	RAB4B	24	32	0.4	0.2	24	32	18	21	20	21	22	35	40	40	31	31	32	37	35	28	43	29
22	ENSG00000111540	RAB5B, member RAS oncogene family	RAB5B	28	35	0.4	ENSG00000111540	-1.198	0.507	-0.909	-1.076	-0.585	-0.875	0.039	0.418	-0.173	-0.229	0.875	-0.318	-0.039	1.198	1.421	0.764	0.295	0.864	ENSG00000111540	RAB5B	28	35	0.4	0.2	23	38	25	24	28	26	34	37	32	32	41	31	33	44	46	40	36	41
22	ENSG00000117280	RAB7, member RAS oncogene family-like 1	RAB7L1	21	32	0.6	ENSG00000117280	-1.354	-0.417	-0.267	-1.026	-0.614	-0.867	-0.417	0.098	0.632	-0.763	0.763	0.145	0.511	0.885	0.998	-0.098	1.054	0.717	ENSG00000117280	RAB7L1	21	32	0.6	0.3	15	25	27	19	23	20	25	31	36	21	38	31	35	39	40	29	41	37
22	ENSG00000108883	elongation factor Tu GTP binding domain containing 2	EFTUD2	27	35	0.3	ENSG00000108883	-1.642	0.129	-0.587	-0.633	-1.501	-1.701	-0.434	0.762	1.22	-0.164	0.012	-0.035	0.716	1.021	1.842	0.493	-0.012	0.751	ENSG00000108883	EFTUD2	27	35	0.3	0.2	19	34	28	28	20	19	30	40	44	32	33	33	39	42	49	37	33	40
22	ENSG00000067560	ras homolog gene family, member A	RHOA	234	335	0.5	ENSG00000067560	-0.719	-0.672	-1.141	-1.41	-0.198	-0.282	0.564	-0.387	-0.552	-1.389	1.933	0.198	0.677	1.31	2.452	0.358	1.069	0.426	ENSG00000067560	RHOA	234	335	0.5	0.3	254	258	223	202	293	287	350	279	267	204	453	323	359	406	492	335	388	340
22	ENSG00000143878	ras homolog gene family, member B	RHOB	10	23	1.3	ENSG00000143878	0.663	-0.633	-0.701	-0.86	-0.254	-0.087	-0.405	0.686	-0.049	-0.549	0.997	1.262	4.134	1.133	2.171	0.216	0.049	-0.769	ENSG00000143878	RHOB	10	23	1.3	0.8	23	6	5	3	11	13	9	24	14	7	28	31	69	30	43	17	15	4
22	ENSG00000155366	ras homolog gene family, member C	RHOC	28	61	1.1	ENSG00000155366	0.08	-1.114	-1.364	-1.09	0.395	-0.55	-0.08	0.799	-0.157	-1.275	2.879	1.703	1.197	0.318	8.869	-0.449	0.264	-0.496	ENSG00000155366	RHOC	28	61	1.1	0.7	44	24	20	24	49	34	41	56	40	21	91	71	63	48	192	35	47	34
22	ENSG00000126858	ras homolog gene family, member T1	RHOT1	10	15	0.6	ENSG00000126858	-1.361	-0.674	-1.19	-1.067	-1.018	0.012	-0.724	0.993	0.674	-0.11	0.356	-0.012	0.674	0.674	0.356	0.454	-0.135	0.846	ENSG00000126858	RHOT1	10	15	0.6	0.2	8	11	9	10	10	14	11	18	17	13	15	14	17	17	15	16	13	17
22	ENSG00000128340	ras-related C3 botulinum toxin substrate 2 (rho family, small GTP binding protein Rac2)	RAC2	301	520	0.8	ENSG00000128340	-1.478	0.386	-1.46	-1.536	-1.15	-0.853	-0.145	-0.327	-0.31	-0.624	0.413	0.145	0.273	1.136	1.646	0.674	1.185	0.675	ENSG00000128340	RAC2	301	520	0.8	0.4	216	565	219	205	277	333	465	431	434	376	570	520	544	705	801	619	714	619
22	ENSG00000126458	related RAS viral (r-ras) oncogene homolog	RRAS	11	20	0.9	ENSG00000126458	-0.83	-0.374	-1.474	-1.494	-0.643	0.062	-0.145	0.166	-0.021	-0.706	0.166	1.577	1.909	0.809	7.658	-0.768	0.021	0.291	ENSG00000126458	RRAS	11	20	0.9	0.5	12	14	9	9	13	16	15	17	16	12	17	23	25	20	53	12	16	17
22	ENSG00000144118	v-ral simian leukemia viral oncogene homolog B (ras related; GTP binding protein)	RALB	10	22	1.1	ENSG00000144118	-0.845	-0.176	-0.811	-1.071	-0.572	-0.606	-0.142	-0.119	0.414	-0.708	0.119	0.266	0.64	1.309	3.611	1.241	1.774	0.777	ENSG00000144118	RALB	10	22	1.1	0.5	9	15	9	7	12	11	15	16	20	10	18	19	22	28	48	28	32	23
23	Nucleic Acid binding OB	GENE NAME	Symbol	avgCON	avgAFF	log(a/c)	ENSG	N048	N068	N090	N098	L005	L137	L101	L062	L149	L140	L031	L072	L133	L074	L078	L102	L115	L027	pureENSG	gene	avgCON	avgAFF	log(a/c)	CV	N048	N068	N090	N098	L005	L137	L101	L062	L149	L140	L031	L072	L133	L074	L078	L102	L115	L027
23	ENSG00000115866	aspartyl-tRNA synthetase	DARS	38	54	0.5	ENSG00000115866	-1.805	-0.14	-1.489	-0.986	0.251	-0.651	-0.809	-0.391	-0.447	0.307	0.698	-0.53	0.344	1.033	0.14	2.14	1.703	1.535	ENSG00000115866	DARS	38	54	0.5	0.2	30	48	34	39	52	43	41	45	45	53	57	44	53	61	51	73	68	66
23	ENSG00000134001	eukaryotic translation initiation factor 2, subunit 1 alpha, 35kDa	EIF2S1	31	43	0.5	ENSG00000134001	-1.025	-0.265	-0.743	-0.239	0.939	-0.051	-0.7	-0.102	0.051	-1.417	0.06	-0.461	2.237	2.1	1.178	0.188	0.649	2.237	ENSG00000134001	EIF2S1	31	43	0.5	0.3	26	35	29	35	49	37	30	37	38	21	39	32	64	62	52	40	45	64
23	ENSG00000112118	minichromosome maintenance complex component 3	MCM3	17	27	0.7	ENSG00000112118	-0.928	0.587	-0.865	-0.897	-0.674	-0.928	-0.317	0.357	0.833	-0.087	-0.103	0.087	2.523	0.913	0.801	0.674	-0.183	0.643	ENSG00000112118	MCM3	17	27	0.7	0.4	12	31	12	12	15	12	19	28	34	22	22	24	55	35	33	32	21	31
23	ENSG00000104738	minichromosome maintenance complex component 4	MCM4	8	15	0.9	ENSG00000104738	-0.143	0.272	-1.025	-0.246	-0.324	-0.48	-0.065	0.013	3.723	-0.013	1.959	0.065	11.479	2.555	2.867	1.258	-1.206	-0.869	ENSG00000104738	MCM4	8	15	0.9	0.8	9	10	5	8	8	8	9	9	24	9	17	10	54	19	20	14	5	6
23	ENSG00000100297	minichromosome maintenance complex component 5	MCM5	30	39	0.4	ENSG00000100297	-0.3	-0.869	-0.075	0.075	-0.555	-0.57	-0.36	0.525	1.169	-0.585	1.634	0.689	10.912	1.814	2.623	0.66	-1.394	-1.079	ENSG00000100297	MCM5	30	39	0.4	0.5	30	26	31	32	28	28	29	35	39	28	42	36	104	44	49	36	22	24
23	ENSG00000139579	oligonucleotide/oligosaccharide-binding fold containing 2B	NABP2	10	18	0.9	ENSG00000139579	-0.793	-0.738	-1.413	-1.23	-0.629	0.118	0.1	-0.082	-0.118	-0.72	1.322	0.082	3.145	0.757	1.066	0.21	0.629	-0.1	ENSG00000139579	NABP2	10	18	0.9	0.4	11	12	8	9	12	16	16	15	15	12	23	16	33	20	21	17	19	15
23	ENSG00000168002	polymerase (RNA) II (DNA directed) polypeptide G	POLR2G	43	63	0.5	ENSG00000168002	-2.071	-0.531	-1.88	-1.845	-1.654	-1.358	-0.052	0.052	-0.139	-1.218	0.818	0.27	1.601	0.374	0.531	0.244	1.976	0.122	ENSG00000168002	POLR2G	43	63	0.5	0.2	38	55	40	40	42	46	61	62	60	47	71	64	80	66	67	64	84	63
23	ENSG00000132383	replication protein A1, 70kDa	RPA1	38	56	0.6	ENSG00000132383	-1.422	0.213	-0.765	-1.231	-0.514	-1.141	-0.138	-0.043	0.048	-0.835	0.584	-0.323	0.043	1.081	1.081	0.93	0.113	1.196	ENSG00000132383	RPA1	38	56	0.6	0.3	26	58	39	30	44	31	51	53	55	38	66	48	55	76	76	73	56	78
23	ENSG00000117748	replication protein A2, 32kDa	RPA2	35	49	0.5	ENSG00000117748	-1.093	0.471	-0.642	-0.707	-0.78	-0.849	-0.313	0.114	-0.179	-0.918	-0.114	0.142	0.52	0.841	0.809	0.333	0.951	0.833	ENSG00000117748	RPA2	35	49	0.5	0.4	21	59	32	30	28	27	40	50	43	25	45	51	60	68	67	56	71	68
23	ENSG00000106399	replication protein A3, 14kDa	RPA3	20	26	0.3	ENSG00000106399	-0.769	-0.638	-0.783	0.116	-0.319	-0.522	-0.914	-0.711	-0.116	-1.117	0.435	0.45	2.321	1.349	0.798	0.276	1.218	0.58	ENSG00000106399	RPA3	20	26	0.3	0.3	18	19	18	25	22	20	17	19	23	16	27	27	40	33	29	26	32	28
23	ENSG00000106028	single-stranded DNA binding protein 1	SSBP1	66	94	0.5	ENSG00000106028	-1.553	0.012	-1.468	-1.74	-1.426	0.185	-0.471	-0.208	-0.227	-0.878	0.391	0.124	1.108	0.967	0.358	-0.012	1.567	0.93	ENSG00000106028	SSBP1	66	94	0.5	0.2	58	91	60	54	61	95	81	87	86	72	99	94	115	112	99	91	124	111
23	ENSG00000134684	tyrosyl-tRNA synthetase	YARS	25	34	0.5	ENSG00000134684	-1.154	-0.302	-0.186	-0.484	-0.997	-0.79	-0.807	0.699	2.081	1.188	0.294	-0.153	0.65	0.741	0.153	-0.732	0.277	0.178	ENSG00000134684	YARS	25	34	0.5	0.3	17	28	29	25	19	22	22	40	56	46	35	29	39	40	33	22	35	33
24	Short Chain Dehydrog	GENE NAME	Symbol	avgCON	avgAFF	log(a/c)	ENSG	N048	N068	N090	N098	L005	L137	L101	L062	L149	L140	L031	L072	L133	L074	L078	L102	L115	L027	pureENSG	gene	avgCON	avgAFF	log(a/c)	CV	N048	N068	N090	N098	L005	L137	L101	L062	L149	L140	L031	L072	L133	L074	L078	L102	L115	L027
24	ENSG00000104325	2,4-dienoyl CoA reductase 1, mitochondrial	DECR1	31	45	0.5	ENSG00000104325	-1.107	-0.078	-1.141	-1.34	-0.709	-0.398	-0.121	0.078	0.527	-0.951	0.994	0.112	2.24	1.349	1.314	0.64	-0.294	0.268	ENSG00000104325	DECR1	31	45	0.5	0.3	29	41	28	26	33	37	40	42	48	31	53	43	67	57	57	49	38	45
24	ENSG00000159228	carbonyl reductase 1	CBR1	8	14	0.8	ENSG00000159228	-0.909	0.381	-0.909	-1.32	-0.674	-0.342	0.127	-0.42	-0.029	-0.674	-0.108	0.029	1.769	1.652	3.196	0.401	1.085	0.948	ENSG00000159228	CBR1	8	14	0.8	0.4	7	14	7	5	9	10	13	10	12	9	11	12	21	20	28	14	18	17
24	ENSG00000157326	dehydrogenase/reductase (SDR family) member 4	DHRS4	15	21	0.5	ENSG00000157326	-0.808	-0.577	-1.535	-1.145	-0.524	0.275	0.399	-0.737	-0.79	-0.151	0.328	-0.737	0.861	0.577	0.151	0.612	1.784	0.95	ENSG00000157326	DHRS4	15	21	0.5	0.2	16	17	12	14	17	22	23	16	16	19	22	16	25	24	21	24	30	26
24	ENSG00000100612	dehydrogenase/reductase (SDR family) member 7	DHRS7	36	52	0.5	ENSG00000100612	-0.684	-0.665	-0.352	-1.088	0.033	-0.274	0.28	-0.033	-0.235	-1.408	1.962	0.86	-1.193	1.219	2.19	0.534	0.567	1.147	ENSG00000100612	DHRS7	36	52	0.5	0.3	37	37	42	30	48	43	51	47	43	25	77	60	29	66	81	55	56	65
24	ENSG00000149084	hydroxysteroid (17-beta) dehydrogenase 12	HSD17B12	11	13	0.3	ENSG00000149084	-1.067	-0.659	-0.125	0.125	0.69	-0.722	-0.251	0.282	-0.376	-0.659	1.725	0.157	-1.161	4.329	-0.659	1.067	3.137	1.474	ENSG00000149084	HSD17B12	11	13	0.3	0.3	9	10	12	12	14	10	11	13	11	10	18	13	8	26	10	15	22	17
24	ENSG00000133835	hydroxysteroid (17-beta) dehydrogenase 4	HSD17B4	14	23	0.7	ENSG00000133835	-0.844	0.971	-0.717	-0.703	-0.745	-0.533	-0.109	0.752	0.046	-0.074	-0.046	-0.06	0.674	0.639	0.632	1.197	0.674	0.999	ENSG00000133835	HSD17B4	14	23	0.7	0.4	7	33	9	9	8	11	17	30	20	18	18	18	28	28	28	36	28	33
24	ENSG00000151552	quinoid dihydropteridine reductase	QDPR	11	15	0.6	ENSG00000151552	-1.733	-0.225	-1.442	-0.807	-0.701	-0.119	-0.569	-0.648	0.119	0.119	0.939	-0.436	1.468	1.415	0.331	0.331	0.913	0.701	ENSG00000151552	QDPR	11	15	0.6	0.2	8	14	9	11	12	14	12	12	15	15	18	13	20	20	16	16	18	17
24	ENSG00000072042	retinol dehydrogenase 11 (all-trans/9-cis/11-cis)	RDH11	14	21	0.6	ENSG00000072042	-1.763	0.236	-1.682	-1.812	-1.585	-1.406	-1.146	0.138	0.219	-1	-0.252	0.024	0.496	1.471	0.496	0.561	-0.024	0.788	ENSG00000072042	RDH11	14	21	0.6	0.3	11	23	12	11	12	13	15	23	23	16	20	22	25	31	25	25	22	27
24	ENSG00000116171	sterol carrier protein 2	SCP2	49	80	0.7	ENSG00000116171	-1.337	-0.414	-1.321	-1.294	-0.647	-0.738	0.237	-0.189	-0.087	-1.246	1.097	0.087	0.158	0.702	1.219	0.229	1.116	0.536	ENSG00000116171	SCP2	49	80	0.7	0.3	42	66	43	44	60	58	82	72	74	45	104	79	80	94	107	82	105	90
25	Proteosomal Subunut AB	GENE NAME	Symbol	avgCON	avgAFF	log(a/c)	ENSG	N048	N068	N090	N098	L005	L137	L101	L062	L149	L140	L031	L072	L133	L074	L078	L102	L115	L027	pureENSG	gene	avgCON	avgAFF	log(a/c)	CV	N048	N068	N090	N098	L005	L137	L101	L062	L149	L140	L031	L072	L133	L074	L078	L102	L115	L027
25	ENSG00000106588	proteasome (prosome, macropain) subunit, alpha type, 2	PSMA2	63	80	0.3	ENSG00000106588	-0.54	-1.005	-1.268	-0.994	0.199	-0.803	-0.048	-1.072	-0.546	-2.566	0.949	0.048	2.32	1.257	0.473	0.311	0.372	0.417	ENSG00000106588	PSMA2	63	80	0.3	0.2	70	62	57	62	84	66	79	61	70	34	97	81	122	103	89	86	87	88
25	ENSG00000041357	proteasome (prosome, macropain) subunit, alpha type, 4	PSMA4	57	80	0.5	ENSG00000041357	-0.671	-0.814	-0.942	-0.799	0.151	-0.414	-0.196	-0.173	1.635	-2.125	0.678	0.143	6.918	1.439	3.572	0.083	0.362	-0.083	ENSG00000041357	PSMA4	57	80	0.5	0.4	59	57	55	57	70	62	65	65	89	39	77	70	159	87	115	69	72	67
25	ENSG00000143106	proteasome (prosome, macropain) subunit, alpha type, 5	PSMA5	31	67	1.1	ENSG00000143106	-1.064	-0.249	-1.022	-1.073	-0.926	-0.683	-0.588	-0.075	0.345	-0.665	0.357	0.075	1.877	1.235	0.788	0.126	0.788	0.549	ENSG00000143106	PSMA5	31	67	1.1	0.5	24	51	26	24	29	37	40	57	71	38	72	62	122	101	86	64	86	78
25	ENSG00000100902	proteasome (prosome, macropain) subunit, alpha type, 6	PSMA6	60	95	0.7	ENSG00000100902	-0.884	-0.859	-0.877	-0.954	-0.398	-0.633	-0.023	0.023	0.075	-0.85	0.877	0.203	1.613	0.905	0.429	-0.182	0.716	0.316	ENSG00000100902	PSMA6	60	95	0.7	0.3	61	61	61	58	76	69	89	90	92	62	118	96	142	119	104	84	113	100
25	ENSG00000101182	proteasome (prosome, macropain) subunit, alpha type, 7	PSMA7	99	126	0.3	ENSG00000101182	-0.932	-0.456	-1.252	-0.202	-1.484	-0.29	-0.368	0.257	1.175	-0.334	0.495	0.202	3.591	1.965	1.435	-0.528	4.177	0.821	ENSG00000101182	PSMA7	99	126	0.3	0.2	95	104	89	108	85	107	105	117	133	106	121	116	177	148	138	103	188	127
25	ENSG00000205220	proteasome (prosome, macropain) subunit, beta type, 10	PSMB10	82	136	0.7	ENSG00000205220	-1.316	-0.171	-1.199	-1.173	-1.089	-0.923	-0.426	-0.049	0.141	-0.35	0.416	0.185	2.006	1.001	1.196	0.049	1.284	0.35	ENSG00000205220	PSMB10	82	136	0.7	0.3	67	117	72	73	77	84	106	122	130	109	142	132	212	168	176	126	180	140
25	ENSG00000108294	proteasome (prosome, macropain) subunit, beta type, 3	PSMB3	62	96	0.6	ENSG00000108294	-0.712	-0.458	-1.45	-1.093	-0.637	-0.486	0.137	-0.054	0.093	-1.418	1.113	0.522	3.216	1.664	1.438	-0.097	1.593	0.054	ENSG00000108294	PSMB3	62	96	0.6	0.3	67	73	48	57	69	73	88	84	87	49	113	98	166	127	121	82	125	86
25	ENSG00000142507	proteasome (prosome, macropain) subunit, beta type, 6	PSMB6	54	73	0.4	ENSG00000142507	-0.291	-0.958	-1.31	-0.857	-0.291	-0.061	0.061	-0.47	0.083	-1.632	1.898	0.477	3.003	1.726	1.589	-0.492	1.905	0.298	ENSG00000142507	PSMB6	54	73	0.4	0.2	61	52	47	53	61	65	66	59	67	43	92	72	107	89	88	59	92	70
	KEGG and INTERPRO DAVID result for expression reduced at least 1.5x in SLE T cells (control+mild versus severe expression phenotype, Con+0+Af versus B+C comparison)
	Category	Term	Genes	Count	%	P-Value	Benjamini
26	KEGG_PATHWAY	MAPK signaling pathway		17	3	0.0025	0.032
27	KEGG_PATHWAY	Neurotrophin signaling pathway		15	2.7	6.1e-06	0.00071
28	KEGG_PATHWAY	T cell receptor signaling pathway		13	2.3	3.4e-05	0.002
29	KEGG_PATHWAY	Spliceosome		13	2.3	0.00016	0.0061
30	KEGG_PATHWAY	Cell cycle		11	2	0.0022	0.031
31	KEGG_PATHWAY	Chemokine signaling pathway		11	2	0.033	0.15
32	KEGG_PATHWAY	Chronic myeloid leukemia		10	1.8	0.00019	0.0055
33	KEGG_PATHWAY	ErbB signaling pathway		10	1.8	0.00058	0.011
34	KEGG_PATHWAY	Apoptosis		9	1.6	0.0025	0.029
35	KEGG_PATHWAY	Fc epsilon RI signaling pathway		8	1.4	0.0053	0.038
36	KEGG_PATHWAY	Toll-like receptor signaling pathway		8	1.4	0.021	0.11
37	KEGG_PATHWAY	Phosphatidylinositol signaling system		7	1.2	0.016	0.097
38	KEGG_PATHWAY	B cell receptor signaling pathway		7	1.2	0.017	0.093
39	KEGG_PATHWAY	Fc gamma R-mediated phagocytosis		7	1.2	0.046	0.19
40	KEGG_PATHWAY	Circadian rhythm		5	0.9	0.00032	0.0076
41	KEGG_PATHWAY	Aldosterone-regulated sodium reabsorption		5	0.9	0.025	0.13
42	KEGG_PATHWAY	Type II diabetes mellitus		5	0.9	0.039	0.17
43	KEGG_PATHWAY	mTOR signaling pathway		5	0.9	0.054	0.21
26	MAPK	GENE NAME	Symbol	avgCON	avgAFF	log(a/c)	ENSG	N048	N068	N090	N098	L005	L137	L101	L062	L149	L140	L031	L072	L133	L074	L078	L102	L115	L027	pureENSG	gene	avgCON	avgAFF	log(a/c)	CV	N048	N068	N090	N098	L005	L137	L101	L062	L149	L140	L031	L072	L133	L074	L078	L102	L115	L027
26	ENSG00000175197	DNA-damage-inducible transcript 3	DDIT3	19	12	-0.6	ENSG00000175197	1.211	-0.724	0.525	0.945	-0.359	1.355	0.326	0.625	0.149	-0.006	0.083	0.006	-0.547	-0.879	-0.912	-1.012	-1.178	-1.078	ENSG00000175197	DDIT3	19	12	-0.6	0.5	25	8	19	23	11	26	17	20	15	14	15	14	9	6	6	5	3	4
26	ENSG00000138166	dual specificity phosphatase 5	DUSP5	54	31	-0.8	ENSG00000138166	2.903	-1.028	1.024	1.588	1.019	2.291	-0.011	-0.554	0.097	-0.795	-0.075	0.011	0.985	-0.015	0.144	-0.506	-0.222	-0.881	ENSG00000138166	DUSP5	54	31	-0.8	0.7	95	4	51	65	51	81	27	15	30	9	26	28	51	27	31	16	23	7
26	ENSG00000116717	growth arrest and DNA-damage-inducible, alpha	GADD45A	57	17	-1.7	ENSG00000116717	7.53	-0.768	2.57	5.311	2.852	1.964	-0.06	-0.64	-0.009	0.615	-0.12	-0.12	0.35	0.009	-0.546	0.717	-0.709	-0.914	ENSG00000116717	GADD45A	57	17	-1.7	1	102	5	44	76	47	37	13	6	14	21	13	13	18	14	8	22	6	3
26	ENSG00000099860	growth arrest and DNA-damage-inducible, beta	GADD45B	108	58	-0.9	ENSG00000099860	4.756	-0.407	1.8	4.131	0.873	2.678	0.977	-0.198	-0.298	-0.367	0.431	0.818	0.015	-0.015	-0.169	-1.408	-0.531	-1.037	ENSG00000099860	GADD45B	108	58	-0.9	0.5	153	48	93	140	74	111	76	53	51	49	65	73	57	56	53	28	46	36
26	ENSG00000130522	jun D proto-oncogene	JUND	460	209	-1.1	ENSG00000130522	10.076	-0.829	2.068	5.06	2.761	3.219	0.131	-0.412	-0.543	-0.294	-0.43	0.749	0.158	-0.131	-0.6	-1.033	0.149	-1.186	ENSG00000130522	JUND	460	209	-1.1	0.7	847	141	329	523	374	403	204	168	160	176	167	244	205	187	156	128	205	118
26	ENSG00000177606	jun oncogene	JUN	80	43	-0.9	ENSG00000177606	5.244	-1.351	0.388	2.744	-0.344	2.575	0.359	0.344	-1.139	-0.764	-0.108	1.896	-0.07	0.585	-1.269	-0.301	0.07	-1.077	ENSG00000177606	JUN	80	43	-0.9	0.7	152	16	52	101	36	97	51	51	20	28	41	83	42	56	17	37	45	21
26	ENSG00000138834	mitogen-activated protein kinase 8 interacting protein 3	MAPK8IP3	33	23	-0.6	ENSG00000138834	1.289	1.137	2.486	1.912	-0.611	0.331	-0.363	2.486	4.322	6.893	-0.674	0.267	-0.267	-0.627	-0.674	-0.411	-0.754	-0.571	ENSG00000138834	MAPK8IP3	33	23	-0.6	1.1	28	26	43	36	4	16	7	43	66	98	3	15	9	4	3	7	2	5
26	ENSG00000076984	mitogen-activated protein kinase kinase 7	MAP2K7	20	12	-0.7	ENSG00000076984	1.453	0.394	2.656	1.743	0.291	0.104	-0.747	0.623	1.183	1.847	-1.162	-0.54	-0.104	-0.353	-0.706	-0.892	-0.643	-0.311	ENSG00000076984	MAP2K7	20	12	-0.7	0.4	20	14	25	21	14	13	9	16	18	21	7	10	12	11	9	8	9	11
26	ENSG00000095015	mitogen-activated protein kinase kinase kinase 1	MAP3K1	27	24	-0.2	ENSG00000095015	1.129	0.157	0.751	-0.364	0.436	0.787	0.796	1.506	2.172	-0.373	-1.192	0.823	-0.598	-0.211	-0.193	-0.58	-1.138	-0.157	ENSG00000095015	MAP3K1	27	24	-0.2	0.4	35	24	31	18	27	31	31	39	46	18	9	31	16	20	20	16	10	21
26	ENSG00000006062	mitogen-activated protein kinase kinase kinase 14	MAP3K14	17	13	-0.5	ENSG00000006062	0.488	0.26	0.878	0.309	-0.26	0.26	-0.65	0.845	0.699	0.601	-1.593	0.455	-0.569	-1.04	-0.796	-1.056	-1.316	-0.699	ENSG00000006062	MAP3K14	17	13	-0.5	0.4	17	16	20	16	13	16	10	20	19	18	5	17	11	8	9	8	6	10
26	ENSG00000071054	mitogen-activated protein kinase kinase kinase kinase 4	MAP4K4	50	35	-0.5	ENSG00000071054	0.888	0.061	0.902	0.929	0.258	0.895	0.319	-0.061	0.176	0.393	-1.315	-0.407	-0.488	-0.902	-0.644	-0.834	-1.39	-0.705	ENSG00000071054	MAP4K4	50	35	-0.5	0.3	53	41	53	53	44	53	44	39	42	46	20	34	33	26	30	27	19	29
26	ENSG00000109320	nuclear factor of kappa light polypeptide gene enhancer in B-cells 1	NFKB1	45	32	-0.5	ENSG00000109320	2.468	-0.099	1.152	2.358	2.325	0.45	-0.033	0.165	-0.121	2.204	-1.568	-0.175	-0.197	-0.702	-1.217	0.033	-1.349	0.647	ENSG00000109320	NFKB1	45	32	-0.5	0.3	54	30	42	53	52	35	31	33	30	51	17	30	29	25	20	32	19	37
26	ENSG00000123358	nuclear receptor subfamily 4, group A, member 1	NR4A1	20	9	-1.1	ENSG00000123358	4.721	-0.6	1.504	0.501	1.429	0.291	-0.514	-0.006	0.006	-0.773	-0.613	0.674	1.615	-0.167	2.172	-0.674	-0.687	-0.786	ENSG00000123358	NR4A1	20	9	-1.1	1	45	2	19	11	19	10	3	7	7	1	2	13	20	6	25	2	2	1
26	ENSG00000184381	phospholipase A2, group VI (cytosolic, calcium-independent)	PLA2G6	18	13	-0.5	ENSG00000184381	0.953	1.012	1.642	1.672	-0.631	0.718	-0.308	2.038	3.153	3.93	-0.631	0.293	-0.293	-0.323	-0.587	-0.543	-0.894	-0.323	ENSG00000184381	PLA2G6	18	13	-0.5	0.7	16	16	20	21	5	14	7	23	31	36	5	11	7	7	5	5	3	7
26	ENSG00000101109	serine/threonine kinase 4	STK4	81	55	-0.5	ENSG00000101109	1.076	-0.227	1.352	1.708	0.278	0.227	0.577	0.296	0.588	0.491	-1.633	-1.036	-0.72	-0.554	-1.105	-0.669	-1.846	-0.68	ENSG00000101109	STK4	81	55	-0.5	0.3	82	60	87	93	68	67	74	69	74	72	35	45	51	54	44	52	31	52
26	ENSG00000163513	transforming growth factor, beta receptor II (70/80kDa)	TGFBR2	98	62	-0.7	ENSG00000163513	1.923	0.473	2.266	3.006	2.958	-0.035	0.497	0.225	-1.201	-0.509	-0.497	-0.006	-0.882	-0.923	-0.84	0.444	-2.018	0.006	ENSG00000163513	TGFBR2	98	62	-0.7	0.3	98	74	104	117	116	65	74	70	45	57	57	66	51	50	52	73	32	66
26	ENSG00000173039	v-rel reticuloendotheliosis viral oncogene homolog A (avian)	RELA	87	52	-0.8	ENSG00000173039	3.412	-0.295	2.606	3.412	2.351	0.707	-0.38	-0.052	0.367	0.052	-0.72	-0.642	-0.773	0.079	-0.131	-0.805	-1.074	0.301	ENSG00000173039	RELA	87	52	-0.8	0.4	105	48	92	105	88	63	47	52	58	53	41	43	41	54	50	40	36	57
27	Neutrophin	GENE NAME	Symbol	avgCON	avgAFF	log(a/c)	ENSG	N048	N068	N090	N098	L005	L137	L101	L062	L149	L140	L031	L072	L133	L074	L078	L102	L115	L027	pureENSG	gene	avgCON	avgAFF	log(a/c)	CV	N048	N068	N090	N098	L005	L137	L101	L062	L149	L140	L031	L072	L133	L074	L078	L102	L115	L027
27	ENSG00000145349	calcium/calmodulin-dependent protein kinase II delta	CAMK2D	19	11	-0.8	ENSG00000145349	4.475	-0.592	4.442	2.731	5.001	0.428	1.119	0.329	-0.79	-0.691	-0.526	-0.757	-0.263	0.263	-0.658	-0.296	-0.757	0.296	ENSG00000145349	CAMK2D	19	11	-0.8	0.4	25	9	25	19	26	12	14	12	9	9	9	9	10	12	9	10	9	12
27	ENSG00000152495	calcium/calmodulin-dependent protein kinase IV	CAMK4	55	38	-0.5	ENSG00000152495	0.467	0.012	0.775	1.308	0.728	0.598	0.219	-0.012	-0.929	0.379	-0.876	-0.669	-0.68	-0.243	-1.118	-0.893	-0.882	0.189	ENSG00000152495	CAMK4	55	38	-0.5	0.3	52	44	57	66	56	54	48	44	28	51	29	33	33	40	25	29	29	47
27	ENSG00000185950	insulin receptor substrate 2	IRS2	27	11	-1.3	ENSG00000185950	6.463	-0.644	4.168	5.154	2.517	5.98	1.631	-0.161	0.161	-0.242	-0.564	0.503	0.705	-0.242	-0.463	-0.221	-1.248	-0.825	ENSG00000185950	IRS2	27	11	-1.3	0.8	41	5	29	34	21	38	17	8	9	7	6	11	12	7	6	7	2	4
27	ENSG00000177606	jun oncogene	JUN	80	43	-0.9	ENSG00000177606	5.244	-1.351	0.388	2.744	-0.344	2.575	0.359	0.344	-1.139	-0.764	-0.108	1.896	-0.07	0.585	-1.269	-0.301	0.07	-1.077	ENSG00000177606	JUN	80	43	-0.9	0.7	152	16	52	101	36	97	51	51	20	28	41	83	42	56	17	37	45	21
27	ENSG00000076984	mitogen-activated protein kinase kinase 7	MAP2K7	20	12	-0.7	ENSG00000076984	1.453	0.394	2.656	1.743	0.291	0.104	-0.747	0.623	1.183	1.847	-1.162	-0.54	-0.104	-0.353	-0.706	-0.892	-0.643	-0.311	ENSG00000076984	MAP2K7	20	12	-0.7	0.4	20	14	25	21	14	13	9	16	18	21	7	10	12	11	9	8	9	11
27	ENSG00000095015	mitogen-activated protein kinase kinase kinase 1	MAP3K1	27	24	-0.2	ENSG00000095015	1.129	0.157	0.751	-0.364	0.436	0.787	0.796	1.506	2.172	-0.373	-1.192	0.823	-0.598	-0.211	-0.193	-0.58	-1.138	-0.157	ENSG00000095015	MAP3K1	27	24	-0.2	0.4	35	24	31	18	27	31	31	39	46	18	9	31	16	20	20	16	10	21
27	ENSG00000109320	nuclear factor of kappa light polypeptide gene enhancer in B-cells 1	NFKB1	45	32	-0.5	ENSG00000109320	2.468	-0.099	1.152	2.358	2.325	0.45	-0.033	0.165	-0.121	2.204	-1.568	-0.175	-0.197	-0.702	-1.217	0.033	-1.349	0.647	ENSG00000109320	NFKB1	45	32	-0.5	0.3	54	30	42	53	52	35	31	33	30	51	17	30	29	25	20	32	19	37
27	ENSG00000121879	phosphoinositide-3-kinase, catalytic, alpha polypeptide	PIK3CA	24	13	-0.9	ENSG00000121879	5.449	-0.635	5.052	3.015	6.031	1.032	0.529	0.899	0.476	-0.344	-1.058	-0.317	-0.661	0.079	-0.688	-0.503	-1.111	-0.079	ENSG00000121879	PIK3CA	24	13	-0.9	0.5	33	10	31	23	35	16	14	15	14	11	8	11	10	12	9	10	8	12
27	ENSG00000171608	phosphoinositide-3-kinase, catalytic, delta polypeptide	PIK3CD	100	62	-0.7	ENSG00000171608	0.381	0.852	1.697	1.666	0.129	0.169	-0.245	0.937	0.734	1.697	-1.059	-0.129	-0.433	-0.229	-0.746	-0.615	-0.752	-0.208	ENSG00000171608	PIK3CD	100	62	-0.7	0.4	75	90	118	117	67	68	54	93	86	118	27	58	48	55	38	42	38	55
27	ENSG00000145675	phosphoinositide-3-kinase, regulatory subunit 1 (alpha)	PIK3R1	222	86	-1.4	ENSG00000145675	4.304	-0.54	4.506	5.677	4.974	1.538	0.975	0.015	0.844	-0.051	0.899	-0.015	-0.316	-0.591	-0.409	-0.336	-0.758	-0.536	ENSG00000145675	PIK3R1	222	86	-1.4	0.8	260	39	269	322	290	134	108	64	102	61	105	63	49	37	45	48	29	39
27	ENSG00000141506	phosphoinositide-3-kinase, regulatory subunit 5	PIK3R5	59	47	-0.3	ENSG00000141506	0.703	-0.017	0.774	1.025	-0.338	0.338	0.054	0.656	1.285	2.909	-0.532	-0.012	0.012	-0.627	-0.84	-0.693	-1.247	-0.831	ENSG00000141506	PIK3R5	59	47	-0.3	0.4	60	45	62	67	38	53	47	59	73	107	34	45	46	32	28	31	19	28
27	ENSG00000124181	phospholipase C, gamma 1	PLCG1	77	69	-0.2	ENSG00000124181	0.024	1.457	0.985	0.687	-0.684	0.027	-0.516	1.852	2.987	5.588	-1.076	0.137	-0.432	-0.422	-0.888	-0.341	-0.665	-0.024	ENSG00000124181	PLCG1	77	69	-0.2	0.7	53	97	83	74	31	53	36	110	145	225	19	57	39	39	25	42	32	52
27	ENSG00000170027	tyrosine 3-monooxygenase/tryptophan 5-monooxygenase activation protein, gamma polypeptide	YWHAG	17	10	-0.8	ENSG00000170027	4.251	-0.925	3.529	3.059	4.847	-0.016	-0.078	-1.051	0.612	-0.674	0.173	-0.078	0.737	-0.204	0.643	0.016	-0.674	-1.051	ENSG00000170027	YWHAG	17	10	-0.8	0.5	23	6	20	19	25	9	9	6	11	7	10	9	12	9	11	9	7	6
27	ENSG00000173039	v-rel reticuloendotheliosis viral oncogene homolog A (avian)	RELA	87	52	-0.8	ENSG00000173039	3.412	-0.295	2.606	3.412	2.351	0.707	-0.38	-0.052	0.367	0.052	-0.72	-0.642	-0.773	0.079	-0.131	-0.805	-1.074	0.301	ENSG00000173039	RELA	87	52	-0.8	0.4	105	48	92	105	88	63	47	52	58	53	41	43	41	54	50	40	36	57
27	ENSG00000171606	zinc finger protein 274	ZNF274	25	13	-0.9	ENSG00000171606	1.012	0.803	2.955	2.232	0.787	0.61	0.08	0.723	-0.177	0.674	-0.899	-0.128	-0.674	-0.674	-0.626	-0.353	-1.172	-0.08	ENSG00000171606	ZNF274	25	13	-0.9	0.4	20	19	32	28	19	18	14	18	13	18	8	13	10	10	10	12	7	13
28	T cell receptor	GENE NAME	Symbol	avgCON	avgAFF	log(a/c)	ENSG	N048	N068	N090	N098	L005	L137	L101	L062	L149	L140	L031	L072	L133	L074	L078	L102	L115	L027	pureENSG	gene	avgCON	avgAFF	log(a/c)	CV	N048	N068	N090	N098	L005	L137	L101	L062	L149	L140	L031	L072	L133	L074	L078	L102	L115	L027
28	ENSG00000178562	CD28 molecule	CD28	80	42	-0.9	ENSG00000178562	2.617	-0.267	2.314	3.692	3.89	0.18	0.64	-0.116	0.454	-0.709	-0.849	-0.808	0.116	0.419	-0.285	-1.134	-1.239	-0.39	ENSG00000178562	CD28	80	42	-0.9	0.5	89	39	84	107	111	47	55	42	52	32	29	30	46	51	39	24	22	37
28	ENSG00000163600	inducible T-cell co-stimulator	ICOS	38	22	-0.8	ENSG00000163600	2.398	-0.448	1.016	2.332	1.189	0.736	-0.144	0.029	0.596	-0.613	-0.753	0.062	1.254	-0.029	-0.045	-0.851	-1.065	-0.539	ENSG00000163600	ICOS	38	22	-0.8	0.5	51	17	35	51	37	31	21	23	30	15	13	23	38	22	22	12	9	16
28	ENSG00000177606	jun oncogene	JUN	80	43	-0.9	ENSG00000177606	5.244	-1.351	0.388	2.744	-0.344	2.575	0.359	0.344	-1.139	-0.764	-0.108	1.896	-0.07	0.585	-1.269	-0.301	0.07	-1.077	ENSG00000177606	JUN	80	43	-0.9	0.7	152	16	52	101	36	97	51	51	20	28	41	83	42	56	17	37	45	21
28	ENSG00000076984	mitogen-activated protein kinase kinase 7	MAP2K7	20	12	-0.7	ENSG00000076984	1.453	0.394	2.656	1.743	0.291	0.104	-0.747	0.623	1.183	1.847	-1.162	-0.54	-0.104	-0.353	-0.706	-0.892	-0.643	-0.311	ENSG00000076984	MAP2K7	20	12	-0.7	0.4	20	14	25	21	14	13	9	16	18	21	7	10	12	11	9	8	9	11
28	ENSG00000006062	mitogen-activated protein kinase kinase kinase 14	MAP3K14	17	13	-0.5	ENSG00000006062	0.488	0.26	0.878	0.309	-0.26	0.26	-0.65	0.845	0.699	0.601	-1.593	0.455	-0.569	-1.04	-0.796	-1.056	-1.316	-0.699	ENSG00000006062	MAP3K14	17	13	-0.5	0.4	17	16	20	16	13	16	10	20	19	18	5	17	11	8	9	8	6	10
28	ENSG00000109320	nuclear factor of kappa light polypeptide gene enhancer in B-cells 1	NFKB1	45	32	-0.5	ENSG00000109320	2.468	-0.099	1.152	2.358	2.325	0.45	-0.033	0.165	-0.121	2.204	-1.568	-0.175	-0.197	-0.702	-1.217	0.033	-1.349	0.647	ENSG00000109320	NFKB1	45	32	-0.5	0.3	54	30	42	53	52	35	31	33	30	51	17	30	29	25	20	32	19	37
28	ENSG00000121879	phosphoinositide-3-kinase, catalytic, alpha polypeptide	PIK3CA	24	13	-0.9	ENSG00000121879	5.449	-0.635	5.052	3.015	6.031	1.032	0.529	0.899	0.476	-0.344	-1.058	-0.317	-0.661	0.079	-0.688	-0.503	-1.111	-0.079	ENSG00000121879	PIK3CA	24	13	-0.9	0.5	33	10	31	23	35	16	14	15	14	11	8	11	10	12	9	10	8	12
28	ENSG00000171608	phosphoinositide-3-kinase, catalytic, delta polypeptide	PIK3CD	100	62	-0.7	ENSG00000171608	0.381	0.852	1.697	1.666	0.129	0.169	-0.245	0.937	0.734	1.697	-1.059	-0.129	-0.433	-0.229	-0.746	-0.615	-0.752	-0.208	ENSG00000171608	PIK3CD	100	62	-0.7	0.4	75	90	118	117	67	68	54	93	86	118	27	58	48	55	38	42	38	55
28	ENSG00000145675	phosphoinositide-3-kinase, regulatory subunit 1 (alpha)	PIK3R1	222	86	-1.4	ENSG00000145675	4.304	-0.54	4.506	5.677	4.974	1.538	0.975	0.015	0.844	-0.051	0.899	-0.015	-0.316	-0.591	-0.409	-0.336	-0.758	-0.536	ENSG00000145675	PIK3R1	222	86	-1.4	0.8	260	39	269	322	290	134	108	64	102	61	105	63	49	37	45	48	29	39
28	ENSG00000141506	phosphoinositide-3-kinase, regulatory subunit 5	PIK3R5	59	47	-0.3	ENSG00000141506	0.703	-0.017	0.774	1.025	-0.338	0.338	0.054	0.656	1.285	2.909	-0.532	-0.012	0.012	-0.627	-0.84	-0.693	-1.247	-0.831	ENSG00000141506	PIK3R5	59	47	-0.3	0.4	60	45	62	67	38	53	47	59	73	107	34	45	46	32	28	31	19	28
28	ENSG00000124181	phospholipase C, gamma 1	PLCG1	77	69	-0.2	ENSG00000124181	0.024	1.457	0.985	0.687	-0.684	0.027	-0.516	1.852	2.987	5.588	-1.076	0.137	-0.432	-0.422	-0.888	-0.341	-0.665	-0.024	ENSG00000124181	PLCG1	77	69	-0.2	0.7	53	97	83	74	31	53	36	110	145	225	19	57	39	39	25	42	32	52
28	ENSG00000065675	protein kinase C, theta	PRKCQ	37	27	-0.5	ENSG00000065675	0.776	-0.194	0.679	1.552	0.67	1.296	0.749	0.053	0.176	0.247	-0.45	-0.053	-0.141	-0.564	-0.82	-0.829	-1.49	-0.838	ENSG00000065675	PRKCQ	37	27	-0.5	0.3	38	27	37	47	37	44	38	30	31	32	24	29	28	23	20	20	13	20
28	ENSG00000173039	v-rel reticuloendotheliosis viral oncogene homolog A (avian)	RELA	87	52	-0.8	ENSG00000173039	3.412	-0.295	2.606	3.412	2.351	0.707	-0.38	-0.052	0.367	0.052	-0.72	-0.642	-0.773	0.079	-0.131	-0.805	-1.074	0.301	ENSG00000173039	RELA	87	52	-0.8	0.4	105	48	92	105	88	63	47	52	58	53	41	43	41	54	50	40	36	57
29	Spliceosome	GENE NAME	Symbol	avgCON	avgAFF	log(a/c)	ENSG	N048	N068	N090	N098	L005	L137	L101	L062	L149	L140	L031	L072	L133	L074	L078	L102	L115	L027	pureENSG	gene	avgCON	avgAFF	log(a/c)	CV	N048	N068	N090	N098	L005	L137	L101	L062	L149	L140	L031	L072	L133	L074	L078	L102	L115	L027
29	ENSG00000140829	DEAH (Asp-Glu-Ala-His) box polypeptide 38	DHX38	24	17	-0.5	ENSG00000140829	0.695	1.109	2.23	2.07	-0.548	0.013	-0.668	1.589	2.791	4.087	-0.775	0	-0.067	-0.134	-0.147	-0.307	-0.681	0	ENSG00000140829	DHX38	24	17	-0.5	0.6	18	21	30	29	9	13	8	25	34	44	7	13	13	12	12	11	8	13
29	ENSG00000067596	DEAH (Asp-Glu-Ala-His) box polypeptide 8	DHX8	25	15	-0.8	ENSG00000067596	3.428	0.022	3.096	3.074	3.184	1.061	0.332	0.155	0.509	-0.044	-0.752	-0.022	-0.442	-0.84	-0.442	-0.597	-1.835	-0.774	ENSG00000067596	DHX8	25	15	-0.8	0.4	30	15	29	28	29	19	16	15	17	14	11	14	13	11	13	12	6	11
29	ENSG00000134186	PRP38 pre-mRNA processing factor 38 (yeast) domain containing B	PRPF38B	33	22	-0.6	ENSG00000134186	0.413	0.936	1.7	1.622	-0.398	0.717	-0.351	1.513	2.152	2.753	-0.959	0.281	-0.289	-0.476	-0.632	-0.444	-0.764	-0.281	ENSG00000134186	PRPF38B	33	22	-0.6	0.6	23	30	40	39	13	27	14	37	46	53	6	22	14	12	10	12	8	14
29	ENSG00000119707	RNA binding motif protein 25	RBM25	25	21	-0.3	ENSG00000119707	0.319	1.18	1.63	1.393	-0.019	0.368	-0.856	2.379	3.291	4.415	-1.33	0.019	-0.194	-0.418	-0.493	-0.381	-1.093	-0.056	ENSG00000119707	RBM25	25	21	-0.3	0.6	19	26	29	27	16	19	9	35	43	52	6	16	15	13	12	13	8	16
29	ENSG00000076924	XPA binding protein 2	XAB2	41	23	-0.8	ENSG00000076924	1.52	0.728	2.27	2.816	-0.161	0.086	-0.792	0.482	0.856	1.809	-0.921	-0.375	-0.236	-0.086	-0.557	-0.953	-0.621	0.161	ENSG00000076924	XAB2	41	23	-0.8	0.4	38	30	45	50	22	24	16	28	32	40	15	20	21	23	18	15	18	25
29	ENSG00000100813	apoptotic chromatin condensation inducer 1	ACIN1	62	42	-0.6	ENSG00000100813	0.236	1.19	1.039	0.753	-0.735	0.354	-0.541	1.267	1.629	1.974	-1.039	0.108	-0.108	-0.588	-0.614	-0.5	-1.039	-0.464	ENSG00000100813	ACIN1	62	42	-0.6	0.6	46	72	68	60	20	49	25	74	84	94	11	43	37	24	23	26	11	27
29	ENSG00000116752	breast carcinoma amplified sequence 2	BCAS2	61	39	-0.6	ENSG00000116752	2.554	-1.094	1.469	2.226	2.572	2.748	0.636	-0.683	-0.666	-1.258	0.103	0.138	-0.067	0.067	-0.548	-0.654	-0.977	-0.636	ENSG00000116752	BCAS2	61	39	-0.6	0.5	83	21	64	77	83	86	50	28	28	18	41	42	38	40	30	28	23	28
29	ENSG00000101343	crooked neck pre-mRNA splicing factor-like 1 (Drosophila)	CRNKL1	18	9	-1	ENSG00000101343	3.602	-0.301	3.43	3.688	2.856	1.191	0.531	0.043	0.502	-0.387	-0.588	-0.043	0.1	-0.588	-0.875	-0.761	-1.019	-0.761	ENSG00000101343	CRNKL1	18	9	-1	0.5	22	8	21	22	19	13	11	9	11	8	7	9	9	7	6	6	6	6
29	ENSG00000161547	splicing factor, arginine/serine-rich 2	SRSF2	123	86	-0.5	ENSG00000161547	1.276	0.018	1.513	2.809	-0.041	0.863	-0.363	0.714	1.996	2.522	-0.647	0.884	-0.018	-0.369	-0.629	-0.41	-0.702	-0.638	ENSG00000161547	SRSF2	123	86	-0.5	0.4	118	75	126	171	73	104	62	99	143	161	53	105	74	62	53	61	51	53
29	ENSG00000124193	splicing factor, arginine/serine-rich 6; similar to arginine/serine-rich splicing factor 6	SRSF6	93	54	-0.8	ENSG00000124193	1.208	0.338	1.755	2.229	0.317	0.662	-0.893	0.536	0.683	1.099	-1.792	-0.481	-0.666	-0.54	-1.196	-0.574	-1.204	-0.317	ENSG00000124193	SRSF6	93	54	-0.8	0.4	88	68	101	113	67	75	38	72	76	86	17	48	44	47	31	46	31	52
29	ENSG00000115875	splicing factor, arginine/serine-rich 7, 35kDa	SRSF7	166	107	-0.6	ENSG00000115875	0.889	-0.338	1.39	2.68	-0.635	1.464	-0.403	0.5	0.714	0.363	-0.169	0.245	0.169	-0.466	-0.803	-0.82	-1.11	-0.942	ENSG00000115875	SRSF7	166	107	-0.6	0.4	153	95	177	238	81	180	92	134	145	128	103	122	119	89	73	72	58	66
29	ENSG00000119953	survival motor neuron domain containing 1	SMNDC1	24	15	-0.7	ENSG00000119953	3.268	-0.6	3.567	5.516	2.488	1.529	-0.12	0.51	1.049	-0.54	-0.66	-0.18	0.12	0.15	-0.48	-1.079	-0.749	-0.689	ENSG00000119953	SMNDC1	24	15	-0.7	0.4	25	13	26	33	23	20	14	16	18	13	12	14	15	15	13	11	12	12
29	ENSG00000113649	transcription elongation regulator 1	TCERG1	22	17	-0.4	ENSG00000113649	0.023	-0.023	1.166	0.915	0.274	0.229	-0.629	0.812	1.143	0.937	-1.006	0.16	-0.64	-0.617	-0.983	-0.709	-1.143	-0.434	ENSG00000113649	TCERG1	22	17	-0.4	0.4	18	18	28	26	20	20	12	25	28	26	9	19	12	12	9	12	8	14
30	Cell Cycle	GENE NAME	Symbol	avgCON	avgAFF	log(a/c)	ENSG	N048	N068	N090	N098	L005	L137	L101	L062	L149	L140	L031	L072	L133	L074	L078	L102	L115	L027	pureENSG	gene	avgCON	avgAFF	log(a/c)	CV	N048	N068	N090	N098	L005	L137	L101	L062	L149	L140	L031	L072	L133	L074	L078	L102	L115	L027
30	ENSG00000005339	CREB binding protein	CREBBP	46	27	-0.8	ENSG00000005339	1.566	-0.116	2.047	1.83	0.333	1.256	0.116	0.628	0.698	0.512	-1.124	-0.388	-0.349	-0.76	-0.651	-0.923	-1.589	-0.566	ENSG00000005339	CREBBP	46	27	-0.8	0.4	49	28	56	53	33	45	31	37	38	36	15	24	25	19	21	17	9	22
30	ENSG00000006634	DBF4 homolog (S. cerevisiae)	DBF4	28	15	-0.9	ENSG00000006634	3.714	-0.683	2.765	3.914	3.447	1.932	0.583	-0.2	0.117	-0.883	0.233	-0.25	0.949	-0.117	-0.566	-0.55	-1.049	-0.666	ENSG00000006634	DBF4	28	15	-0.9	0.6	36	9	30	37	34	25	17	12	14	8	15	12	19	13	10	10	7	9
30	ENSG00000141646	SMAD family member 4	SMAD4	34	21	-0.7	ENSG00000141646	0.462	0.082	2.127	2.17	1.202	-0.06	-0.451	0.767	0.234	0.528	-1.191	-0.702	-0.821	-0.647	-0.919	-0.506	-0.985	0.06	ENSG00000141646	SMAD4	34	21	-0.7	0.4	27	24	42	43	34	22	19	30	25	28	12	16	15	17	14	18	14	23
30	ENSG00000134480	cyclin H	CCNH	30	19	-0.7	ENSG00000134480	4.397	-0.713	3.074	5.824	4.138	1.051	0.195	-0.065	-0.558	0.947	0.065	-0.195	0.636	-0.324	-1.258	-0.61	-0.791	-0.454	ENSG00000134480	CCNH	30	19	-0.7	0.4	35	15	29	40	34	22	18	17	15	21	18	17	20	16	13	15	15	16
30	ENSG00000124762	cyclin-dependent kinase inhibitor 1A (p21, Cip1)	CDKN1A	21	9	-1.2	ENSG00000124762	3.8	-0.784	0.674	2.265	1.278	0.674	-0.236	-0.126	0.104	-0.74	-0.104	-0.148	1.025	0.269	2.056	-0.631	-0.587	-0.729	ENSG00000124762	CDKN1A	21	9	-1.2	0.9	42	1	14	28	19	14	6	7	9	1	7	6	17	10	26	2	2	1
30	ENSG00000111276	cyclin-dependent kinase inhibitor 1B (p27, Kip1)	CDKN1B	200	117	-0.8	ENSG00000111276	2.248	-0.21	2.441	2.528	1.29	0.33	1.012	-0.039	0.039	-0.263	0.101	0.786	-0.681	-0.668	-0.423	-0.299	-1.083	-0.754	ENSG00000111276	CDKN1B	200	117	-0.8	0.4	222	112	231	235	179	136	167	119	123	109	126	156	90	91	102	108	72	87
30	ENSG00000105325	fizzy/cell division cycle 20 related 1 (Drosophila)	FZR1	31	17	-0.9	ENSG00000105325	2.705	0.131	1.604	2.994	0.489	0.915	-0.158	0.076	0.86	0.943	-0.957	-0.241	-0.076	-0.447	-0.475	-0.599	-1.122	-0.75	ENSG00000105325	FZR1	31	17	-0.9	0.4	37	18	29	39	21	24	16	18	24	24	10	16	17	14	14	13	9	12
30	ENSG00000116717	growth arrest and DNA-damage-inducible, alpha	GADD45A	57	17	-1.7	ENSG00000116717	7.53	-0.768	2.57	5.311	2.852	1.964	-0.06	-0.64	-0.009	0.615	-0.12	-0.12	0.35	0.009	-0.546	0.717	-0.709	-0.914	ENSG00000116717	GADD45A	57	17	-1.7	1	102	5	44	76	47	37	13	6	14	21	13	13	18	14	8	22	6	3
30	ENSG00000099860	growth arrest and DNA-damage-inducible, beta	GADD45B	108	58	-0.9	ENSG00000099860	4.756	-0.407	1.8	4.131	0.873	2.678	0.977	-0.198	-0.298	-0.367	0.431	0.818	0.015	-0.015	-0.169	-1.408	-0.531	-1.037	ENSG00000099860	GADD45B	108	58	-0.9	0.5	153	48	93	140	74	111	76	53	51	49	65	73	57	56	53	28	46	36
30	ENSG00000170027	tyrosine 3-monooxygenase/tryptophan 5-monooxygenase activation protein, gamma polypeptide	YWHAG	17	10	-0.8	ENSG00000170027	4.251	-0.925	3.529	3.059	4.847	-0.016	-0.078	-1.051	0.612	-0.674	0.173	-0.078	0.737	-0.204	0.643	0.016	-0.674	-1.051	ENSG00000170027	YWHAG	17	10	-0.8	0.5	23	6	20	19	25	9	9	6	11	7	10	9	12	9	11	9	7	6
30	ENSG00000116809	zinc finger and BTB domain containing 17	ZBTB17	19	12	-0.7	ENSG00000116809	0.809	0.613	1.374	1.656	-0.65	0.159	-0.724	1.067	1.974	2.955	-0.92	0.061	-0.061	-0.613	-0.613	-0.687	-0.662	-0.368	ENSG00000116809	ZBTB17	19	12	-0.7	0.7	17	15	22	24	5	12	4	19	26	34	3	11	10	5	5	5	5	7
31	Chemokine Signalling	GENE NAME	Symbol	avgCON	avgAFF	log(a/c)	ENSG	N048	N068	N090	N098	L005	L137	L101	L062	L149	L140	L031	L072	L133	L074	L078	L102	L115	L027	pureENSG	gene	avgCON	avgAFF	log(a/c)	CV	N048	N068	N090	N098	L005	L137	L101	L062	L149	L140	L031	L072	L133	L074	L078	L102	L115	L027
31	ENSG00000156299	T-cell lymphoma invasion and metastasis 1	TIAM1	16	11	-0.5	ENSG00000156299	0.627	0.063	2.98	1.569	2.259	0.69	-0.188	0.22	2.071	-0.659	-2.227	-0.063	-1.349	-0.533	0.408	-1.506	-2.478	-0.408	ENSG00000156299	TIAM1	16	11	-0.5	0.4	14	12	22	17	19	14	11	13	19	10	5	12	8	10	13	7	4	11
31	ENSG00000183813	chemokine (C-C motif) receptor 4	CCR4	33	10	-1.7	ENSG00000183813	4.674	0.074	4.121	4.243	3.946	1.153	0.681	-0.223	1.383	-0.722	-0.668	-0.236	-0.438	-0.263	0.263	-0.56	-0.776	-0.074	ENSG00000183813	CCR4	33	10	-1.7	0.9	43	9	39	40	38	17	13	7	19	3	3	7	5	6	10	4	3	8
31	ENSG00000126353	chemokine (C-C motif) receptor 7	CCR7	309	159	-1	ENSG00000126353	2.758	1.747	2.435	1.604	2.352	-0.271	-0.041	0.041	-0.216	2.059	-0.989	-0.337	-0.323	-0.609	-1.074	0.74	-0.526	0.576	ENSG00000126353	CCR7	309	159	-1	0.5	356	279	332	268	325	125	143	149	129	303	70	120	121	99	64	202	106	190
31	ENSG00000221978	cyclin L2; chemokine (C-C motif) receptor 6	CCNL2	42	29	-0.5	ENSG00000221978	1.257	1.6	2.782	2.899	-0.411	0.687	-0.369	2.757	5.982	6.686	-0.855	0.36	-0.36	-0.452	-0.628	-0.377	-0.662	-0.369	ENSG00000221978	CCNL2	42	29	-0.5	0.9	31	35	49	51	11	24	12	49	88	96	6	20	12	11	9	12	8	12
31	ENSG00000155849	engulfment and cell motility 1	ELMO1	44	29	-0.6	ENSG00000155849	1.996	-0.234	2.508	1.996	1.768	1.757	1.365	-0.604	0.092	-0.669	-0.43	-0.016	0.103	0.016	-0.734	-0.245	-1.474	-0.68	ENSG00000155849	ELMO1	44	29	-0.6	0.3	48	27	52	48	46	46	42	24	30	23	25	29	30	30	23	27	16	23
31	ENSG00000109320	nuclear factor of kappa light polypeptide gene enhancer in B-cells 1	NFKB1	45	32	-0.5	ENSG00000109320	2.468	-0.099	1.152	2.358	2.325	0.45	-0.033	0.165	-0.121	2.204	-1.568	-0.175	-0.197	-0.702	-1.217	0.033	-1.349	0.647	ENSG00000109320	NFKB1	45	32	-0.5	0.3	54	30	42	53	52	35	31	33	30	51	17	30	29	25	20	32	19	37
31	ENSG00000121879	phosphoinositide-3-kinase, catalytic, alpha polypeptide	PIK3CA	24	13	-0.9	ENSG00000121879	5.449	-0.635	5.052	3.015	6.031	1.032	0.529	0.899	0.476	-0.344	-1.058	-0.317	-0.661	0.079	-0.688	-0.503	-1.111	-0.079	ENSG00000121879	PIK3CA	24	13	-0.9	0.5	33	10	31	23	35	16	14	15	14	11	8	11	10	12	9	10	8	12
31	ENSG00000171608	phosphoinositide-3-kinase, catalytic, delta polypeptide	PIK3CD	100	62	-0.7	ENSG00000171608	0.381	0.852	1.697	1.666	0.129	0.169	-0.245	0.937	0.734	1.697	-1.059	-0.129	-0.433	-0.229	-0.746	-0.615	-0.752	-0.208	ENSG00000171608	PIK3CD	100	62	-0.7	0.4	75	90	118	117	67	68	54	93	86	118	27	58	48	55	38	42	38	55
31	ENSG00000145675	phosphoinositide-3-kinase, regulatory subunit 1 (alpha)	PIK3R1	222	86	-1.4	ENSG00000145675	4.304	-0.54	4.506	5.677	4.974	1.538	0.975	0.015	0.844	-0.051	0.899	-0.015	-0.316	-0.591	-0.409	-0.336	-0.758	-0.536	ENSG00000145675	PIK3R1	222	86	-1.4	0.8	260	39	269	322	290	134	108	64	102	61	105	63	49	37	45	48	29	39
31	ENSG00000141506	phosphoinositide-3-kinase, regulatory subunit 5	PIK3R5	59	47	-0.3	ENSG00000141506	0.703	-0.017	0.774	1.025	-0.338	0.338	0.054	0.656	1.285	2.909	-0.532	-0.012	0.012	-0.627	-0.84	-0.693	-1.247	-0.831	ENSG00000141506	PIK3R5	59	47	-0.3	0.4	60	45	62	67	38	53	47	59	73	107	34	45	46	32	28	31	19	28
31	ENSG00000173039	v-rel reticuloendotheliosis viral oncogene homolog A (avian)	RELA	87	52	-0.8	ENSG00000173039	3.412	-0.295	2.606	3.412	2.351	0.707	-0.38	-0.052	0.367	0.052	-0.72	-0.642	-0.773	0.079	-0.131	-0.805	-1.074	0.301	ENSG00000173039	RELA	87	52	-0.8	0.4	105	48	92	105	88	63	47	52	58	53	41	43	41	54	50	40	36	57
32	CML	GENE NAME	Symbol	avgCON	avgAFF	log(a/c)	ENSG	N048	N068	N090	N098	L005	L137	L101	L062	L149	L140	L031	L072	L133	L074	L078	L102	L115	L027	pureENSG	gene	avgCON	avgAFF	log(a/c)	CV	N048	N068	N090	N098	L005	L137	L101	L062	L149	L140	L031	L072	L133	L074	L078	L102	L115	L027
32	ENSG00000141646	SMAD family member 4	SMAD4	34	21	-0.7	ENSG00000141646	0.462	0.082	2.127	2.17	1.202	-0.06	-0.451	0.767	0.234	0.528	-1.191	-0.702	-0.821	-0.647	-0.919	-0.506	-0.985	0.06	ENSG00000141646	SMAD4	34	21	-0.7	0.4	27	24	42	43	34	22	19	30	25	28	12	16	15	17	14	18	14	23
32	ENSG00000124762	cyclin-dependent kinase inhibitor 1A (p21, Cip1)	CDKN1A	21	9	-1.2	ENSG00000124762	3.8	-0.784	0.674	2.265	1.278	0.674	-0.236	-0.126	0.104	-0.74	-0.104	-0.148	1.025	0.269	2.056	-0.631	-0.587	-0.729	ENSG00000124762	CDKN1A	21	9	-1.2	0.9	42	1	14	28	19	14	6	7	9	1	7	6	17	10	26	2	2	1
32	ENSG00000111276	cyclin-dependent kinase inhibitor 1B (p27, Kip1)	CDKN1B	200	117	-0.8	ENSG00000111276	2.248	-0.21	2.441	2.528	1.29	0.33	1.012	-0.039	0.039	-0.263	0.101	0.786	-0.681	-0.668	-0.423	-0.299	-1.083	-0.754	ENSG00000111276	CDKN1B	200	117	-0.8	0.4	222	112	231	235	179	136	167	119	123	109	126	156	90	91	102	108	72	87
32	ENSG00000109320	nuclear factor of kappa light polypeptide gene enhancer in B-cells 1	NFKB1	45	32	-0.5	ENSG00000109320	2.468	-0.099	1.152	2.358	2.325	0.45	-0.033	0.165	-0.121	2.204	-1.568	-0.175	-0.197	-0.702	-1.217	0.033	-1.349	0.647	ENSG00000109320	NFKB1	45	32	-0.5	0.3	54	30	42	53	52	35	31	33	30	51	17	30	29	25	20	32	19	37
32	ENSG00000121879	phosphoinositide-3-kinase, catalytic, alpha polypeptide	PIK3CA	24	13	-0.9	ENSG00000121879	5.449	-0.635	5.052	3.015	6.031	1.032	0.529	0.899	0.476	-0.344	-1.058	-0.317	-0.661	0.079	-0.688	-0.503	-1.111	-0.079	ENSG00000121879	PIK3CA	24	13	-0.9	0.5	33	10	31	23	35	16	14	15	14	11	8	11	10	12	9	10	8	12
32	ENSG00000171608	phosphoinositide-3-kinase, catalytic, delta polypeptide	PIK3CD	100	62	-0.7	ENSG00000171608	0.381	0.852	1.697	1.666	0.129	0.169	-0.245	0.937	0.734	1.697	-1.059	-0.129	-0.433	-0.229	-0.746	-0.615	-0.752	-0.208	ENSG00000171608	PIK3CD	100	62	-0.7	0.4	75	90	118	117	67	68	54	93	86	118	27	58	48	55	38	42	38	55
32	ENSG00000145675	phosphoinositide-3-kinase, regulatory subunit 1 (alpha)	PIK3R1	222	86	-1.4	ENSG00000145675	4.304	-0.54	4.506	5.677	4.974	1.538	0.975	0.015	0.844	-0.051	0.899	-0.015	-0.316	-0.591	-0.409	-0.336	-0.758	-0.536	ENSG00000145675	PIK3R1	222	86	-1.4	0.8	260	39	269	322	290	134	108	64	102	61	105	63	49	37	45	48	29	39
32	ENSG00000141506	phosphoinositide-3-kinase, regulatory subunit 5	PIK3R5	59	47	-0.3	ENSG00000141506	0.703	-0.017	0.774	1.025	-0.338	0.338	0.054	0.656	1.285	2.909	-0.532	-0.012	0.012	-0.627	-0.84	-0.693	-1.247	-0.831	ENSG00000141506	PIK3R5	59	47	-0.3	0.4	60	45	62	67	38	53	47	59	73	107	34	45	46	32	28	31	19	28
32	ENSG00000163513	transforming growth factor, beta receptor II (70/80kDa)	TGFBR2	98	62	-0.7	ENSG00000163513	1.923	0.473	2.266	3.006	2.958	-0.035	0.497	0.225	-1.201	-0.509	-0.497	-0.006	-0.882	-0.923	-0.84	0.444	-2.018	0.006	ENSG00000163513	TGFBR2	98	62	-0.7	0.3	98	74	104	117	116	65	74	70	45	57	57	66	51	50	52	73	32	66
32	ENSG00000173039	v-rel reticuloendotheliosis viral oncogene homolog A (avian)	RELA	87	52	-0.8	ENSG00000173039	3.412	-0.295	2.606	3.412	2.351	0.707	-0.38	-0.052	0.367	0.052	-0.72	-0.642	-0.773	0.079	-0.131	-0.805	-1.074	0.301	ENSG00000173039	RELA	87	52	-0.8	0.4	105	48	92	105	88	63	47	52	58	53	41	43	41	54	50	40	36	57
33	ErbB Signalling	GENE NAME	Symbol	avgCON	avgAFF	log(a/c)	ENSG	N048	N068	N090	N098	L005	L137	L101	L062	L149	L140	L031	L072	L133	L074	L078	L102	L115	L027	pureENSG	gene	avgCON	avgAFF	log(a/c)	CV	N048	N068	N090	N098	L005	L137	L101	L062	L149	L140	L031	L072	L133	L074	L078	L102	L115	L027
33	ENSG00000145349	calcium/calmodulin-dependent protein kinase II delta	CAMK2D	19	11	-0.8	ENSG00000145349	4.475	-0.592	4.442	2.731	5.001	0.428	1.119	0.329	-0.79	-0.691	-0.526	-0.757	-0.263	0.263	-0.658	-0.296	-0.757	0.296	ENSG00000145349	CAMK2D	19	11	-0.8	0.4	25	9	25	19	26	12	14	12	9	9	9	9	10	12	9	10	9	12
33	ENSG00000124762	cyclin-dependent kinase inhibitor 1A (p21, Cip1)	CDKN1A	21	9	-1.2	ENSG00000124762	3.8	-0.784	0.674	2.265	1.278	0.674	-0.236	-0.126	0.104	-0.74	-0.104	-0.148	1.025	0.269	2.056	-0.631	-0.587	-0.729	ENSG00000124762	CDKN1A	21	9	-1.2	0.9	42	1	14	28	19	14	6	7	9	1	7	6	17	10	26	2	2	1
33	ENSG00000111276	cyclin-dependent kinase inhibitor 1B (p27, Kip1)	CDKN1B	200	117	-0.8	ENSG00000111276	2.248	-0.21	2.441	2.528	1.29	0.33	1.012	-0.039	0.039	-0.263	0.101	0.786	-0.681	-0.668	-0.423	-0.299	-1.083	-0.754	ENSG00000111276	CDKN1B	200	117	-0.8	0.4	222	112	231	235	179	136	167	119	123	109	126	156	90	91	102	108	72	87
33	ENSG00000177606	jun oncogene	JUN	80	43	-0.9	ENSG00000177606	5.244	-1.351	0.388	2.744	-0.344	2.575	0.359	0.344	-1.139	-0.764	-0.108	1.896	-0.07	0.585	-1.269	-0.301	0.07	-1.077	ENSG00000177606	JUN	80	43	-0.9	0.7	152	16	52	101	36	97	51	51	20	28	41	83	42	56	17	37	45	21
33	ENSG00000076984	mitogen-activated protein kinase kinase 7	MAP2K7	20	12	-0.7	ENSG00000076984	1.453	0.394	2.656	1.743	0.291	0.104	-0.747	0.623	1.183	1.847	-1.162	-0.54	-0.104	-0.353	-0.706	-0.892	-0.643	-0.311	ENSG00000076984	MAP2K7	20	12	-0.7	0.4	20	14	25	21	14	13	9	16	18	21	7	10	12	11	9	8	9	11
33	ENSG00000121879	phosphoinositide-3-kinase, catalytic, alpha polypeptide	PIK3CA	24	13	-0.9	ENSG00000121879	5.449	-0.635	5.052	3.015	6.031	1.032	0.529	0.899	0.476	-0.344	-1.058	-0.317	-0.661	0.079	-0.688	-0.503	-1.111	-0.079	ENSG00000121879	PIK3CA	24	13	-0.9	0.5	33	10	31	23	35	16	14	15	14	11	8	11	10	12	9	10	8	12
33	ENSG00000171608	phosphoinositide-3-kinase, catalytic, delta polypeptide	PIK3CD	100	62	-0.7	ENSG00000171608	0.381	0.852	1.697	1.666	0.129	0.169	-0.245	0.937	0.734	1.697	-1.059	-0.129	-0.433	-0.229	-0.746	-0.615	-0.752	-0.208	ENSG00000171608	PIK3CD	100	62	-0.7	0.4	75	90	118	117	67	68	54	93	86	118	27	58	48	55	38	42	38	55
33	ENSG00000145675	phosphoinositide-3-kinase, regulatory subunit 1 (alpha)	PIK3R1	222	86	-1.4	ENSG00000145675	4.304	-0.54	4.506	5.677	4.974	1.538	0.975	0.015	0.844	-0.051	0.899	-0.015	-0.316	-0.591	-0.409	-0.336	-0.758	-0.536	ENSG00000145675	PIK3R1	222	86	-1.4	0.8	260	39	269	322	290	134	108	64	102	61	105	63	49	37	45	48	29	39
33	ENSG00000141506	phosphoinositide-3-kinase, regulatory subunit 5	PIK3R5	59	47	-0.3	ENSG00000141506	0.703	-0.017	0.774	1.025	-0.338	0.338	0.054	0.656	1.285	2.909	-0.532	-0.012	0.012	-0.627	-0.84	-0.693	-1.247	-0.831	ENSG00000141506	PIK3R5	59	47	-0.3	0.4	60	45	62	67	38	53	47	59	73	107	34	45	46	32	28	31	19	28
33	ENSG00000124181	phospholipase C, gamma 1	PLCG1	77	69	-0.2	ENSG00000124181	0.024	1.457	0.985	0.687	-0.684	0.027	-0.516	1.852	2.987	5.588	-1.076	0.137	-0.432	-0.422	-0.888	-0.341	-0.665	-0.024	ENSG00000124181	PLCG1	77	69	-0.2	0.7	53	97	83	74	31	53	36	110	145	225	19	57	39	39	25	42	32	52
34	Apoptosis	GENE NAME	Symbol	avgCON	avgAFF	log(a/c)	ENSG	N048	N068	N090	N098	L005	L137	L101	L062	L149	L140	L031	L072	L133	L074	L078	L102	L115	L027	pureENSG	gene	avgCON	avgAFF	log(a/c)	CV	N048	N068	N090	N098	L005	L137	L101	L062	L149	L140	L031	L072	L133	L074	L078	L102	L115	L027
34	ENSG00000023445	baculoviral IAP repeat-containing 3	BIRC3	84	70	-0.3	ENSG00000023445	1.25	-0.867	1.187	0.6	1.62	-0.061	0.061	0.233	0.864	1.84	-0.568	0.686	-0.663	-0.734	-0.817	-0.39	-0.648	-0.52	ENSG00000023445	BIRC3	84	70	-0.3	0.4	108	36	106	86	120	64	68	74	95	128	47	89	43	41	38	53	44	48
34	ENSG00000006062	mitogen-activated protein kinase kinase kinase 14	MAP3K14	17	13	-0.5	ENSG00000006062	0.488	0.26	0.878	0.309	-0.26	0.26	-0.65	0.845	0.699	0.601	-1.593	0.455	-0.569	-1.04	-0.796	-1.056	-1.316	-0.699	ENSG00000006062	MAP3K14	17	13	-0.5	0.4	17	16	20	16	13	16	10	20	19	18	5	17	11	8	9	8	6	10
34	ENSG00000109320	nuclear factor of kappa light polypeptide gene enhancer in B-cells 1	NFKB1	45	32	-0.5	ENSG00000109320	2.468	-0.099	1.152	2.358	2.325	0.45	-0.033	0.165	-0.121	2.204	-1.568	-0.175	-0.197	-0.702	-1.217	0.033	-1.349	0.647	ENSG00000109320	NFKB1	45	32	-0.5	0.3	54	30	42	53	52	35	31	33	30	51	17	30	29	25	20	32	19	37
34	ENSG00000121879	phosphoinositide-3-kinase, catalytic, alpha polypeptide	PIK3CA	24	13	-0.9	ENSG00000121879	5.449	-0.635	5.052	3.015	6.031	1.032	0.529	0.899	0.476	-0.344	-1.058	-0.317	-0.661	0.079	-0.688	-0.503	-1.111	-0.079	ENSG00000121879	PIK3CA	24	13	-0.9	0.5	33	10	31	23	35	16	14	15	14	11	8	11	10	12	9	10	8	12
34	ENSG00000171608	phosphoinositide-3-kinase, catalytic, delta polypeptide	PIK3CD	100	62	-0.7	ENSG00000171608	0.381	0.852	1.697	1.666	0.129	0.169	-0.245	0.937	0.734	1.697	-1.059	-0.129	-0.433	-0.229	-0.746	-0.615	-0.752	-0.208	ENSG00000171608	PIK3CD	100	62	-0.7	0.4	75	90	118	117	67	68	54	93	86	118	27	58	48	55	38	42	38	55
34	ENSG00000145675	phosphoinositide-3-kinase, regulatory subunit 1 (alpha)	PIK3R1	222	86	-1.4	ENSG00000145675	4.304	-0.54	4.506	5.677	4.974	1.538	0.975	0.015	0.844	-0.051	0.899	-0.015	-0.316	-0.591	-0.409	-0.336	-0.758	-0.536	ENSG00000145675	PIK3R1	222	86	-1.4	0.8	260	39	269	322	290	134	108	64	102	61	105	63	49	37	45	48	29	39
34	ENSG00000141506	phosphoinositide-3-kinase, regulatory subunit 5	PIK3R5	59	47	-0.3	ENSG00000141506	0.703	-0.017	0.774	1.025	-0.338	0.338	0.054	0.656	1.285	2.909	-0.532	-0.012	0.012	-0.627	-0.84	-0.693	-1.247	-0.831	ENSG00000141506	PIK3R5	59	47	-0.3	0.4	60	45	62	67	38	53	47	59	73	107	34	45	46	32	28	31	19	28
34	ENSG00000120889	tumor necrosis factor receptor superfamily, member 10b	TNFRSF10B	19	12	-0.7	ENSG00000120889	1.758	0.077	2.223	3.66	0.63	1.139	-0.387	1.36	2.068	1.957	-0.63	-0.077	-0.652	-0.542	-0.697	-0.498	-1.028	-0.343	ENSG00000120889	TNFRSF10B	19	12	-0.7	0.5	19	11	21	27	13	16	9	17	20	19	8	10	8	8	7	8	6	9
34	ENSG00000173039	v-rel reticuloendotheliosis viral oncogene homolog A (avian)	RELA	87	52	-0.8	ENSG00000173039	3.412	-0.295	2.606	3.412	2.351	0.707	-0.38	-0.052	0.367	0.052	-0.72	-0.642	-0.773	0.079	-0.131	-0.805	-1.074	0.301	ENSG00000173039	RELA	87	52	-0.8	0.4	105	48	92	105	88	63	47	52	58	53	41	43	41	54	50	40	36	57
35	Fc Singaling	GENE NAME	Symbol	avgCON	avgAFF	log(a/c)	ENSG	N048	N068	N090	N098	L005	L137	L101	L062	L149	L140	L031	L072	L133	L074	L078	L102	L115	L027	pureENSG	gene	avgCON	avgAFF	log(a/c)	CV	N048	N068	N090	N098	L005	L137	L101	L062	L149	L140	L031	L072	L133	L074	L078	L102	L115	L027
35	ENSG00000179639	Fc fragment of IgE, high affinity I, receptor for; alpha polypeptide	FCER1A	27	13	-1	ENSG00000179639	1.55	-0.96	2.225	3.19	0.623	0.22	-0.061	0.033	3.068	-0.979	-0.417	0.108	-0.033	-0.333	2.515	-0.698	-0.998	-0.651	ENSG00000179639	FCER1A	27	13	-1	0.9	27	1	35	45	18	13	10	11	44	0	6	12	11	7	38	3	0	4
35	ENSG00000076984	mitogen-activated protein kinase kinase 7	MAP2K7	20	12	-0.7	ENSG00000076984	1.453	0.394	2.656	1.743	0.291	0.104	-0.747	0.623	1.183	1.847	-1.162	-0.54	-0.104	-0.353	-0.706	-0.892	-0.643	-0.311	ENSG00000076984	MAP2K7	20	12	-0.7	0.4	20	14	25	21	14	13	9	16	18	21	7	10	12	11	9	8	9	11
35	ENSG00000121879	phosphoinositide-3-kinase, catalytic, alpha polypeptide	PIK3CA	24	13	-0.9	ENSG00000121879	5.449	-0.635	5.052	3.015	6.031	1.032	0.529	0.899	0.476	-0.344	-1.058	-0.317	-0.661	0.079	-0.688	-0.503	-1.111	-0.079	ENSG00000121879	PIK3CA	24	13	-0.9	0.5	33	10	31	23	35	16	14	15	14	11	8	11	10	12	9	10	8	12
35	ENSG00000171608	phosphoinositide-3-kinase, catalytic, delta polypeptide	PIK3CD	100	62	-0.7	ENSG00000171608	0.381	0.852	1.697	1.666	0.129	0.169	-0.245	0.937	0.734	1.697	-1.059	-0.129	-0.433	-0.229	-0.746	-0.615	-0.752	-0.208	ENSG00000171608	PIK3CD	100	62	-0.7	0.4	75	90	118	117	67	68	54	93	86	118	27	58	48	55	38	42	38	55
35	ENSG00000145675	phosphoinositide-3-kinase, regulatory subunit 1 (alpha)	PIK3R1	222	86	-1.4	ENSG00000145675	4.304	-0.54	4.506	5.677	4.974	1.538	0.975	0.015	0.844	-0.051	0.899	-0.015	-0.316	-0.591	-0.409	-0.336	-0.758	-0.536	ENSG00000145675	PIK3R1	222	86	-1.4	0.8	260	39	269	322	290	134	108	64	102	61	105	63	49	37	45	48	29	39
35	ENSG00000141506	phosphoinositide-3-kinase, regulatory subunit 5	PIK3R5	59	47	-0.3	ENSG00000141506	0.703	-0.017	0.774	1.025	-0.338	0.338	0.054	0.656	1.285	2.909	-0.532	-0.012	0.012	-0.627	-0.84	-0.693	-1.247	-0.831	ENSG00000141506	PIK3R5	59	47	-0.3	0.4	60	45	62	67	38	53	47	59	73	107	34	45	46	32	28	31	19	28
35	ENSG00000184381	phospholipase A2, group VI (cytosolic, calcium-independent)	PLA2G6	18	13	-0.5	ENSG00000184381	0.953	1.012	1.642	1.672	-0.631	0.718	-0.308	2.038	3.153	3.93	-0.631	0.293	-0.293	-0.323	-0.587	-0.543	-0.894	-0.323	ENSG00000184381	PLA2G6	18	13	-0.5	0.7	16	16	20	21	5	14	7	23	31	36	5	11	7	7	5	5	3	7
35	ENSG00000124181	phospholipase C, gamma 1	PLCG1	77	69	-0.2	ENSG00000124181	0.024	1.457	0.985	0.687	-0.684	0.027	-0.516	1.852	2.987	5.588	-1.076	0.137	-0.432	-0.422	-0.888	-0.341	-0.665	-0.024	ENSG00000124181	PLCG1	77	69	-0.2	0.7	53	97	83	74	31	53	36	110	145	225	19	57	39	39	25	42	32	52
36	Toll-like receptor signaling	GENE NAME	Symbol	avgCON	avgAFF	log(a/c)	ENSG	N048	N068	N090	N098	L005	L137	L101	L062	L149	L140	L031	L072	L133	L074	L078	L102	L115	L027	pureENSG	gene	avgCON	avgAFF	log(a/c)	CV	N048	N068	N090	N098	L005	L137	L101	L062	L149	L140	L031	L072	L133	L074	L078	L102	L115	L027
36	ENSG00000177606	jun oncogene	JUN	80	43	-0.9	ENSG00000177606	5.244	-1.351	0.388	2.744	-0.344	2.575	0.359	0.344	-1.139	-0.764	-0.108	1.896	-0.07	0.585	-1.269	-0.301	0.07	-1.077	ENSG00000177606	JUN	80	43	-0.9	0.7	152	16	52	101	36	97	51	51	20	28	41	83	42	56	17	37	45	21
36	ENSG00000076984	mitogen-activated protein kinase kinase 7	MAP2K7	20	12	-0.7	ENSG00000076984	1.453	0.394	2.656	1.743	0.291	0.104	-0.747	0.623	1.183	1.847	-1.162	-0.54	-0.104	-0.353	-0.706	-0.892	-0.643	-0.311	ENSG00000076984	MAP2K7	20	12	-0.7	0.4	20	14	25	21	14	13	9	16	18	21	7	10	12	11	9	8	9	11
36	ENSG00000109320	nuclear factor of kappa light polypeptide gene enhancer in B-cells 1	NFKB1	45	32	-0.5	ENSG00000109320	2.468	-0.099	1.152	2.358	2.325	0.45	-0.033	0.165	-0.121	2.204	-1.568	-0.175	-0.197	-0.702	-1.217	0.033	-1.349	0.647	ENSG00000109320	NFKB1	45	32	-0.5	0.3	54	30	42	53	52	35	31	33	30	51	17	30	29	25	20	32	19	37
36	ENSG00000121879	phosphoinositide-3-kinase, catalytic, alpha polypeptide	PIK3CA	24	13	-0.9	ENSG00000121879	5.449	-0.635	5.052	3.015	6.031	1.032	0.529	0.899	0.476	-0.344	-1.058	-0.317	-0.661	0.079	-0.688	-0.503	-1.111	-0.079	ENSG00000121879	PIK3CA	24	13	-0.9	0.5	33	10	31	23	35	16	14	15	14	11	8	11	10	12	9	10	8	12
36	ENSG00000171608	phosphoinositide-3-kinase, catalytic, delta polypeptide	PIK3CD	100	62	-0.7	ENSG00000171608	0.381	0.852	1.697	1.666	0.129	0.169	-0.245	0.937	0.734	1.697	-1.059	-0.129	-0.433	-0.229	-0.746	-0.615	-0.752	-0.208	ENSG00000171608	PIK3CD	100	62	-0.7	0.4	75	90	118	117	67	68	54	93	86	118	27	58	48	55	38	42	38	55
36	ENSG00000145675	phosphoinositide-3-kinase, regulatory subunit 1 (alpha)	PIK3R1	222	86	-1.4	ENSG00000145675	4.304	-0.54	4.506	5.677	4.974	1.538	0.975	0.015	0.844	-0.051	0.899	-0.015	-0.316	-0.591	-0.409	-0.336	-0.758	-0.536	ENSG00000145675	PIK3R1	222	86	-1.4	0.8	260	39	269	322	290	134	108	64	102	61	105	63	49	37	45	48	29	39
36	ENSG00000141506	phosphoinositide-3-kinase, regulatory subunit 5	PIK3R5	59	47	-0.3	ENSG00000141506	0.703	-0.017	0.774	1.025	-0.338	0.338	0.054	0.656	1.285	2.909	-0.532	-0.012	0.012	-0.627	-0.84	-0.693	-1.247	-0.831	ENSG00000141506	PIK3R5	59	47	-0.3	0.4	60	45	62	67	38	53	47	59	73	107	34	45	46	32	28	31	19	28
36	ENSG00000173039	v-rel reticuloendotheliosis viral oncogene homolog A (avian)	RELA	87	52	-0.8	ENSG00000173039	3.412	-0.295	2.606	3.412	2.351	0.707	-0.38	-0.052	0.367	0.052	-0.72	-0.642	-0.773	0.079	-0.131	-0.805	-1.074	0.301	ENSG00000173039	RELA	87	52	-0.8	0.4	105	48	92	105	88	63	47	52	58	53	41	43	41	54	50	40	36	57
37	AML	GENE NAME	Symbol	avgCON	avgAFF	log(a/c)	ENSG	N048	N068	N090	N098	L005	L137	L101	L062	L149	L140	L031	L072	L133	L074	L078	L102	L115	L027	pureENSG	gene	avgCON	avgAFF	log(a/c)	CV	N048	N068	N090	N098	L005	L137	L101	L062	L149	L140	L031	L072	L133	L074	L078	L102	L115	L027
37	ENSG00000109320	nuclear factor of kappa light polypeptide gene enhancer in B-cells 1	NFKB1	45	32	-0.5	ENSG00000109320	2.468	-0.099	1.152	2.358	2.325	0.45	-0.033	0.165	-0.121	2.204	-1.568	-0.175	-0.197	-0.702	-1.217	0.033	-1.349	0.647	ENSG00000109320	NFKB1	45	32	-0.5	0.3	54	30	42	53	52	35	31	33	30	51	17	30	29	25	20	32	19	37
37	ENSG00000112033	peroxisome proliferator-activated receptor delta	PPARD	15	11	-0.5	ENSG00000112033	0.141	0.703	0.703	0.815	-0.159	0.178	0.141	0.628	0.141	1.19	-1.134	-0.141	-0.646	-0.946	-1.021	-0.74	-1.227	-0.515	ENSG00000112033	PPARD	15	11	-0.5	0.3	13	16	16	16	11	13	13	15	13	18	6	11	9	7	7	8	6	9
37	ENSG00000121879	phosphoinositide-3-kinase, catalytic, alpha polypeptide	PIK3CA	24	13	-0.9	ENSG00000121879	5.449	-0.635	5.052	3.015	6.031	1.032	0.529	0.899	0.476	-0.344	-1.058	-0.317	-0.661	0.079	-0.688	-0.503	-1.111	-0.079	ENSG00000121879	PIK3CA	24	13	-0.9	0.5	33	10	31	23	35	16	14	15	14	11	8	11	10	12	9	10	8	12
37	ENSG00000171608	phosphoinositide-3-kinase, catalytic, delta polypeptide	PIK3CD	100	62	-0.7	ENSG00000171608	0.381	0.852	1.697	1.666	0.129	0.169	-0.245	0.937	0.734	1.697	-1.059	-0.129	-0.433	-0.229	-0.746	-0.615	-0.752	-0.208	ENSG00000171608	PIK3CD	100	62	-0.7	0.4	75	90	118	117	67	68	54	93	86	118	27	58	48	55	38	42	38	55
37	ENSG00000145675	phosphoinositide-3-kinase, regulatory subunit 1 (alpha)	PIK3R1	222	86	-1.4	ENSG00000145675	4.304	-0.54	4.506	5.677	4.974	1.538	0.975	0.015	0.844	-0.051	0.899	-0.015	-0.316	-0.591	-0.409	-0.336	-0.758	-0.536	ENSG00000145675	PIK3R1	222	86	-1.4	0.8	260	39	269	322	290	134	108	64	102	61	105	63	49	37	45	48	29	39
37	ENSG00000141506	phosphoinositide-3-kinase, regulatory subunit 5	PIK3R5	59	47	-0.3	ENSG00000141506	0.703	-0.017	0.774	1.025	-0.338	0.338	0.054	0.656	1.285	2.909	-0.532	-0.012	0.012	-0.627	-0.84	-0.693	-1.247	-0.831	ENSG00000141506	PIK3R5	59	47	-0.3	0.4	60	45	62	67	38	53	47	59	73	107	34	45	46	32	28	31	19	28
37	ENSG00000173039	v-rel reticuloendotheliosis viral oncogene homolog A (avian)	RELA	87	52	-0.8	ENSG00000173039	3.412	-0.295	2.606	3.412	2.351	0.707	-0.38	-0.052	0.367	0.052	-0.72	-0.642	-0.773	0.079	-0.131	-0.805	-1.074	0.301	ENSG00000173039	RELA	87	52	-0.8	0.4	105	48	92	105	88	63	47	52	58	53	41	43	41	54	50	40	36	57
38	Phosphatiditylinositol signaling	GENE NAME	Symbol	avgCON	avgAFF	log(a/c)	ENSG	N048	N068	N090	N098	L005	L137	L101	L062	L149	L140	L031	L072	L133	L074	L078	L102	L115	L027	pureENSG	gene	avgCON	avgAFF	log(a/c)	CV	N048	N068	N090	N098	L005	L137	L101	L062	L149	L140	L031	L072	L133	L074	L078	L102	L115	L027
38	ENSG00000065357	diacylglycerol kinase, alpha 80kDa	DGKA	205	181	-0.2	ENSG00000065357	0.04	1.553	1.777	1.276	-0.587	0.294	-0.299	2.524	4.018	6.827	-0.981	0.105	-0.527	-0.276	-0.762	-0.413	-0.811	-0.04	ENSG00000065357	DGKA	205	181	-0.2	0.7	130	231	246	212	89	147	108	295	395	582	62	135	93	109	77	100	74	125
38	ENSG00000143772	inositol 1,4,5-trisphosphate 3-kinase B	ITPKB	102	63	-0.7	ENSG00000143772	1.596	1.079	1.477	1.216	0.658	0.055	0.316	0.014	-0.773	-0.014	-1.061	0.384	-0.567	-0.69	-1.084	-0.334	-1.788	-0.466	ENSG00000143772	ITPKB	102	63	-0.7	0.3	107	96	105	99	87	73	79	73	55	72	49	81	60	57	49	65	33	62
38	ENSG00000121879	phosphoinositide-3-kinase, catalytic, alpha polypeptide	PIK3CA	24	13	-0.9	ENSG00000121879	5.449	-0.635	5.052	3.015	6.031	1.032	0.529	0.899	0.476	-0.344	-1.058	-0.317	-0.661	0.079	-0.688	-0.503	-1.111	-0.079	ENSG00000121879	PIK3CA	24	13	-0.9	0.5	33	10	31	23	35	16	14	15	14	11	8	11	10	12	9	10	8	12
38	ENSG00000171608	phosphoinositide-3-kinase, catalytic, delta polypeptide	PIK3CD	100	62	-0.7	ENSG00000171608	0.381	0.852	1.697	1.666	0.129	0.169	-0.245	0.937	0.734	1.697	-1.059	-0.129	-0.433	-0.229	-0.746	-0.615	-0.752	-0.208	ENSG00000171608	PIK3CD	100	62	-0.7	0.4	75	90	118	117	67	68	54	93	86	118	27	58	48	55	38	42	38	55
38	ENSG00000145675	phosphoinositide-3-kinase, regulatory subunit 1 (alpha)	PIK3R1	222	86	-1.4	ENSG00000145675	4.304	-0.54	4.506	5.677	4.974	1.538	0.975	0.015	0.844	-0.051	0.899	-0.015	-0.316	-0.591	-0.409	-0.336	-0.758	-0.536	ENSG00000145675	PIK3R1	222	86	-1.4	0.8	260	39	269	322	290	134	108	64	102	61	105	63	49	37	45	48	29	39
38	ENSG00000141506	phosphoinositide-3-kinase, regulatory subunit 5	PIK3R5	59	47	-0.3	ENSG00000141506	0.703	-0.017	0.774	1.025	-0.338	0.338	0.054	0.656	1.285	2.909	-0.532	-0.012	0.012	-0.627	-0.84	-0.693	-1.247	-0.831	ENSG00000141506	PIK3R5	59	47	-0.3	0.4	60	45	62	67	38	53	47	59	73	107	34	45	46	32	28	31	19	28
38	ENSG00000124181	phospholipase C, gamma 1	PLCG1	77	69	-0.2	ENSG00000124181	0.024	1.457	0.985	0.687	-0.684	0.027	-0.516	1.852	2.987	5.588	-1.076	0.137	-0.432	-0.422	-0.888	-0.341	-0.665	-0.024	ENSG00000124181	PLCG1	77	69	-0.2	0.7	53	97	83	74	31	53	36	110	145	225	19	57	39	39	25	42	32	52
39	B cell signaling	GENE NAME	Symbol	avgCON	avgAFF	log(a/c)	ENSG	N048	N068	N090	N098	L005	L137	L101	L062	L149	L140	L031	L072	L133	L074	L078	L102	L115	L027	pureENSG	gene	avgCON	avgAFF	log(a/c)	CV	N048	N068	N090	N098	L005	L137	L101	L062	L149	L140	L031	L072	L133	L074	L078	L102	L115	L027
39	ENSG00000177606	jun oncogene	JUN	80	43	-0.9	ENSG00000177606	5.244	-1.351	0.388	2.744	-0.344	2.575	0.359	0.344	-1.139	-0.764	-0.108	1.896	-0.07	0.585	-1.269	-0.301	0.07	-1.077	ENSG00000177606	JUN	80	43	-0.9	0.7	152	16	52	101	36	97	51	51	20	28	41	83	42	56	17	37	45	21
39	ENSG00000109320	nuclear factor of kappa light polypeptide gene enhancer in B-cells 1	NFKB1	45	32	-0.5	ENSG00000109320	2.468	-0.099	1.152	2.358	2.325	0.45	-0.033	0.165	-0.121	2.204	-1.568	-0.175	-0.197	-0.702	-1.217	0.033	-1.349	0.647	ENSG00000109320	NFKB1	45	32	-0.5	0.3	54	30	42	53	52	35	31	33	30	51	17	30	29	25	20	32	19	37
39	ENSG00000121879	phosphoinositide-3-kinase, catalytic, alpha polypeptide	PIK3CA	24	13	-0.9	ENSG00000121879	5.449	-0.635	5.052	3.015	6.031	1.032	0.529	0.899	0.476	-0.344	-1.058	-0.317	-0.661	0.079	-0.688	-0.503	-1.111	-0.079	ENSG00000121879	PIK3CA	24	13	-0.9	0.5	33	10	31	23	35	16	14	15	14	11	8	11	10	12	9	10	8	12
39	ENSG00000171608	phosphoinositide-3-kinase, catalytic, delta polypeptide	PIK3CD	100	62	-0.7	ENSG00000171608	0.381	0.852	1.697	1.666	0.129	0.169	-0.245	0.937	0.734	1.697	-1.059	-0.129	-0.433	-0.229	-0.746	-0.615	-0.752	-0.208	ENSG00000171608	PIK3CD	100	62	-0.7	0.4	75	90	118	117	67	68	54	93	86	118	27	58	48	55	38	42	38	55
39	ENSG00000145675	phosphoinositide-3-kinase, regulatory subunit 1 (alpha)	PIK3R1	222	86	-1.4	ENSG00000145675	4.304	-0.54	4.506	5.677	4.974	1.538	0.975	0.015	0.844	-0.051	0.899	-0.015	-0.316	-0.591	-0.409	-0.336	-0.758	-0.536	ENSG00000145675	PIK3R1	222	86	-1.4	0.8	260	39	269	322	290	134	108	64	102	61	105	63	49	37	45	48	29	39
39	ENSG00000141506	phosphoinositide-3-kinase, regulatory subunit 5	PIK3R5	59	47	-0.3	ENSG00000141506	0.703	-0.017	0.774	1.025	-0.338	0.338	0.054	0.656	1.285	2.909	-0.532	-0.012	0.012	-0.627	-0.84	-0.693	-1.247	-0.831	ENSG00000141506	PIK3R5	59	47	-0.3	0.4	60	45	62	67	38	53	47	59	73	107	34	45	46	32	28	31	19	28
39	ENSG00000173039	v-rel reticuloendotheliosis viral oncogene homolog A (avian)	RELA	87	52	-0.8	ENSG00000173039	3.412	-0.295	2.606	3.412	2.351	0.707	-0.38	-0.052	0.367	0.052	-0.72	-0.642	-0.773	0.079	-0.131	-0.805	-1.074	0.301	ENSG00000173039	RELA	87	52	-0.8	0.4	105	48	92	105	88	63	47	52	58	53	41	43	41	54	50	40	36	57
40	Fc Gamma R-mediated phagocytosis	GENE NAME	Symbol	avgCON	avgAFF	log(a/c)	ENSG	N048	N068	N090	N098	L005	L137	L101	L062	L149	L140	L031	L072	L133	L074	L078	L102	L115	L027	pureENSG	gene	avgCON	avgAFF	log(a/c)	CV	N048	N068	N090	N098	L005	L137	L101	L062	L149	L140	L031	L072	L133	L074	L078	L102	L115	L027
40	ENSG00000182541	LIM domain kinase 2	LIMK2	32	21	-0.6	ENSG00000182541	0.469	0.164	0.888	1.048	0.141	0.057	-0.827	0.301	0.171	2.031	-1.147	-0.057	-0.728	-0.812	-1.033	-0.309	-1.109	-0.621	ENSG00000182541	LIMK2	32	21	-0.6	0.5	29	25	35	37	25	24	12	27	25	50	8	22	14	13	10	19	9	15
40	ENSG00000121879	phosphoinositide-3-kinase, catalytic, alpha polypeptide	PIK3CA	24	13	-0.9	ENSG00000121879	5.449	-0.635	5.052	3.015	6.031	1.032	0.529	0.899	0.476	-0.344	-1.058	-0.317	-0.661	0.079	-0.688	-0.503	-1.111	-0.079	ENSG00000121879	PIK3CA	24	13	-0.9	0.5	33	10	31	23	35	16	14	15	14	11	8	11	10	12	9	10	8	12
40	ENSG00000171608	phosphoinositide-3-kinase, catalytic, delta polypeptide	PIK3CD	100	62	-0.7	ENSG00000171608	0.381	0.852	1.697	1.666	0.129	0.169	-0.245	0.937	0.734	1.697	-1.059	-0.129	-0.433	-0.229	-0.746	-0.615	-0.752	-0.208	ENSG00000171608	PIK3CD	100	62	-0.7	0.4	75	90	118	117	67	68	54	93	86	118	27	58	48	55	38	42	38	55
40	ENSG00000145675	phosphoinositide-3-kinase, regulatory subunit 1 (alpha)	PIK3R1	222	86	-1.4	ENSG00000145675	4.304	-0.54	4.506	5.677	4.974	1.538	0.975	0.015	0.844	-0.051	0.899	-0.015	-0.316	-0.591	-0.409	-0.336	-0.758	-0.536	ENSG00000145675	PIK3R1	222	86	-1.4	0.8	260	39	269	322	290	134	108	64	102	61	105	63	49	37	45	48	29	39
40	ENSG00000141506	phosphoinositide-3-kinase, regulatory subunit 5	PIK3R5	59	47	-0.3	ENSG00000141506	0.703	-0.017	0.774	1.025	-0.338	0.338	0.054	0.656	1.285	2.909	-0.532	-0.012	0.012	-0.627	-0.84	-0.693	-1.247	-0.831	ENSG00000141506	PIK3R5	59	47	-0.3	0.4	60	45	62	67	38	53	47	59	73	107	34	45	46	32	28	31	19	28
40	ENSG00000184381	phospholipase A2, group VI (cytosolic, calcium-independent)	PLA2G6	18	13	-0.5	ENSG00000184381	0.953	1.012	1.642	1.672	-0.631	0.718	-0.308	2.038	3.153	3.93	-0.631	0.293	-0.293	-0.323	-0.587	-0.543	-0.894	-0.323	ENSG00000184381	PLA2G6	18	13	-0.5	0.7	16	16	20	21	5	14	7	23	31	36	5	11	7	7	5	5	3	7
40	ENSG00000124181	phospholipase C, gamma 1	PLCG1	77	69	-0.2	ENSG00000124181	0.024	1.457	0.985	0.687	-0.684	0.027	-0.516	1.852	2.987	5.588	-1.076	0.137	-0.432	-0.422	-0.888	-0.341	-0.665	-0.024	ENSG00000124181	PLCG1	77	69	-0.2	0.7	53	97	83	74	31	53	36	110	145	225	19	57	39	39	25	42	32	52
41	Circadian Rhythm	GENE NAME	Symbol	avgCON	avgAFF	log(a/c)	ENSG	N048	N068	N090	N098	L005	L137	L101	L062	L149	L140	L031	L072	L133	L074	L078	L102	L115	L027	pureENSG	gene	avgCON	avgAFF	log(a/c)	CV	N048	N068	N090	N098	L005	L137	L101	L062	L149	L140	L031	L072	L133	L074	L078	L102	L115	L027
41	ENSG00000133794	aryl hydrocarbon receptor nuclear translocator-like	ARNTL	21	9	-1.2	ENSG00000133794	1.621	0.232	4.299	3.554	0.131	-0.03	-0.292	1.319	2.245	1.399	-0.695	0.03	-0.815	-0.594	-0.574	-0.654	-0.815	-0.534	ENSG00000133794	ARNTL	21	9	-1.2	0.6	17	10	30	27	10	9	8	16	20	16	6	9	5	6	6	6	5	6
41	ENSG00000141551	casein kinase 1, delta	CSNK1D	77	36	-1.1	ENSG00000141551	2.959	0.674	4.078	5.626	0.904	-0.038	-1.035	0.674	1.97	2.361	-1.426	-0.054	-0.414	-0.383	-0.483	-0.445	-0.659	0.038	ENSG00000141551	CSNK1D	77	36	-1.1	0.5	72	43	87	107	46	33	20	43	60	65	15	33	28	29	28	28	25	34
41	ENSG00000121671	cryptochrome 2 (photolyase-like)	CRY2	21	11	-0.9	ENSG00000121671	5.088	0.689	3.065	3.006	1.862	2.273	0.191	0.22	-0.308	0.103	-0.777	-0.132	-0.953	-0.513	-0.66	-0.249	-1.334	-0.103	ENSG00000121671	CRY2	21	11	-0.9	0.4	29	14	22	21	18	19	12	12	10	12	9	11	8	9	9	10	7	11
41	ENSG00000126368	nuclear receptor subfamily 1, group D, member 1	NR1D1	13	10	-0.4	ENSG00000126368	-0.044	2.211	0.111	-0.066	0.531	0.796	2.278	1.46	-0.442	-0.597	0.177	0.044	-1.305	-0.155	0.752	-1.349	-1.526	-0.885	ENSG00000126368	NR1D1	13	10	-0.4	0.4	11	21	11	10	13	14	21	17	9	8	12	11	5	10	14	5	4	7
41	ENSG00000179094	period homolog 1 (Drosophila)	PER1	148	37	-2	ENSG00000179094	5.061	-0.544	3.658	3.606	1.335	1.402	0.27	0.099	0.552	1.239	-0.503	-0.099	-0.402	-0.624	-0.709	-0.64	-0.758	-0.727	ENSG00000179094	PER1	148	37	-2	1.1	230	13	176	174	86	89	45	38	56	82	15	31	19	10	7	10	5	6
	Category	Term	Genes	Count	%	P-Value	Benjamini
42	INTERPRO	Protein kinase, core		31	5.5	9.5e-05	0.0085
43	INTERPRO	Nucleotide-binding, alpha-beta plait		19	3.4	7e-05	0.008
44	INTERPRO	RNA recognition motif, RNP-1		18	3.2	0.0002	0.012
45	INTERPRO	Zinc finger, PHD-type		13	2.3	1.4e-05	0.0028
46	INTERPRO	Helicase, superfamily 1 and 2, ATP-binding		13	2.3	7.9e-05	0.008
47	INTERPRO	DNA/RNA helicase, C-terminal		13	2.3	7.9e-05	0.008
48	INTERPRO	Basic-leucine zipper (bZIP) transcription factor		9	1.6	0.00016	0.011
49	INTERPRO	Nuclear hormone receptor, ligand-binding		7	1.2	0.0028	0.11
50	INTERPRO	Cyclin-like F-box		7	1.2	0.018	0.4
51	INTERPRO	Transcription factor jumonji		6	1.1	0.0006	0.032
52	INTERPRO	Transcription regulator cyclin		5	0.9	4.9e-05	0.0066
42	Protein Kinase	GENE NAME	Symbol	avgCON	avgAFF	log(a/c)	ENSG	N048	N068	N090	N098	L005	L137	L101	L062	L149	L140	L031	L072	L133	L074	L078	L102	L115	L027	pureENSG	gene	avgCON	avgAFF	log(a/c)	CV	N048	N068	N090	N098	L005	L137	L101	L062	L149	L140	L031	L072	L133	L074	L078	L102	L115	L027
42	ENSG00000115977	AP2 associated kinase 1	AAK1	19	11	-0.8	ENSG00000115977	0.917	-0.144	1.745	2.374	0.612	0.665	0.306	-2.086	0.917	2.05	-0.665	-0.683	0.144	-2.086	-0.522	-0.396	-1.223	-0.234	ENSG00000115977	AAK1	19	11	-0.8	0.6	17	11	21	25	15	15	13	0	17	23	8	8	13	0	9	10	5	10
42	ENSG00000013441	CDC-like kinase 1	CLK1	136	80	-0.8	ENSG00000013441	0.89	0.042	1.22	1.706	-0.476	1.239	-0.042	0.899	0.914	0.673	-0.676	0.804	-0.075	-0.318	-0.723	-0.343	-0.504	-0.315	ENSG00000013441	CLK1	136	80	-0.8	0.5	131	75	153	185	40	154	69	131	132	116	27	125	67	51	24	49	38	51
42	ENSG00000179335	CDC-like kinase 3	CLK3	73	52	-0.5	ENSG00000179335	1.004	0.164	0.69	0.956	-0.161	0.844	-0.229	0.867	0.659	1.212	-0.857	0.161	-0.311	-0.567	-0.69	-0.615	-0.775	-0.406	ENSG00000179335	CLK3	73	52	-0.5	0.4	82	57	73	81	48	77	46	78	72	88	27	57	43	36	32	35	30	41
42	ENSG00000113240	CDC-like kinase 4	CLK4	23	12	-0.9	ENSG00000113240	0.651	0.522	1.46	1.695	-0.628	0.651	-0.158	1.038	0.71	0.85	-1.05	0.158	-0.522	-0.663	-0.991	-0.686	-0.839	-0.346	ENSG00000113240	CLK4	23	12	-0.9	0.5	19	18	26	28	8	19	12	22	20	21	5	15	9	8	5	8	6	11
42	ENSG00000167258	Cdc2-related kinase, arginine/serine-rich	CDK12	26	17	-0.6	ENSG00000167258	0.996	0.054	1.317	1.039	0.653	0.332	-0.054	0.771	0.717	0.921	-0.546	-0.268	-0.578	-0.739	-0.674	-0.674	-1.295	-0.525	ENSG00000167258	CDK12	26	17	-0.6	0.4	28	19	31	28	24	21	18	26	25	27	13	16	13	11	12	12	6	13
42	ENSG00000182541	LIM domain kinase 2	LIMK2	32	21	-0.6	ENSG00000182541	0.469	0.164	0.888	1.048	0.141	0.057	-0.827	0.301	0.171	2.031	-1.147	-0.057	-0.728	-0.812	-1.033	-0.309	-1.109	-0.621	ENSG00000182541	LIMK2	32	21	-0.6	0.5	29	25	35	37	25	24	12	27	25	50	8	22	14	13	10	19	9	15
42	ENSG00000152520	PAN3 poly(A) specific ribonuclease subunit homolog (S. cerevisiae)	PAN3	20	13	-0.7	ENSG00000152520	0.667	0.039	1.812	1.388	0.102	0.384	-0.573	1.059	0.667	0.682	-1.09	-0.039	-0.824	-0.494	-0.886	-0.729	-1.027	-0.416	ENSG00000152520	PAN3	20	13	-0.7	0.4	18	14	26	23	15	17	11	21	18	19	7	14	9	11	9	10	8	12
42	ENSG00000115687	PAS domain containing serine/threonine kinase	PASK	91	45	-1	ENSG00000115687	1.066	-0.841	1.665	2.332	2.788	0.004	0.678	0.186	0.057	-0.64	-0.714	-0.131	-0.004	0.039	-0.96	-0.671	-1.142	-0.093	ENSG00000115687	PASK	91	45	-1	0.8	91	16	115	141	159	49	76	56	51	24	21	44	49	51	11	23	4	45
42	ENSG00000102225	PCTAIRE protein kinase 1	CDK16	35	13	-1.5	ENSG00000102225	2.746	0.494	2.533	4.169	-0.058	0.961	-0.621	0.887	1.174	1.715	-0.929	0.058	-0.175	-0.451	-0.632	-0.643	-0.706	-0.462	ENSG00000102225	CDK16	35	13	-1.5	0.8	38	17	36	51	11	21	6	20	23	28	3	13	10	8	6	6	5	8
42	ENSG00000059758	PCTAIRE protein kinase 2	CDK17	30	19	-0.6	ENSG00000059758	1.979	-0.414	3.112	3.615	2.878	0.935	0.018	0.773	0.234	0.648	-0.018	-0.198	-0.701	-0.288	-1.223	-0.342	-1.007	-0.252	ENSG00000059758	CDK17	30	19	-0.6	0.4	29	16	36	38	34	24	18	23	20	22	18	17	14	17	12	16	13	17
42	ENSG00000163788	SNF related kinase	SNRK	63	38	-0.7	ENSG00000163788	1.34	0.26	2.431	2.08	1.672	0.894	1.183	0.693	-0.392	-0.348	-0.091	0.06	-0.656	-0.348	-0.794	-0.21	-1.302	-0.06	ENSG00000163788	SNRK	63	38	-0.7	0.4	60	43	77	72	65	53	57	50	32	33	37	40	28	33	26	35	18	38
42	ENSG00000154310	TRAF2 and NCK interacting kinase	TNIK	23	14	-0.7	ENSG00000154310	1.822	-0.473	2.567	3.03	2.366	0.111	0.674	0.151	0.674	0.594	-0.815	-1.198	-0.111	-0.574	-0.715	-1.319	-0.433	-0.393	ENSG00000154310	TNIK	23	14	-0.7	0.4	23	12	27	29	26	15	17	15	17	17	10	8	13	11	10	7	12	12
42	ENSG00000145349	calcium/calmodulin-dependent protein kinase II delta	CAMK2D	19	11	-0.8	ENSG00000145349	4.475	-0.592	4.442	2.731	5.001	0.428	1.119	0.329	-0.79	-0.691	-0.526	-0.757	-0.263	0.263	-0.658	-0.296	-0.757	0.296	ENSG00000145349	CAMK2D	19	11	-0.8	0.4	25	9	25	19	26	12	14	12	9	9	9	9	10	12	9	10	9	12
42	ENSG00000152495	calcium/calmodulin-dependent protein kinase IV	CAMK4	55	38	-0.5	ENSG00000152495	0.467	0.012	0.775	1.308	0.728	0.598	0.219	-0.012	-0.929	0.379	-0.876	-0.669	-0.68	-0.243	-1.118	-0.893	-0.882	0.189	ENSG00000152495	CAMK4	55	38	-0.5	0.3	52	44	57	66	56	54	48	44	28	51	29	33	33	40	25	29	29	47
42	ENSG00000147044	calcium/calmodulin-dependent serine protein kinase (MAGUK family)	CASK	24	17	-0.5	ENSG00000147044	2.509	-0.818	1.898	1.286	1.736	2.257	2.095	0.099	0.081	-0.153	-0.009	0.009	-0.243	-0.225	-0.531	-1.142	-1.16	-0.243	ENSG00000147044	CASK	24	17	-0.5	0.3	31	13	28	24	27	30	29	18	18	16	17	17	16	16	14	11	11	16
42	ENSG00000141551	casein kinase 1, delta	CSNK1D	77	36	-1.1	ENSG00000141551	2.959	0.674	4.078	5.626	0.904	-0.038	-1.035	0.674	1.97	2.361	-1.426	-0.054	-0.414	-0.383	-0.483	-0.445	-0.659	0.038	ENSG00000141551	CSNK1D	77	36	-1.1	0.5	72	43	87	107	46	33	20	43	60	65	15	33	28	29	28	28	25	34
42	ENSG00000157540	dual-specificity tyrosine-(Y)-phosphorylation regulated kinase 1A	DYRK1A	72	52	-0.5	ENSG00000157540	1.494	-0.51	1.24	1.357	0.951	0.784	0.008	0.515	0.398	0.322	-0.819	-0.17	-0.008	-0.636	-0.981	-0.292	-1.397	-0.713	ENSG00000157540	DYRK1A	72	52	-0.5	0.3	84	45	79	82	74	70	55	65	63	61	39	51	55	42	35	49	27	41
42	ENSG00000172071	eukaryotic translation initiation factor 2-alpha kinase 3	EIF2AK3	18	9	-1	ENSG00000172071	2.864	0.033	2.621	1.869	1.294	0.52	-0.962	1.006	0.254	-0.033	-1.272	0.188	-0.232	-0.453	-1.205	-0.586	-0.763	-0.431	ENSG00000172071	EIF2AK3	18	9	-1	0.5	22	10	21	18	15	12	5	14	11	9	4	10	8	7	4	7	6	8
42	ENSG00000163349	homeodomain interacting protein kinase 1	HIPK1	27	20	-0.5	ENSG00000163349	1.057	0.017	1.389	1.275	0.989	0.657	-0.017	0.897	0.692	1.092	-0.875	-0.143	-0.532	-0.189	-0.509	-0.28	-0.829	-0.223	ENSG00000163349	HIPK1	27	20	-0.5	0.3	28	19	31	30	28	25	19	27	25	28	11	18	14	17	14	16	12	17
42	ENSG00000076984	mitogen-activated protein kinase kinase 7	MAP2K7	20	12	-0.7	ENSG00000076984	1.453	0.394	2.656	1.743	0.291	0.104	-0.747	0.623	1.183	1.847	-1.162	-0.54	-0.104	-0.353	-0.706	-0.892	-0.643	-0.311	ENSG00000076984	MAP2K7	20	12	-0.7	0.4	20	14	25	21	14	13	9	16	18	21	7	10	12	11	9	8	9	11
42	ENSG00000095015	mitogen-activated protein kinase kinase kinase 1	MAP3K1	27	24	-0.2	ENSG00000095015	1.129	0.157	0.751	-0.364	0.436	0.787	0.796	1.506	2.172	-0.373	-1.192	0.823	-0.598	-0.211	-0.193	-0.58	-1.138	-0.157	ENSG00000095015	MAP3K1	27	24	-0.2	0.4	35	24	31	18	27	31	31	39	46	18	9	31	16	20	20	16	10	21
42	ENSG00000006062	mitogen-activated protein kinase kinase kinase 14	MAP3K14	17	13	-0.5	ENSG00000006062	0.488	0.26	0.878	0.309	-0.26	0.26	-0.65	0.845	0.699	0.601	-1.593	0.455	-0.569	-1.04	-0.796	-1.056	-1.316	-0.699	ENSG00000006062	MAP3K14	17	13	-0.5	0.4	17	16	20	16	13	16	10	20	19	18	5	17	11	8	9	8	6	10
42	ENSG00000071054	mitogen-activated protein kinase kinase kinase kinase 4	MAP4K4	50	35	-0.5	ENSG00000071054	0.888	0.061	0.902	0.929	0.258	0.895	0.319	-0.061	0.176	0.393	-1.315	-0.407	-0.488	-0.902	-0.644	-0.834	-1.39	-0.705	ENSG00000071054	MAP4K4	50	35	-0.5	0.3	53	41	53	53	44	53	44	39	42	46	20	34	33	26	30	27	19	29
42	ENSG00000198355	pim-3 oncogene	PIM3	97	55	-0.8	ENSG00000198355	4.629	-0.67	0.531	0.592	1.205	2.057	0.279	-0.689	0.457	-0.35	0.215	0.879	-0.215	-0.534	-0.679	-1.238	-1.351	-1.344	ENSG00000198355	PIM3	97	55	-0.8	0.7	201	37	74	76	95	122	67	37	72	47	65	85	51	41	37	20	16	16
42	ENSG00000173846	polo-like kinase 3 (Drosophila)	PLK3	67	20	-1.8	ENSG00000173846	1.686	-0.066	2.483	4.958	0.151	0.39	0.066	0.109	0.645	0.656	-0.81	-0.289	-0.534	-0.72	-0.762	-0.81	-0.98	-0.693	ENSG00000173846	PLK3	67	20	-1.8	0.9	56	23	71	118	27	32	26	27	37	37	9	19	14	11	10	9	6	11
42	ENSG00000065675	protein kinase C, theta	PRKCQ	37	27	-0.5	ENSG00000065675	0.776	-0.194	0.679	1.552	0.67	1.296	0.749	0.053	0.176	0.247	-0.45	-0.053	-0.141	-0.564	-0.82	-0.829	-1.49	-0.838	ENSG00000065675	PRKCQ	37	27	-0.5	0.3	38	27	37	47	37	44	38	30	31	32	24	29	28	23	20	20	13	20
42	ENSG00000142178	salt-inducible kinase 1	SIK1	82	18	-2.2	ENSG00000142178	8.34	-0.78	5.361	6.422	2.579	2.185	-0.295	-0.211	0.752	0.035	-0.218	-0.035	0.71	-0.4	0.218	-0.597	-0.639	-0.815	ENSG00000142178	SIK1	82	18	-2.2	1.2	132	2	89	104	50	44	9	10	24	14	10	13	23	7	16	5	4	1
42	ENSG00000101109	serine/threonine kinase 4	STK4	81	55	-0.5	ENSG00000101109	1.076	-0.227	1.352	1.708	0.278	0.227	0.577	0.296	0.588	0.491	-1.633	-1.036	-0.72	-0.554	-1.105	-0.669	-1.846	-0.68	ENSG00000101109	STK4	81	55	-0.5	0.3	82	60	87	93	68	67	74	69	74	72	35	45	51	54	44	52	31	52
42	ENSG00000112739	similar to hCG1820375; PRP4 pre-mRNA processing factor 4 homolog B (yeast)	PRPF4B	18	10	-0.8	ENSG00000112739	1.987	0.582	2.097	2.042	1.506	-0.009	-0.508	1.1	2.042	1.894	-0.767	-0.213	-0.342	-0.249	-0.342	-0.323	-0.915	0.009	ENSG00000112739	PRPF4B	18	10	-0.8	0.5	19	12	20	20	17	9	6	15	20	19	5	8	7	7	7	7	4	9
42	ENSG00000146872	tousled-like kinase 2	TLK2	21	14	-0.6	ENSG00000146872	1.095	-0.239	1.11	0.936	-0.022	0.674	0.08	0.544	0.37	0.66	-1.182	0.022	-0.428	-0.892	-0.965	-0.936	-1.023	-0.674	ENSG00000146872	TLK2	21	14	-0.6	0.3	24	14	24	22	16	21	17	20	19	21	8	16	13	10	9	10	9	11
42	ENSG00000163513	transforming growth factor, beta receptor II (70/80kDa)	TGFBR2	98	62	-0.7	ENSG00000163513	1.923	0.473	2.266	3.006	2.958	-0.035	0.497	0.225	-1.201	-0.509	-0.497	-0.006	-0.882	-0.923	-0.84	0.444	-2.018	0.006	ENSG00000163513	TGFBR2	98	62	-0.7	0.3	98	74	104	117	116	65	74	70	45	57	57	66	51	50	52	73	32	66
43	Nucleotide Binding	GENE NAME	Symbol	avgCON	avgAFF	log(a/c)	ENSG	N048	N068	N090	N098	L005	L137	L101	L062	L149	L140	L031	L072	L133	L074	L078	L102	L115	L027	pureENSG	gene	avgCON	avgAFF	log(a/c)	CV	N048	N068	N090	N098	L005	L137	L101	L062	L149	L140	L031	L072	L133	L074	L078	L102	L115	L027
43	ENSG00000149187	CUG triplet repeat, RNA binding protein 1	CELF1	18	15	-0.3	ENSG00000149187	0.23	0.928	1.325	1.246	0.278	0.056	-0.595	1.405	2.452	3.785	-1.008	-0.056	-0.294	-0.341	-0.754	-0.357	-0.928	-0.341	ENSG00000149187	CELF1	18	15	-0.3	0.5	14	18	21	20	14	13	9	21	28	36	6	12	11	10	8	10	7	10
43	ENSG00000138757	GTPase activating protein (SH3 domain) binding protein 2	G3BP2	133	73	-0.9	ENSG00000138757	7.447	-0.869	5.667	6.264	9.782	2.421	1.971	-0.037	0.641	0.807	0.037	-0.314	-0.191	-0.105	-0.708	-0.16	-0.499	-0.339	ENSG00000138757	G3BP2	133	73	-0.9	0.6	179	44	150	160	217	97	90	57	68	71	58	53	55	56	46	55	50	52
43	ENSG00000213079	RNA binding motif protein 16	SCAF8	33	19	-0.8	ENSG00000213079	2.988	0.017	3.227	2.817	2.152	1.52	0.529	0.563	0.478	-0.171	-0.888	-0.017	-0.973	-0.734	-0.615	-0.376	-1.776	-0.273	ENSG00000213079	SCAF8	33	19	-0.8	0.4	37	20	39	36	32	29	23	23	22	19	14	20	14	15	16	17	9	18
43	ENSG00000119707	RNA binding motif protein 25	RBM25	25	21	-0.3	ENSG00000119707	0.319	1.18	1.63	1.393	-0.019	0.368	-0.856	2.379	3.291	4.415	-1.33	0.019	-0.194	-0.418	-0.493	-0.381	-1.093	-0.056	ENSG00000119707	RBM25	25	21	-0.3	0.6	19	26	29	27	16	19	9	35	43	52	6	16	15	13	12	13	8	16
43	ENSG00000132819	RNA binding motif protein 38	RBM38	309	121	-1.4	ENSG00000132819	7.21	-0.482	4.064	5.9	3.863	2.421	1.612	-0.488	-0.077	-0.206	0.254	0.077	0.294	-0.48	-0.521	-0.828	-0.942	-0.834	ENSG00000132819	RBM38	309	121	-1.4	0.7	455	86	304	392	294	225	186	85	105	99	121	113	123	86	84	69	64	69
43	ENSG00000003756	RNA binding motif protein 5	RBM5	62	39	-0.6	ENSG00000003756	0.408	2.29	2.936	2.604	-0.508	0.678	-0.489	3.005	3.281	4.549	-1.255	0.1	-0.188	-0.621	-0.671	-0.188	-0.834	-0.1	ENSG00000003756	RBM5	62	39	-0.6	0.7	35	65	76	70	21	40	21	77	81	101	9	30	26	19	18	26	15	27
43	ENSG00000139718	SET domain containing 1B	SETD1B	41	17	-1.2	ENSG00000139718	1.382	-0.129	2.422	2.407	0.512	0.416	0.129	0.358	0.343	0.962	-0.807	-0.203	-0.542	-0.638	-0.881	-0.733	-1.139	-0.711	ENSG00000139718	SETD1B	41	17	-1.2	0.6	39	18	53	53	27	26	22	25	25	33	9	17	13	11	8	10	4	10
43	ENSG00000100813	apoptotic chromatin condensation inducer 1	ACIN1	62	42	-0.6	ENSG00000100813	0.236	1.19	1.039	0.753	-0.735	0.354	-0.541	1.267	1.629	1.974	-1.039	0.108	-0.108	-0.588	-0.614	-0.5	-1.039	-0.464	ENSG00000100813	ACIN1	62	42	-0.6	0.6	46	72	68	60	20	49	25	74	84	94	11	43	37	24	23	26	11	27
43	ENSG00000169045	heterogeneous nuclear ribonucleoprotein H1 (H)	HNRNPH1	327	263	-0.3	ENSG00000169045	0.234	0.777	1.922	1.558	-0.797	0.57	-0.597	2.045	3.258	4.971	-1.103	0.247	-0.234	-0.321	-0.53	-0.411	-0.752	-0.259	ENSG00000169045	HNRNPH1	327	263	-0.3	0.7	222	286	421	378	101	262	125	435	577	779	65	224	167	157	133	147	107	164
43	ENSG00000116604	myocyte enhancer factor 2D	MEF2D	38	18	-1.1	ENSG00000116604	4.348	-0.716	1.992	2.449	1.774	1.494	0.633	0.073	0.114	-0.073	0.197	-0.208	-0.259	-0.467	-0.54	-0.789	-1.038	-0.83	ENSG00000116604	MEF2D	38	18	-1.1	0.6	60	12	38	42	36	33	25	19	20	18	20	16	16	14	13	11	8	10
43	ENSG00000162231	nuclear RNA export factor 1	NXF1	64	45	-0.5	ENSG00000162231	0.985	0.272	1.211	2.134	-0.531	0.861	-0.235	0.942	1.708	1.686	-0.817	0.208	-0.208	-0.456	-0.424	-0.359	-1.201	-0.44	ENSG00000162231	NXF1	64	45	-0.5	0.4	61	48	65	82	33	59	39	60	75	74	28	47	39	34	35	36	21	35
43	ENSG00000131051	similar to RNA binding motif protein 39; RNA binding motif protein 39	RBM39	211	130	-0.7	ENSG00000131051	1.348	0.11	1.039	1.372	-0.331	1.157	-0.16	0.541	0.807	1.144	-0.478	0.052	-0.052	-0.642	-0.707	-0.587	-1.033	-0.711	ENSG00000131051	RBM39	211	130	-0.7	0.4	243	141	217	245	104	227	118	176	198	226	92	136	127	79	73	83	46	73
43	ENSG00000065526	spen homolog, transcriptional regulator (Drosophila)	SPEN	22	15	-0.6	ENSG00000065526	0.292	0.207	1.206	0.25	-0.218	0.101	-0.101	1.004	0.813	0.451	-1.269	0.271	-0.664	-0.951	-0.728	-0.781	-1.429	-0.685	ENSG00000065526	SPEN	22	15	-0.6	0.4	20	19	29	20	15	18	16	27	25	22	5	20	11	8	11	10	4	11
43	ENSG00000116560	splicing factor proline/glutamine-rich (polypyrimidine tract binding protein associated)	SFPQ	166	104	-0.7	ENSG00000116560	1.999	-0.011	2.048	1.76	1.261	0.671	-0.472	0.491	1.093	0.713	-1.118	0.011	-0.418	-0.477	-0.624	-0.678	-1.175	-0.367	ENSG00000116560	SFPQ	166	104	-0.7	0.4	190	104	192	180	158	133	84	125	151	135	57	105	87	84	78	76	54	89
43	ENSG00000116754	splicing factor, arginine/serine-rich 11	SRSF11	62	52	-0.3	ENSG00000116754	0.151	0.383	1.628	1.397	-0.689	0.329	-0.739	1.392	3.751	3.826	-0.929	0.068	-0.068	-0.341	-0.66	-0.494	-0.817	-0.308	ENSG00000116754	SRSF11	62	52	-0.3	0.7	44	50	80	75	24	49	23	74	131	133	18	42	39	33	25	29	21	33
43	ENSG00000161547	splicing factor, arginine/serine-rich 2	SRSF2	123	86	-0.5	ENSG00000161547	1.276	0.018	1.513	2.809	-0.041	0.863	-0.363	0.714	1.996	2.522	-0.647	0.884	-0.018	-0.369	-0.629	-0.41	-0.702	-0.638	ENSG00000161547	SRSF2	123	86	-0.5	0.4	118	75	126	171	73	104	62	99	143	161	53	105	74	62	53	61	51	53
43	ENSG00000124193	splicing factor, arginine/serine-rich 6; similar to arginine/serine-rich splicing factor 6	SRSF6	93	54	-0.8	ENSG00000124193	1.208	0.338	1.755	2.229	0.317	0.662	-0.893	0.536	0.683	1.099	-1.792	-0.481	-0.666	-0.54	-1.196	-0.574	-1.204	-0.317	ENSG00000124193	SRSF6	93	54	-0.8	0.4	88	68	101	113	67	75	38	72	76	86	17	48	44	47	31	46	31	52
43	ENSG00000115875	splicing factor, arginine/serine-rich 7, 35kDa	SRSF7	166	107	-0.6	ENSG00000115875	0.889	-0.338	1.39	2.68	-0.635	1.464	-0.403	0.5	0.714	0.363	-0.169	0.245	0.169	-0.466	-0.803	-0.82	-1.11	-0.942	ENSG00000115875	SRSF7	166	107	-0.6	0.4	153	95	177	238	81	180	92	134	145	128	103	122	119	89	73	72	58	66
43	ENSG00000075856	squamous cell carcinoma antigen recognized by T cells 3	SART3	28	17	-0.8	ENSG00000075856	1.852	1.149	2.612	3.03	0.959	0.446	-0.598	0.75	0.978	-0.009	-1.472	-0.256	-0.028	-0.598	-0.541	-0.085	-1.339	0.009	ENSG00000075856	SART3	28	17	-0.8	0.3	27	23	31	33	22	19	14	21	22	17	9	15	17	14	14	16	10	17
44	RNA recognition	GENE NAME	Symbol	avgCON	avgAFF	log(a/c)	ENSG	N048	N068	N090	N098	L005	L137	L101	L062	L149	L140	L031	L072	L133	L074	L078	L102	L115	L027	pureENSG	gene	avgCON	avgAFF	log(a/c)	CV	N048	N068	N090	N098	L005	L137	L101	L062	L149	L140	L031	L072	L133	L074	L078	L102	L115	L027
44	ENSG00000149187	CUG triplet repeat, RNA binding protein 1	CELF1	18	15	-0.3	ENSG00000149187	0.23	0.928	1.325	1.246	0.278	0.056	-0.595	1.405	2.452	3.785	-1.008	-0.056	-0.294	-0.341	-0.754	-0.357	-0.928	-0.341	ENSG00000149187	CELF1	18	15	-0.3	0.5	14	18	21	20	14	13	9	21	28	36	6	12	11	10	8	10	7	10
44	ENSG00000138757	GTPase activating protein (SH3 domain) binding protein 2	G3BP2	133	73	-0.9	ENSG00000138757	7.447	-0.869	5.667	6.264	9.782	2.421	1.971	-0.037	0.641	0.807	0.037	-0.314	-0.191	-0.105	-0.708	-0.16	-0.499	-0.339	ENSG00000138757	G3BP2	133	73	-0.9	0.6	179	44	150	160	217	97	90	57	68	71	58	53	55	56	46	55	50	52
44	ENSG00000213079	RNA binding motif protein 16	SCAF8	33	19	-0.8	ENSG00000213079	2.988	0.017	3.227	2.817	2.152	1.52	0.529	0.563	0.478	-0.171	-0.888	-0.017	-0.973	-0.734	-0.615	-0.376	-1.776	-0.273	ENSG00000213079	SCAF8	33	19	-0.8	0.4	37	20	39	36	32	29	23	23	22	19	14	20	14	15	16	17	9	18
44	ENSG00000119707	RNA binding motif protein 25	RBM25	25	21	-0.3	ENSG00000119707	0.319	1.18	1.63	1.393	-0.019	0.368	-0.856	2.379	3.291	4.415	-1.33	0.019	-0.194	-0.418	-0.493	-0.381	-1.093	-0.056	ENSG00000119707	RBM25	25	21	-0.3	0.6	19	26	29	27	16	19	9	35	43	52	6	16	15	13	12	13	8	16
44	ENSG00000132819	RNA binding motif protein 38	RBM38	309	121	-1.4	ENSG00000132819	7.21	-0.482	4.064	5.9	3.863	2.421	1.612	-0.488	-0.077	-0.206	0.254	0.077	0.294	-0.48	-0.521	-0.828	-0.942	-0.834	ENSG00000132819	RBM38	309	121	-1.4	0.7	455	86	304	392	294	225	186	85	105	99	121	113	123	86	84	69	64	69
44	ENSG00000003756	RNA binding motif protein 5	RBM5	62	39	-0.6	ENSG00000003756	0.408	2.29	2.936	2.604	-0.508	0.678	-0.489	3.005	3.281	4.549	-1.255	0.1	-0.188	-0.621	-0.671	-0.188	-0.834	-0.1	ENSG00000003756	RBM5	62	39	-0.6	0.7	35	65	76	70	21	40	21	77	81	101	9	30	26	19	18	26	15	27
44	ENSG00000139718	SET domain containing 1B	SETD1B	41	17	-1.2	ENSG00000139718	1.382	-0.129	2.422	2.407	0.512	0.416	0.129	0.358	0.343	0.962	-0.807	-0.203	-0.542	-0.638	-0.881	-0.733	-1.139	-0.711	ENSG00000139718	SETD1B	41	17	-1.2	0.6	39	18	53	53	27	26	22	25	25	33	9	17	13	11	8	10	4	10
44	ENSG00000100813	apoptotic chromatin condensation inducer 1	ACIN1	62	42	-0.6	ENSG00000100813	0.236	1.19	1.039	0.753	-0.735	0.354	-0.541	1.267	1.629	1.974	-1.039	0.108	-0.108	-0.588	-0.614	-0.5	-1.039	-0.464	ENSG00000100813	ACIN1	62	42	-0.6	0.6	46	72	68	60	20	49	25	74	84	94	11	43	37	24	23	26	11	27
44	ENSG00000169045	heterogeneous nuclear ribonucleoprotein H1 (H)	HNRNPH1	327	263	-0.3	ENSG00000169045	0.234	0.777	1.922	1.558	-0.797	0.57	-0.597	2.045	3.258	4.971	-1.103	0.247	-0.234	-0.321	-0.53	-0.411	-0.752	-0.259	ENSG00000169045	HNRNPH1	327	263	-0.3	0.7	222	286	421	378	101	262	125	435	577	779	65	224	167	157	133	147	107	164
44	ENSG00000116604	myocyte enhancer factor 2D	MEF2D	38	18	-1.1	ENSG00000116604	4.348	-0.716	1.992	2.449	1.774	1.494	0.633	0.073	0.114	-0.073	0.197	-0.208	-0.259	-0.467	-0.54	-0.789	-1.038	-0.83	ENSG00000116604	MEF2D	38	18	-1.1	0.6	60	12	38	42	36	33	25	19	20	18	20	16	16	14	13	11	8	10
44	ENSG00000131051	similar to RNA binding motif protein 39; RNA binding motif protein 39	RBM39	211	130	-0.7	ENSG00000131051	1.348	0.11	1.039	1.372	-0.331	1.157	-0.16	0.541	0.807	1.144	-0.478	0.052	-0.052	-0.642	-0.707	-0.587	-1.033	-0.711	ENSG00000131051	RBM39	211	130	-0.7	0.4	243	141	217	245	104	227	118	176	198	226	92	136	127	79	73	83	46	73
44	ENSG00000065526	spen homolog, transcriptional regulator (Drosophila)	SPEN	22	15	-0.6	ENSG00000065526	0.292	0.207	1.206	0.25	-0.218	0.101	-0.101	1.004	0.813	0.451	-1.269	0.271	-0.664	-0.951	-0.728	-0.781	-1.429	-0.685	ENSG00000065526	SPEN	22	15	-0.6	0.4	20	19	29	20	15	18	16	27	25	22	5	20	11	8	11	10	4	11
44	ENSG00000116560	splicing factor proline/glutamine-rich (polypyrimidine tract binding protein associated)	SFPQ	166	104	-0.7	ENSG00000116560	1.999	-0.011	2.048	1.76	1.261	0.671	-0.472	0.491	1.093	0.713	-1.118	0.011	-0.418	-0.477	-0.624	-0.678	-1.175	-0.367	ENSG00000116560	SFPQ	166	104	-0.7	0.4	190	104	192	180	158	133	84	125	151	135	57	105	87	84	78	76	54	89
44	ENSG00000116754	splicing factor, arginine/serine-rich 11	SRSF11	62	52	-0.3	ENSG00000116754	0.151	0.383	1.628	1.397	-0.689	0.329	-0.739	1.392	3.751	3.826	-0.929	0.068	-0.068	-0.341	-0.66	-0.494	-0.817	-0.308	ENSG00000116754	SRSF11	62	52	-0.3	0.7	44	50	80	75	24	49	23	74	131	133	18	42	39	33	25	29	21	33
44	ENSG00000161547	splicing factor, arginine/serine-rich 2	SRSF2	123	86	-0.5	ENSG00000161547	1.276	0.018	1.513	2.809	-0.041	0.863	-0.363	0.714	1.996	2.522	-0.647	0.884	-0.018	-0.369	-0.629	-0.41	-0.702	-0.638	ENSG00000161547	SRSF2	123	86	-0.5	0.4	118	75	126	171	73	104	62	99	143	161	53	105	74	62	53	61	51	53
44	ENSG00000124193	splicing factor, arginine/serine-rich 6; similar to arginine/serine-rich splicing factor 6	SRSF6	93	54	-0.8	ENSG00000124193	1.208	0.338	1.755	2.229	0.317	0.662	-0.893	0.536	0.683	1.099	-1.792	-0.481	-0.666	-0.54	-1.196	-0.574	-1.204	-0.317	ENSG00000124193	SRSF6	93	54	-0.8	0.4	88	68	101	113	67	75	38	72	76	86	17	48	44	47	31	46	31	52
44	ENSG00000115875	splicing factor, arginine/serine-rich 7, 35kDa	SRSF7	166	107	-0.6	ENSG00000115875	0.889	-0.338	1.39	2.68	-0.635	1.464	-0.403	0.5	0.714	0.363	-0.169	0.245	0.169	-0.466	-0.803	-0.82	-1.11	-0.942	ENSG00000115875	SRSF7	166	107	-0.6	0.4	153	95	177	238	81	180	92	134	145	128	103	122	119	89	73	72	58	66
44	ENSG00000075856	squamous cell carcinoma antigen recognized by T cells 3	SART3	28	17	-0.8	ENSG00000075856	1.852	1.149	2.612	3.03	0.959	0.446	-0.598	0.75	0.978	-0.009	-1.472	-0.256	-0.028	-0.598	-0.541	-0.085	-1.339	0.009	ENSG00000075856	SART3	28	17	-0.8	0.3	27	23	31	33	22	19	14	21	22	17	9	15	17	14	14	16	10	17
45	Zinc Finger PHD	GENE NAME	Symbol	avgCON	avgAFF	log(a/c)	ENSG	N048	N068	N090	N098	L005	L137	L101	L062	L149	L140	L031	L072	L133	L074	L078	L102	L115	L027	pureENSG	gene	avgCON	avgAFF	log(a/c)	CV	N048	N068	N090	N098	L005	L137	L101	L062	L149	L140	L031	L072	L133	L074	L078	L102	L115	L027
45	ENSG00000083168	MYST histone acetyltransferase (monocytic leukemia) 3	KAT6A	37	24	-0.7	ENSG00000083168	2.337	-0.088	2.674	3.686	1.758	1.18	0.731	1.453	0.361	0.088	-0.618	-0.345	-0.104	-0.811	-0.586	-0.602	-2.256	-0.442	ENSG00000083168	KAT6A	37	24	-0.7	0.3	38	23	40	47	35	31	28	33	26	24	20	22	23	19	20	20	10	21
45	ENSG00000109118	PHD finger protein 12	PHF12	80	38	-1.1	ENSG00000109118	1.357	-0.058	1.623	2.586	0.27	0.732	0.058	0.331	0.17	0.482	-0.867	-0.162	-0.436	-0.709	-0.84	-0.752	-1.187	-0.64	ENSG00000109118	PHF12	80	38	-1.1	0.5	79	43	86	111	51	63	46	53	49	57	22	40	33	26	22	25	13	28
45	ENSG00000077684	PHD finger protein 17	PHF17	20	12	-0.8	ENSG00000077684	7.787	0.307	6.316	7.481	5.457	4.415	2.33	0.184	-0.674	-0.552	-0.245	-0.981	-0.245	-0.368	-0.674	0.307	-1.962	-0.184	ENSG00000077684	PHF17	20	12	-0.8	0.4	24	12	22	24	20	19	15	12	10	10	11	10	11	11	10	12	8	11
45	ENSG00000118482	PHD finger protein 3	PHF3	29	16	-0.9	ENSG00000118482	1.714	0.031	2.234	2.073	1.009	0.823	-0.031	0.662	0.316	0.452	-1.083	-0.229	-0.6	-0.835	-0.687	-0.65	-1.442	-0.328	ENSG00000118482	PHF3	29	16	-0.9	0.5	31	17	35	33	25	23	16	22	19	20	8	15	12	10	11	11	5	14
45	ENSG00000171634	bromodomain PHD finger transcription factor	BPTF	27	20	-0.4	ENSG00000171634	0.68	1.156	0.913	0.416	-0.659	0.162	-0.325	1.552	1.562	1.319	-1.329	0.791	-0.203	-0.669	-0.619	-0.335	-1.207	-0.162	ENSG00000171634	BPTF	27	20	-0.4	0.4	26	31	28	23	13	21	16	34	35	32	6	27	17	13	13	16	7	18
45	ENSG00000100425	bromodomain containing 1	BRD1	27	12	-1.1	ENSG00000100425	1.325	0.706	3.103	4.61	0.992	-0.214	-0.611	0.548	1.214	2.055	-0.96	-0.119	-0.722	-0.309	-0.643	-0.309	-0.389	0.119	ENSG00000100425	BRD1	27	12	-1.1	0.6	20	16	31	40	18	10	7	15	19	24	5	11	7	9	7	9	9	12
45	ENSG00000170004	chromodomain helicase DNA binding protein 3	CHD3	92	74	-0.3	ENSG00000170004	-0.182	1.585	0.775	0.461	-0.563	0.67	-0.013	1.037	1.968	2.245	-0.766	0.303	-0.679	-0.408	-0.752	-0.591	-0.989	0.013	ENSG00000170004	CHD3	92	74	-0.3	0.4	62	124	96	85	48	92	68	105	138	148	41	79	44	54	42	47	33	69
45	ENSG00000071243	inhibitor of growth family, member 3	ING3	22	15	-0.6	ENSG00000071243	1.781	-0.522	1.583	2.212	1.529	1.475	0.396	-0.036	0.036	-0.827	-0.108	0.072	0.18	-0.432	-0.719	-0.63	-0.899	-0.737	ENSG00000071243	ING3	22	15	-0.6	0.3	25	12	24	27	23	23	17	15	15	10	14	15	16	12	11	11	10	11
45	ENSG00000173120	lysine (K)-specific demethylase 2A	KDM2A	74	34	-1.1	ENSG00000173120	2.064	0.414	2.136	-0.674	1.2	1.761	-0.674	-0.674	1.146	-0.674	0.082	-0.674	-0.674	0.091	-0.019	-0.055	-0.286	0.019	ENSG00000173120	KDM2A	74	34	-1.1	1	122	49	125	0	84	109	0	0	81	0	34	0	0	34	29	28	17	31
45	ENSG00000005483	myeloid/lymphoid or mixed-lineage leukemia 5 (trithorax homolog, Drosophila)	KMT2E	54	34	-0.7	ENSG00000005483	1.66	-0.394	1.785	2.297	0.879	1.307	0.242	0.719	0.228	0.401	-0.567	-0.484	-0.228	-0.719	-0.643	-0.706	-1.425	-0.367	ENSG00000005483	KMT2E	54	34	-0.7	0.4	59	29	60	68	47	54	38	45	38	40	26	28	31	24	25	24	14	29
45	ENSG00000048649	remodeling and spacing factor 1	RSF1	20	15	-0.4	ENSG00000048649	1.114	-0.659	0.462	0.978	0.341	1.538	0.144	0.311	0.189	0.326	-0.917	-0.432	-0.144	-0.69	-1.16	-0.902	-1.463	-1.008	ENSG00000048649	RSF1	20	15	-0.4	0.3	24	12	20	23	19	27	18	19	18	19	11	14	16	12	9	11	7	10
45	ENSG00000100207	transcription factor 20 (AR1)	TCF20	23	15	-0.6	ENSG00000100207	0.474	0.359	1.249	0.66	-0.144	0.187	0.043	0.732	0.689	-0.043	-1.579	0.344	-0.373	-1.062	-1.076	-0.89	-1.722	-0.732	ENSG00000100207	TCF20	23	15	-0.6	0.3	21	21	27	23	17	19	18	23	23	18	7	21	16	11	11	12	6	13
45	ENSG00000147854	ubiquitin-like with PHD and ring finger domains 2	UHRF2	26	18	-0.5	ENSG00000147854	0.111	0.301	1.604	1.36	-0.713	0.636	-0.362	1.604	1.627	2.176	-0.873	0.423	-0.111	-0.4	-0.713	-0.37	-0.713	-0.415	ENSG00000147854	UHRF2	26	18	-0.5	0.7	16	19	36	33	6	23	10	36	36	43	3	20	13	10	6	10	6	9
46	Helicase Superfamily	GENE NAME	Symbol	avgCON	avgAFF	log(a/c)	ENSG	N048	N068	N090	N098	L005	L137	L101	L062	L149	L140	L031	L072	L133	L074	L078	L102	L115	L027	pureENSG	gene	avgCON	avgAFF	log(a/c)	CV	N048	N068	N090	N098	L005	L137	L101	L062	L149	L140	L031	L072	L133	L074	L078	L102	L115	L027
46	ENSG00000100201	DEAD (Asp-Glu-Ala-Asp) box polypeptide 17	DDX17	58	68	0.2	ENSG00000100201	-0.116	1.979	2.02	0.707	-1.024	0.069	-0.642	4.551	9.852	11.231	-1.179	0.594	-0.051	0.051	-0.242	-0.469	-1.549	-0.463	ENSG00000100201	DDX17	58	68	0.2	0.9	37	72	72	50	21	40	28	115	204	227	19	49	38	39	35	31	13	31
46	ENSG00000089737	DEAD (Asp-Glu-Ala-Asp) box polypeptide 24	DDX24	109	72	-0.6	ENSG00000089737	2.255	-0.54	2.241	2.751	1.12	1.773	0.146	0.22	0.415	0.679	-0.452	-0.29	-0.679	-0.146	-0.67	-1.171	-1.115	-0.313	ENSG00000089737	DDX24	109	72	-0.6	0.3	122	62	122	133	97	111	76	78	82	88	63	67	59	70	59	48	49	66
46	ENSG00000215301	DEAD (Asp-Glu-Ala-Asp) box polypeptide 3, X-linked	DDX3X	166	112	-0.6	ENSG00000215301	3.463	-0.046	2.209	2.196	3.657	1.174	0.792	0.557	-0.414	-0.884	-0.836	-0.284	-0.111	-0.029	-0.407	0.424	-1.122	0.029	ENSG00000215301	DDX3X	166	112	-0.6	0.3	210	107	173	173	215	143	131	124	96	82	84	100	105	107	96	121	75	109
46	ENSG00000213782	DEAD (Asp-Glu-Ala-Asp) box polypeptide 47	DDX47	45	30	-0.6	ENSG00000213782	4.302	-0.602	3.919	3.318	3.245	2.06	0.747	0.036	0.201	0.091	-0.547	-0.036	-0.602	-1.094	-1.495	-0.529	-2.151	-0.474	ENSG00000213782	DDX47	45	30	-0.6	0.3	53	26	51	48	47	41	34	30	31	30	27	29	26	24	21	27	18	27
46	ENSG00000136271	DEAD (Asp-Glu-Ala-Asp) box polypeptide 56	DDX56	39	24	-0.7	ENSG00000136271	0.949	0.577	2.168	2.307	-0.084	0.242	-0.642	0.54	1.768	2.093	-1.265	0.084	-0.102	-0.688	-0.763	-0.661	-0.875	-0.363	ENSG00000136271	DDX56	39	24	-0.7	0.4	34	30	47	48	22	26	16	29	42	46	10	24	22	16	15	16	14	19
46	ENSG00000110367	DEAD (Asp-Glu-Ala-Asp) box polypeptide 6	DDX6	98	49	-1	ENSG00000110367	3.951	0.061	3.357	3.083	3.017	1.263	0.751	0.928	0.304	-0.061	-0.735	-0.299	-0.553	-0.37	-0.614	-0.345	-0.994	-0.132	ENSG00000110367	DDX6	98	49	-1	0.5	124	47	112	107	106	71	61	65	52	45	32	40	35	39	34	39	27	44
46	ENSG00000174953	DEAH (Asp-Glu-Ala-His) box polypeptide 36	DHX36	35	19	-0.9	ENSG00000174953	0.697	0.31	2.897	3.196	0.365	0.188	-0.652	0.785	1.437	1.847	-1.095	-0.188	-0.597	-0.575	-1.028	-0.575	-0.874	-0.265	ENSG00000174953	DHX36	35	19	-0.9	0.5	26	22	46	48	23	21	13	26	32	36	9	18	14	14	10	14	11	17
46	ENSG00000140829	DEAH (Asp-Glu-Ala-His) box polypeptide 38	DHX38	24	17	-0.5	ENSG00000140829	0.695	1.109	2.23	2.07	-0.548	0.013	-0.668	1.589	2.791	4.087	-0.775	0	-0.067	-0.134	-0.147	-0.307	-0.681	0	ENSG00000140829	DHX38	24	17	-0.5	0.6	18	21	30	29	9	13	8	25	34	44	7	13	13	12	12	11	8	13
46	ENSG00000067596	DEAH (Asp-Glu-Ala-His) box polypeptide 8	DHX8	25	15	-0.8	ENSG00000067596	3.428	0.022	3.096	3.074	3.184	1.061	0.332	0.155	0.509	-0.044	-0.752	-0.022	-0.442	-0.84	-0.442	-0.597	-1.835	-0.774	ENSG00000067596	DHX8	25	15	-0.8	0.4	30	15	29	28	29	19	16	15	17	14	11	14	13	11	13	12	6	11
46	ENSG00000153922	chromodomain helicase DNA binding protein 1	CHD1	43	17	-1.4	ENSG00000153922	1.401	0.015	3.294	3.033	1.491	0.238	-0.581	0.581	0.887	0.313	-0.939	-0.015	-0.693	-0.656	-0.797	-0.544	-0.76	-0.313	ENSG00000153922	CHD1	43	17	-1.4	0.8	36	18	62	58	37	21	10	25	29	22	5	17	8	9	7	10	7	13
46	ENSG00000173575	chromodomain helicase DNA binding protein 2	CHD2	39	25	-0.6	ENSG00000173575	0.138	0.607	1.391	1.153	-0.678	0.434	-0.241	1.063	0.736	1.494	-1.07	0.119	-0.395	-0.671	-0.883	-0.581	-1.005	-0.119	ENSG00000173575	CHD2	39	25	-0.6	0.5	28	35	47	44	15	33	22	42	37	49	9	28	20	15	12	17	10	24
46	ENSG00000170004	chromodomain helicase DNA binding protein 3	CHD3	92	74	-0.3	ENSG00000170004	-0.182	1.585	0.775	0.461	-0.563	0.67	-0.013	1.037	1.968	2.245	-0.766	0.303	-0.679	-0.408	-0.752	-0.591	-0.989	0.013	ENSG00000170004	CHD3	92	74	-0.3	0.4	62	124	96	85	48	92	68	105	138	148	41	79	44	54	42	47	33	69
46	ENSG00000163161	excision repair cross-complementing rodent repair deficiency, complementation group 3 (xeroderma pigmentosum group B complementing)	ERCC3	22	18	-0.3	ENSG00000163161	0.248	0.633	1.377	0.716	0.248	0.124	-0.564	1.514	2.051	3.221	-1.143	-0.124	-0.317	-0.633	-0.853	-0.578	-1.046	-0.798	ENSG00000163161	ERCC3	22	18	-0.3	0.5	19	21	27	22	19	18	13	28	32	40	8	16	14	12	11	13	9	11
47	DNA/RNA Helicase	GENE NAME	Symbol	avgCON	avgAFF	log(a/c)	ENSG	N048	N068	N090	N098	L005	L137	L101	L062	L149	L140	L031	L072	L133	L074	L078	L102	L115	L027	pureENSG	gene	avgCON	avgAFF	log(a/c)	CV	N048	N068	N090	N098	L005	L137	L101	L062	L149	L140	L031	L072	L133	L074	L078	L102	L115	L027
47	ENSG00000100201	DEAD (Asp-Glu-Ala-Asp) box polypeptide 17	DDX17	58	68	0.2	ENSG00000100201	-0.116	1.979	2.02	0.707	-1.024	0.069	-0.642	4.551	9.852	11.231	-1.179	0.594	-0.051	0.051	-0.242	-0.469	-1.549	-0.463	ENSG00000100201	DDX17	58	68	0.2	0.9	37	72	72	50	21	40	28	115	204	227	19	49	38	39	35	31	13	31
47	ENSG00000089737	DEAD (Asp-Glu-Ala-Asp) box polypeptide 24	DDX24	109	72	-0.6	ENSG00000089737	2.255	-0.54	2.241	2.751	1.12	1.773	0.146	0.22	0.415	0.679	-0.452	-0.29	-0.679	-0.146	-0.67	-1.171	-1.115	-0.313	ENSG00000089737	DDX24	109	72	-0.6	0.3	122	62	122	133	97	111	76	78	82	88	63	67	59	70	59	48	49	66
47	ENSG00000215301	DEAD (Asp-Glu-Ala-Asp) box polypeptide 3, X-linked	DDX3X	166	112	-0.6	ENSG00000215301	3.463	-0.046	2.209	2.196	3.657	1.174	0.792	0.557	-0.414	-0.884	-0.836	-0.284	-0.111	-0.029	-0.407	0.424	-1.122	0.029	ENSG00000215301	DDX3X	166	112	-0.6	0.3	210	107	173	173	215	143	131	124	96	82	84	100	105	107	96	121	75	109
47	ENSG00000213782	DEAD (Asp-Glu-Ala-Asp) box polypeptide 47	DDX47	45	30	-0.6	ENSG00000213782	4.302	-0.602	3.919	3.318	3.245	2.06	0.747	0.036	0.201	0.091	-0.547	-0.036	-0.602	-1.094	-1.495	-0.529	-2.151	-0.474	ENSG00000213782	DDX47	45	30	-0.6	0.3	53	26	51	48	47	41	34	30	31	30	27	29	26	24	21	27	18	27
47	ENSG00000136271	DEAD (Asp-Glu-Ala-Asp) box polypeptide 56	DDX56	39	24	-0.7	ENSG00000136271	0.949	0.577	2.168	2.307	-0.084	0.242	-0.642	0.54	1.768	2.093	-1.265	0.084	-0.102	-0.688	-0.763	-0.661	-0.875	-0.363	ENSG00000136271	DDX56	39	24	-0.7	0.4	34	30	47	48	22	26	16	29	42	46	10	24	22	16	15	16	14	19
47	ENSG00000110367	DEAD (Asp-Glu-Ala-Asp) box polypeptide 6	DDX6	98	49	-1	ENSG00000110367	3.951	0.061	3.357	3.083	3.017	1.263	0.751	0.928	0.304	-0.061	-0.735	-0.299	-0.553	-0.37	-0.614	-0.345	-0.994	-0.132	ENSG00000110367	DDX6	98	49	-1	0.5	124	47	112	107	106	71	61	65	52	45	32	40	35	39	34	39	27	44
47	ENSG00000174953	DEAH (Asp-Glu-Ala-His) box polypeptide 36	DHX36	35	19	-0.9	ENSG00000174953	0.697	0.31	2.897	3.196	0.365	0.188	-0.652	0.785	1.437	1.847	-1.095	-0.188	-0.597	-0.575	-1.028	-0.575	-0.874	-0.265	ENSG00000174953	DHX36	35	19	-0.9	0.5	26	22	46	48	23	21	13	26	32	36	9	18	14	14	10	14	11	17
47	ENSG00000140829	DEAH (Asp-Glu-Ala-His) box polypeptide 38	DHX38	24	17	-0.5	ENSG00000140829	0.695	1.109	2.23	2.07	-0.548	0.013	-0.668	1.589	2.791	4.087	-0.775	0	-0.067	-0.134	-0.147	-0.307	-0.681	0	ENSG00000140829	DHX38	24	17	-0.5	0.6	18	21	30	29	9	13	8	25	34	44	7	13	13	12	12	11	8	13
47	ENSG00000067596	DEAH (Asp-Glu-Ala-His) box polypeptide 8	DHX8	25	15	-0.8	ENSG00000067596	3.428	0.022	3.096	3.074	3.184	1.061	0.332	0.155	0.509	-0.044	-0.752	-0.022	-0.442	-0.84	-0.442	-0.597	-1.835	-0.774	ENSG00000067596	DHX8	25	15	-0.8	0.4	30	15	29	28	29	19	16	15	17	14	11	14	13	11	13	12	6	11
47	ENSG00000173575	chromodomain helicase DNA binding protein 2	CHD2	39	25	-0.6	ENSG00000173575	0.138	0.607	1.391	1.153	-0.678	0.434	-0.241	1.063	0.736	1.494	-1.07	0.119	-0.395	-0.671	-0.883	-0.581	-1.005	-0.119	ENSG00000173575	CHD2	39	25	-0.6	0.5	28	35	47	44	15	33	22	42	37	49	9	28	20	15	12	17	10	24
47	ENSG00000170004	chromodomain helicase DNA binding protein 3	CHD3	92	74	-0.3	ENSG00000170004	-0.182	1.585	0.775	0.461	-0.563	0.67	-0.013	1.037	1.968	2.245	-0.766	0.303	-0.679	-0.408	-0.752	-0.591	-0.989	0.013	ENSG00000170004	CHD3	92	74	-0.3	0.4	62	124	96	85	48	92	68	105	138	148	41	79	44	54	42	47	33	69
47	ENSG00000163161	excision repair cross-complementing rodent repair deficiency, complementation group 3 (xeroderma pigmentosum group B complementing)	ERCC3	22	18	-0.3	ENSG00000163161	0.248	0.633	1.377	0.716	0.248	0.124	-0.564	1.514	2.051	3.221	-1.143	-0.124	-0.317	-0.633	-0.853	-0.578	-1.046	-0.798	ENSG00000163161	ERCC3	22	18	-0.3	0.5	19	21	27	22	19	18	13	28	32	40	8	16	14	12	11	13	9	11
47	ENSG00000156502	suppressor of var1, 3-like 1 (S. cerevisiae)	SUPV3L1	19	10	-0.9	ENSG00000156502	1.415	-0.033	2.566	2.287	0.773	0.411	-0.378	0.214	1.069	1.694	-0.691	0.033	-0.329	-0.494	-0.707	-0.247	-0.757	-0.658	ENSG00000156502	SUPV3L1	19	10	-0.9	0.5	18	9	25	23	14	12	7	11	16	20	5	10	7	6	5	8	5	5
48	bZIP TF	GENE NAME	Symbol	avgCON	avgAFF	log(a/c)	ENSG	N048	N068	N090	N098	L005	L137	L101	L062	L149	L140	L031	L072	L133	L074	L078	L102	L115	L027	pureENSG	gene	avgCON	avgAFF	log(a/c)	CV	N048	N068	N090	N098	L005	L137	L101	L062	L149	L140	L031	L072	L133	L074	L078	L102	L115	L027
48	ENSG00000112182	BTB and CNC homology 1, basic leucine zipper transcription factor 2	BACH2	29	12	-1.2	ENSG00000112182	2.791	0.08	2.679	1.924	1.627	0.204	0.712	0.316	-0.811	0.674	-0.6	-0.674	-0.278	-0.65	-1.145	-0.08	-0.749	-0.13	ENSG00000112182	BACH2	29	12	-1.2	0.6	36	14	35	29	27	15	19	16	7	19	9	8	11	8	4	13	7	12
48	ENSG00000137504	CREB/ATF bZIP transcription factor	CREBZF	12	12	0	ENSG00000137504	0.478	0.759	1.134	0.871	-0.347	0.365	-0.571	2.07	4.169	6.192	-0.778	0.328	-0.328	-0.59	-0.74	-0.628	-0.721	-0.478	ENSG00000137504	CREBZF	12	12	0	0.9	11	12	14	13	6	10	5	19	30	41	4	10	6	5	4	5	4	6
48	ENSG00000175197	DNA-damage-inducible transcript 3	DDIT3	19	12	-0.6	ENSG00000175197	1.211	-0.724	0.525	0.945	-0.359	1.355	0.326	0.625	0.149	-0.006	0.083	0.006	-0.547	-0.879	-0.912	-1.012	-1.178	-1.078	ENSG00000175197	DDIT3	19	12	-0.6	0.5	25	8	19	23	11	26	17	20	15	14	15	14	9	6	6	5	3	4
48	ENSG00000075426	FOS-like antigen 2	FOSL2	126	32	-2	ENSG00000075426	6.301	-0.837	5.327	8.336	5.218	1.687	1.011	-0.023	0.407	0.023	1.107	-0.128	-0.389	-0.293	-0.101	-0.549	-0.645	-0.704	ENSG00000075426	FOSL2	126	32	-2	1.1	159	3	138	204	135	58	43	21	30	22	46	19	13	15	19	9	7	6
48	ENSG00000095794	cAMP responsive element modulator	CREM	135	41	-1.7	ENSG00000095794	10.569	-1.349	11.09	21.156	20.16	1.693	0.661	-0.335	-0.009	-0.809	0.447	-0.623	0.009	-0.456	-0.828	-0.688	0.037	-0.456	ENSG00000095794	CREM	135	41	-1.7	1.3	138	10	143	251	241	42	31	20	24	15	29	17	24	19	15	17	24	19
48	ENSG00000130522	jun D proto-oncogene	JUND	460	209	-1.1	ENSG00000130522	10.076	-0.829	2.068	5.06	2.761	3.219	0.131	-0.412	-0.543	-0.294	-0.43	0.749	0.158	-0.131	-0.6	-1.033	0.149	-1.186	ENSG00000130522	JUND	460	209	-1.1	0.7	847	141	329	523	374	403	204	168	160	176	167	244	205	187	156	128	205	118
48	ENSG00000177606	jun oncogene	JUN	80	43	-0.9	ENSG00000177606	5.244	-1.351	0.388	2.744	-0.344	2.575	0.359	0.344	-1.139	-0.764	-0.108	1.896	-0.07	0.585	-1.269	-0.301	0.07	-1.077	ENSG00000177606	JUN	80	43	-0.9	0.7	152	16	52	101	36	97	51	51	20	28	41	83	42	56	17	37	45	21
48	ENSG00000116044	nuclear factor (erythroid-derived 2)-like 2	NFE2L2	71	29	-1.3	ENSG00000116044	7.942	-0.274	4.98	5.751	6.015	1.248	1.085	0.152	-0.091	0.223	-0.061	0.061	-0.73	-0.629	-0.72	-0.325	-1.156	-0.396	ENSG00000116044	NFE2L2	71	29	-1.3	0.7	104	23	74	82	85	38	36	27	24	28	25	26	18	19	18	22	14	21
48	ENSG00000198517	v-maf musculoaponeurotic fibrosarcoma oncogene homolog K (avian)	MAFK	25	8	-1.6	ENSG00000198517	8.963	0.013	5.227	5.72	4.008	0.895	0.35	-0.039	2.452	3.359	-0.35	-0.143	-0.013	-0.713	-0.61	-0.636	-0.506	-0.739	ENSG00000198517	MAFK	25	8	-1.6	0.9	40	6	26	28	21	9	7	6	15	19	4	5	6	3	3	3	4	3
49	Nuclear Hormone	GENE NAME	Symbol	avgCON	avgAFF	log(a/c)	ENSG	N048	N068	N090	N098	L005	L137	L101	L062	L149	L140	L031	L072	L133	L074	L078	L102	L115	L027	pureENSG	gene	avgCON	avgAFF	log(a/c)	CV	N048	N068	N090	N098	L005	L137	L101	L062	L149	L140	L031	L072	L133	L074	L078	L102	L115	L027
49	ENSG00000069667	RAR-related orphan receptor A	RORA	37	21	-0.8	ENSG00000069667	1.031	-0.796	1.444	1.529	0.678	0.219	0.468	0.612	0.56	0.023	-0.023	-0.462	-0.586	-0.671	-0.717	-0.92	-1.077	-0.953	ENSG00000069667	RORA	37	21	-0.8	0.5	41	13	47	48	35	28	32	34	33	25	24	18	16	15	14	11	8	10
49	ENSG00000126368	nuclear receptor subfamily 1, group D, member 1	NR1D1	13	10	-0.4	ENSG00000126368	-0.044	2.211	0.111	-0.066	0.531	0.796	2.278	1.46	-0.442	-0.597	0.177	0.044	-1.305	-0.155	0.752	-1.349	-1.526	-0.885	ENSG00000126368	NR1D1	13	10	-0.4	0.4	11	21	11	10	13	14	21	17	9	8	12	11	5	10	14	5	4	7
49	ENSG00000113580	nuclear receptor subfamily 3, group C, member 1 (glucocorticoid receptor)	NR3C1	47	29	-0.7	ENSG00000113580	2.275	-0.691	2.339	4.17	2.318	1.226	0.83	0.455	0.273	-0.958	0.658	-0.38	-0.605	-0.273	-0.284	-0.605	-1.237	-0.412	ENSG00000113580	NR3C1	47	29	-0.7	0.4	50	22	50	67	50	40	36	33	31	19	34	25	23	26	26	23	17	24
49	ENSG00000123358	nuclear receptor subfamily 4, group A, member 1	NR4A1	20	9	-1.1	ENSG00000123358	4.721	-0.6	1.504	0.501	1.429	0.291	-0.514	-0.006	0.006	-0.773	-0.613	0.674	1.615	-0.167	2.172	-0.674	-0.687	-0.786	ENSG00000123358	NR4A1	20	9	-1.1	1	45	2	19	11	19	10	3	7	7	1	2	13	20	6	25	2	2	1
49	ENSG00000153234	nuclear receptor subfamily 4, group A, member 2	NR4A2	165	25	-2.7	ENSG00000153234	20.055	-0.73	11.937	18.235	12.001	5.591	0.315	-0.315	0.403	-0.435	0.02	-0.02	0.068	-0.443	-0.698	-0.659	-0.69	-0.762	ENSG00000153234	NR4A2	165	25	-2.7	1.6	261	1	160	238	160	80	14	6	15	5	10	10	11	4	1	2	1	0
49	ENSG00000112033	peroxisome proliferator-activated receptor delta	PPARD	15	11	-0.5	ENSG00000112033	0.141	0.703	0.703	0.815	-0.159	0.178	0.141	0.628	0.141	1.19	-1.134	-0.141	-0.646	-0.946	-1.021	-0.74	-1.227	-0.515	ENSG00000112033	PPARD	15	11	-0.5	0.3	13	16	16	16	11	13	13	15	13	18	6	11	9	7	7	8	6	9
49	ENSG00000126351	thyroid hormone receptor, alpha (erythroblastic leukemia viral (v-erb-a) oncogene homolog, avian)	THRA	23	13	-0.8	ENSG00000126351	1.72	1.311	1.069	0.796	0.462	0.447	0.053	0.083	-0.765	0.538	-0.053	-0.25	-0.811	-0.584	-0.735	-0.872	-1.144	-0.614	ENSG00000126351	THRA	23	13	-0.8	0.3	27	24	22	20	18	18	16	16	10	19	15	14	10	11	10	9	8	11
50	Cyclin F Box	GENE NAME	Symbol	avgCON	avgAFF	log(a/c)	ENSG	N048	N068	N090	N098	L005	L137	L101	L062	L149	L140	L031	L072	L133	L074	L078	L102	L115	L027	pureENSG	gene	avgCON	avgAFF	log(a/c)	CV	N048	N068	N090	N098	L005	L137	L101	L062	L149	L140	L031	L072	L133	L074	L078	L102	L115	L027
50	ENSG00000005812	F-box and leucine-rich repeat protein 3	FBXL3	51	28	-0.9	ENSG00000005812	12.639	-0.337	10.069	10.969	13.474	4.834	5.251	0.369	0.594	-0.112	0.08	-0.08	-1.654	-0.755	-0.434	-0.241	-3.774	-0.273	ENSG00000005812	FBXL3	51	28	-0.9	0.5	64	24	56	59	67	40	41	26	27	24	25	25	20	22	23	24	13	24
50	ENSG00000138081	F-box protein 11	FBXO11	27	21	-0.4	ENSG00000138081	0.408	0.098	0.618	0.169	-0.689	0.492	-0.098	0.66	0.885	0.478	-1.194	0.464	-1.194	-1.279	-1.251	-1.124	-2.108	-1.504	ENSG00000138081	FBXO11	27	21	-0.4	0.3	27	25	29	26	20	28	24	29	31	28	16	28	16	15	16	16	9	14
50	ENSG00000110429	F-box protein 3	FBXO3	21	14	-0.6	ENSG00000110429	0.815	0.272	2.688	1.943	1.923	0.03	-0.05	0.936	0.674	0.151	-0.795	-0.312	-0.674	-0.03	-0.735	-0.453	-1.359	-0.292	ENSG00000110429	FBXO3	21	14	-0.6	0.3	18	15	27	24	24	14	14	19	17	15	10	13	11	14	10	12	7	13
50	ENSG00000165355	F-box protein 33	FBXO33	32	18	-0.8	ENSG00000165355	2.664	-0.803	0.512	1.323	0.615	0.734	0.393	0.068	-0.085	0.085	-0.555	-0.009	0.009	-0.785	-0.896	-0.82	-1.204	-0.982	ENSG00000165355	FBXO33	32	18	-0.8	0.5	53	12	27	37	29	30	26	22	20	22	15	21	21	12	11	12	7	10
50	ENSG00000178974	F-box protein 34	FBXO34	30	17	-0.8	ENSG00000178974	4.704	-0.415	4.842	9.374	6.745	1.487	0.242	-0.173	0.035	-1.522	-1.176	0.311	-0.934	-0.311	-0.242	-0.035	-2.179	0.277	ENSG00000178974	FBXO34	30	17	-0.8	0.4	30	15	31	44	36	21	17	16	17	12	13	18	14	16	16	17	10	17
50	ENSG00000173120	lysine (K)-specific demethylase 2A	KDM2A	74	34	-1.1	ENSG00000173120	2.064	0.414	2.136	-0.674	1.2	1.761	-0.674	-0.674	1.146	-0.674	0.082	-0.674	-0.674	0.091	-0.019	-0.055	-0.286	0.019	ENSG00000173120	KDM2A	74	34	-1.1	1	122	49	125	0	84	109	0	0	81	0	34	0	0	34	29	28	17	31
50	ENSG00000011007	transcription elongation factor B (SIII), polypeptide 3 (110kDa, elongin A)	TCEB3	17	12	-0.5	ENSG00000011007	1.551	-0.809	1.13	1.197	0.793	1.332	0.708	-0.219	-0.017	-0.607	0.017	0.067	0.135	-0.489	-0.304	-0.641	-1.13	-0.793	ENSG00000011007	TCEB3	17	12	-0.5	0.4	22	8	20	20	18	21	17	12	13	9	13	13	14	10	11	9	6	8
51	TF Jumonji	GENE NAME	Symbol	avgCON	avgAFF	log(a/c)	ENSG	N048	N068	N090	N098	L005	L137	L101	L062	L149	L140	L031	L072	L133	L074	L078	L102	L115	L027	pureENSG	gene	avgCON	avgAFF	log(a/c)	CV	N048	N068	N090	N098	L005	L137	L101	L062	L149	L140	L031	L072	L133	L074	L078	L102	L115	L027
51	ENSG00000171988	jumonji domain containing 1C	JMJD1C	25	14	-0.8	ENSG00000171988	0.728	0.175	1.029	0.796	-0.068	0.175	-0.446	0.291	0.281	0.582	-1.223	0.068	-0.903	-1.019	-1.116	-0.689	-1.087	-0.66	ENSG00000171988	JMJD1C	25	14	-0.8	0.5	25	19	28	26	17	19	13	21	21	24	5	18	8	7	6	11	6	11
51	ENSG00000070495	jumonji domain containing 6	JMJD6	40	16	-1.3	ENSG00000070495	4.238	-0.744	2.549	4.015	1.338	2.061	0.117	-0.467	0.276	0.181	-0.51	0	0	-0.542	-0.637	-0.977	-1.115	-0.712	ENSG00000070495	JMJD6	40	16	-1.3	0.7	56	9	40	54	29	35	17	12	19	18	11	16	16	11	10	7	6	9
51	ENSG00000173120	lysine (K)-specific demethylase 2A	KDM2A	74	34	-1.1	ENSG00000173120	2.064	0.414	2.136	-0.674	1.2	1.761	-0.674	-0.674	1.146	-0.674	0.082	-0.674	-0.674	0.091	-0.019	-0.055	-0.286	0.019	ENSG00000173120	KDM2A	74	34	-1.1	1	122	49	125	0	84	109	0	0	81	0	34	0	0	34	29	28	17	31
51	ENSG00000115548	lysine (K)-specific demethylase 3A	KDM3A	41	25	-0.7	ENSG00000115548	0.649	0.025	1.331	1.231	0.427	0.377	-0.025	0.527	0.57	0.434	-1.015	-0.169	-0.922	-0.936	-1.173	-1.015	-1.439	-0.7	ENSG00000115548	KDM3A	41	25	-0.7	0.4	39	30	48	47	36	35	29	37	38	36	16	27	17	17	13	16	10	20
51	ENSG00000120733	lysine (K)-specific demethylase 3B	KDM3B	23	15	-0.6	ENSG00000120733	0.244	0.656	3.166	2.23	-0.356	0.393	-0.693	1.799	2.192	2.061	-1.536	0.15	-0.656	-0.6	-0.618	-0.806	-1.424	-0.15	ENSG00000120733	KDM3B	23	15	-0.6	0.4	16	18	31	26	13	17	11	24	26	25	6	15	11	11	11	10	7	14
51	ENSG00000147050	lysine (K)-specific demethylase 6A	KDM6A	31	20	-0.6	ENSG00000147050	1.876	0.105	2.087	1.595	0.274	1.244	0.878	1.215	-0.105	-0.4	-0.443	0.429	-0.415	-0.836	-0.949	-0.485	-1.539	-0.513	ENSG00000147050	KDM6A	31	20	-0.6	0.3	34	21	35	32	23	29	27	29	20	18	17	24	18	15	14	17	10	17
52	Tx Reg Cyclin	GENE NAME	Symbol	avgCON	avgAFF	log(a/c)	ENSG	N048	N068	N090	N098	L005	L137	L101	L062	L149	L140	L031	L072	L133	L074	L078	L102	L115	L027	pureENSG	gene	avgCON	avgAFF	log(a/c)	CV	N048	N068	N090	N098	L005	L137	L101	L062	L149	L140	L031	L072	L133	L074	L078	L102	L115	L027
52	ENSG00000134480	cyclin H	CCNH	30	19	-0.7	ENSG00000134480	4.397	-0.713	3.074	5.824	4.138	1.051	0.195	-0.065	-0.558	0.947	0.065	-0.195	0.636	-0.324	-1.258	-0.61	-0.791	-0.454	ENSG00000134480	CCNH	30	19	-0.7	0.4	35	15	29	40	34	22	18	17	15	21	18	17	20	16	13	15	15	16
52	ENSG00000163660	cyclin L1	CCNL1	107	71	-0.6	ENSG00000163660	1.068	0.104	1.169	1.415	-0.395	1.321	-0.307	1.144	1.317	2.194	-0.721	0.67	-0.104	-0.278	-0.679	-0.303	-0.511	-0.386	ENSG00000163660	CCNL1	107	71	-0.6	0.6	114	61	120	133	33	128	38	118	128	176	15	92	49	40	18	38	27	34
52	ENSG00000221978	cyclin L2; chemokine (C-C motif) receptor 6	CCNL2	42	29	-0.5	ENSG00000221978	1.257	1.6	2.782	2.899	-0.411	0.687	-0.369	2.757	5.982	6.686	-0.855	0.36	-0.36	-0.452	-0.628	-0.377	-0.662	-0.369	ENSG00000221978	CCNL2	42	29	-0.5	0.9	31	35	49	51	11	24	12	49	88	96	6	20	12	11	9	12	8	12
52	ENSG00000129315	cyclin T1	CCNT1	24	10	-1.3	ENSG00000129315	2.398	-0.491	2.63	2.807	1.826	1.131	0.164	0.286	0.409	0.327	-0.722	-0.164	-0.695	-0.654	-0.818	-0.572	-0.954	-0.586	ENSG00000129315	CCNT1	24	10	-1.3	0.7	28	7	30	31	24	19	12	12	13	13	5	9	5	6	4	6	3	6
52	ENSG00000082258	cyclin T2	CCNT2	16	11	-0.5	ENSG00000082258	0.709	0.213	1.153	1.272	-0.179	0.282	-0.06	1.255	0.862	1.323	-0.692	0.06	-0.657	-0.657	-0.794	-0.316	-0.965	-0.384	ENSG00000082258	CCNT2	16	11	-0.5	0.4	16	13	18	19	10	13	11	19	16	19	7	12	8	8	7	10	6	9
[truncated: 172 more columns]

## Sheet: Genes_Down_mRNA
These are, for each CUFFDIFF comparison, the list of genes with <1.5x decreased (Down) mRNA expression, the count for which is the last number in the headers.
					REFINED COMPARISON
CONvSLE(4/14)_DN_355	CONvSLEf(4/12)_DN_424	FvM3_DN_2554	FvM2_DN_2639	C0AvBC_DN_570	C0AfvBC_DN_597	CONvT0_DN_281	wtVaMOD_DN_1168	WTmVa_DN_1401	wtVb_DN_714	WTmodVb_DN_724	wtVc1_DN_868	WTmodVc_DN_925	BvC_DN_400	BvC2_DN_387	NvLo_DN_320	NvLoPlus_DN_427	LvH_DN_357	LvH2_DN_237	LvHfnoCON_DN_237	DSabNEGvPOS_DN_121	DSabCONvPOS_DN_625	DSabWTvNEG_DN_324	DSabWTvPOS_DN_556	DSabNEGvPOSw149_DN_111	LOCOMP_DN_94	REGvLOCOMP_DN_88	HEMA_DN_241	PROTA_DN_196	HEPRO_DN_194	PRED_DN_160	HYDRO_DN_132	nNORM_DN_425
ENSG00000167996	ENSG00000167996	ENSG00000177954	ENSG00000177954	ENSG00000188536	ENSG00000244734	ENSG00000204525	ENSG00000213741	ENSG00000213741	ENSG00000167996	ENSG00000244734	ENSG00000211592	ENSG00000211592	ENSG00000211592	ENSG00000211592	ENSG00000167996	ENSG00000167996	ENSG00000167996	ENSG00000244734	ENSG00000244734	ENSG00000244734	ENSG00000167996	ENSG00000167996	ENSG00000167996	ENSG00000244734	ENSG00000182774	ENSG00000244734	ENSG00000196154	ENSG00000211592	ENSG00000211592	ENSG00000244734	ENSG00000211592	ENSG00000211592
ENSG00000100100	ENSG00000118503	ENSG00000213741	ENSG00000213741	ENSG00000100100	ENSG00000173812	ENSG00000169045	ENSG00000071082	ENSG00000071082	ENSG00000121966	ENSG00000182774	ENSG00000167996	ENSG00000244734	ENSG00000197728	ENSG00000132475	ENSG00000121966	ENSG00000171223	ENSG00000197728	ENSG00000197728	ENSG00000197728	ENSG00000182774	ENSG00000121966	ENSG00000121966	ENSG00000121966	ENSG00000184779	ENSG00000184779	ENSG00000182774	ENSG00000019582	ENSG00000197728	ENSG00000211679	ENSG00000197728	ENSG00000211679	ENSG00000173812
ENSG00000130522	ENSG00000100100	ENSG00000167526	ENSG00000167526	ENSG00000169045	ENSG00000197728	ENSG00000206503	ENSG00000198712	ENSG00000197756	ENSG00000133872	ENSG00000184779	ENSG00000173812	ENSG00000167996	ENSG00000211679	ENSG00000211679	ENSG00000118503	ENSG00000121966	ENSG00000188536	ENSG00000188536	ENSG00000188536	ENSG00000184779	ENSG00000197728	ENSG00000118503	ENSG00000197728	ENSG00000197728	ENSG00000197728	ENSG00000184779	ENSG00000211679	ENSG00000211679	ENSG00000211675	ENSG00000188536	ENSG00000211677	ENSG00000171223
ENSG00000104660	ENSG00000169045	ENSG00000071082	ENSG00000133112	ENSG00000130522	ENSG00000188536	ENSG00000215030	ENSG00000112306	ENSG00000198918	ENSG00000133639	ENSG00000167996	ENSG00000171223	ENSG00000173812	ENSG00000105374	ENSG00000105374	ENSG00000204525	ENSG00000127528	ENSG00000206172	ENSG00000206172	ENSG00000206172	ENSG00000197728	ENSG00000234745	ENSG00000169045	ENSG00000234745	ENSG00000122026	ENSG00000234745	ENSG00000197728	ENSG00000105374	ENSG00000105374	ENSG00000132465	ENSG00000206172	ENSG00000211675	ENSG00000132475
ENSG00000228830	ENSG00000130522	ENSG00000205542	ENSG00000071082	ENSG00000168066	ENSG00000206172	ENSG00000211899	ENSG00000149273	ENSG00000186468	ENSG00000118503	ENSG00000173812	ENSG00000121966	ENSG00000197728	ENSG00000211677	ENSG00000211677	ENSG00000169045	ENSG00000118503	ENSG00000118503	ENSG00000105374	ENSG00000105374	ENSG00000234745	ENSG00000118503	ENSG00000130522	ENSG00000118503	ENSG00000234745	ENSG00000239839	ENSG00000234745	ENSG00000185201	ENSG00000211675	ENSG00000115523	ENSG00000203875	ENSG00000239951	ENSG00000121966
ENSG00000215030	ENSG00000206503	ENSG00000198712	ENSG00000142541	ENSG00000104660	ENSG00000266751	ENSG00000065357	ENSG00000229117	ENSG00000198840	ENSG00000122862	ENSG00000133872	ENSG00000197728	ENSG00000188536	ENSG00000211675	ENSG00000211675	ENSG00000130522	ENSG00000266751	ENSG00000266751	ENSG00000115523	ENSG00000115523	ENSG00000188536	ENSG00000122862	ENSG00000206503	ENSG00000122862	ENSG00000188536	ENSG00000238103	ENSG00000188536	ENSG00000211675	ENSG00000132465	ENSG00000239951	ENSG00000197746	ENSG00000211666	ENSG00000237973
ENSG00000132002	ENSG00000168066	ENSG00000112306	ENSG00000205542	ENSG00000228830	ENSG00000100100	ENSG00000068831	ENSG00000197756	ENSG00000143947	ENSG00000266751	ENSG00000197728	ENSG00000127528	ENSG00000127528	ENSG00000118503	ENSG00000118503	ENSG00000206503	ENSG00000100100	ENSG00000130522	ENSG00000104660	ENSG00000104660	ENSG00000206172	ENSG00000100100	ENSG00000215030	ENSG00000100100	ENSG00000206172	ENSG00000059804	ENSG00000206172	ENSG00000132465	ENSG00000115523	ENSG00000211666	ENSG00000163131	ENSG00000172183	ENSG00000196154
ENSG00000150593	ENSG00000104660	ENSG00000149273	ENSG00000198712	ENSG00000132002	ENSG00000169045	ENSG00000167978	ENSG00000142534	ENSG00000142676	ENSG00000100100	ENSG00000188536	ENSG00000211677	ENSG00000211679	ENSG00000132465	ENSG00000132465	ENSG00000215030	ENSG00000169045	ENSG00000104660	ENSG00000132002	ENSG00000132002	ENSG00000122862	ENSG00000204525	ENSG00000126353	ENSG00000204525	ENSG00000122862	ENSG00000203747	ENSG00000239839	ENSG00000160932	ENSG00000239951	ENSG00000197746	ENSG00000230202	ENSG00000215030	ENSG00000197728
ENSG00000126353	ENSG00000228830	ENSG00000229117	ENSG00000112306	ENSG00000126353	ENSG00000130522	ENSG00000136997	ENSG00000198918	ENSG00000134419	ENSG00000107742	ENSG00000206172	ENSG00000211675	ENSG00000211677	ENSG00000115523	ENSG00000115523	ENSG00000126353	ENSG00000130522	ENSG00000228830	ENSG00000189067	ENSG00000189067	ENSG00000204525	ENSG00000169045	ENSG00000128016	ENSG00000169045	ENSG00000204525	ENSG00000266192	ENSG00000126353	ENSG00000239951	ENSG00000211666	ENSG00000163131	ENSG00000170989	ENSG00000211450	ENSG00000019582
ENSG00000128016	ENSG00000215030	ENSG00000197756	ENSG00000149273	ENSG00000128016	ENSG00000168066	ENSG00000127824	ENSG00000108298	ENSG00000109475	ENSG00000169045	ENSG00000152518	ENSG00000118503	ENSG00000211675	ENSG00000239951	ENSG00000239951	ENSG00000128016	ENSG00000206503	ENSG00000215030	ENSG00000158050	ENSG00000158050	ENSG00000239839	ENSG00000130522	ENSG00000211591	ENSG00000130522	ENSG00000239839	ENSG00000264462	ENSG00000142089	ENSG00000211666	ENSG00000197746	ENSG00000126709	ENSG00000119801	ENSG00000187608	ENSG00000225630
ENSG00000211899	ENSG00000126353	ENSG00000137154	ENSG00000229117	ENSG00000065357	ENSG00000104660	ENSG00000090104	ENSG00000186468	ENSG00000156482	ENSG00000130522	ENSG00000133639	ENSG00000132465	ENSG00000152518	ENSG00000211666	ENSG00000211666	ENSG00000211899	ENSG00000168066	ENSG00000132002	ENSG00000132819	ENSG00000132819	ENSG00000126353	ENSG00000168066	ENSG00000211899	ENSG00000168066	ENSG00000126353	ENSG00000112096	ENSG00000059804	ENSG00000175567	ENSG00000215030	ENSG00000211899	ENSG00000142089	ENSG00000211591	ENSG00000188536
ENSG00000132819	ENSG00000128016	ENSG00000142534	ENSG00000197756	ENSG00000132819	ENSG00000228830	ENSG00000264462	ENSG00000198840	ENSG00000145592	ENSG00000168066	ENSG00000122862	ENSG00000266751	ENSG00000132465	ENSG00000103187	ENSG00000100906	ENSG00000132819	ENSG00000104660	ENSG00000150593	ENSG00000100450	ENSG00000100450	ENSG00000230903	ENSG00000104660	ENSG00000158050	ENSG00000104660	ENSG00000214389	ENSG00000186854	ENSG00000203747	ENSG00000103187	ENSG00000163131	ENSG00000211653	ENSG00000092820	ENSG00000211899	ENSG00000211679
ENSG00000110448	ENSG00000065357	ENSG00000198918	ENSG00000137154	ENSG00000068831	ENSG00000215030	ENSG00000105643	ENSG00000143947	ENSG00000008988	ENSG00000104660	ENSG00000266751	ENSG00000211666	ENSG00000099622	ENSG00000100906	ENSG00000166794	ENSG00000068831	ENSG00000228830	ENSG00000189067	ENSG00000077984	ENSG00000077984	ENSG00000119801	ENSG00000228830	ENSG00000132819	ENSG00000228830	ENSG00000230903	ENSG00000011600	ENSG00000264462	ENSG00000100911	ENSG00000211899	ENSG00000100450	ENSG00000145675	ENSG00000211653	ENSG00000105374
ENSG00000131051	ENSG00000132819	ENSG00000108298	ENSG00000142534	ENSG00000131051	ENSG00000132002	ENSG00000140853	ENSG00000142676	ENSG00000171858	ENSG00000228830	ENSG00000100100	ENSG00000169045	ENSG00000266751	ENSG00000206503	ENSG00000113387	ENSG00000131051	ENSG00000215030	ENSG00000126353	ENSG00000145649	ENSG00000145649	ENSG00000145675	ENSG00000215030	ENSG00000110448	ENSG00000215030	ENSG00000119801	ENSG00000158869	ENSG00000112096	ENSG00000197746	ENSG00000211653	ENSG00000145649	ENSG00000179144	ENSG00000251546	ENSG00000211677
ENSG00000170989	ENSG00000068831	ENSG00000186468	ENSG00000198918	ENSG00000170989	ENSG00000126353	ENSG00000265150	ENSG00000134419	ENSG00000105193	ENSG00000215030	ENSG00000107742	ENSG00000130522	ENSG00000026508	ENSG00000197746	ENSG00000206503	ENSG00000092820	ENSG00000126353	ENSG00000128016	ENSG00000170989	ENSG00000170989	ENSG00000059804	ENSG00000150593	ENSG00000131051	ENSG00000132002	ENSG00000145675	ENSG00000163220	ENSG00000137575	ENSG00000172543	ENSG00000100450	ENSG00000100097	ENSG00000059804	ENSG00000165949	ENSG00000211675
ENSG00000119801	ENSG00000110448	ENSG00000198840	ENSG00000108298	ENSG00000119801	ENSG00000128016	ENSG00000124181	ENSG00000109475	ENSG00000144713	ENSG00000132002	ENSG00000169045	ENSG00000206503	ENSG00000211666	ENSG00000228830	ENSG00000228830	ENSG00000269926	ENSG00000128016	ENSG00000158050	ENSG00000119801	ENSG00000119801	ENSG00000187764	ENSG00000126353	ENSG00000170989	ENSG00000150593	ENSG00000238103	ENSG00000134352	ENSG00000011600	ENSG00000163131	ENSG00000145649	ENSG00000211949	ENSG00000203747	ENSG00000242371	ENSG00000152518
ENSG00000092820	ENSG00000131051	ENSG00000143947	ENSG00000186468	ENSG00000092820	ENSG00000065357	ENSG00000116741	ENSG00000156482	ENSG00000138326	ENSG00000150593	ENSG00000130522	ENSG00000168066	ENSG00000100906	ENSG00000215030	ENSG00000215030	ENSG00000167978	ENSG00000211899	ENSG00000132819	ENSG00000092820	ENSG00000092820	ENSG00000138757	ENSG00000128016	ENSG00000119801	ENSG00000126353	ENSG00000059804	ENSG00000179094	ENSG00000158869	ENSG00000187608	ENSG00000100097	ENSG00000163191	ENSG00000264462	ENSG00000211949	ENSG00000203875
ENSG00000111276	ENSG00000170989	ENSG00000142676	ENSG00000198840	ENSG00000167978	ENSG00000132819	ENSG00000099797	ENSG00000145592	ENSG00000105640	ENSG00000188042	ENSG00000269893	ENSG00000104660	ENSG00000169045	ENSG00000132002	ENSG00000132002	ENSG00000184557	ENSG00000065357	ENSG00000159388	ENSG00000145675	ENSG00000145675	ENSG00000105643	ENSG00000065357	ENSG00000092820	ENSG00000128016	ENSG00000111897	ENSG00000130844	ENSG00000163220	ENSG00000126709	ENSG00000230202	ENSG00000211598	ENSG00000028137	ENSG00000243466	ENSG00000133639
ENSG00000116560	ENSG00000119801	ENSG00000134419	ENSG00000143947	ENSG00000115524	ENSG00000110448	ENSG00000100201	ENSG00000008988	ENSG00000161016	ENSG00000168421	ENSG00000168066	ENSG00000228830	ENSG00000130522	ENSG00000163131	ENSG00000166598	ENSG00000059804	ENSG00000132819	ENSG00000110448	ENSG00000071073	ENSG00000071073	ENSG00000137575	ENSG00000132819	ENSG00000167978	ENSG00000084070	ENSG00000138757	ENSG00000153234	ENSG00000095794	ENSG00000211591	ENSG00000242371	ENSG00000142089	ENSG00000111897	ENSG00000173113	ENSG00000118503
ENSG00000145675	ENSG00000092820	ENSG00000109475	ENSG00000142676	ENSG00000167895	ENSG00000131051	ENSG00000179094	ENSG00000171858	ENSG00000172809	ENSG00000126353	ENSG00000104660	ENSG00000215030	ENSG00000206503	ENSG00000166598	ENSG00000128016	ENSG00000127824	ENSG00000068831	ENSG00000170989	ENSG00000211747	ENSG00000211747	ENSG00000196843	ENSG00000068831	ENSG00000184557	ENSG00000108669	ENSG00000105643	ENSG00000196126	ENSG00000130844	ENSG00000211899	ENSG00000211949	ENSG00000182718	ENSG00000138757	ENSG00000211598	ENSG00000132465
ENSG00000059804	ENSG00000167978	ENSG00000156482	ENSG00000100316	ENSG00000116560	ENSG00000170989	ENSG00000130844	ENSG00000105193	ENSG00000166441	ENSG00000128016	ENSG00000228830	ENSG00000132002	ENSG00000168066	ENSG00000128016	ENSG00000211899	ENSG00000113013	ENSG00000110448	ENSG00000119801	ENSG00000059804	ENSG00000059804	ENSG00000023445	ENSG00000110448	ENSG00000115875	ENSG00000132819	ENSG00000237550	ENSG00000114861	ENSG00000115687	ENSG00000211653	ENSG00000243466	ENSG00000150093	ENSG00000105643	ENSG00000211644	ENSG00000225972
ENSG00000127824	ENSG00000115875	ENSG00000145592	ENSG00000134419	ENSG00000145675	ENSG00000119801	ENSG00000144028	ENSG00000144713	ENSG00000131469	ENSG00000065357	ENSG00000215030	ENSG00000126353	ENSG00000104660	ENSG00000211899	ENSG00000164104	ENSG00000169508	ENSG00000131051	ENSG00000092820	ENSG00000111897	ENSG00000111897	ENSG00000163220	ENSG00000131051	ENSG00000145675	ENSG00000159388	ENSG00000162430	ENSG00000135821	ENSG00000153234	ENSG00000100450	ENSG00000211598	ENSG00000211644	ENSG00000162430	ENSG00000241351	ENSG00000266751
ENSG00000113013	ENSG00000116560	ENSG00000008988	ENSG00000109475	ENSG00000059804	ENSG00000092820	ENSG00000184588	ENSG00000140988	ENSG00000164587	ENSG00000108669	ENSG00000132002	ENSG00000128016	ENSG00000228830	ENSG00000164104	ENSG00000211653	ENSG00000090104	ENSG00000170989	ENSG00000111276	ENSG00000138757	ENSG00000138757	ENSG00000100201	ENSG00000170989	ENSG00000059804	ENSG00000110448	ENSG00000137575	ENSG00000133226	ENSG00000075426	ENSG00000077984	ENSG00000142089	ENSG00000168961	ENSG00000111796	ENSG00000211659	ENSG00000115523
ENSG00000169508	ENSG00000145675	ENSG00000174444	ENSG00000156482	ENSG00000113013	ENSG00000111276	ENSG00000262246	ENSG00000105640	ENSG00000063177	ENSG00000132819	ENSG00000150593	ENSG00000211899	ENSG00000215030	ENSG00000211653	ENSG00000158050	ENSG00000168209	ENSG00000119801	ENSG00000215301	ENSG00000105643	ENSG00000105643	ENSG00000179094	ENSG00000119801	ENSG00000127824	ENSG00000131051	ENSG00000196843	ENSG00000197249	ENSG00000138767	ENSG00000145649	ENSG00000182718	ENSG00000211659	ENSG00000112096	ENSG00000244437	ENSG00000239951
ENSG00000090104	ENSG00000059804	ENSG00000171858	ENSG00000145592	ENSG00000169508	ENSG00000167978	ENSG00000201778	ENSG00000161016	ENSG00000125691	ENSG00000230903	ENSG00000188042	ENSG00000065357	ENSG00000132002	ENSG00000158050	ENSG00000132819	ENSG00000161547	ENSG00000092820	ENSG00000145675	ENSG00000120690	ENSG00000120690	ENSG00000110367	ENSG00000092820	ENSG00000113013	ENSG00000170989	ENSG00000023445	ENSG00000164821	ENSG00000216490	ENSG00000100097	ENSG00000150093	ENSG00000180644	ENSG00000137575	ENSG00000211663	ENSG00000211666
ENSG00000013441	ENSG00000127824	ENSG00000145425	ENSG00000008988	ENSG00000090104	ENSG00000215301	ENSG00000153234	ENSG00000172809	ENSG00000197958	ENSG00000068831	ENSG00000168421	ENSG00000158050	ENSG00000189067	ENSG00000132819	ENSG00000100450	ENSG00000167106	ENSG00000269926	ENSG00000211747	ENSG00000113088	ENSG00000113088	ENSG00000095794	ENSG00000111276	ENSG00000169508	ENSG00000119801	ENSG00000163513	ENSG00000111011	ENSG00000196126	ENSG00000165949	ENSG00000211644	ENSG00000130066	ENSG00000196843	ENSG00000211651	ENSG00000100906
ENSG00000111897	ENSG00000113013	ENSG00000105193	ENSG00000174444	ENSG00000161547	ENSG00000115875	ENSG00000182087	ENSG00000166441	ENSG00000177600	ENSG00000110448	ENSG00000126353	ENSG00000132819	ENSG00000128016	ENSG00000100450	ENSG00000251546	ENSG00000013441	ENSG00000167978	ENSG00000059804	ENSG00000137441	ENSG00000137441	ENSG00000130844	ENSG00000167978	ENSG00000090104	ENSG00000092820	ENSG00000163220	ENSG00000100599	ENSG00000213639	ENSG00000211949	ENSG00000125347	ENSG00000203747	ENSG00000109787	ENSG00000173272	ENSG00000204525
ENSG00000138757	ENSG00000169508	ENSG00000144713	ENSG00000171858	ENSG00000255717	ENSG00000116560	ENSG00000204642	ENSG00000131469	ENSG00000147604	ENSG00000131051	ENSG00000128016	ENSG00000159388	ENSG00000164104	ENSG00000251546	ENSG00000077984	ENSG00000105643	ENSG00000184557	ENSG00000113013	ENSG00000137575	ENSG00000137575	ENSG00000115687	ENSG00000167895	ENSG00000167106	ENSG00000111276	ENSG00000179094	ENSG00000143546	ENSG00000135821	ENSG00000115415	ENSG00000241351	ENSG00000211651	ENSG00000011600	ENSG00000211660	ENSG00000130522
ENSG00000105643	ENSG00000090104	ENSG00000140988	ENSG00000145425	ENSG00000013441	ENSG00000145675	ENSG00000116754	ENSG00000164587	ENSG00000163682	ENSG00000170989	ENSG00000065357	ENSG00000068831	ENSG00000211653	ENSG00000077984	ENSG00000145649	ENSG00000272256	ENSG00000115875	ENSG00000169508	ENSG00000196843	ENSG00000196843	ENSG00000153234	ENSG00000116560	ENSG00000013441	ENSG00000167978	ENSG00000110367	ENSG00000072110	ENSG00000197249	ENSG00000163191	ENSG00000211659	ENSG00000264462	ENSG00000158869	ENSG00000013441	ENSG00000228830
ENSG00000119048	ENSG00000161547	ENSG00000198763	ENSG00000105193	ENSG00000111897	ENSG00000071073	ENSG00000196126	ENSG00000063177	ENSG00000124614	ENSG00000119801	ENSG00000132819	ENSG00000013725	ENSG00000158050	ENSG00000145649	ENSG00000100097	ENSG00000163660	ENSG00000116560	ENSG00000090104	ENSG00000109787	ENSG00000109787	ENSG00000075426	ENSG00000145675	ENSG00000158717	ENSG00000215301	ENSG00000095794	ENSG00000069399	ENSG00000164821	ENSG00000142089	ENSG00000180644	ENSG00000028137	ENSG00000179094	ENSG00000211668	ENSG00000172543
ENSG00000100664	ENSG00000255717	ENSG00000138326	ENSG00000147403	ENSG00000138757	ENSG00000059804	ENSG00000087087	ENSG00000125691	ENSG00000265681	ENSG00000092820	ENSG00000230903	ENSG00000243466	ENSG00000132819	ENSG00000100097	ENSG00000078304	ENSG00000196843	ENSG00000145675	ENSG00000111897	ENSG00000168175	ENSG00000168175	ENSG00000138767	ENSG00000059804	ENSG00000105643	ENSG00000116560	ENSG00000130844	ENSG00000197561	ENSG00000143546	ENSG00000182718	ENSG00000130066	ENSG00000211668	ENSG00000110367	ENSG00000239264	ENSG00000239839
ENSG00000137575	ENSG00000013441	ENSG00000105640	ENSG00000144713	ENSG00000105643	ENSG00000266192	ENSG00000198408	ENSG00000177600	ENSG00000161970	ENSG00000111276	ENSG00000110448	ENSG00000110448	ENSG00000128272	ENSG00000242371	ENSG00000115738	ENSG00000171608	ENSG00000059804	ENSG00000138757	ENSG00000023445	ENSG00000023445	ENSG00000105856	ENSG00000127824	ENSG00000161011	ENSG00000145675	ENSG00000115687	ENSG00000198502	ENSG00000072110	ENSG00000150093	ENSG00000203747	ENSG00000123416	ENSG00000095794	ENSG00000211648	ENSG00000168421
ENSG00000163660	ENSG00000138757	ENSG00000108107	ENSG00000140988	ENSG00000100664	ENSG00000113013	ENSG00000146083	ENSG00000147604	ENSG00000204628	ENSG00000167978	ENSG00000131051	ENSG00000131051	ENSG00000112081	ENSG00000159388	ENSG00000242371	ENSG00000124181	ENSG00000127824	ENSG00000105643	ENSG00000105993	ENSG00000105993	ENSG00000127152	ENSG00000113013	ENSG00000272256	ENSG00000059804	ENSG00000153234	ENSG00000107485	ENSG00000176845	ENSG00000211644	ENSG00000211651	ENSG00000239264	ENSG00000130844	ENSG00000137959	ENSG00000128016
ENSG00000196843	ENSG00000158717	ENSG00000161016	ENSG00000198763	ENSG00000140853	ENSG00000169508	ENSG00000182179	ENSG00000142937	ENSG00000198755	ENSG00000215301	ENSG00000170989	ENSG00000076928	ENSG00000159388	ENSG00000211949	ENSG00000159388	ENSG00000147457	ENSG00000113013	ENSG00000120690	ENSG00000166848	ENSG00000166848	ENSG00000213639	ENSG00000169508	ENSG00000100664	ENSG00000127824	ENSG00000075426	ENSG00000202538	ENSG00000116044	ENSG00000168961	ENSG00000264462	ENSG00000211648	ENSG00000140105	ENSG00000211673	ENSG00000211591
ENSG00000099860	ENSG00000105643	ENSG00000172809	ENSG00000138326	ENSG00000137575	ENSG00000090104	ENSG00000141551	ENSG00000198034	ENSG00000182899	ENSG00000115875	ENSG00000119801	ENSG00000170989	ENSG00000243466	ENSG00000243466	ENSG00000211949	ENSG00000116741	ENSG00000169508	ENSG00000119048	ENSG00000126524	ENSG00000126524	ENSG00000099331	ENSG00000187764	ENSG00000163660	ENSG00000113013	ENSG00000138767	ENSG00000101439	ENSG00000197561	ENSG00000211659	ENSG00000028137	ENSG00000142634	ENSG00000115687	ENSG00000242534	ENSG00000211899
ENSG00000171608	ENSG00000100664	ENSG00000034510	ENSG00000105640	ENSG00000170004	ENSG00000161547	ENSG00000100813	ENSG00000163682	ENSG00000162244	ENSG00000167895	ENSG00000092820	ENSG00000211598	ENSG00000110448	ENSG00000211598	ENSG00000243466	ENSG00000100796	ENSG00000090104	ENSG00000100664	ENSG00000198355	ENSG00000198355	ENSG00000166669	ENSG00000090104	ENSG00000196843	ENSG00000169508	ENSG00000204642	ENSG00000115306	ENSG00000159674	ENSG00000180644	ENSG00000211668	ENSG00000137441	ENSG00000153234	ENSG00000254709	ENSG00000164104
ENSG00000134758	ENSG00000140853	ENSG00000166441	ENSG00000161016	ENSG00000163660	ENSG00000255717	ENSG00000003756	ENSG00000168028	ENSG00000130255	ENSG00000116560	ENSG00000111276	ENSG00000119801	ENSG00000131051	ENSG00000005844	ENSG00000131051	ENSG00000100221	ENSG00000168209	ENSG00000137575	ENSG00000113811	ENSG00000113811	ENSG00000164821	ENSG00000161547	ENSG00000099860	ENSG00000187764	ENSG00000105856	ENSG00000204287	ENSG00000198502	ENSG00000130066	ENSG00000123416	ENSG00000211673	ENSG00000075426	ENSG00000163660	ENSG00000211653
ENSG00000116741	ENSG00000137575	ENSG00000131469	ENSG00000172809	ENSG00000196843	ENSG00000013441	ENSG00000215788	ENSG00000124614	ENSG00000136942	ENSG00000145675	ENSG00000167978	ENSG00000092820	ENSG00000076928	ENSG00000119801	ENSG00000211598	ENSG00000171522	ENSG00000161547	ENSG00000113575	ENSG00000100221	ENSG00000100221	ENSG00000143546	ENSG00000255717	ENSG00000171608	ENSG00000090104	ENSG00000127152	ENSG00000113448	ENSG00000155307	ENSG00000156587	ENSG00000239264	ENSG00000242534	ENSG00000138767	ENSG00000265150	ENSG00000158050
ENSG00000198355	ENSG00000163660	ENSG00000164587	ENSG00000034510	ENSG00000109787	ENSG00000111897	ENSG00000114737	ENSG00000265681	ENSG00000115268	ENSG00000059804	ENSG00000215301	ENSG00000111276	ENSG00000170989	ENSG00000142089	ENSG00000005844	ENSG00000124193	ENSG00000255717	ENSG00000196843	ENSG00000179094	ENSG00000179094	ENSG00000178971	ENSG00000013441	ENSG00000116741	ENSG00000161547	ENSG00000213639	ENSG00000005339	ENSG00000202538	ENSG00000130303	ENSG00000211648	ENSG00000254709	ENSG00000155366	ENSG00000127922	ENSG00000110848
ENSG00000113811	ENSG00000196843	ENSG00000063177	ENSG00000166441	ENSG00000137497	ENSG00000138757	ENSG00000109920	ENSG00000161970	ENSG00000110700	ENSG00000127824	ENSG00000116560	ENSG00000125347	ENSG00000211598	ENSG00000182718	ENSG00000119801	ENSG00000179094	ENSG00000167106	ENSG00000109787	ENSG00000110367	ENSG00000110367	ENSG00000234617	ENSG00000111897	ENSG00000198355	ENSG00000255717	ENSG00000131669	ENSG00000173846	ENSG00000101439	ENSG00000203747	ENSG00000142634	ENSG00000125148	ENSG00000178562	ENSG00000211662	ENSG00000132819
ENSG00000100221	ENSG00000099860	ENSG00000125691	ENSG00000131469	ENSG00000168175	ENSG00000105643	ENSG00000104880	ENSG00000204628	ENSG00000198888	ENSG00000266192	ENSG00000145675	ENSG00000167978	ENSG00000119801	ENSG00000150093	ENSG00000182718	ENSG00000130844	ENSG00000013441	ENSG00000146457	ENSG00000095794	ENSG00000095794	ENSG00000142102	ENSG00000138757	ENSG00000113811	ENSG00000167106	ENSG00000166669	ENSG00000105205	ENSG00000204287	ENSG00000211651	ENSG00000137441	ENSG00000100453	ENSG00000102265	ENSG00000125995	ENSG00000100450
ENSG00000171522	ENSG00000171608	ENSG00000197958	ENSG00000164587	ENSG00000023445	ENSG00000120690	ENSG00000110719	ENSG00000089157	ENSG00000122406	ENSG00000113013	ENSG00000071073	ENSG00000020633	ENSG00000092820	ENSG00000211644	ENSG00000150093	ENSG00000144028	ENSG00000158717	ENSG00000168175	ENSG00000130844	ENSG00000130844	ENSG00000069399	ENSG00000158717	ENSG00000099797	ENSG00000013441	ENSG00000164821	ENSG00000179344	ENSG00000105835	ENSG00000264462	ENSG00000211673	ENSG00000100385	ENSG00000216490	ENSG00000211671	ENSG00000077984
ENSG00000124193	ENSG00000124181	ENSG00000137818	ENSG00000063177	ENSG00000104852	ENSG00000119048	ENSG00000072110	ENSG00000198727	ENSG00000211592	ENSG00000169508	ENSG00000238103	ENSG00000115524	ENSG00000111276	ENSG00000125347	ENSG00000211644	ENSG00000186174	ENSG00000105643	ENSG00000105993	ENSG00000112245	ENSG00000112245	ENSG00000176845	ENSG00000105643	ENSG00000100221	ENSG00000111897	ENSG00000143546	ENSG00000254087	ENSG00000113448	ENSG00000028137	ENSG00000242534	ENSG00000265150	ENSG00000196126	ENSG00000170345	ENSG00000145649
ENSG00000179094	ENSG00000116741	ENSG00000177600	ENSG00000125691	ENSG00000099860	ENSG00000089737	ENSG00000133316	ENSG00000198695	ENSG00000089009	ENSG00000187764	ENSG00000059804	ENSG00000184557	ENSG00000211644	ENSG00000167978	ENSG00000125347	ENSG00000184588	ENSG00000272256	ENSG00000163513	ENSG00000115687	ENSG00000115687	ENSG00000116044	ENSG00000119048	ENSG00000171522	ENSG00000138757	ENSG00000234617	ENSG00000090382	ENSG00000179344	ENSG00000123416	ENSG00000254709	ENSG00000011600	ENSG00000105856	ENSG00000241755	ENSG00000230903
ENSG00000110367	ENSG00000198355	ENSG00000147604	ENSG00000197958	ENSG00000171608	ENSG00000100664	ENSG00000102760	ENSG00000198755	ENSG00000149806	ENSG00000182568	ENSG00000127824	ENSG00000177105	ENSG00000125347	ENSG00000044574	ENSG00000167978	ENSG00000262246	ENSG00000100664	ENSG00000099860	ENSG00000153234	ENSG00000153234	ENSG00000100644	ENSG00000100664	ENSG00000124193	ENSG00000105643	ENSG00000132823	ENSG00000162496	ENSG00000254087	ENSG00000157601	ENSG00000125148	ENSG00000158869	ENSG00000213639	ENSG00000201778	ENSG00000100097
ENSG00000095794	ENSG00000113811	ENSG00000142937	ENSG00000137818	ENSG00000124181	ENSG00000140853	ENSG00000178971	ENSG00000182899	ENSG00000244734	ENSG00000090104	ENSG00000266192	ENSG00000115875	ENSG00000167978	ENSG00000241351	ENSG00000044574	ENSG00000201778	ENSG00000137575	ENSG00000134758	ENSG00000140743	ENSG00000140743	ENSG00000177426	ENSG00000140853	ENSG00000179094	ENSG00000161011	ENSG00000069399	ENSG00000255198	ENSG00000090382	ENSG00000239264	ENSG00000100453	ENSG00000211671	ENSG00000146425	ENSG00000254911	ENSG00000159388
ENSG00000173039	ENSG00000100221	ENSG00000198034	ENSG00000147604	ENSG00000126524	ENSG00000137575	ENSG00000142102	ENSG00000162244	ENSG00000171863	ENSG00000161547	ENSG00000113013	ENSG00000167895	ENSG00000020633	ENSG00000184557	ENSG00000241351	ENSG00000153234	ENSG00000163660	ENSG00000126524	ENSG00000120063	ENSG00000120063	ENSG00000197561	ENSG00000112096	ENSG00000095794	ENSG00000120690	ENSG00000176845	ENSG00000154027	ENSG00000149212	ENSG00000211648	ENSG00000100385	ENSG00000164733	ENSG00000131669	ENSG00000243290	ENSG00000211949
ENSG00000130844	ENSG00000171522	ENSG00000163682	ENSG00000142937	ENSG00000116741	ENSG00000170004	ENSG00000176845	ENSG00000130255	ENSG00000114391	ENSG00000255717	ENSG00000169508	ENSG00000116560	ENSG00000136527	ENSG00000177105	ENSG00000184557	ENSG00000182087	ENSG00000196843	ENSG00000116741	ENSG00000075426	ENSG00000075426	ENSG00000271581	ENSG00000137575	ENSG00000173039	ENSG00000119048	ENSG00000116044	ENSG00000161835	ENSG00000168329	ENSG00000142634	ENSG00000265150	ENSG00000132530	ENSG00000197249	ENSG00000211640	ENSG00000243466
ENSG00000112245	ENSG00000124193	ENSG00000168028	ENSG00000198034	ENSG00000198355	ENSG00000163660	ENSG00000155926	ENSG00000136942	ENSG00000083845	ENSG00000167106	ENSG00000182568	ENSG00000145675	ENSG00000115524	ENSG00000115875	ENSG00000184897	ENSG00000075426	ENSG00000099860	ENSG00000198355	ENSG00000138767	ENSG00000138767	ENSG00000155307	ENSG00000163660	ENSG00000130844	ENSG00000272256	ENSG00000100644	ENSG00000149212	ENSG00000172232	ENSG00000113088	ENSG00000011600	ENSG00000140105	ENSG00000242114	ENSG00000177606	ENSG00000120129
ENSG00000115687	ENSG00000179094	ENSG00000198242	ENSG00000163682	ENSG00000113811	ENSG00000196843	ENSG00000139636	ENSG00000115268	ENSG00000182774	ENSG00000013441	ENSG00000090104	ENSG00000211659	ENSG00000184557	ENSG00000145675	ENSG00000115875	ENSG00000177606	ENSG00000171608	ENSG00000113811	ENSG00000178562	ENSG00000178562	ENSG00000005812	ENSG00000196843	ENSG00000186174	ENSG00000100664	ENSG00000177426	ENSG00000174738	ENSG00000129226	ENSG00000137441	ENSG00000158869	ENSG00000254911	ENSG00000078589	ENSG00000204642	ENSG00000211598
ENSG00000186174	ENSG00000110367	ENSG00000124614	ENSG00000168028	ENSG00000134352	ENSG00000109787	ENSG00000140983	ENSG00000196531	ENSG00000184779	ENSG00000111897	ENSG00000161547	ENSG00000071073	ENSG00000215301	ENSG00000211659	ENSG00000145675	ENSG00000204642	ENSG00000124181	ENSG00000185115	ENSG00000105856	ENSG00000105856	ENSG00000127603	ENSG00000109787	ENSG00000184588	ENSG00000112096	ENSG00000197561	ENSG00000168329	ENSG00000027697	ENSG00000162645	ENSG00000211671	ENSG00000243290	ENSG00000068697	ENSG00000240382	ENSG00000119801
ENSG00000184588	ENSG00000095794	ENSG00000265681	ENSG00000198242	ENSG00000100221	ENSG00000137497	ENSG00000252061	ENSG00000110700	ENSG00000233927	ENSG00000138757	ENSG00000255717	ENSG00000211747	ENSG00000220205	ENSG00000244437	ENSG00000211659	ENSG00000116754	ENSG00000134758	ENSG00000100221	ENSG00000213639	ENSG00000213639	ENSG00000147162	ENSG00000137497	ENSG00000262246	ENSG00000137575	ENSG00000271581	ENSG00000172232	ENSG00000221743	ENSG00000211673	ENSG00000164733	ENSG00000211640	ENSG00000025708	ENSG00000243238	ENSG00000198843
ENSG00000262246	ENSG00000173039	ENSG00000161970	ENSG00000124614	ENSG00000171522	ENSG00000143772	ENSG00000154832	ENSG00000198888	ENSG00000116251	ENSG00000158717	ENSG00000013441	ENSG00000059804	ENSG00000177105	ENSG00000130066	ENSG00000244437	ENSG00000114861	ENSG00000116741	ENSG00000171522	ENSG00000146425	ENSG00000146425	ENSG00000091592	ENSG00000143772	ENSG00000201778	ENSG00000163660	ENSG00000155307	ENSG00000129226	ENSG00000066336	ENSG00000164111	ENSG00000140105	ENSG00000155366	ENSG00000139278	ENSG00000170476	ENSG00000269926
ENSG00000201778	ENSG00000130844	ENSG00000204628	ENSG00000265681	ENSG00000029363	ENSG00000168175	ENSG00000248333	ENSG00000122406	ENSG00000181163	ENSG00000105643	ENSG00000111897	ENSG00000127824	ENSG00000179010	ENSG00000211663	ENSG00000130066	ENSG00000131408	ENSG00000198355	ENSG00000179094	ENSG00000131669	ENSG00000131669	ENSG00000204287	ENSG00000023445	ENSG00000153234	ENSG00000196843	ENSG00000005812	ENSG00000138449	ENSG00000100448	ENSG00000242534	ENSG00000254911	ENSG00000240382	ENSG00000069399	ENSG00000244575	ENSG00000211644
ENSG00000153234	ENSG00000112245	ENSG00000089157	ENSG00000161970	ENSG00000100201	ENSG00000023445	ENSG00000144802	ENSG00000211592	ENSG00000167996	ENSG00000161011	ENSG00000224032	ENSG00000113013	ENSG00000115875	ENSG00000211747	ENSG00000211663	ENSG00000135821	ENSG00000113811	ENSG00000110367	ENSG00000063978	ENSG00000063978	ENSG00000117523	ENSG00000105993	ENSG00000182087	ENSG00000109787	ENSG00000204287	ENSG00000221743	ENSG00000257764	ENSG00000254709	ENSG00000243290	ENSG00000243238	ENSG00000176845	ENSG00000144655	ENSG00000125347
ENSG00000075426	ENSG00000115687	ENSG00000198727	ENSG00000204628	ENSG00000101109	ENSG00000105993	ENSG00000064012	ENSG00000188846	ENSG00000187514	ENSG00000237550	ENSG00000138757	ENSG00000169508	ENSG00000116560	ENSG00000059804	ENSG00000211747	ENSG00000162231	ENSG00000100796	ENSG00000095794	ENSG00000122085	ENSG00000122085	ENSG00000105835	ENSG00000163513	ENSG00000075426	ENSG00000143772	ENSG00000105835	ENSG00000066336	ENSG00000153922	ENSG00000125148	ENSG00000211640	ENSG00000216490	ENSG00000116044	ENSG00000211940	ENSG00000020633
ENSG00000177606	ENSG00000186174	ENSG00000198695	ENSG00000089157	ENSG00000124193	ENSG00000163513	ENSG00000174243	ENSG00000089009	ENSG00000087086	ENSG00000119048	ENSG00000158717	ENSG00000090104	ENSG00000145675	ENSG00000203747	ENSG00000059804	ENSG00000133226	ENSG00000100221	ENSG00000173039	ENSG00000067064	ENSG00000067064	ENSG00000113448	ENSG00000099860	ENSG00000177606	ENSG00000105993	ENSG00000113448	ENSG00000100448	ENSG00000109929	ENSG00000100453	ENSG00000155366	ENSG00000196126	ENSG00000100644	ENSG00000211625	ENSG00000241351
ENSG00000138767	ENSG00000184588	ENSG00000198755	ENSG00000198727	ENSG00000179094	ENSG00000099860	ENSG00000055483	ENSG00000149806	ENSG00000173812	ENSG00000272256	ENSG00000105643	ENSG00000108292	ENSG00000211659	ENSG00000169508	ENSG00000203747	ENSG00000144655	ENSG00000171522	ENSG00000130844	ENSG00000165943	ENSG00000165943	ENSG00000213221	ENSG00000171608	ENSG00000204642	ENSG00000163513	ENSG00000213221	ENSG00000257764	ENSG00000196415	ENSG00000100385	ENSG00000240382	ENSG00000170476	ENSG00000139722	ENSG00000007312	ENSG00000211659
ENSG00000204642	ENSG00000262246	ENSG00000254772	ENSG00000198695	ENSG00000110367	ENSG00000171608	ENSG00000196187	ENSG00000171863	ENSG00000174748	ENSG00000089737	ENSG00000161011	ENSG00000161547	ENSG00000071073	ENSG00000211651	ENSG00000169508	ENSG00000109118	ENSG00000124193	ENSG00000112245	ENSG00000166669	ENSG00000166669	ENSG00000173846	ENSG00000182149	ENSG00000116754	ENSG00000099860	ENSG00000090382	ENSG00000196415	ENSG00000183484	ENSG00000265150	ENSG00000243238	ENSG00000244575	ENSG00000159674	ENSG00000164308	ENSG00000180644
ENSG00000178562	ENSG00000201778	ENSG00000182899	ENSG00000198755	ENSG00000095794	ENSG00000124181	ENSG00000271581	ENSG00000114391	ENSG00000221983	ENSG00000100664	ENSG00000120690	ENSG00000255717	ENSG00000130066	ENSG00000090104	ENSG00000211651	ENSG00000067064	ENSG00000179094	ENSG00000115687	ENSG00000163788	ENSG00000163788	ENSG00000105639	ENSG00000124181	ENSG00000213639	ENSG00000171608	ENSG00000080371	ENSG00000156232	ENSG00000112297	ENSG00000011600	ENSG00000216490	ENSG00000135916	ENSG00000165732	ENSG00000074071	ENSG00000244437
ENSG00000105856	ENSG00000153234	ENSG00000162244	ENSG00000254772	ENSG00000130844	ENSG00000134758	ENSG00000198218	ENSG00000083845	ENSG00000104529	ENSG00000140853	ENSG00000237550	ENSG00000013441	ENSG00000211663	ENSG00000167552	ENSG00000237506	ENSG00000111011	ENSG00000110367	ENSG00000186174	ENSG00000242114	ENSG00000242114	ENSG00000221978	ENSG00000134758	ENSG00000198408	ENSG00000182149	ENSG00000131634	ENSG00000167851	ENSG00000167851	ENSG00000189159	ENSG00000196126	ENSG00000172936	ENSG00000111266	ENSG00000240864	ENSG00000211663
ENSG00000213639	ENSG00000182087	ENSG00000130255	ENSG00000182899	ENSG00000112245	ENSG00000126524	ENSG00000160633	ENSG00000198786	ENSG00000132475	ENSG00000137575	ENSG00000119048	ENSG00000111897	ENSG00000211747	ENSG00000211660	ENSG00000090104	ENSG00000141551	ENSG00000095794	ENSG00000184588	ENSG00000078589	ENSG00000078589	ENSG00000160796	ENSG00000116741	ENSG00000131408	ENSG00000134758	ENSG00000156804	ENSG00000113269	ENSG00000170525	ENSG00000158869	ENSG00000170476	ENSG00000197249	ENSG00000139112	ENSG00000114737	ENSG00000185883
ENSG00000114861	ENSG00000075426	ENSG00000136942	ENSG00000162244	ENSG00000213928	ENSG00000116741	ENSG00000198502	ENSG00000233927	ENSG00000114942	ENSG00000077238	ENSG00000272256	ENSG00000211668	ENSG00000059804	ENSG00000168003	ENSG00000211660	ENSG00000100813	ENSG00000173039	ENSG00000153234	ENSG00000100351	ENSG00000100351	ENSG00000090382	ENSG00000198355	ENSG00000133226	ENSG00000116741	ENSG00000162496	ENSG00000257923	ENSG00000158987	ENSG00000182054	ENSG00000244575	ENSG00000211625	ENSG00000198502	ENSG00000108515	ENSG00000169508
ENSG00000146425	ENSG00000177606	ENSG00000115268	ENSG00000130255	ENSG00000129824	ENSG00000198355	ENSG00000072310	ENSG00000116251	ENSG00000127184	ENSG00000170004	ENSG00000089737	ENSG00000138757	ENSG00000127824	ENSG00000028137	ENSG00000168003	ENSG00000204316	ENSG00000130844	ENSG00000140743	ENSG00000141582	ENSG00000141582	ENSG00000115548	ENSG00000113811	ENSG00000103342	ENSG00000198355	ENSG00000119950	ENSG00000126759	ENSG00000257923	ENSG00000204397	ENSG00000135916	ENSG00000142347	ENSG00000155307	ENSG00000254126	ENSG00000211651
ENSG00000198408	ENSG00000138767	ENSG00000196531	ENSG00000136942	ENSG00000115687	ENSG00000113811	ENSG00000140400	ENSG00000167996	ENSG00000145741	ENSG00000163660	ENSG00000100664	ENSG00000239264	ENSG00000266192	ENSG00000211668	ENSG00000028137	ENSG00000003756	ENSG00000112245	ENSG00000075426	ENSG00000234617	ENSG00000234617	ENSG00000198089	ENSG00000100796	ENSG00000144655	ENSG00000113811	ENSG00000161835	ENSG00000118482	ENSG00000126759	ENSG00000211671	ENSG00000172936	ENSG00000104763	ENSG00000005812	ENSG00000211945	ENSG00000099875
ENSG00000131408	ENSG00000204642	ENSG00000110700	ENSG00000115268	ENSG00000186174	ENSG00000134352	ENSG00000105397	ENSG00000187514	ENSG00000196154	ENSG00000186854	ENSG00000112096	ENSG00000115758	ENSG00000113013	ENSG00000123416	ENSG00000211668	ENSG00000215788	ENSG00000186174	ENSG00000138767	ENSG00000183508	ENSG00000183508	ENSG00000156804	ENSG00000100221	ENSG00000109118	ENSG00000100796	ENSG00000149212	ENSG00000053918	ENSG00000053918	ENSG00000125753	ENSG00000197249	ENSG00000111331	ENSG00000100422	ENSG00000144802	ENSG00000090104
ENSG00000133226	ENSG00000178562	ENSG00000198888	ENSG00000196531	ENSG00000184588	ENSG00000100796	ENSG00000147162	ENSG00000087086	ENSG00000133872	ENSG00000196843	ENSG00000137575	ENSG00000105643	ENSG00000169508	ENSG00000239264	ENSG00000123416	ENSG00000114737	ENSG00000184588	ENSG00000178562	ENSG00000132823	ENSG00000132823	ENSG00000162496	ENSG00000171522	ENSG00000067064	ENSG00000100221	ENSG00000101695	ENSG00000005381	ENSG00000005381	ENSG00000164733	ENSG00000211625	ENSG00000132646	ENSG00000101439	ENSG00000227766	ENSG00000264462
ENSG00000103342	ENSG00000116754	ENSG00000075624	ENSG00000110700	ENSG00000262246	ENSG00000100221	ENSG00000091592	ENSG00000173812	ENSG00000197728	ENSG00000109787	ENSG00000077238	ENSG00000161011	ENSG00000211651	ENSG00000115758	ENSG00000239264	ENSG00000109920	ENSG00000262246	ENSG00000105856	ENSG00000142102	ENSG00000142102	ENSG00000161835	ENSG00000029363	ENSG00000111011	ENSG00000171522	ENSG00000174738	ENSG00000137486	ENSG00000197766	ENSG00000132530	ENSG00000142347	ENSG00000240864	ENSG00000140400	ENSG00000206341	ENSG00000082153
ENSG00000144655	ENSG00000105856	ENSG00000122406	ENSG00000198888	ENSG00000179335	ENSG00000171522	ENSG00000204287	ENSG00000174748	ENSG00000019582	ENSG00000146457	ENSG00000163660	ENSG00000120690	ENSG00000090104	ENSG00000211648	ENSG00000115758	ENSG00000104880	ENSG00000201778	ENSG00000213639	ENSG00000211746	ENSG00000211746	ENSG00000134899	ENSG00000100201	ENSG00000141551	ENSG00000029363	ENSG00000076641	ENSG00000154229	ENSG00000112182	ENSG00000111335	ENSG00000115956	ENSG00000025708	ENSG00000105835	ENSG00000231475	ENSG00000211660
ENSG00000109118	ENSG00000213639	ENSG00000211592	ENSG00000075624	ENSG00000153234	ENSG00000029363	ENSG00000117523	ENSG00000150991	ENSG00000123349	ENSG00000143772	ENSG00000267165	ENSG00000119048	ENSG00000082153	ENSG00000142634	ENSG00000211648	ENSG00000270505	ENSG00000153234	ENSG00000114861	ENSG00000069399	ENSG00000069399	ENSG00000101695	ENSG00000101109	ENSG00000100813	ENSG00000124193	ENSG00000172232	ENSG00000156273	ENSG00000179639	ENSG00000140105	ENSG00000132646	ENSG00000139278	ENSG00000140455	ENSG00000211649	ENSG00000168209
ENSG00000067064	ENSG00000114861	ENSG00000188846	ENSG00000122406	ENSG00000140743	ENSG00000100201	ENSG00000142178	ENSG00000221983	ENSG00000188536	ENSG00000168175	ENSG00000196843	ENSG00000211673	ENSG00000108292	ENSG00000113088	ENSG00000142634	ENSG00000173120	ENSG00000182087	ENSG00000146425	ENSG00000176845	ENSG00000176845	ENSG00000174738	ENSG00000124193	ENSG00000242114	ENSG00000179094	ENSG00000112149	ENSG00000197766	ENSG00000121879	ENSG00000254911	ENSG00000240864	ENSG00000176845	ENSG00000113448	ENSG00000211637	ENSG00000111897
ENSG00000111011	ENSG00000146425	ENSG00000089009	ENSG00000211592	ENSG00000133773	ENSG00000101109	ENSG00000187741	ENSG00000171223	ENSG00000111640	ENSG00000023445	ENSG00000109787	ENSG00000070423	ENSG00000211660	ENSG00000137441	ENSG00000113088	ENSG00000072110	ENSG00000075426	ENSG00000103342	ENSG00000116044	ENSG00000116044	ENSG00000095015	ENSG00000179094	ENSG00000134107	ENSG00000110367	ENSG00000139718	ENSG00000121350	ENSG00000197763	ENSG00000109861	ENSG00000025708	ENSG00000089127	ENSG00000105205	ENSG00000239855	ENSG00000211668
ENSG00000141551	ENSG00000198408	ENSG00000149806	ENSG00000188846	ENSG00000182087	ENSG00000124193	ENSG00000173846	ENSG00000104529	ENSG00000234741	ENSG00000105993	ENSG00000146457	ENSG00000072786	ENSG00000161547	ENSG00000166562	ENSG00000137441	ENSG00000133316	ENSG00000177606	ENSG00000131669	ENSG00000100644	ENSG00000100644	ENSG00000076641	ENSG00000110367	ENSG00000003756	ENSG00000095794	ENSG00000100448	ENSG00000179639	ENSG00000251022	ENSG00000243290	ENSG00000139278	ENSG00000222041	ENSG00000143337	ENSG00000211799	ENSG00000157601
ENSG00000100813	ENSG00000131408	ENSG00000244734	ENSG00000089009	ENSG00000075426	ENSG00000179094	ENSG00000105639	ENSG00000114942	ENSG00000127528	ENSG00000163513	ENSG00000143772	ENSG00000089737	ENSG00000255717	ENSG00000211673	ENSG00000166562	ENSG00000102760	ENSG00000138767	ENSG00000063978	ENSG00000067334	ENSG00000067334	ENSG00000251562	ENSG00000095794	ENSG00000215788	ENSG00000173039	ENSG00000257764	ENSG00000235944	ENSG00000183813	ENSG00000211640	ENSG00000176845	ENSG00000159674	ENSG00000186480	ENSG00000211964	ENSG00000138757
ENSG00000122257	ENSG00000162231	ENSG00000171863	ENSG00000149806	ENSG00000138767	ENSG00000110367	ENSG00000008128	ENSG00000105373	ENSG00000206172	ENSG00000099860	ENSG00000168175	ENSG00000100664	ENSG00000168003	ENSG00000164111	ENSG00000211673	ENSG00000142102	ENSG00000204642	ENSG00000144655	ENSG00000164040	ENSG00000164040	ENSG00000266714	ENSG00000173039	ENSG00000109920	ENSG00000130844	ENSG00000153922	ENSG00000251022	ENSG00000129757	ENSG00000155366	ENSG00000089127	ENSG00000100297	ENSG00000254087	ENSG00000185338	ENSG00000239264
ENSG00000242114	ENSG00000133226	ENSG00000114391	ENSG00000171863	ENSG00000178562	ENSG00000095794	ENSG00000105205	ENSG00000121966	ENSG00000162511	ENSG00000196352	ENSG00000023445	ENSG00000140853	ENSG00000013441	ENSG00000242534	ENSG00000164111	ENSG00000176845	ENSG00000116754	ENSG00000122085	ENSG00000177426	ENSG00000177426	ENSG00000172232	ENSG00000130844	ENSG00000104880	ENSG00000112245	ENSG00000109929	ENSG00000183813	ENSG00000245954	ENSG00000102265	ENSG00000222041	ENSG00000084234	ENSG00000000938	ENSG00000240671	ENSG00000115758
ENSG00000086062	ENSG00000103342	ENSG00000083845	ENSG00000114391	ENSG00000116754	ENSG00000173039	ENSG00000170638	ENSG00000127184	ENSG00000211679	ENSG00000171608	ENSG00000105993	ENSG00000112096	ENSG00000111897	ENSG00000254709	ENSG00000242534	ENSG00000155926	ENSG00000055044	ENSG00000109118	ENSG00000139722	ENSG00000139722	ENSG00000146067	ENSG00000112245	ENSG00000173120	ENSG00000115687	ENSG00000196415	ENSG00000185950	ENSG00000157570	ENSG00000243238	ENSG00000159674	ENSG00000206341	ENSG00000080371	ENSG00000241294	ENSG00000161011
ENSG00000003756	ENSG00000146083	ENSG00000070756	ENSG00000083845	ENSG00000055044	ENSG00000130844	ENSG00000179344	ENSG00000145741	ENSG00000136156	ENSG00000182149	ENSG00000163513	ENSG00000137575	ENSG00000211668	ENSG00000125148	ENSG00000254709	ENSG00000139636	ENSG00000105856	ENSG00000067064	ENSG00000135070	ENSG00000135070	ENSG00000112149	ENSG00000115687	ENSG00000133316	ENSG00000186174	ENSG00000254682	ENSG00000184384	ENSG00000101336	ENSG00000216490	ENSG00000100297	ENSG00000129925	ENSG00000166128	ENSG00000243264	ENSG00000211648
ENSG00000215788	ENSG00000144655	ENSG00000198786	ENSG00000070756	ENSG00000105856	ENSG00000112245	ENSG00000221978	ENSG00000133872	ENSG00000131143	ENSG00000124181	ENSG00000099860	ENSG00000170004	ENSG00000010244	ENSG00000100453	ENSG00000125148	ENSG00000245904	ENSG00000213639	ENSG00000165943	ENSG00000047410	ENSG00000047410	ENSG00000138834	ENSG00000186174	ENSG00000102760	ENSG00000184588	ENSG00000130935	ENSG00000022267	ENSG00000085265	ENSG00000196126	ENSG00000084234	ENSG00000231475	ENSG00000162496	ENSG00000120833	ENSG00000142634
ENSG00000104880	ENSG00000109118	ENSG00000182774	ENSG00000198786	ENSG00000127152	ENSG00000115687	ENSG00000158805	ENSG00000122026	ENSG00000183283	ENSG00000147457	ENSG00000117602	ENSG00000163660	ENSG00000138757	ENSG00000109787	ENSG00000100453	ENSG00000140983	ENSG00000114861	ENSG00000116752	ENSG00000139112	ENSG00000139112	ENSG00000168137	ENSG00000184588	ENSG00000183508	ENSG00000262246	ENSG00000183484	ENSG00000129757	ENSG00000166927	ENSG00000170476	ENSG00000205336	ENSG00000101160	ENSG00000149212	ENSG00000174946	ENSG00000237550
ENSG00000173120	ENSG00000067064	ENSG00000169442	ENSG00000169442	ENSG00000213639	ENSG00000157540	ENSG00000185338	ENSG00000019582	ENSG00000269968	ENSG00000166012	ENSG00000196352	ENSG00000113575	ENSG00000239264	ENSG00000168175	ENSG00000109787	ENSG00000048740	ENSG00000087087	ENSG00000163788	ENSG00000198961	ENSG00000198961	ENSG00000079313	ENSG00000262246	ENSG00000132823	ENSG00000179335	ENSG00000160307	ENSG00000138640	ENSG00000162747	ENSG00000244575	ENSG00000206341	ENSG00000198502	ENSG00000106003	ENSG00000211669	ENSG00000137959
ENSG00000133316	ENSG00000111011	ENSG00000184779	ENSG00000116251	ENSG00000114861	ENSG00000186174	ENSG00000159753	ENSG00000123349	ENSG00000104408	ENSG00000134758	ENSG00000171608	ENSG00000196843	ENSG00000115758	ENSG00000129355	ENSG00000168175	ENSG00000252061	ENSG00000198408	ENSG00000141551	ENSG00000182957	ENSG00000182957	ENSG00000139718	ENSG00000179335	ENSG00000142102	ENSG00000153234	ENSG00000170525	ENSG00000096717	ENSG00000125898	ENSG00000135916	ENSG00000129925	ENSG00000211649	ENSG00000101695	ENSG00000211934	ENSG00000137441
ENSG00000102760	ENSG00000141551	ENSG00000233927	ENSG00000210082	ENSG00000087087	ENSG00000184588	ENSG00000160796	ENSG00000127528	ENSG00000211677	ENSG00000116741	ENSG00000182149	ENSG00000109787	ENSG00000105643	ENSG00000011600	ENSG00000129355	ENSG00000144802	ENSG00000131408	ENSG00000139146	ENSG00000121749	ENSG00000121749	ENSG00000100448	ENSG00000153234	ENSG00000069399	ENSG00000140743	ENSG00000158987	ENSG00000180357	ENSG00000182578	ENSG00000172936	ENSG00000231475	ENSG00000211637	ENSG00000174738	ENSG00000064886	ENSG00000211673
ENSG00000183508	ENSG00000100813	ENSG00000116251	ENSG00000181163	ENSG00000146425	ENSG00000179335	ENSG00000187778	ENSG00000189343	ENSG00000100129	ENSG00000198355	ENSG00000124181	ENSG00000146457	ENSG00000211648	ENSG00000211662	ENSG00000011600	ENSG00000064012	ENSG00000162231	ENSG00000122257	ENSG00000172845	ENSG00000172845	ENSG00000182541	ENSG00000140743	ENSG00000176845	ENSG00000075426	ENSG00000053918	ENSG00000080546	ENSG00000127951	ENSG00000197249	ENSG00000101160	ENSG00000202538	ENSG00000069667	ENSG00000211685	ENSG00000100664
ENSG00000132823	ENSG00000122257	ENSG00000210082	ENSG00000167996	ENSG00000198408	ENSG00000153234	ENSG00000127481	ENSG00000162511	ENSG00000165502	ENSG00000113811	ENSG00000166012	ENSG00000137497	ENSG00000196776	ENSG00000099860	ENSG00000211662	ENSG00000139112	ENSG00000133226	ENSG00000242114	ENSG00000155307	ENSG00000155307	ENSG00000257764	ENSG00000182087	ENSG00000155926	ENSG00000177606	ENSG00000005381	ENSG00000157570	ENSG00000100292	ENSG00000211625	ENSG00000198502	ENSG00000101439	ENSG00000076641	ENSG00000083454	ENSG00000254709
ENSG00000069399	ENSG00000242114	ENSG00000181163	ENSG00000167658	ENSG00000141506	ENSG00000140743	ENSG00000132716	ENSG00000131143	ENSG00000211675	ENSG00000134352	ENSG00000134758	ENSG00000143772	ENSG00000120690	ENSG00000107372	ENSG00000099860	ENSG00000227766	ENSG00000103342	ENSG00000086062	ENSG00000092871	ENSG00000092871	ENSG00000153922	ENSG00000075426	ENSG00000116044	ENSG00000138767	ENSG00000065526	ENSG00000101336	ENSG00000147454	ENSG00000142347	ENSG00000211649	ENSG00000130589	ENSG00000168329	ENSG00000211936	ENSG00000125148
ENSG00000176845	ENSG00000003756	ENSG00000167996	ENSG00000187514	ENSG00000162231	ENSG00000133773	ENSG00000198837	ENSG00000183283	ENSG00000196683	ENSG00000100796	ENSG00000126524	ENSG00000168175	ENSG00000119048	ENSG00000080822	ENSG00000080822	ENSG00000055483	ENSG00000146083	ENSG00000160908	ENSG00000151327	ENSG00000151327	ENSG00000109929	ENSG00000138767	ENSG00000139636	ENSG00000204642	ENSG00000112182	ENSG00000085265	ENSG00000167768	ENSG00000104763	ENSG00000211637	ENSG00000211964	ENSG00000129226	ENSG00000140511	ENSG00000140299
ENSG00000155926	ENSG00000215788	ENSG00000167658	ENSG00000087086	ENSG00000133226	ENSG00000182087	ENSG00000243264	ENSG00000104408	ENSG00000175061	ENSG00000100221	ENSG00000116741	ENSG00000023445	ENSG00000211673	ENSG00000189159	ENSG00000189159	ENSG00000138166	ENSG00000144655	ENSG00000174579	ENSG00000005812	ENSG00000005812	ENSG00000196415	ENSG00000204642	ENSG00000245904	ENSG00000178562	ENSG00000121879	ENSG00000166927		ENSG00000137752	ENSG00000202538	ENSG00000139192	ENSG00000112149	ENSG00000211638	ENSG00000100453
ENSG00000116044	ENSG00000109920	ENSG00000187514	ENSG00000135486	ENSG00000146083	ENSG00000075426	ENSG00000130254	ENSG00000100129	ENSG00000152518	ENSG00000171522	ENSG00000198355	ENSG00000105993	ENSG00000070423	ENSG00000158869	ENSG00000182054	ENSG00000140564	ENSG00000109118	ENSG00000078589	ENSG00000105879	ENSG00000105879	ENSG00000254682	ENSG00000178562	ENSG00000140983	ENSG00000168610	ENSG00000136932	ENSG00000162747		ENSG00000188313	ENSG00000101439	ENSG00000179344	ENSG00000027697	ENSG00000211652	ENSG00000113575
ENSG00000139636	ENSG00000104880	ENSG00000087086	ENSG00000248527	ENSG00000144655	ENSG00000177606	ENSG00000162032	ENSG00000165502	ENSG00000227097	ENSG00000029363	ENSG00000113811	ENSG00000211662	ENSG00000089737	ENSG00000182054	ENSG00000211671	ENSG00000196187	ENSG00000067064	ENSG00000173120	ENSG00000147162	ENSG00000147162	ENSG00000130935	ENSG00000116754	ENSG00000252061	ENSG00000105856	ENSG00000179456	ENSG00000182578		ENSG00000185507	ENSG00000130589	ENSG00000171476	ENSG00000221743	ENSG00000139168	ENSG00000183726
ENSG00000245904	ENSG00000173120	ENSG00000135486	ENSG00000174748	ENSG00000122085	ENSG00000138767	ENSG00000198089	ENSG00000211675	ENSG00000203875	ENSG00000101109	ENSG00000134352	ENSG00000104852	ENSG00000100664	ENSG00000134046	ENSG00000143870	ENSG00000271581	ENSG00000111011	ENSG00000133316	ENSG00000113580	ENSG00000113580	ENSG00000183484	ENSG00000168610	ENSG00000164040	ENSG00000127152	ENSG00000183813	ENSG00000127951		ENSG00000133106	ENSG00000134539	ENSG00000254087	ENSG00000066336	ENSG00000239672	ENSG00000168175
ENSG00000005483	ENSG00000133316	ENSG00000174748	ENSG00000111348	ENSG00000109118	ENSG00000204642	ENSG00000112787	ENSG00000196683	ENSG00000220842	ENSG00000124193	ENSG00000100796	ENSG00000163513	ENSG00000254709	ENSG00000211671	ENSG00000126524	ENSG00000129925	ENSG00000141551	ENSG00000102760	ENSG00000137947	ENSG00000137947	ENSG00000160307	ENSG00000105856	ENSG00000177426	ENSG00000213639	ENSG00000084093	ENSG00000100292		ENSG00000111331	ENSG00000239855	ENSG00000000938	ENSG00000171206	ENSG00000211655	ENSG00000023445
ENSG00000100644	ENSG00000102760	ENSG00000111348	ENSG00000196262	ENSG00000099331	ENSG00000178562	ENSG00000173575	ENSG00000175061	ENSG00000065978	ENSG00000179094	ENSG00000185115	ENSG00000099860	ENSG00000140853	ENSG00000143870	ENSG00000132967	ENSG00000198218	ENSG00000100813	ENSG00000141582	ENSG00000139620	ENSG00000139620	ENSG00000170525	ENSG00000127152	ENSG00000139722	ENSG00000114861	ENSG00000271941	ENSG00000167768		ENSG00000240864	ENSG00000105205	ENSG00000243264	ENSG00000198836	ENSG00000108106	ENSG00000011600
ENSG00000252061	ENSG00000178971	ENSG00000196262	ENSG00000150991	ENSG00000067064	ENSG00000116754	ENSG00000135164	ENSG00000220842	ENSG00000133639	ENSG00000153179	ENSG00000100221	ENSG00000107372	ENSG00000112096	ENSG00000126524	ENSG00000116741	ENSG00000160633	ENSG00000122257	ENSG00000234617	ENSG00000129460	ENSG00000129460	ENSG00000163874	ENSG00000213639	ENSG00000196756	ENSG00000089351	ENSG00000271964			ENSG00000025708	ENSG00000211964	ENSG00000117228	ENSG00000153922	ENSG00000211965	ENSG00000211662
ENSG00000164040	ENSG00000183508	ENSG00000150991	ENSG00000221983	ENSG00000015133	ENSG00000055044	ENSG00000145191	ENSG00000133639	ENSG00000132465	ENSG00000110367	ENSG00000171522	ENSG00000080822	ENSG00000137575	ENSG00000132967	ENSG00000198355	ENSG00000172932	ENSG00000242114	ENSG00000183508	ENSG00000117523	ENSG00000117523	ENSG00000005381	ENSG00000114861	ENSG00000139112	ENSG00000146425	ENSG00000166046			ENSG00000139278	ENSG00000179344	ENSG00000187118	ENSG00000109929	ENSG00000211611	ENSG00000080822
ENSG00000177426	ENSG00000132823	ENSG00000221983	ENSG00000104529	ENSG00000165943	ENSG00000105856	ENSG00000136270	ENSG00000118503	ENSG00000164924	ENSG00000095794	ENSG00000029363	ENSG00000171608	ENSG00000163660	ENSG00000116741	ENSG00000171522	ENSG00000151327	ENSG00000204316	ENSG00000132823	ENSG00000140455	ENSG00000140455	ENSG00000121716	ENSG00000089351	ENSG00000227766	ENSG00000198408	ENSG00000114796			ENSG00000176845	ENSG00000171476	ENSG00000211669	ENSG00000135956	ENSG00000261416	ENSG00000166848
ENSG00000139722	ENSG00000142102	ENSG00000171223	ENSG00000114942	ENSG00000011243	ENSG00000127152	ENSG00000076924	ENSG00000132465	ENSG00000122862	ENSG00000173039	ENSG00000101109	ENSG00000211671	ENSG00000113575	ENSG00000198355	ENSG00000117632	ENSG00000072310	ENSG00000003756	ENSG00000069399	ENSG00000113448	ENSG00000113448	ENSG00000178199	ENSG00000087087	ENSG00000055483	ENSG00000135821	ENSG00000168092			ENSG00000068079	ENSG00000254087	ENSG00000258486	ENSG00000183484	ENSG00000265558	ENSG00000211671
ENSG00000196756	ENSG00000069399	ENSG00000104529	ENSG00000105373	ENSG00000182179	ENSG00000213639	ENSG00000136271	ENSG00000164924	ENSG00000266751	ENSG00000130844	ENSG00000162613	ENSG00000182149	ENSG00000196843	ENSG00000171522	ENSG00000179094	ENSG00000140400	ENSG00000215788	ENSG00000176845	ENSG00000142178	ENSG00000142178	ENSG00000065526	ENSG00000146425	ENSG00000138166	ENSG00000162231	ENSG00000255594			ENSG00000089127	ENSG00000000938	ENSG00000181036	ENSG00000112297	ENSG00000171848	ENSG00000163220
ENSG00000135070	ENSG00000176845	ENSG00000114942	ENSG00000273149	ENSG00000166669	ENSG00000114861	ENSG00000245532	ENSG00000122862	ENSG00000137970	ENSG00000112245	ENSG00000124193	ENSG00000124181	ENSG00000109787	ENSG00000117632	ENSG00000140105	ENSG00000091592	ENSG00000109920	ENSG00000155926	ENSG00000101445	ENSG00000101445	ENSG00000112182	ENSG00000198408	ENSG00000140564	ENSG00000133226	ENSG00000132510			ENSG00000222041	ENSG00000243264	ENSG00000221566	ENSG00000111711	ENSG00000123131	ENSG00000126524
ENSG00000139112	ENSG00000155926	ENSG00000104964	ENSG00000008517	ENSG00000116752	ENSG00000146425	ENSG00000161835	ENSG00000125743	ENSG00000188243	ENSG00000115687	ENSG00000179094	ENSG00000134758	ENSG00000146457	ENSG00000076944	ENSG00000112245	ENSG00000204287	ENSG00000104880	ENSG00000116044	ENSG00000173846	ENSG00000173846	ENSG00000171988	ENSG00000135821	ENSG00000196187	ENSG00000103342	ENSG00000080546			ENSG00000159674	ENSG00000187118	ENSG00000211685	ENSG00000167851	ENSG00000184470	ENSG00000170345
ENSG00000055483	ENSG00000116044	ENSG00000105373	ENSG00000127184	ENSG00000111011	ENSG00000198408	ENSG00000136878	ENSG00000269888	ENSG00000156467	ENSG00000157540	ENSG00000153179	ENSG00000126524	ENSG00000137497	ENSG00000179094	ENSG00000108953	ENSG00000135048	ENSG00000173120	ENSG00000005483	ENSG00000169018	ENSG00000169018	ENSG00000221792	ENSG00000141506	ENSG00000129925	ENSG00000146083	ENSG00000104671			ENSG00000100297	ENSG00000211669	ENSG00000163564	ENSG00000134184	ENSG00000185880	ENSG00000116741
ENSG00000138166	ENSG00000139636	ENSG00000008517	ENSG00000237973	ENSG00000163788	ENSG00000141506	ENSG00000064886	ENSG00000266751	ENSG00000239951	ENSG00000186174	ENSG00000110367	ENSG00000116741	ENSG00000143772	ENSG00000140105	ENSG00000241755	ENSG00000117523	ENSG00000232956	ENSG00000100644	ENSG00000143337	ENSG00000143337	ENSG00000121879	ENSG00000162231	ENSG00000198218	ENSG00000131669	ENSG00000129315			ENSG00000129625	ENSG00000129277	ENSG00000211792	ENSG00000170525	ENSG00000211939	ENSG00000198355
ENSG00000140564	ENSG00000245904	ENSG00000185885	ENSG00000145741	ENSG00000141551	ENSG00000162231	ENSG00000116717	ENSG00000137970	ENSG00000026508	ENSG00000184588	ENSG00000095794	ENSG00000198355	ENSG00000168175	ENSG00000112245	ENSG00000115687	ENSG00000113448	ENSG00000072110	ENSG00000252061	ENSG00000171476	ENSG00000171476	ENSG00000264198	ENSG00000133226	ENSG00000155307	ENSG00000063978	ENSG00000197860			ENSG00000206341	ENSG00000258486	ENSG00000121858	ENSG00000257923	ENSG00000184979	ENSG00000051108
ENSG00000121749	ENSG00000005483	ENSG00000121966	ENSG00000196154	ENSG00000100813	ENSG00000133226	ENSG00000140521	ENSG00000188243	ENSG00000211666	ENSG00000262246	ENSG00000173039	ENSG00000051108	ENSG00000129355	ENSG00000108953	ENSG00000134285	ENSG00000142178	ENSG00000133316	ENSG00000067334	ENSG00000101901	ENSG00000101901	ENSG00000136932	ENSG00000103342	ENSG00000151327	ENSG00000122085	ENSG00000262456			ENSG00000129925	ENSG00000181036	ENSG00000172965	ENSG00000126759	ENSG00000165264	ENSG00000113811
ENSG00000198218	ENSG00000140983	ENSG00000127184	ENSG00000170315	ENSG00000122257	ENSG00000103342	ENSG00000103657	ENSG00000178982	ENSG00000175390	ENSG00000179335	ENSG00000130844	ENSG00000113811	ENSG00000023445	ENSG00000241755	ENSG00000074842	ENSG00000187741	ENSG00000102760	ENSG00000164040	ENSG00000115548	ENSG00000115548	ENSG00000179456	ENSG00000146083	ENSG00000072310	ENSG00000109118	ENSG00000229807			ENSG00000231475	ENSG00000221566	ENSG00000168329	ENSG00000100364	ENSG00000241244	ENSG00000171522
ENSG00000155307	ENSG00000100644	ENSG00000145741	ENSG00000117289	ENSG00000242114	ENSG00000131669	ENSG00000106003	ENSG00000147677	ENSG00000100100	ENSG00000201778	ENSG00000112245	ENSG00000100796	ENSG00000105993	ENSG00000134285	ENSG00000201778	ENSG00000173846	ENSG00000178971	ENSG00000177426	ENSG00000080371	ENSG00000080371	ENSG00000183813	ENSG00000063978	ENSG00000140400	ENSG00000067064	ENSG00000118513			ENSG00000101160	ENSG00000211685	ENSG00000002549	ENSG00000053918	ENSG00000187837	ENSG00000179094
ENSG00000157933	ENSG00000252061	ENSG00000196154	ENSG00000092841	ENSG00000160908	ENSG00000063978	ENSG00000105726	ENSG00000156467	ENSG00000169714	ENSG00000153234	ENSG00000115687	ENSG00000185115	ENSG00000211662	ENSG00000074842	ENSG00000254911	ENSG00000008128	ENSG00000183508	ENSG00000139722	ENSG00000166128	ENSG00000166128	ENSG00000084093	ENSG00000122085	ENSG00000259813	ENSG00000015133	ENSG00000162747			ENSG00000198502	ENSG00000163564	ENSG00000211652	ENSG00000135677	ENSG00000211658	ENSG00000110367
ENSG00000114784	ENSG00000164040	ENSG00000170315	ENSG00000122026	ENSG00000174579	ENSG00000144655	ENSG00000117616	ENSG00000239951	ENSG00000234797	ENSG00000140743	ENSG00000157540	ENSG00000100221	ENSG00000163513	ENSG00000197471	ENSG00000153234	ENSG00000105205	ENSG00000132823	ENSG00000135070	ENSG00000198089	ENSG00000198089	ENSG00000271964	ENSG00000109118	ENSG00000091592	ENSG00000111011	ENSG00000124466			ENSG00000211649	ENSG00000211792	ENSG00000129226	ENSG00000137486	ENSG00000164978	ENSG00000112245
ENSG00000151327	ENSG00000177426	ENSG00000133872	ENSG00000019582	ENSG00000078589	ENSG00000122085	ENSG00000255026	ENSG00000026508	ENSG00000163479	ENSG00000182087	ENSG00000186174	ENSG00000171522	ENSG00000099860	ENSG00000201778	ENSG00000133773	ENSG00000170638	ENSG00000142102	ENSG00000139112	ENSG00000088179	ENSG00000088179	ENSG00000166046	ENSG00000099331	ENSG00000139620	ENSG00000163788	ENSG00000147454			ENSG00000211637	ENSG00000026751	ENSG00000196839	ENSG00000069702	ENSG00000196141	ENSG00000241755
ENSG00000005812	ENSG00000139722	ENSG00000092841	ENSG00000225630	ENSG00000003756	ENSG00000109118	ENSG00000077044	ENSG00000211666	ENSG00000198668	ENSG00000075426	ENSG00000184588	ENSG00000029363	ENSG00000107372	ENSG00000254911	ENSG00000243290	ENSG00000179344	ENSG00000069399	ENSG00000198961	ENSG00000187118	ENSG00000187118	ENSG00000168092	ENSG00000067064	ENSG00000135048	ENSG00000141551	ENSG00000167768			ENSG00000202538	ENSG00000121858	ENSG00000141367	ENSG00000155304	ENSG00000103254	ENSG00000184588
ENSG00000072310	ENSG00000144802	ENSG00000122026	ENSG00000102879	ENSG00000215788	ENSG00000067064	ENSG00000100258	ENSG00000105202	ENSG00000169567	ENSG00000177606	ENSG00000179335	ENSG00000100201	ENSG00000080822	ENSG00000153234	ENSG00000211640	ENSG00000221978	ENSG00000176845	ENSG00000244462	ENSG00000164463	ENSG00000164463	ENSG00000255594	ENSG00000015133	ENSG00000117523	ENSG00000100813				ENSG00000101439	ENSG00000172965	ENSG00000180739	ENSG00000156273	ENSG00000222328	ENSG00000153234
ENSG00000120705	ENSG00000196756	ENSG00000019582	ENSG00000229164	ENSG00000109920	ENSG00000015133	ENSG00000251562	ENSG00000175390	ENSG00000230629	ENSG00000138767	ENSG00000084463	ENSG00000101109	ENSG00000053254	ENSG00000243290	ENSG00000075426	ENSG00000158805	ENSG00000155926	ENSG00000055483	ENSG00000162496	ENSG00000162496	ENSG00000132510	ENSG00000111011	ENSG00000113448	ENSG00000122257				ENSG00000130589	ENSG00000168329	ENSG00000211655	ENSG00000075234	ENSG00000164687	ENSG00000140743
ENSG00000139620	ENSG00000139112	ENSG00000102879	ENSG00000109971	ENSG00000104880	ENSG00000165943	ENSG00000116679	ENSG00000100100	ENSG00000228474	ENSG00000204642	ENSG00000153234	ENSG00000124193	ENSG00000166848	ENSG00000211640	ENSG00000204642	ENSG00000185338	ENSG00000116044	ENSG00000134294	ENSG00000079332	ENSG00000079332	ENSG00000080546	ENSG00000163788	ENSG00000005339	ENSG00000242114				ENSG00000138496	ENSG00000211652	ENSG00000255569	ENSG00000197766	ENSG00000211974	ENSG00000133773
ENSG00000135048	ENSG00000055483	ENSG00000229164	ENSG00000123349	ENSG00000173120	ENSG00000166669	ENSG00000125447	ENSG00000234797	ENSG00000100906	ENSG00000178562	ENSG00000140743	ENSG00000179094	ENSG00000171608	ENSG00000075426	ENSG00000155366	ENSG00000054118	ENSG00000139636	ENSG00000140564	ENSG00000181036	ENSG00000181036	ENSG00000104671	ENSG00000141551	ENSG00000142178	ENSG00000086062				ENSG00000134539	ENSG00000129226	ENSG00000221743	ENSG00000112182	ENSG00000196565	ENSG00000243290
ENSG00000117523	ENSG00000138166	ENSG00000109971	ENSG00000111640	ENSG00000232956	ENSG00000116752	ENSG00000103257	ENSG00000163479	ENSG00000166794	ENSG00000116754	ENSG00000133773	ENSG00000110367	ENSG00000211671	ENSG00000204642	ENSG00000240382	ENSG00000132716	ENSG00000245904	ENSG00000121749	ENSG00000163659	ENSG00000163659	ENSG00000129315	ENSG00000100813	ENSG00000101445	ENSG00000078589				ENSG00000211964	ENSG00000180739	ENSG00000066336	ENSG00000121350	ENSG00000100721	ENSG00000211829
ENSG00000140455	ENSG00000140564	ENSG00000234745	ENSG00000108518	ENSG00000135655	ENSG00000111011	ENSG00000266714	ENSG00000198668	ENSG00000063046	ENSG00000055044	ENSG00000129518	ENSG00000095794	ENSG00000134758	ENSG00000155366	ENSG00000243238	ENSG00000243264	ENSG00000140983	ENSG00000172845	ENSG00000119950	ENSG00000119950	ENSG00000197860	ENSG00000122257	ENSG00000173846	ENSG00000003756				ENSG00000139192	ENSG00000211655	ENSG00000173465	ENSG00000179639	ENSG00000240834	ENSG00000137965
ENSG00000113448	ENSG00000196187	ENSG00000123349	ENSG00000111716	ENSG00000124222	ENSG00000163788	ENSG00000134900	ENSG00000230629	ENSG00000243678	ENSG00000168610	ENSG00000075426	ENSG00000173039	ENSG00000126524	ENSG00000240382	ENSG00000216490	ENSG00000255198	ENSG00000048740	ENSG00000155307	ENSG00000161835	ENSG00000161835	ENSG00000262456	ENSG00000242114	ENSG00000008128	ENSG00000215788				ENSG00000179344	ENSG00000255569	ENSG00000211965	ENSG00000056558	ENSG00000211639	ENSG00000211640
ENSG00000005339	ENSG00000198218	ENSG00000111640	ENSG00000162511	ENSG00000133316	ENSG00000141551	ENSG00000092931	ENSG00000228474	ENSG00000204525	ENSG00000105856	ENSG00000177606	ENSG00000130844	ENSG00000116741	ENSG00000243238	ENSG00000196126	ENSG00000173575	ENSG00000100644	ENSG00000114784	ENSG00000111615	ENSG00000111615	ENSG00000124466	ENSG00000086062	ENSG00000105205	ENSG00000109920				ENSG00000260342	ENSG00000066336	ENSG00000160209	ENSG00000121879	ENSG00000211664	ENSG00000177606
ENSG00000142178	ENSG00000155307	ENSG00000108518	ENSG00000211679	ENSG00000102760	ENSG00000100813	ENSG00000073169	ENSG00000063046	ENSG00000132507	ENSG00000127152	ENSG00000138767	ENSG00000112245	ENSG00000198355	ENSG00000216490	ENSG00000170476	ENSG00000135164	ENSG00000252061	ENSG00000151327	ENSG00000149212	ENSG00000149212	ENSG00000147454	ENSG00000078589	ENSG00000170638	ENSG00000104880				ENSG00000171476	ENSG00000173465	ENSG00000113368	ENSG00000154310	ENSG00000238528	ENSG00000172115
ENSG00000263575	ENSG00000172932	ENSG00000111716	ENSG00000136156	ENSG00000141582	ENSG00000122257	ENSG00000158773	ENSG00000204525	ENSG00000107742	ENSG00000213639	ENSG00000204642	ENSG00000115687	ENSG00000051108	ENSG00000196126	ENSG00000244575	ENSG00000145191	ENSG00000164040	ENSG00000005812	ENSG00000170852	ENSG00000170852	ENSG00000167768	ENSG00000003756	ENSG00000179344	ENSG00000173120				ENSG00000254087	ENSG00000211965	ENSG00000211611	ENSG00000197763	ENSG00000259261	ENSG00000240382
ENSG00000101445	ENSG00000114784	ENSG00000234741	ENSG00000105374	ENSG00000178971	ENSG00000242114	ENSG00000146067	ENSG00000107742	ENSG00000109332	ENSG00000114861	ENSG00000178562	ENSG00000157540	ENSG00000113811	ENSG00000170476	ENSG00000135916	ENSG00000136270	ENSG00000177426	ENSG00000113580	ENSG00000211792	ENSG00000211792		ENSG00000215788	ENSG00000221978	ENSG00000072110				ENSG00000000938	ENSG00000160209	ENSG00000171848	ENSG00000155629	ENSG00000223350	ENSG00000243238
ENSG00000173846	ENSG00000151327	ENSG00000206172	ENSG00000131143	ENSG00000183508	ENSG00000086062	ENSG00000185359	ENSG00000130522	ENSG00000113387	ENSG00000089351	ENSG00000116754	ENSG00000186174	ENSG00000100796	ENSG00000244575	ENSG00000144655	ENSG00000076924	ENSG00000139722	ENSG00000213782	ENSG00000101695	ENSG00000101695		ENSG00000109920	ENSG00000185338	ENSG00000133316				ENSG00000243264	ENSG00000113368	ENSG00000119917	ENSG00000188820	ENSG00000163599	ENSG00000216490
ENSG00000105205	ENSG00000005812	ENSG00000189343	ENSG00000117091	ENSG00000132823	ENSG00000160908	ENSG00000038358	ENSG00000206503	ENSG00000130522	ENSG00000146425	ENSG00000055044	ENSG00000184588	ENSG00000185115	ENSG00000135916	ENSG00000121864	ENSG00000100441	ENSG00000144802	ENSG00000120705	ENSG00000163811	ENSG00000163811		ENSG00000104880	ENSG00000054118	ENSG00000102760				ENSG00000211694	ENSG00000211611	ENSG00000167851	ENSG00000136932	ENSG00000165617	ENSG00000196126
ENSG00000179344	ENSG00000072310	ENSG00000162511	ENSG00000197956	ENSG00000142102	ENSG00000152495	ENSG00000134186	ENSG00000185787	ENSG00000206503	ENSG00000198408	ENSG00000168610	ENSG00000262246	ENSG00000100221	ENSG00000172936	ENSG00000197249	ENSG00000136271	ENSG00000196756	ENSG00000185905	ENSG00000069667	ENSG00000069667		ENSG00000173120	ENSG00000132716	ENSG00000141582				ENSG00000117228	ENSG00000171848	ENSG00000143878	ENSG00000179456	ENSG00000211650	ENSG00000105856
ENSG00000221978	ENSG00000140400	ENSG00000211679	ENSG00000140264	ENSG00000069399	ENSG00000174579	ENSG00000112149	ENSG00000269893	ENSG00000185787	ENSG00000131408	ENSG00000105856	ENSG00000179335	ENSG00000171522	ENSG00000144655	ENSG00000211940	ENSG00000245532	ENSG00000139112	ENSG00000137947	ENSG00000076641	ENSG00000076641		ENSG00000072110	ENSG00000164466	ENSG00000178971				ENSG00000187118	ENSG00000167851	ENSG00000134184	ENSG00000104324	ENSG00000256862	ENSG00000170476
ENSG00000186918	ENSG00000259813	ENSG00000134954	ENSG00000183283	ENSG00000176845	ENSG00000078589	ENSG00000138834	ENSG00000227081	ENSG00000141522	ENSG00000135821	ENSG00000171867	ENSG00000201778	ENSG00000029363	ENSG00000197249	ENSG00000114850	ENSG00000161835	ENSG00000227766	ENSG00000139620	ENSG00000103257	ENSG00000103257		ENSG00000133316	ENSG00000243264	ENSG00000234617				ENSG00000211669	ENSG00000143878	ENSG00000107968	ENSG00000183813	ENSG00000211942	ENSG00000171867
ENSG00000054118	ENSG00000147162	ENSG00000136156	ENSG00000188404	ENSG00000168056	ENSG00000003756	ENSG00000132300	ENSG00000149100	ENSG00000269893	ENSG00000162231	ENSG00000127152	ENSG00000153234	ENSG00000100201	ENSG00000211940	ENSG00000211625	ENSG00000136878	ENSG00000055483	ENSG00000115306	ENSG00000112149	ENSG00000112149		ENSG00000102760	ENSG00000166128	ENSG00000183508				ENSG00000129277	ENSG00000134184	ENSG00000257923	ENSG00000129757	ENSG00000123219	ENSG00000146425
ENSG00000164466	ENSG00000091592	ENSG00000198851	ENSG00000087460	ENSG00000071054	ENSG00000215788	ENSG00000174953	ENSG00000235552	ENSG00000178980	ENSG00000133226	ENSG00000213639	ENSG00000140743	ENSG00000101109	ENSG00000114850	ENSG00000142347	ENSG00000165782	ENSG00000138166	ENSG00000129460	ENSG00000180739	ENSG00000180739		ENSG00000178971	ENSG00000198089	ENSG00000132823				ENSG00000258486	ENSG00000107968	ENSG00000126759	ENSG00000166046	ENSG00000123975	ENSG00000244575
ENSG00000115548	ENSG00000120705	ENSG00000105374	ENSG00000269968	ENSG00000061938	ENSG00000109920	ENSG00000161204	ENSG00000143761	ENSG00000245910	ENSG00000103342	ENSG00000114861	ENSG00000133773	ENSG00000124193	ENSG00000211625	ENSG00000165943	ENSG00000163600	ENSG00000140564	ENSG00000135048	ENSG00000138834	ENSG00000138834		ENSG00000234617	ENSG00000162496	ENSG00000069399				ENSG00000181036	ENSG00000073861	ENSG00000100364	ENSG00000176095	ENSG00000253818	ENSG00000131669
ENSG00000080371	ENSG00000139620	ENSG00000131143	ENSG00000187109	ENSG00000116044	ENSG00000104880	ENSG00000165458	ENSG00000244398	ENSG00000070831	ENSG00000146083	ENSG00000146425	ENSG00000182087	ENSG00000179094	ENSG00000142347	ENSG00000166508	ENSG00000116717	ENSG00000196187	ENSG00000105835	ENSG00000115520	ENSG00000115520		ENSG00000183508	ENSG00000255198	ENSG00000168036				ENSG00000221566	ENSG00000257923	ENSG00000135677	ENSG00000114796	ENSG00000211642	ENSG00000144655
ENSG00000166128	ENSG00000135048	ENSG00000117091	ENSG00000187653	ENSG00000139636	ENSG00000173120	ENSG00000153922	ENSG00000104660	ENSG00000149100	ENSG00000063978	ENSG00000198408	ENSG00000007168	ENSG00000110367	ENSG00000166508	ENSG00000162783	ENSG00000140521	ENSG00000198218	ENSG00000140455	ENSG00000116604	ENSG00000116604		ENSG00000132823	ENSG00000173575	ENSG00000176845				ENSG00000211685	ENSG00000126759	ENSG00000186810	ENSG00000168092	ENSG00000211670	ENSG00000121864
ENSG00000223244	ENSG00000117523	ENSG00000197956	ENSG00000104408	ENSG00000005483	ENSG00000163597	ENSG00000104517	ENSG00000228830	ENSG00000143761	ENSG00000144655	ENSG00000131408	ENSG00000211640	ENSG00000095794	ENSG00000162783	ENSG00000166669	ENSG00000211638	ENSG00000155307	ENSG00000113448	ENSG00000255569	ENSG00000255569		ENSG00000142102	ENSG00000145191	ENSG00000071054				ENSG00000163564	ENSG00000255819	ENSG00000137486	ENSG00000137502		ENSG00000211940
ENSG00000184602	ENSG00000140455	ENSG00000140264	ENSG00000211677	ENSG00000140983	ENSG00000232956	ENSG00000109929	ENSG00000215030	ENSG00000106153	ENSG00000122085	ENSG00000135821	ENSG00000187555	ENSG00000173039	ENSG00000185507	ENSG00000171310	ENSG00000103657	ENSG00000172932	ENSG00000005339	ENSG00000027697	ENSG00000027697		ENSG00000069399	ENSG00000076924	ENSG00000155926				ENSG00000211792	ENSG00000100364	ENSG00000069702	ENSG00000145349		ENSG00000007312
ENSG00000264211	ENSG00000113448	ENSG00000183283	ENSG00000026025	ENSG00000100644	ENSG00000133316	ENSG00000025770	ENSG00000167468	ENSG00000104660	ENSG00000109118	ENSG00000162231	ENSG00000075426	ENSG00000130844	ENSG00000111011	ENSG00000111011	ENSG00000106003	ENSG00000114784	ENSG00000142178	ENSG00000144048	ENSG00000144048		ENSG00000168036	ENSG00000100441	ENSG00000116044				ENSG00000026751	ENSG00000135677	ENSG00000126458	ENSG00000070961		ENSG00000162783
ENSG00000162496	ENSG00000005339	ENSG00000087460	ENSG00000104904	ENSG00000252061	ENSG00000102760	ENSG00000100429	ENSG00000132002	ENSG00000228830	ENSG00000067064	ENSG00000133226	ENSG00000177606	ENSG00000112245	ENSG00000115956	ENSG00000115956	ENSG00000105726	ENSG00000151327	ENSG00000104765	ENSG00000107679	ENSG00000107679		ENSG00000176845	ENSG00000136271	ENSG00000139636				ENSG00000121858	ENSG00000186810	ENSG00000055332	ENSG00000245954		ENSG00000116752
ENSG00000255198	ENSG00000142178	ENSG00000269968	ENSG00000212802	ENSG00000164040	ENSG00000141582	ENSG00000129933	ENSG00000150593	ENSG00000215030	ENSG00000015133	ENSG00000103342	ENSG00000138767	ENSG00000170881	ENSG00000111331	ENSG00000122257	ENSG00000099992	ENSG00000072310	ENSG00000101445	ENSG00000033800	ENSG00000033800		ENSG00000168056	ENSG00000163659	ENSG00000005483				ENSG00000172965	ENSG00000137486	ENSG00000196961	ENSG00000104671		ENSG00000133106
ENSG00000173575	ENSG00000187741	ENSG00000187109	ENSG00000185201	ENSG00000177426	ENSG00000178971	ENSG00000197912	ENSG00000158985	ENSG00000167468	ENSG00000111011	ENSG00000065413	ENSG00000204642	ENSG00000241755	ENSG00000132646	ENSG00000111331	ENSG00000255026	ENSG00000140400	ENSG00000173846	ENSG00000139718	ENSG00000139718		ENSG00000071054	ENSG00000245532	ENSG00000048740				ENSG00000168329	ENSG00000069702	ENSG00000004468	ENSG00000169896		ENSG00000115956
ENSG00000076924	ENSG00000101445	ENSG00000187653	ENSG00000100129	ENSG00000139722	ENSG00000234617	ENSG00000108963	ENSG00000118816	ENSG00000132002	ENSG00000163788	ENSG00000131669	ENSG00000178562	ENSG00000115687	ENSG00000141556	ENSG00000242114	ENSG00000077044	ENSG00000259813	ENSG00000143337	ENSG00000153922	ENSG00000153922		ENSG00000155926	ENSG00000100226	ENSG00000100644				ENSG00000002549	ENSG00000126458	ENSG00000202198	ENSG00000197860		ENSG00000122257
ENSG00000100441	ENSG00000173846	ENSG00000104408	ENSG00000128340	ENSG00000144802	ENSG00000183508	ENSG00000161904	ENSG00000189067	ENSG00000150593	ENSG00000141551	ENSG00000063978	ENSG00000116754	ENSG00000157540	ENSG00000155660	ENSG00000132646	ENSG00000251562	ENSG00000147162	ENSG00000008952	ENSG00000115540	ENSG00000115540		ENSG00000116044	ENSG00000161835	ENSG00000252061				ENSG00000211652	ENSG00000196961	ENSG00000211658	ENSG00000101336		ENSG00000099246
ENSG00000136271	ENSG00000008128	ENSG00000026025	ENSG00000165502	ENSG00000196756	ENSG00000132823	ENSG00000104859	ENSG00000100353	ENSG00000176340	ENSG00000100813	ENSG00000144655	ENSG00000055044	ENSG00000186174	ENSG00000160908	ENSG00000155660	ENSG00000116679	ENSG00000091592	ENSG00000179344	ENSG00000109929	ENSG00000109929		ENSG00000139636	ENSG00000165782	ENSG00000164040				ENSG00000211777	ENSG00000004468	ENSG00000135362	ENSG00000262456		ENSG00000160908
ENSG00000163659	ENSG00000105205	ENSG00000104904	ENSG00000211675	ENSG00000135070	ENSG00000142102	ENSG00000119707	ENSG00000065809	ENSG00000146278	ENSG00000161526	ENSG00000122085	ENSG00000168610	ENSG00000184588	ENSG00000240864	ENSG00000160908	ENSG00000103257	ENSG00000120705	ENSG00000221823	ENSG00000116731	ENSG00000116731		ENSG00000005483	ENSG00000163600	ENSG00000177426				ENSG00000129226	ENSG00000202198	ENSG00000075234	ENSG00000149577		ENSG00000240864
ENSG00000119950	ENSG00000170638	ENSG00000212802	ENSG00000149925	ENSG00000064012	ENSG00000069399	ENSG00000183484	ENSG00000188042	ENSG00000172543	ENSG00000122257	ENSG00000109118	ENSG00000105856	ENSG00000262246	ENSG00000235162	ENSG00000240864	ENSG00000266714	ENSG00000139620	ENSG00000186918	ENSG00000165355	ENSG00000165355		ENSG00000140983	ENSG00000116717	ENSG00000139722				ENSG00000196839	ENSG00000211658	ENSG00000197766	ENSG00000150045		ENSG00000235162
ENSG00000161835	ENSG00000179344	ENSG00000100650	ENSG00000136167	ENSG00000139112	ENSG00000176845	ENSG00000128159	ENSG00000168421	ENSG00000158985	ENSG00000242114	ENSG00000067064	ENSG00000170476	ENSG00000086061	ENSG00000134107	ENSG00000235162	ENSG00000134900	ENSG00000204287	ENSG00000101901	ENSG00000059758	ENSG00000059758		ENSG00000048740	ENSG00000211638	ENSG00000144802				ENSG00000147471	ENSG00000135362	ENSG00000179639	ENSG00000110057		ENSG00000134107
ENSG00000165782	ENSG00000221978	ENSG00000185201	ENSG00000147168	ENSG00000227766	ENSG00000168056	ENSG00000170873	ENSG00000126353	ENSG00000189067	ENSG00000205268	ENSG00000165943	ENSG00000127152	ENSG00000179335	ENSG00000159111	ENSG00000134107	ENSG00000073169	ENSG00000135048	ENSG00000164466	ENSG00000270075	ENSG00000270075		ENSG00000100644	ENSG00000106003	ENSG00000196756				ENSG00000211655	ENSG00000075234	ENSG00000222328	ENSG00000143751		ENSG00000159111
ENSG00000163600	ENSG00000158805	ENSG00000100129	ENSG00000211459	ENSG00000055483	ENSG00000071054	ENSG00000265558	ENSG00000128016	ENSG00000065809	ENSG00000086062	ENSG00000166669	ENSG00000213639	ENSG00000201778	ENSG00000103335	ENSG00000159111	ENSG00000146067	ENSG00000117523	ENSG00000115548	ENSG00000197329	ENSG00000197329		ENSG00000252061	ENSG00000101695	ENSG00000135070				ENSG00000255569	ENSG00000197766	ENSG00000111885	ENSG00000085265		ENSG00000078589
ENSG00000116717	ENSG00000185338	ENSG00000128340	ENSG00000196683	ENSG00000171456	ENSG00000155926	ENSG00000144711	ENSG00000211591	ENSG00000188042	ENSG00000160908	ENSG00000182670	ENSG00000114861	ENSG00000084463	ENSG00000131871	ENSG00000103335	ENSG00000143924	ENSG00000140455	ENSG00000080371	ENSG00000130935	ENSG00000130935		ENSG00000164040	ENSG00000105726	ENSG00000135905				ENSG00000124357	ENSG00000179639	ENSG00000155629	ENSG00000135241		ENSG00000173120
ENSG00000149212	ENSG00000159753	ENSG00000165502	ENSG00000143549	ENSG00000138166	ENSG00000116044	ENSG00000184470	ENSG00000211899	ENSG00000168421	ENSG00000152495	ENSG00000123124	ENSG00000089351	ENSG00000153234	ENSG00000103811	ENSG00000131871	ENSG00000038358	ENSG00000113448	ENSG00000166128	ENSG00000185728	ENSG00000185728		ENSG00000177426	ENSG00000099992	ENSG00000139112				ENSG00000221743	ENSG00000222328	ENSG00000104324	ENSG00000124762		ENSG00000143546
ENSG00000170852	ENSG00000186918	ENSG00000211675	ENSG00000089327	ENSG00000134294	ENSG00000139636	ENSG00000122515	ENSG00000112695	ENSG00000111775	ENSG00000174579	ENSG00000164609	ENSG00000087087	ENSG00000140743	ENSG00000110719	ENSG00000173120	ENSG00000184436	ENSG00000005339	ENSG00000223244	ENSG00000183484	ENSG00000183484		ENSG00000139722	ENSG00000255026	ENSG00000244462				ENSG00000066336	ENSG00000111885	ENSG00000167325	ENSG00000166927		ENSG00000163597
ENSG00000106003	ENSG00000160796	ENSG00000149925	ENSG00000175061	ENSG00000140564	ENSG00000005483	ENSG00000007392	ENSG00000152082	ENSG00000080824	ENSG00000204316	ENSG00000116752	ENSG00000146425	ENSG00000133773	ENSG00000211938	ENSG00000110719	ENSG00000169499	ENSG00000142178	ENSG00000184602	ENSG00000171488	ENSG00000171488		ENSG00000144802	ENSG00000077044	ENSG00000055483				ENSG00000173465	ENSG00000155629	ENSG00000211974	ENSG00000162747		ENSG00000232956
ENSG00000101695	ENSG00000054118	ENSG00000213442	ENSG00000092199	ENSG00000121749	ENSG00000140983	ENSG00000111641	ENSG00000126756	ENSG00000015479	ENSG00000078589	ENSG00000111011	ENSG00000198408	ENSG00000183684	ENSG00000141582	ENSG00000211938	ENSG00000134186	ENSG00000187741	ENSG00000264211	ENSG00000137770	ENSG00000137770		ENSG00000196756	ENSG00000251562	ENSG00000171456				ENSG00000213689	ENSG00000167325	ENSG00000129757	ENSG00000125898		ENSG00000138069
ENSG00000163811	ENSG00000132716	ENSG00000136167	ENSG00000158710	ENSG00000137841	ENSG00000100644	ENSG00000077150	ENSG00000158050	ENSG00000128016	ENSG00000003756	ENSG00000163788	ENSG00000141506	ENSG00000182087	ENSG00000025708	ENSG00000141582	ENSG00000112149	ENSG00000101445	ENSG00000258352	ENSG00000163635	ENSG00000163635		ENSG00000135070	ENSG00000103257	ENSG00000134294				ENSG00000211965	ENSG00000182534	ENSG00000240834	ENSG00000182578		ENSG00000068697
ENSG00000069667	ENSG00000164466	ENSG00000147168	ENSG00000227097	ENSG00000196187	ENSG00000252061	ENSG00000170525	ENSG00000076662	ENSG00000211899	ENSG00000215788	ENSG00000141551	ENSG00000162231	ENSG00000243290	ENSG00000258017	ENSG00000025708	ENSG00000138834	ENSG00000173846	ENSG00000187118	ENSG00000227671	ENSG00000227671		ENSG00000135905	ENSG00000266714	ENSG00000140564				ENSG00000160209	ENSG00000211974	ENSG00000228716	ENSG00000127951		ENSG00000211938
ENSG00000138433	ENSG00000115548	ENSG00000211459	ENSG00000203875	ENSG00000198218	ENSG00000067334	ENSG00000064687	ENSG00000164346	ENSG00000164104	ENSG00000109920	ENSG00000100813	ENSG00000133226	ENSG00000007168	ENSG00000183508	ENSG00000258017	ENSG00000167470	ENSG00000008128	ENSG00000164463	ENSG00000111711	ENSG00000111711		ENSG00000064012	ENSG00000092931	ENSG00000076108				ENSG00000113368	ENSG00000129757	ENSG00000196975	ENSG00000126368		ENSG00000141582
ENSG00000099992	ENSG00000080371	ENSG00000197111	ENSG00000220842	ENSG00000155307	ENSG00000164040	ENSG00000164880	ENSG00000136732	ENSG00000112695	ENSG00000104880	ENSG00000139146	ENSG00000103342	ENSG00000129518	ENSG00000132823	ENSG00000183508	ENSG00000221743	ENSG00000105205	ENSG00000162496	ENSG00000131043	ENSG00000131043		ENSG00000139112	ENSG00000073169	ENSG00000121749				ENSG00000211611	ENSG00000240834	ENSG00000185745	ENSG00000124466		ENSG00000183508
ENSG00000076641	ENSG00000166128	ENSG00000196683	ENSG00000122566	ENSG00000172932	ENSG00000177426	ENSG00000185324	ENSG00000149823	ENSG00000152082	ENSG00000173120	ENSG00000161526	ENSG00000065413	ENSG00000120063	ENSG00000139278	ENSG00000132823	ENSG00000079313	ENSG00000170638	ENSG00000255198	ENSG00000164951	ENSG00000164951		ENSG00000055483	ENSG00000146067	ENSG00000196187				ENSG00000265558	ENSG00000228716	ENSG00000164611	ENSG00000100292		ENSG00000132823
ENSG00000103257	ENSG00000130254	ENSG00000143549	ENSG00000184640	ENSG00000114784	ENSG00000139722	ENSG00000119688	ENSG00000236552	ENSG00000126756	ENSG00000163597	ENSG00000122257	ENSG00000146083	ENSG00000211640	ENSG00000153066	ENSG00000139278	ENSG00000174953	ENSG00000179344	ENSG00000079332	ENSG00000107968	ENSG00000107968		ENSG00000171456	ENSG00000143924	ENSG00000271581				ENSG00000171848	ENSG00000196975	ENSG00000211639	ENSG00000147454		ENSG00000211945
ENSG00000143924	ENSG00000223244	ENSG00000089327	ENSG00000074800	ENSG00000131503	ENSG00000196756	ENSG00000147854	ENSG00000214389	ENSG00000211653	ENSG00000232956	ENSG00000242114	ENSG00000131669	ENSG00000107263	ENSG00000069849	ENSG00000153066	ENSG00000139718	ENSG00000221978	ENSG00000083168	ENSG00000134970	ENSG00000134970		ENSG00000134294	ENSG00000038358	ENSG00000198218				ENSG00000119917	ENSG00000185745	ENSG00000136250	ENSG00000167768		ENSG00000121579
ENSG00000141646	ENSG00000198089	ENSG00000175061	ENSG00000065978	ENSG00000151327	ENSG00000135070	ENSG00000102226	ENSG00000084070	ENSG00000158050	ENSG00000072110	ENSG00000205268	ENSG00000063978	ENSG00000187555	ENSG00000211945	ENSG00000211945	ENSG00000172977	ENSG00000158805	ENSG00000163659	ENSG00000170525	ENSG00000170525		ENSG00000140564	ENSG00000184436	ENSG00000109320				ENSG00000184470	ENSG00000164611	ENSG00000135114	ENSG00000139505		ENSG00000196396
ENSG00000184436	ENSG00000162496	ENSG00000092199	ENSG00000081237	ENSG00000005812	ENSG00000139112	ENSG00000101199	ENSG00000177410	ENSG00000076662	ENSG00000133316	ENSG00000086062	ENSG00000144655	ENSG00000075426	ENSG00000121579	ENSG00000121579	ENSG00000182541	ENSG00000185338	ENSG00000119950	ENSG00000167258	ENSG00000167258		ENSG00000076108	ENSG00000169499	ENSG00000155307				ENSG00000167851	ENSG00000211639	ENSG00000259261	ENSG00000160179		ENSG00000069399
ENSG00000169499	ENSG00000255198	ENSG00000247774	ENSG00000132465	ENSG00000072310	ENSG00000244462	ENSG00000155229	ENSG00000132819	ENSG00000103363	ENSG00000102760	ENSG00000160908	ENSG00000122085	ENSG00000177606	ENSG00000211746	ENSG00000211746	ENSG00000161204	ENSG00000159753	ENSG00000066654	ENSG00000131242	ENSG00000131242		ENSG00000121749	ENSG00000134186	ENSG00000157933				ENSG00000103490	ENSG00000136250	ENSG00000104738			ENSG00000176845
ENSG00000134186	ENSG00000173575	ENSG00000158710	ENSG00000111229	ENSG00000140400	ENSG00000055483	ENSG00000163516	ENSG00000078596	ENSG00000005022	ENSG00000141582	ENSG00000152495	ENSG00000109118	ENSG00000138767	ENSG00000069399	ENSG00000069399	ENSG00000153922	ENSG00000186918	ENSG00000161835	ENSG00000073861	ENSG00000073861		ENSG00000196187	ENSG00000112149	ENSG00000114784				ENSG00000134184	ENSG00000135114	ENSG00000223350			ENSG00000116044
ENSG00000112149	ENSG00000135164	ENSG00000227097	ENSG00000164924	ENSG00000259813	ENSG00000171456	ENSG00000116337	ENSG00000112081	ENSG00000164346	ENSG00000178971	ENSG00000174579	ENSG00000099331	ENSG00000204642	ENSG00000176845	ENSG00000176845	ENSG00000104517	ENSG00000054118	ENSG00000165782	ENSG00000108256	ENSG00000108256		ENSG00000271581	ENSG00000138834	ENSG00000131503				ENSG00000107968	ENSG00000259261	ENSG00000150687			ENSG00000245904
ENSG00000138834	ENSG00000145191	ENSG00000203875	ENSG00000122862	ENSG00000109606	ENSG00000138166	ENSG00000197989	ENSG00000230903	ENSG00000168653	ENSG00000234617	ENSG00000078589	ENSG00000067064	ENSG00000178562	ENSG00000177426	ENSG00000105287	ENSG00000109929	ENSG00000132716	ENSG00000111615	ENSG00000124151	ENSG00000124151		ENSG00000198218	ENSG00000116604	ENSG00000151327				ENSG00000257923	ENSG00000104738	ENSG00000167173			ENSG00000100644
ENSG00000116604	ENSG00000076924	ENSG00000220842	ENSG00000135390	ENSG00000105397	ENSG00000134294	ENSG00000161638	ENSG00000159388	ENSG00000214389	ENSG00000132823	ENSG00000003756	ENSG00000015133	ENSG00000116754	ENSG00000222041	ENSG00000252061	ENSG00000129933	ENSG00000164466	ENSG00000116717	ENSG00000114439	ENSG00000114439		ENSG00000109320	ENSG00000146834	ENSG00000005812				ENSG00000103051	ENSG00000223350	ENSG00000175040			ENSG00000252061
ENSG00000146834	ENSG00000100441	ENSG00000122566	ENSG00000130755	ENSG00000147162	ENSG00000140564	ENSG00000058600	ENSG00000211949	ENSG00000084070	ENSG00000142102	ENSG00000215788	ENSG00000165943	ENSG00000160888	ENSG00000100297	ENSG00000177426	ENSG00000197912	ENSG00000115548	ENSG00000149212	ENSG00000169826	ENSG00000169826		ENSG00000155307	ENSG00000027697	ENSG00000100422				ENSG00000126759	ENSG00000150687	ENSG00000108798			ENSG00000177426
ENSG00000027697	ENSG00000054267	ENSG00000184640	ENSG00000167286	ENSG00000091592	ENSG00000121749	ENSG00000169710	ENSG00000243466	ENSG00000177410	ENSG00000069399	ENSG00000109920	ENSG00000011243	ENSG00000243238	ENSG00000168255	ENSG00000222041	ENSG00000108963	ENSG00000243264	ENSG00000170852	ENSG00000255819	ENSG00000255819		ENSG00000157933	ENSG00000167470	ENSG00000072310				ENSG00000100364	ENSG00000167173	ENSG00000169896			ENSG00000222041
ENSG00000144048	ENSG00000136271	ENSG00000074800	ENSG00000101608	ENSG00000120705	ENSG00000196187	ENSG00000186810	ENSG00000150459	ENSG00000132819	ENSG00000168036	ENSG00000104880	ENSG00000182179	ENSG00000147533	ENSG00000205336	ENSG00000100297	ENSG00000109046	ENSG00000166128	ENSG00000101695	ENSG00000065457	ENSG00000065457		ENSG00000172932	ENSG00000221743	ENSG00000109606				ENSG00000135677	ENSG00000175040	ENSG00000121964			ENSG00000159674
ENSG00000167470	ENSG00000163659	ENSG00000065978	ENSG00000142669	ENSG00000137947	ENSG00000172845	ENSG00000116852	ENSG00000110448	ENSG00000136888	ENSG00000176845	ENSG00000173120	ENSG00000099917	ENSG00000055044	ENSG00000138166	ENSG00000205336	ENSG00000100401	ENSG00000198089	ENSG00000163811	ENSG00000048405	ENSG00000048405		ENSG00000114784	ENSG00000079313	ENSG00000113580				ENSG00000186810	ENSG00000108798	ENSG00000211780			ENSG00000136950
ENSG00000213079	ENSG00000245532	ENSG00000081237	ENSG00000198830	ENSG00000139620	ENSG00000198218	ENSG00000099821	ENSG00000170989	ENSG00000077984	ENSG00000168056	ENSG00000163597	ENSG00000162783	ENSG00000105856	ENSG00000140564	ENSG00000138166	ENSG00000161904	ENSG00000162496	ENSG00000138381	ENSG00000163874	ENSG00000163874		ENSG00000131503	ENSG00000174953	ENSG00000091592				ENSG00000137486	ENSG00000169896	ENSG00000101336			ENSG00000198961
ENSG00000079313	ENSG00000119950	ENSG00000133639	ENSG00000160932	ENSG00000115306	ENSG00000109320	ENSG00000140688	ENSG00000120129	ENSG00000265401	ENSG00000071054	ENSG00000232956	ENSG00000166669	ENSG00000170476	ENSG00000135334	ENSG00000135334	ENSG00000104859	ENSG00000255198	ENSG00000069667	ENSG00000069702	ENSG00000069702		ENSG00000151327	ENSG00000139718	ENSG00000213782				ENSG00000069702	ENSG00000121964	ENSG00000149577			ENSG00000205336
ENSG00000168264	ENSG00000161835	ENSG00000111229	ENSG00000092010	ENSG00000129460	ENSG00000155307	ENSG00000077235	ENSG00000211598	ENSG00000078596	ENSG00000155926	ENSG00000135655	ENSG00000116752	ENSG00000171867	ENSG00000206341	ENSG00000206341	ENSG00000171634	ENSG00000173575	ENSG00000164758	ENSG00000006634	ENSG00000006634		ENSG00000005812	ENSG00000161204	ENSG00000120705				ENSG00000126458	ENSG00000101336	ENSG00000150045			ENSG00000138166
ENSG00000174953	ENSG00000136878	ENSG00000164924	ENSG00000125743	ENSG00000135048	ENSG00000172932	ENSG00000132017	ENSG00000119801	ENSG00000112081	ENSG00000116044	ENSG00000072110	ENSG00000111011	ENSG00000127152	ENSG00000198833	ENSG00000198833	ENSG00000119707	ENSG00000135164	ENSG00000138433	ENSG00000215251	ENSG00000215251		ENSG00000100422	ENSG00000153922	ENSG00000185905				ENSG00000055332	ENSG00000105963	ENSG00000110057			ENSG00000140564
ENSG00000139718	ENSG00000165782	ENSG00000122862	ENSG00000269888	ENSG00000117523	ENSG00000114784	ENSG00000140829	ENSG00000198843	ENSG00000230903	ENSG00000139636	ENSG00000133316	ENSG00000163788	ENSG00000213639	ENSG00000090520	ENSG00000090520	ENSG00000070495	ENSG00000145191	ENSG00000076641	ENSG00000185658	ENSG00000185658		ENSG00000072310	ENSG00000109929	ENSG00000137947				ENSG00000196961	ENSG00000149577	ENSG00000089692			ENSG00000198833
ENSG00000182541	ENSG00000163600	ENSG00000135390	ENSG00000266751	ENSG00000140455	ENSG00000178381	ENSG00000164828	ENSG00000171490	ENSG00000078304	ENSG00000245904	ENSG00000102760	ENSG00000141551	ENSG00000114861	ENSG00000137841	ENSG00000137841	ENSG00000183484	ENSG00000136270	ENSG00000103257	ENSG00000101544	ENSG00000101544		ENSG00000127603	ENSG00000108963	ENSG00000139620				ENSG00000004468	ENSG00000150045	ENSG00000211650			ENSG00000273275
ENSG00000161204	ENSG00000134899	ENSG00000130755	ENSG00000104894	ENSG00000168071	ENSG00000131503	ENSG00000121716	ENSG00000213178	ENSG00000159388	ENSG00000005483	ENSG00000141582	ENSG00000100813	ENSG00000146425	ENSG00000231475	ENSG00000231475	ENSG00000136699	ENSG00000076924	ENSG00000115816	ENSG00000157837	ENSG00000157837		ENSG00000140400	ENSG00000270075	ENSG00000115306				ENSG00000202198	ENSG00000110057	ENSG00000124588			ENSG00000143753
ENSG00000153922	ENSG00000116717	ENSG00000152558	ENSG00000147065	ENSG00000113448	ENSG00000151327	ENSG00000160305	ENSG00000067167	ENSG00000147684	ENSG00000140983	ENSG00000178971	ENSG00000161526	ENSG00000198408	ENSG00000101160	ENSG00000211649	ENSG00000128159	ENSG00000100441	ENSG00000127870	ENSG00000067596	ENSG00000067596		ENSG00000259813	ENSG00000156232	ENSG00000204287				ENSG00000211782	ENSG00000089692	ENSG00000085265			ENSG00000231475
ENSG00000109929	ENSG00000106003	ENSG00000167286	ENSG00000163041	ENSG00000005339	ENSG00000005812	ENSG00000158545	ENSG00000092820	ENSG00000125835	ENSG00000048740	ENSG00000234617	ENSG00000122257	ENSG00000141506	ENSG00000198502	ENSG00000101782	ENSG00000265558	ENSG00000054267	ENSG00000141646	ENSG00000083520	ENSG00000083520		ENSG00000109606	ENSG00000104859	ENSG00000129460				ENSG00000211658	ENSG00000211650	ENSG00000196735			ENSG00000198502
ENSG00000165355	ENSG00000101695	ENSG00000101608	ENSG00000137970	ENSG00000142178	ENSG00000072310	ENSG00000064932	ENSG00000111276	ENSG00000188612	ENSG00000100644	ENSG00000183508	ENSG00000242114	ENSG00000162231	ENSG00000211649	ENSG00000211637	ENSG00000144711	ENSG00000136271	ENSG00000169499	ENSG00000095574	ENSG00000095574		ENSG00000105397	ENSG00000070495	ENSG00000135048				ENSG00000135362	ENSG00000124588	ENSG00000124762			ENSG00000211649
ENSG00000270075	ENSG00000069667	ENSG00000218426	ENSG00000130592	ENSG00000179912	ENSG00000140400	ENSG00000130810	ENSG00000269926	ENSG00000211949	ENSG00000252061	ENSG00000132823	ENSG00000086062	ENSG00000133226	ENSG00000101782	ENSG00000188229	ENSG00000163635	ENSG00000163659	ENSG00000112149	ENSG00000155304	ENSG00000155304		ENSG00000147162	ENSG00000183484	ENSG00000117523				ENSG00000176393	ENSG00000085265	ENSG00000166927			ENSG00000114784
ENSG00000254682	ENSG00000105726	ENSG00000142669	ENSG00000188243	ENSG00000187741	ENSG00000147162	ENSG00000147813	ENSG00000104979	ENSG00000243466	ENSG00000164040	ENSG00000142102	ENSG00000160908	ENSG00000103342	ENSG00000107485	ENSG00000101439	ENSG00000184470	ENSG00000245532	ENSG00000115520	ENSG00000056586	ENSG00000056586		ENSG00000113580	ENSG00000128159	ENSG00000105835				ENSG00000196141	ENSG00000166927	ENSG00000162747			ENSG00000178381
ENSG00000197329	ENSG00000138433	ENSG00000198830	ENSG00000178982	ENSG00000101445	ENSG00000113580	ENSG00000196365	ENSG00000125347	ENSG00000150459	ENSG00000177426	ENSG00000069399	ENSG00000174579	ENSG00000148337	ENSG00000115677	ENSG00000105879	ENSG00000160307	ENSG00000161835	ENSG00000116604	ENSG00000101654	ENSG00000101654		ENSG00000091592	ENSG00000265558	ENSG00000122299				ENSG00000075234	ENSG00000162747	ENSG00000088992			ENSG00000211637
ENSG00000156232	ENSG00000099992	ENSG00000092010	ENSG00000160014	ENSG00000137955	ENSG00000091592	ENSG00000132382	ENSG00000044574	ENSG00000110448	ENSG00000139722	ENSG00000168036	ENSG00000134107	ENSG00000065413	ENSG00000211637	ENSG00000128228	ENSG00000105325	ENSG00000136878	ENSG00000255569	ENSG00000112182	ENSG00000112182		ENSG00000120705	ENSG00000144711	ENSG00000140455				ENSG00000197766	ENSG00000088992	ENSG00000169583			ENSG00000060138
ENSG00000104859	ENSG00000255026	ENSG00000125743	ENSG00000147677	ENSG00000155287	ENSG00000213782	ENSG00000102225	ENSG00000020633	ENSG00000170989	ENSG00000132155	ENSG00000176845	ENSG00000104419	ENSG00000131669	ENSG00000188229	ENSG00000130589	ENSG00000092148	ENSG00000165782	ENSG00000146834	ENSG00000121350	ENSG00000121350		ENSG00000185905	ENSG00000100109	ENSG00000113448				ENSG00000179639	ENSG00000135604	ENSG00000135604			ENSG00000128989
ENSG00000070495	ENSG00000077044	ENSG00000269888	ENSG00000156467	ENSG00000173846	ENSG00000120705	ENSG00000100949	ENSG00000081320	ENSG00000120129	ENSG00000144802	ENSG00000071054	ENSG00000078589	ENSG00000189241	ENSG00000101439	ENSG00000139620	ENSG00000007392	ENSG00000163600	ENSG00000027697	ENSG00000101665	ENSG00000101665		ENSG00000139620	ENSG00000163635	ENSG00000005339				ENSG00000222328	ENSG00000125898	ENSG00000125898			ENSG00000137947
ENSG00000183484	ENSG00000076641	ENSG00000266751	ENSG00000213402	ENSG00000105639	ENSG00000155849	ENSG00000114650	ENSG00000232112	ENSG00000211598	ENSG00000165732	ENSG00000155926	ENSG00000003756	ENSG00000063978	ENSG00000105879	ENSG00000239855	ENSG00000077150	ENSG00000116717	ENSG00000144048	ENSG00000100532	ENSG00000100532		ENSG00000115306	ENSG00000184470	ENSG00000142178				ENSG00000163319	ENSG00000111328	ENSG00000111328			ENSG00000176624
ENSG00000125772	ENSG00000251562	ENSG00000104894	ENSG00000115523	ENSG00000008128	ENSG00000185905	ENSG00000085978	ENSG00000105329	ENSG00000119801	ENSG00000196756	ENSG00000116044	ENSG00000215788	ENSG00000144655	ENSG00000130589	ENSG00000142178	ENSG00000170525	ENSG00000211638	ENSG00000167470	ENSG00000056558	ENSG00000056558		ENSG00000204287	ENSG00000105325	ENSG00000179912				ENSG00000111885	ENSG00000263934	ENSG00000263934			ENSG00000139620
ENSG00000265558	ENSG00000103257	ENSG00000147065	ENSG00000163466	ENSG00000105205	ENSG00000137947	ENSG00000120694	ENSG00000215301	ENSG00000127540	ENSG00000135070	ENSG00000139636	ENSG00000109920	ENSG00000121864	ENSG00000169756	ENSG00000119403	ENSG00000064687	ENSG00000106003	ENSG00000213079	ENSG00000121879	ENSG00000121879		ENSG00000129460	ENSG00000007392	ENSG00000104765				ENSG00000155629	ENSG00000182578	ENSG00000182578			ENSG00000204287
ENSG00000100109	ENSG00000266714	ENSG00000163041	ENSG00000239951	ENSG00000065675	ENSG00000139620	ENSG00000089060	ENSG00000010610	ENSG00000198843	ENSG00000135905	ENSG00000245904	ENSG00000104880	ENSG00000122085	ENSG00000139620	ENSG00000101445	ENSG00000185324	ENSG00000101695	ENSG00000168264	ENSG00000154310	ENSG00000154310		ENSG00000135048	ENSG00000164951	ENSG00000101445				ENSG00000188820	ENSG00000211942	ENSG00000211942			ENSG00000134539
ENSG00000163635	ENSG00000073169	ENSG00000112576	ENSG00000026508	ENSG00000221978	ENSG00000115306	ENSG00000141258	ENSG00000177105	ENSG00000171490	ENSG00000064012	ENSG00000005483	ENSG00000173120	ENSG00000109118	ENSG00000239855	ENSG00000130775	ENSG00000005007	ENSG00000105726	ENSG00000139718	ENSG00000139190	ENSG00000139190		ENSG00000117523	ENSG00000107968	ENSG00000165516				ENSG00000104324	ENSG00000127951	ENSG00000127951			ENSG00000239855
ENSG00000112297	ENSG00000158773	ENSG00000137970	ENSG00000211666	ENSG00000158805	ENSG00000129460	ENSG00000092094	ENSG00000179010	ENSG00000067167	ENSG00000139112	ENSG00000140983	ENSG00000232956	ENSG00000099331	ENSG00000142178	ENSG00000169018	ENSG00000166233	ENSG00000138433	ENSG00000147050	ENSG00000235872	ENSG00000235872		ENSG00000105835	ENSG00000099985	ENSG00000173846				ENSG00000229474	ENSG00000269900	ENSG00000269900			ENSG00000105835
ENSG00000178974	ENSG00000146067	ENSG00000130592	ENSG00000105202	ENSG00000108848	ENSG00000135048	ENSG00000242802	ENSG00000120742	ENSG00000092820	ENSG00000227766	ENSG00000048740	ENSG00000138069	ENSG00000211940	ENSG00000119403	ENSG00000105205	ENSG00000075856	ENSG00000099992	ENSG00000153922	ENSG00000136932	ENSG00000136932		ENSG00000122299	ENSG00000077150	ENSG00000008128				ENSG00000167325	ENSG00000100292	ENSG00000100292			ENSG00000140455
ENSG00000105325	ENSG00000143924	ENSG00000096384	ENSG00000165119	ENSG00000137817	ENSG00000117523	ENSG00000166507	ENSG00000232573	ENSG00000111276	ENSG00000244462	ENSG00000100644	ENSG00000110719	ENSG00000067064	ENSG00000101445	ENSG00000198937	ENSG00000147854	ENSG00000255026	ENSG00000115540	ENSG00000123595	ENSG00000123595		ENSG00000140455	ENSG00000170525	ENSG00000105205				ENSG00000211974	ENSG00000123358	ENSG00000211670			ENSG00000142178
ENSG00000164944	ENSG00000141646	ENSG00000188243	ENSG00000051523	ENSG00000159753	ENSG00000122299	ENSG00000178199	ENSG00000105323	ENSG00000269926	ENSG00000055483	ENSG00000252061	ENSG00000135655	ENSG00000015133	ENSG00000130775	ENSG00000211964	ENSG00000102226	ENSG00000077044	ENSG00000109929	ENSG00000179456	ENSG00000179456		ENSG00000113448	ENSG00000064687	ENSG00000143337				ENSG00000134321	ENSG00000169554	ENSG00000167768			ENSG00000144566
ENSG00000207547	ENSG00000038358	ENSG00000178982	ENSG00000175390	ENSG00000186918	ENSG00000140455	ENSG00000183020	ENSG00000115165	ENSG00000235655	ENSG00000171456	ENSG00000176390	ENSG00000133316	ENSG00000165943	ENSG00000169018	ENSG00000160796	ENSG00000101199	ENSG00000251562	ENSG00000116731	ENSG00000183813	ENSG00000183813		ENSG00000005339	ENSG00000185324	ENSG00000179344				ENSG00000129757	ENSG00000211670				ENSG00000169018
ENSG00000164951	ENSG00000184436	ENSG00000160014	ENSG00000107223	ENSG00000160796	ENSG00000113448	ENSG00000120733	ENSG00000090238	ENSG00000150093	ENSG00000138166	ENSG00000067334	ENSG00000102760	ENSG00000011243	ENSG00000105205	ENSG00000171476	ENSG00000182095	ENSG00000125447	ENSG00000165355	ENSG00000089818	ENSG00000089818		ENSG00000142178	ENSG00000005007	ENSG00000221978				ENSG00000100721	ENSG00000167768				ENSG00000105205
ENSG00000077150	ENSG00000169499	ENSG00000147677	ENSG00000067560	ENSG00000054118	ENSG00000005339	ENSG00000197766	ENSG00000136819	ENSG00000211644	ENSG00000134294	ENSG00000164040	ENSG00000141582	ENSG00000099917	ENSG00000198937	ENSG00000109519	ENSG00000144749	ENSG00000103257	ENSG00000059758	ENSG00000229474	ENSG00000229474		ENSG00000179912	ENSG00000166233	ENSG00000158805				ENSG00000240834					ENSG00000143337
ENSG00000170525	ENSG00000134186	ENSG00000156467	ENSG00000126264	ENSG00000138398	ENSG00000142178	ENSG00000179639	ENSG00000099995	ENSG00000104979	ENSG00000140564	ENSG00000177426	ENSG00000178971	ENSG00000162783	ENSG00000211964	ENSG00000240671	ENSG00000118482	ENSG00000266714	ENSG00000270075	ENSG00000271941	ENSG00000271941		ENSG00000187741	ENSG00000131242	ENSG00000196498				ENSG00000228716					ENSG00000179344
ENSG00000005007	ENSG00000112149	ENSG00000213402	ENSG00000160255	ENSG00000132716	ENSG00000179912	ENSG00000101665	ENSG00000120727	ENSG00000125347	ENSG00000076108	ENSG00000139722	ENSG00000234617	ENSG00000166669	ENSG00000179344	ENSG00000241294	ENSG00000008710	ENSG00000092931	ENSG00000254682	ENSG00000182534	ENSG00000182534		ENSG00000101445	ENSG00000075856	ENSG00000186918				ENSG00000196975					ENSG00000007264
ENSG00000166233	ENSG00000138834	ENSG00000163466	ENSG00000130429	ENSG00000101901	ENSG00000187741	ENSG00000221792	ENSG00000145675	ENSG00000044574	ENSG00000121749	ENSG00000165732	ENSG00000160271	ENSG00000164609	ENSG00000186480	ENSG00000243264	ENSG00000116337	ENSG00000073169	ENSG00000197329	ENSG00000166747	ENSG00000166747		ENSG00000165516	ENSG00000147854	ENSG00000054118				ENSG00000185745					ENSG00000221823
ENSG00000131242	ENSG00000132300	ENSG00000234287	ENSG00000234797	ENSG00000198837	ENSG00000101445	ENSG00000174227	ENSG00000177733	ENSG00000020633	ENSG00000196187	ENSG00000196756	ENSG00000183508	ENSG00000116752	ENSG00000160796	ENSG00000172216	ENSG00000197989	ENSG00000158773	ENSG00000130803	ENSG00000124788	ENSG00000124788		ENSG00000173846	ENSG00000102226	ENSG00000101901				ENSG00000164611					ENSG00000185338
ENSG00000075856	ENSG00000116604	ENSG00000239951	ENSG00000163479	ENSG00000115548	ENSG00000155287	ENSG00000141994	ENSG00000100138	ENSG00000081320	ENSG00000129925	ENSG00000051620	ENSG00000132823	ENSG00000166200	ENSG00000171476	ENSG00000079616	ENSG00000163874	ENSG00000146067	ENSG00000185728	ENSG00000148572	ENSG00000148572		ENSG00000105639	ENSG00000101199	ENSG00000164466				ENSG00000136250					ENSG00000215717
ENSG00000147854	ENSG00000146834	ENSG00000026508	ENSG00000175567	ENSG00000080371	ENSG00000173846	ENSG00000197763	ENSG00000071073	ENSG00000241351	ENSG00000198218	ENSG00000135070	ENSG00000153066	ENSG00000111011	ENSG00000254087	ENSG00000026103	ENSG00000163050	ENSG00000143924	ENSG00000134480	ENSG00000166046	ENSG00000166046		ENSG00000008128	ENSG00000182095	ENSG00000115548				ENSG00000135114					ENSG00000152818
ENSG00000102226	ENSG00000027697	ENSG00000211666	ENSG00000103187	ENSG00000034677	ENSG00000144566	ENSG00000125124	ENSG00000169976	ENSG00000232112	ENSG00000109320	ENSG00000135905	ENSG00000142102	ENSG00000163788	ENSG00000000938	ENSG00000187118	ENSG00000058600	ENSG00000141646	ENSG00000070495	ENSG00000176095	ENSG00000176095		ENSG00000105205	ENSG00000144749	ENSG00000080371				ENSG00000259261					ENSG00000171476
ENSG00000123066	ENSG00000167470	ENSG00000105202	ENSG00000118680	ENSG00000166128	ENSG00000105205	ENSG00000113504	ENSG00000172349	ENSG00000105329	ENSG00000197457	ENSG00000111266	ENSG00000121579	ENSG00000141551	ENSG00000240671	ENSG00000164463	ENSG00000169710	ENSG00000038358	ENSG00000183484	ENSG00000107362	ENSG00000107362		ENSG00000170638	ENSG00000118482	ENSG00000131634				ENSG00000104738					ENSG00000254087
ENSG00000182095	ENSG00000213079	ENSG00000165119	ENSG00000115053	ENSG00000130254	ENSG00000065675	ENSG00000239857	ENSG00000211747	ENSG00000215301	ENSG00000166313	ENSG00000139112	ENSG00000069399	ENSG00000100813	ENSG00000241294	ENSG00000170340	ENSG00000134744	ENSG00000184436	ENSG00000125772	ENSG00000114796	ENSG00000114796		ENSG00000179344	ENSG00000116337	ENSG00000034677				ENSG00000223350					ENSG00000090382
ENSG00000144749	ENSG00000079313	ENSG00000051523	ENSG00000198668	ENSG00000223244	ENSG00000143337	ENSG00000172046	ENSG00000059804	ENSG00000205246	ENSG00000155307	ENSG00000227766	ENSG00000168036	ENSG00000139146	ENSG00000243264	ENSG00000257242	ENSG00000077235	ENSG00000169499	ENSG00000171488	ENSG00000090432	ENSG00000090432		ENSG00000221978	ENSG00000197989	ENSG00000166128				ENSG00000245954					ENSG00000109519
ENSG00000118482	ENSG00000168264	ENSG00000175390	ENSG00000169567	ENSG00000198089	ENSG00000008952	ENSG00000059122	ENSG00000127824	ENSG00000177105	ENSG00000157933	ENSG00000244462	ENSG00000176845	ENSG00000161526	ENSG00000172216	ENSG00000211669	ENSG00000105127	ENSG00000134186	ENSG00000137770	ENSG00000147138	ENSG00000147138		ENSG00000158805	ENSG00000163874	ENSG00000130254				ENSG00000150687					ENSG00000240671
ENSG00000197989	ENSG00000174953	ENSG00000107223	ENSG00000228474	ENSG00000121310	ENSG00000221978	ENSG00000198952	ENSG00000185883	ENSG00000179010	ENSG00000172932	ENSG00000055483	ENSG00000168056	ENSG00000122257	ENSG00000079616	ENSG00000087074	ENSG00000140829	ENSG00000112149	ENSG00000100109	ENSG00000168092	ENSG00000168092		ENSG00000108848	ENSG00000163050	ENSG00000223244				ENSG00000167173					ENSG00000080371
ENSG00000163874	ENSG00000139718	ENSG00000067560	ENSG00000113558	ENSG00000162496	ENSG00000158805	ENSG00000100425	ENSG00000173726	ENSG00000120742	ENSG00000114784	ENSG00000138166	ENSG00000071054	ENSG00000242114	ENSG00000026103	ENSG00000129277	ENSG00000164828	ENSG00000138834	ENSG00000163635	ENSG00000137502	ENSG00000137502		ENSG00000196498	ENSG00000058600	ENSG00000184602				ENSG00000175040					ENSG00000235398
ENSG00000163050	ENSG00000182541	ENSG00000169714	ENSG00000166794	ENSG00000255198	ENSG00000108848	ENSG00000146826	ENSG00000198832	ENSG00000105323	ENSG00000131503	ENSG00000134294	ENSG00000155926	ENSG00000086062	ENSG00000187118	ENSG00000181036	ENSG00000153207	ENSG00000116604	ENSG00000112297	ENSG00000108094	ENSG00000108094		ENSG00000159753	ENSG00000169710	ENSG00000162496				ENSG00000108798					ENSG00000158615
ENSG00000058600	ENSG00000161204	ENSG00000126264	ENSG00000064666	ENSG00000173575	ENSG00000145860	ENSG00000089154	ENSG00000266192	ENSG00000106803	ENSG00000151327	ENSG00000140564	ENSG00000061938	ENSG00000160908	ENSG00000164463	ENSG00000163659	ENSG00000158545	ENSG00000146834	ENSG00000111711	ENSG00000145349	ENSG00000145349		ENSG00000186918	ENSG00000186810	ENSG00000255198				ENSG00000169896					ENSG00000028839
ENSG00000169710	ENSG00000153922	ENSG00000160255	ENSG00000063046	ENSG00000135164	ENSG00000137817	ENSG00000130787	ENSG00000113013	ENSG00000115165	ENSG00000005812	ENSG00000188739	ENSG00000116044	ENSG00000174579	ENSG00000170340	ENSG00000145220	ENSG00000064932	ENSG00000027697	ENSG00000131043	ENSG00000175197	ENSG00000175197		ENSG00000160796	ENSG00000134744	ENSG00000173575				ENSG00000121964					ENSG00000172216
ENSG00000186810	ENSG00000109929	ENSG00000130429	ENSG00000243678	ENSG00000076924	ENSG00000159753	ENSG00000125245	ENSG00000169508	ENSG00000115875	ENSG00000072310	ENSG00000182957	ENSG00000139636	ENSG00000134107	ENSG00000211669	ENSG00000164902	ENSG00000130810	ENSG00000167470	ENSG00000178974	ENSG00000198382	ENSG00000198382		ENSG00000054118	ENSG00000077235	ENSG00000135164				ENSG00000211780					ENSG00000166128
ENSG00000134744	ENSG00000116731	ENSG00000234797	ENSG00000170296	ENSG00000100441	ENSG00000110075	ENSG00000104957	ENSG00000090104	ENSG00000136819	ENSG00000198520	ENSG00000076108	ENSG00000005483	ENSG00000104419	ENSG00000087074	ENSG00000211685	ENSG00000196365	ENSG00000079313	ENSG00000164944	ENSG00000150687	ENSG00000150687		ENSG00000138398	ENSG00000105127	ENSG00000076924				ENSG00000101336					ENSG00000164751
ENSG00000077235	ENSG00000100429	ENSG00000163479	ENSG00000132507	ENSG00000083168	ENSG00000186918	ENSG00000113240	ENSG00000173272	ENSG00000255302	ENSG00000140400	ENSG00000121749	ENSG00000140983	ENSG00000078589	ENSG00000129277	ENSG00000138018	ENSG00000102225	ENSG00000168264	ENSG00000164951	ENSG00000124688	ENSG00000124688		ENSG00000120948	ENSG00000140829	ENSG00000100441				ENSG00000149577					ENSG00000184602
ENSG00000105127	ENSG00000165355	ENSG00000175567	ENSG00000185624	ENSG00000054267	ENSG00000160796	ENSG00000176248	ENSG00000151366	ENSG00000099995	ENSG00000259813	ENSG00000196187	ENSG00000048740	ENSG00000003756	ENSG00000128245	ENSG00000163600	ENSG00000100949	ENSG00000174953	ENSG00000107968	ENSG00000104671	ENSG00000104671		ENSG00000132716	ENSG00000153207	ENSG00000083168				ENSG00000150045					ENSG00000026103
ENSG00000140829	ENSG00000129933	ENSG00000103187	ENSG00000183291	ENSG00000136271	ENSG00000054118	ENSG00000266402	ENSG00000082153	ENSG00000170348	ENSG00000109606	ENSG00000172845	ENSG00000100644	ENSG00000215788	ENSG00000181036	ENSG00000163564	ENSG00000085978	ENSG00000139718	ENSG00000134970	ENSG00000129315	ENSG00000129315		ENSG00000101901	ENSG00000158545	ENSG00000054267				ENSG00000110057					ENSG00000164463
ENSG00000124160	ENSG00000108963	ENSG00000118680	ENSG00000161960	ENSG00000163659	ENSG00000138398	ENSG00000138074	ENSG00000168209	ENSG00000116560	ENSG00000147162	ENSG00000198218	ENSG00000252061	ENSG00000109920	ENSG00000163659	ENSG00000211936	ENSG00000089060	ENSG00000182541	ENSG00000170525	ENSG00000169896	ENSG00000169896		ENSG00000164466	ENSG00000006634	ENSG00000136271				ENSG00000089692					ENSG00000170340
ENSG00000153207	ENSG00000270075	ENSG00000198668	ENSG00000180353	ENSG00000245532	ENSG00000101901	ENSG00000167548	ENSG00000168003	ENSG00000120727	ENSG00000113580	ENSG00000109320	ENSG00000067334	ENSG00000104880	ENSG00000145220	ENSG00000129235	ENSG00000109917	ENSG00000161204	ENSG00000167258	ENSG00000197860	ENSG00000197860		ENSG00000198837	ENSG00000064932	ENSG00000163659				ENSG00000124588					ENSG00000257242
ENSG00000006634	ENSG00000156232	ENSG00000169567	ENSG00000143119	ENSG00000119950	ENSG00000198837	ENSG00000198925	ENSG00000137876	ENSG00000145675	ENSG00000091592	ENSG00000166313	ENSG00000164040	ENSG00000173120	ENSG00000164902	ENSG00000211638	ENSG00000242802	ENSG00000153922	ENSG00000166233	ENSG00000121964	ENSG00000121964		ENSG00000115548	ENSG00000130810	ENSG00000119950				ENSG00000085265					ENSG00000162496
ENSG00000064932	ENSG00000130935	ENSG00000230629	ENSG00000114353	ENSG00000066654	ENSG00000115548	ENSG00000077458	ENSG00000164091	ENSG00000083799	ENSG00000213782	ENSG00000155307	ENSG00000177426	ENSG00000163597	ENSG00000211685	ENSG00000170852	ENSG00000166507	ENSG00000109929	ENSG00000131242	ENSG00000179454	ENSG00000179454		ENSG00000080371	ENSG00000102225	ENSG00000066654				ENSG00000164574					ENSG00000255198
ENSG00000130810	ENSG00000104859	ENSG00000228474	ENSG00000197043	ENSG00000161835	ENSG00000080371	ENSG00000242861	ENSG00000111897	ENSG00000027075	ENSG00000120705	ENSG00000157933	ENSG00000133030	ENSG00000232956	ENSG00000163600	ENSG00000211792	ENSG00000178199	ENSG00000100429	ENSG00000124151	ENSG00000262456	ENSG00000262456		ENSG00000131634	ENSG00000100949	ENSG00000161835				ENSG00000141526					ENSG00000211669
ENSG00000102225	ENSG00000119707	ENSG00000113558	ENSG00000109332	ENSG00000136878	ENSG00000034677	ENSG00000238528	ENSG00000211668	ENSG00000091527	ENSG00000185905	ENSG00000114784	ENSG00000139722	ENSG00000138069	ENSG00000163564	ENSG00000026751	ENSG00000120733	ENSG00000165355	ENSG00000114439	ENSG00000089692	ENSG00000089692		ENSG00000034677	ENSG00000085978	ENSG00000136878				ENSG00000166927					ENSG00000079332
ENSG00000085978	ENSG00000070495	ENSG00000166794	ENSG00000169564	ENSG00000165782	ENSG00000165494	ENSG00000143258	ENSG00000224032	ENSG00000177733	ENSG00000137947	ENSG00000178381	ENSG00000131876	ENSG00000117133	ENSG00000211936	ENSG00000258232	ENSG00000197766	ENSG00000129933	ENSG00000123066	ENSG00000170185	ENSG00000170185		ENSG00000166128	ENSG00000089060	ENSG00000165782				ENSG00000162747					ENSG00000087074
ENSG00000101544	ENSG00000142599	ENSG00000064666	ENSG00000131236	ENSG00000163600	ENSG00000166128	ENSG00000166685	ENSG00000138757	ENSG00000211659	ENSG00000139620	ENSG00000131503	ENSG00000144802	ENSG00000135655	ENSG00000129235	ENSG00000069667	ENSG00000171988	ENSG00000108963	ENSG00000174173	ENSG00000179119	ENSG00000179119		ENSG00000130254	ENSG00000109917	ENSG00000163600				ENSG00000088992					ENSG00000129277
ENSG00000119953	ENSG00000183484	ENSG00000063046	ENSG00000113387	ENSG00000134899	ENSG00000223244	ENSG00000130734	ENSG00000239264	ENSG00000100138	ENSG00000115306	ENSG00000151327	ENSG00000196756	ENSG00000068697	ENSG00000211638	ENSG00000105726	ENSG00000179639	ENSG00000270075	ENSG00000179981	ENSG00000143751	ENSG00000143751		ENSG00000223244	ENSG00000158863	ENSG00000134899				ENSG00000169583					ENSG00000128245
ENSG00000067596	ENSG00000128159	ENSG00000243678	ENSG00000140319	ENSG00000116717	ENSG00000198089	ENSG00000184381	ENSG00000115758	ENSG00000132432	ENSG00000204287	ENSG00000005812	ENSG00000135070	ENSG00000133316	ENSG00000170852	ENSG00000172965	ENSG00000101665	ENSG00000156232	ENSG00000144749	ENSG00000224470	ENSG00000224470		ENSG00000198089	ENSG00000166507	ENSG00000116717				ENSG00000135604					ENSG00000211934
ENSG00000083520	ENSG00000125772	ENSG00000204525	ENSG00000179218	ENSG00000149212	ENSG00000184602	ENSG00000132510	ENSG00000105643	ENSG00000071073	ENSG00000129460	ENSG00000072310	ENSG00000135905	ENSG00000211938	ENSG00000211792	ENSG00000139233	ENSG00000056558	ENSG00000100401	ENSG00000169826	ENSG00000198517	ENSG00000198517		ENSG00000184602	ENSG00000114742	ENSG00000149212				ENSG00000116663					ENSG00000181036
ENSG00000095574	ENSG00000265558	ENSG00000170296	ENSG00000172757	ENSG00000121210	ENSG00000162496	ENSG00000116809	ENSG00000161011	ENSG00000186184	ENSG00000135048	ENSG00000198520	ENSG00000139112	ENSG00000102760	ENSG00000026751	ENSG00000002549	ENSG00000221792	ENSG00000130935	ENSG00000118482	ENSG00000132912	ENSG00000132912		ENSG00000162496	ENSG00000178199	ENSG00000121210				ENSG00000125898					ENSG00000171681
ENSG00000155304	ENSG00000144711	ENSG00000185624	ENSG00000110321	ENSG00000010322	ENSG00000255198	ENSG00000135473	ENSG00000183617	ENSG00000169976	ENSG00000117523	ENSG00000140400	ENSG00000198961	ENSG00000141582	ENSG00000258232	ENSG00000211652	ENSG00000129911	ENSG00000104859	ENSG00000181788	ENSG00000172409	ENSG00000172409		ENSG00000255198	ENSG00000120733	ENSG00000170852				ENSG00000111328					ENSG00000138867
ENSG00000114742	ENSG00000100109	ENSG00000183291	ENSG00000206503	ENSG00000103064	ENSG00000173575	ENSG00000005206	ENSG00000125910	ENSG00000238103	ENSG00000122299	ENSG00000259813	ENSG00000031823	ENSG00000100603	ENSG00000069667	ENSG00000129226	ENSG00000141994	ENSG00000119707	ENSG00000053918	ENSG00000126368	ENSG00000126368		ENSG00000173575	ENSG00000197766	ENSG00000106003				ENSG00000263934					ENSG00000057657
ENSG00000178199	ENSG00000163635	ENSG00000107742	ENSG00000185787	ENSG00000170852	ENSG00000135164	ENSG00000140199	ENSG00000120690	ENSG00000244437	ENSG00000140455	ENSG00000105699	ENSG00000055483	ENSG00000178971	ENSG00000105726	ENSG00000169660	ENSG00000171606	ENSG00000070495	ENSG00000163874	ENSG00000254721	ENSG00000254721		ENSG00000135164	ENSG00000112182	ENSG00000101695				ENSG00000182578					ENSG00000161835
ENSG00000120733	ENSG00000112297	ENSG00000180353	ENSG00000100911	ENSG00000101695	ENSG00000076924	ENSG00000229807	ENSG00000178913	ENSG00000211663	ENSG00000113448	ENSG00000133134	ENSG00000171456	ENSG00000234617	ENSG00000172965	ENSG00000104856	ENSG00000101745	ENSG00000142599	ENSG00000169710	ENSG00000124466	ENSG00000124466		ENSG00000145191	ENSG00000171988	ENSG00000163811				ENSG00000211942					ENSG00000111615
ENSG00000101654	ENSG00000178974	ENSG00000130811	ENSG00000164919	ENSG00000163811	ENSG00000100441	ENSG00000215252	ENSG00000237550	ENSG00000125356	ENSG00000005339	ENSG00000147162	ENSG00000138166	ENSG00000160271	ENSG00000168329	ENSG00000112149	ENSG00000113504	ENSG00000183484	ENSG00000186810	ENSG00000147454	ENSG00000147454		ENSG00000110514	ENSG00000179639	ENSG00000174738				ENSG00000127951					ENSG00000123728
ENSG00000112182	ENSG00000105325	ENSG00000143119	ENSG00000197747	ENSG00000165792	ENSG00000083168	ENSG00000100003	ENSG00000113088	ENSG00000156411	ENSG00000142178	ENSG00000113580	ENSG00000134294	ENSG00000183508	ENSG00000002549	ENSG00000180739	ENSG00000035928	ENSG00000136699	ENSG00000069702	ENSG00000169554	ENSG00000169554		ENSG00000076924	ENSG00000101665	ENSG00000069667				ENSG00000188677					ENSG00000211685
ENSG00000171988	ENSG00000092148	ENSG00000114353	ENSG00000141522	ENSG00000069667	ENSG00000054267	ENSG00000202532	ENSG00000119048	ENSG00000059804	ENSG00000179912	ENSG00000091592	ENSG00000140564	ENSG00000132823	ENSG00000211652	ENSG00000211655	ENSG00000239857	ENSG00000128159	ENSG00000105127	ENSG00000167768	ENSG00000167768		ENSG00000100441	ENSG00000056558	ENSG00000138433				ENSG00000269900					ENSG00000083454
ENSG00000179639	ENSG00000122515	ENSG00000197043	ENSG00000070831	ENSG00000117616	ENSG00000136271	ENSG00000132781	ENSG00000272256	ENSG00000127824	ENSG00000104765	ENSG00000213782	ENSG00000076108	ENSG00000153066	ENSG00000129226	ENSG00000115520	ENSG00000172046	ENSG00000125772	ENSG00000006634				ENSG00000083168	ENSG00000221792	ENSG00000099992				ENSG00000100292					ENSG00000116717
ENSG00000101665	ENSG00000164944	ENSG00000109332	ENSG00000139644	ENSG00000138433	ENSG00000163659	ENSG00000102606	ENSG00000089737	ENSG00000185883	ENSG00000187741	ENSG00000120705	ENSG00000121749	ENSG00000142102	ENSG00000104856	ENSG00000116604	ENSG00000059122	ENSG00000265558	ENSG00000215251				ENSG00000054267	ENSG00000129911	ENSG00000255026				ENSG00000078081					ENSG00000108064
ENSG00000056558	ENSG00000207547	ENSG00000169564	ENSG00000149100	ENSG00000100288	ENSG00000119950	ENSG00000070814	ENSG00000111796	ENSG00000173726	ENSG00000100461	ENSG00000155849	ENSG00000137841	ENSG00000121579	ENSG00000112149	ENSG00000255569	ENSG00000183813	ENSG00000144711	ENSG00000102225				ENSG00000136271	ENSG00000141994	ENSG00000077044				ENSG00000211670					ENSG00000211936
ENSG00000129911	ENSG00000007392	ENSG00000131236	ENSG00000197746	ENSG00000255026	ENSG00000066654	ENSG00000100376	ENSG00000100664	ENSG00000198832	ENSG00000101445	ENSG00000185905	ENSG00000196187	ENSG00000123505	ENSG00000180739	ENSG00000167470	ENSG00000075539	ENSG00000100109	ENSG00000185658				ENSG00000163659	ENSG00000171606	ENSG00000076641				ENSG00000167768					ENSG00000170852
ENSG00000136381	ENSG00000164951	ENSG00000113387	ENSG00000184007	ENSG00000077044	ENSG00000161835	ENSG00000197136	ENSG00000254709	ENSG00000266192	ENSG00000137955	ENSG00000137947	ENSG00000172845	ENSG00000211746	ENSG00000211655	ENSG00000066336	ENSG00000100425	ENSG00000163635	ENSG00000085978				ENSG00000245532	ENSG00000101745	ENSG00000103257									ENSG00000138433
ENSG00000121879	ENSG00000077150	ENSG00000140319	ENSG00000162894	ENSG00000095015	ENSG00000165782	ENSG00000100416	ENSG00000112096	ENSG00000113013	ENSG00000169375	ENSG00000139620	ENSG00000198218	ENSG00000069399	ENSG00000106605	ENSG00000173442	ENSG00000166747	ENSG00000184470	ENSG00000101544				ENSG00000119950	ENSG00000113504	ENSG00000266714									ENSG00000139233
ENSG00000154310	ENSG00000170525	ENSG00000172757	ENSG00000110955	ENSG00000076641	ENSG00000111615	ENSG00000072858	ENSG00000197006	ENSG00000169508	ENSG00000165516	ENSG00000115306	ENSG00000101782	ENSG00000168036	ENSG00000115520	ENSG00000128590	ENSG00000006652	ENSG00000112297	ENSG00000067596				ENSG00000066654	ENSG00000126351	ENSG00000115816									ENSG00000095015
ENSG00000141994	ENSG00000167258	ENSG00000110321	ENSG00000134333	ENSG00000100258	ENSG00000231721	ENSG00000085872	ENSG00000154217	ENSG00000237506	ENSG00000155287	ENSG00000204287	ENSG00000155307	ENSG00000176845	ENSG00000116604	ENSG00000165312	ENSG00000146826	ENSG00000105325	ENSG00000083520				ENSG00000161835	ENSG00000239857	ENSG00000073169									ENSG00000211652
ENSG00000171606	ENSG00000064687	ENSG00000185787	ENSG00000235552	ENSG00000251562	ENSG00000163600	ENSG00000213995	ENSG00000177889	ENSG00000090104	ENSG00000173846	ENSG00000129460	ENSG00000107485	ENSG00000071054	ENSG00000255569	ENSG00000214367	ENSG00000185950	ENSG00000092148	ENSG00000095574				ENSG00000136878	ENSG00000059122	ENSG00000100614									ENSG00000127870
ENSG00000101745	ENSG00000005007	ENSG00000100911	ENSG00000077549	ENSG00000103257	ENSG00000134899	ENSG00000137070	ENSG00000140299	ENSG00000151366	ENSG00000008128	ENSG00000135048	ENSG00000157933	ENSG00000061938	ENSG00000167470	ENSG00000174437	ENSG00000130787	ENSG00000164944	ENSG00000155304				ENSG00000165782	ENSG00000162642	ENSG00000143924									ENSG00000136504
ENSG00000126351	ENSG00000166233	ENSG00000164919	ENSG00000143761	ENSG00000266714	ENSG00000116717	ENSG00000196735	ENSG00000137575	ENSG00000082153	ENSG00000105205	ENSG00000117523	ENSG00000172932	ENSG00000116044	ENSG00000066336	ENSG00000108106	ENSG00000125245	ENSG00000007392	ENSG00000114742				ENSG00000163600	ENSG00000183813	ENSG00000141646									ENSG00000104856
ENSG00000035928	ENSG00000131242	ENSG00000197747	ENSG00000143933	ENSG00000073169	ENSG00000149212	ENSG00000124762	ENSG00000101558	ENSG00000167552	ENSG00000008952	ENSG00000105835	ENSG00000114784	ENSG00000139636	ENSG00000171206	ENSG00000226752	ENSG00000104957	ENSG00000064547	ENSG00000178199				ENSG00000134899	ENSG00000075539	ENSG00000184436									ENSG00000198160
ENSG00000162642	ENSG00000075856	ENSG00000269893	ENSG00000106153	ENSG00000158773	ENSG00000121210	ENSG00000141526	ENSG00000113575	ENSG00000075884	ENSG00000179344	ENSG00000122299	ENSG00000178381	ENSG00000005483	ENSG00000173442	ENSG00000121073	ENSG00000113240	ENSG00000164951	ENSG00000152127				ENSG00000116717	ENSG00000100425	ENSG00000169499									ENSG00000112149
ENSG00000179456	ENSG00000147854	ENSG00000227081	ENSG00000244398	ENSG00000146067	ENSG00000103064	ENSG00000172766	ENSG00000183726	ENSG00000211660	ENSG00000221978	ENSG00000140455	ENSG00000131503	ENSG00000140983	ENSG00000128590	ENSG00000103326	ENSG00000176248	ENSG00000099985	ENSG00000056586				ENSG00000149212	ENSG00000166747	ENSG00000134186									ENSG00000180739
ENSG00000183813	ENSG00000102226	ENSG00000178980	ENSG00000067225	ENSG00000143924	ENSG00000170852	ENSG00000133794	ENSG00000267165	ENSG00000168209	ENSG00000189283	ENSG00000171843	ENSG00000151327	ENSG00000100644	ENSG00000214367	ENSG00000165355	ENSG00000138074	ENSG00000111641	ENSG00000109270				ENSG00000121210	ENSG00000006652	ENSG00000112149									ENSG00000211655
ENSG00000089818	ENSG00000101199	ENSG00000245910	ENSG00000132341	ENSG00000185359	ENSG00000101695	ENSG00000165525	ENSG00000196843	ENSG00000168003	ENSG00000158805	ENSG00000113448	ENSG00000005812	ENSG00000186716	ENSG00000174437	ENSG00000166949	ENSG00000178951	ENSG00000077150	ENSG00000071243				ENSG00000010322	ENSG00000185950	ENSG00000138834									ENSG00000117394
ENSG00000075539	ENSG00000123066	ENSG00000070831	ENSG00000172183	ENSG00000064201	ENSG00000163811	ENSG00000099949	ENSG00000125952	ENSG00000137876	ENSG00000108848	ENSG00000150907	ENSG00000061273	ENSG00000252061	ENSG00000108106	ENSG00000006007	ENSG00000167548	ENSG00000170525	ENSG00000101654				ENSG00000177666	ENSG00000130787	ENSG00000116604									ENSG00000115520
ENSG00000100425	ENSG00000182095	ENSG00000142546	ENSG00000205352	ENSG00000141646	ENSG00000138381	ENSG00000119397	ENSG00000109787	ENSG00000028137	ENSG00000185338	ENSG00000005339	ENSG00000100422	ENSG00000067334	ENSG00000121073	ENSG00000270075	ENSG00000198925	ENSG00000064687	ENSG00000112182				ENSG00000170852	ENSG00000125245	ENSG00000146834									ENSG00000116604
ENSG00000166747	ENSG00000144749	ENSG00000139644	ENSG00000215030	ENSG00000038358	ENSG00000069667	ENSG00000198517	ENSG00000146457	ENSG00000164091	ENSG00000137817	ENSG00000142178	ENSG00000072310	ENSG00000164040	ENSG00000165355	ENSG00000136240	ENSG00000077458	ENSG00000185324	ENSG00000171988				ENSG00000103657	ENSG00000104957	ENSG00000027697									ENSG00000066336
ENSG00000006652	ENSG00000118482	ENSG00000153563	ENSG00000167468	ENSG00000184436	ENSG00000164758	ENSG00000112739	ENSG00000117614	ENSG00000180817	ENSG00000159753	ENSG00000179912	ENSG00000127603	ENSG00000177426	ENSG00000179820	ENSG00000211965	ENSG00000266325	ENSG00000005007	ENSG00000179639				ENSG00000106003	ENSG00000113240	ENSG00000168137									ENSG00000168264
ENSG00000185950	ENSG00000008710	ENSG00000149100	ENSG00000142227	ENSG00000134186	ENSG00000117616	ENSG00000187091	ENSG00000143772	ENSG00000111897	ENSG00000186918	ENSG00000104765	ENSG00000188229	ENSG00000133030	ENSG00000166949	ENSG00000197329	ENSG00000076984	ENSG00000166233	ENSG00000101665				ENSG00000101695	ENSG00000176248	ENSG00000144048									ENSG00000198874
ENSG00000185158	ENSG00000197989	ENSG00000197746	ENSG00000167004	ENSG00000112149	ENSG00000138433	ENSG00000156502	ENSG00000168175	ENSG00000211668	ENSG00000054118	ENSG00000187741	ENSG00000105879	ENSG00000139722	ENSG00000006007	ENSG00000156232	ENSG00000137502	ENSG00000131242	ENSG00000100532				ENSG00000163811	ENSG00000136709	ENSG00000167470									ENSG00000128590
ENSG00000130787	ENSG00000163874	ENSG00000184007	ENSG00000009307	ENSG00000138834	ENSG00000255026	ENSG00000162402	ENSG00000105993	ENSG00000182004	ENSG00000138398	ENSG00000100461	ENSG00000140400	ENSG00000131876	ENSG00000270075	ENSG00000160209	ENSG00000164300	ENSG00000160813	ENSG00000056558				ENSG00000174738	ENSG00000266402	ENSG00000221743									ENSG00000257764
ENSG00000125245	ENSG00000163050	ENSG00000162894	ENSG00000152234	ENSG00000132300	ENSG00000095015	ENSG00000269928	ENSG00000162385	ENSG00000172428	ENSG00000120948	ENSG00000101445	ENSG00000259813	ENSG00000144802	ENSG00000136240	ENSG00000151239	ENSG00000160584	ENSG00000075856	ENSG00000129911				ENSG00000069667	ENSG00000138074	ENSG00000213079									ENSG00000186660
ENSG00000104957	ENSG00000058600	ENSG00000110955	ENSG00000125534	ENSG00000135968	ENSG00000076641	ENSG00000155256	ENSG00000184900	ENSG00000065518	ENSG00000132716	ENSG00000137955	ENSG00000109606	ENSG00000165732	ENSG00000211965	ENSG00000113368	ENSG00000242861	ENSG00000147854	ENSG00000136381				ENSG00000105726	ENSG00000178951	ENSG00000079313									ENSG00000137478
ENSG00000271725	ENSG00000169710	ENSG00000134333	ENSG00000176340	ENSG00000114120	ENSG00000251562	ENSG00000241945	ENSG00000163513	ENSG00000224032	ENSG00000101901	ENSG00000169375	ENSG00000105397	ENSG00000196756	ENSG00000197329	ENSG00000070495	ENSG00000238528	ENSG00000102226	ENSG00000121879				ENSG00000117616	ENSG00000167548	ENSG00000168264									ENSG00000165312
ENSG00000166046	ENSG00000186810	ENSG00000235552	ENSG00000211450	ENSG00000116604	ENSG00000103257	ENSG00000140968	ENSG00000099860	ENSG00000010244	ENSG00000164466	ENSG00000165516	ENSG00000147162	ENSG00000135070	ENSG00000156232	ENSG00000211611	ENSG00000166685	ENSG00000101199	ENSG00000154310				ENSG00000138433	ENSG00000198925	ENSG00000174953									ENSG00000115540
ENSG00000160094	ENSG00000134744	ENSG00000077549	ENSG00000118816	ENSG00000146834	ENSG00000266714	ENSG00000126461	ENSG00000053254	ENSG00000138757	ENSG00000198837	ENSG00000155287	ENSG00000123933	ENSG00000135905	ENSG00000160209	ENSG00000131981	ENSG00000130734	ENSG00000123066	ENSG00000171606				ENSG00000099992	ENSG00000077458	ENSG00000139718									ENSG00000116731
ENSG00000152520	ENSG00000077235	ENSG00000143761	ENSG00000173660	ENSG00000027697	ENSG00000115816	ENSG00000153914	ENSG00000166848	ENSG00000239264	ENSG00000115548	ENSG00000167881	ENSG00000113580	ENSG00000139112	ENSG00000151239	ENSG00000171848	ENSG00000121671	ENSG00000182095	ENSG00000126351				ENSG00000255026	ENSG00000076984	ENSG00000182541									ENSG00000226752
ENSG00000176095	ENSG00000105127	ENSG00000143933	ENSG00000135046	ENSG00000168137	ENSG00000127870	ENSG00000100726	ENSG00000196352	ENSG00000115758	ENSG00000080371	ENSG00000173846	ENSG00000091592	ENSG00000198961	ENSG00000163754	ENSG00000175376	ENSG00000070961	ENSG00000144749	ENSG00000197170				ENSG00000077044	ENSG00000137502	ENSG00000147050									ENSG00000165355
ENSG00000113240	ENSG00000140829	ENSG00000182866	ENSG00000127314	ENSG00000167470	ENSG00000158773	ENSG00000121413	ENSG00000184990	ENSG00000105643	ENSG00000034677	ENSG00000144566	ENSG00000213782	ENSG00000244462	ENSG00000113368	ENSG00000136213	ENSG00000184381	ENSG00000118482	ENSG00000110429				ENSG00000076641	ENSG00000164300	ENSG00000161204									ENSG00000179820
ENSG00000136709	ENSG00000144136	ENSG00000106153	ENSG00000126247	ENSG00000213079	ENSG00000146067	ENSG00000131797	ENSG00000113712	ENSG00000086598	ENSG00000166128	ENSG00000105205	ENSG00000120705	ENSG00000055483	ENSG00000070495	ENSG00000143878	ENSG00000144535	ENSG00000008710	ENSG00000108406				ENSG00000251562	ENSG00000160584	ENSG00000141867									ENSG00000270075
ENSG00000107362	ENSG00000164828	ENSG00000244398	ENSG00000100353	ENSG00000079313	ENSG00000143924	ENSG00000253998	ENSG00000136536	ENSG00000161011	ENSG00000130254	ENSG00000065675	ENSG00000155849	ENSG00000171456	ENSG00000211611	ENSG00000134184	ENSG00000042429	ENSG00000197989	ENSG00000136932				ENSG00000125447	ENSG00000242861	ENSG00000153922									ENSG00000197329
ENSG00000114796	ENSG00000121716	ENSG00000067225	ENSG00000113732	ENSG00000168264	ENSG00000136504	ENSG00000211642	ENSG00000211671	ENSG00000183617	ENSG00000223244	ENSG00000143337	ENSG00000185905	ENSG00000138166	ENSG00000131981	ENSG00000164951	ENSG00000101216	ENSG00000132153	ENSG00000179456				ENSG00000103257	ENSG00000238528	ENSG00000181523									ENSG00000156232
ENSG00000138074	ENSG00000153207	ENSG00000132341	ENSG00000065809	ENSG00000198874	ENSG00000141646	ENSG00000215417	ENSG00000163220	ENSG00000211648	ENSG00000198089	ENSG00000008952	ENSG00000137947	ENSG00000134294	ENSG00000171848	ENSG00000107968	ENSG00000120889	ENSG00000163874	ENSG00000183813				ENSG00000266714	ENSG00000166685	ENSG00000166579									ENSG00000140379
ENSG00000178951	ENSG00000006634	ENSG00000172183	ENSG00000126267	ENSG00000174953	ENSG00000184436	ENSG00000135720	ENSG00000182149	ENSG00000125910	ENSG00000184602	ENSG00000221978	ENSG00000139620	ENSG00000140564	ENSG00000175376	ENSG00000152778	ENSG00000132510	ENSG00000163050	ENSG00000089818				ENSG00000115816	ENSG00000130734	ENSG00000214367									ENSG00000163754
ENSG00000198925	ENSG00000064932	ENSG00000205352	ENSG00000189403	ENSG00000139718	ENSG00000169499	ENSG00000123358	ENSG00000116030	ENSG00000196776	ENSG00000172780	ENSG00000158805	ENSG00000115306	ENSG00000182957	ENSG00000143878	ENSG00000211941	ENSG00000136152	ENSG00000058600	ENSG00000271941				ENSG00000073169	ENSG00000121671	ENSG00000109929									ENSG00000233426
ENSG00000108587	ENSG00000130810	ENSG00000215030	ENSG00000111775	ENSG00000182541	ENSG00000134186	ENSG00000243679	ENSG00000260032	ENSG00000120690	ENSG00000162496	ENSG00000108848	ENSG00000129460	ENSG00000273275	ENSG00000134184	ENSG00000073861	ENSG00000143514	ENSG00000169710	ENSG00000100425				ENSG00000158773	ENSG00000070961	ENSG00000116731									ENSG00000070495
ENSG00000096717	ENSG00000102225	ENSG00000167468	ENSG00000163131	ENSG00000147050	ENSG00000198160	ENSG00000127511	ENSG00000100225	ENSG00000237550	ENSG00000255198	ENSG00000138032	ENSG00000135048	ENSG00000076108	ENSG00000164951	ENSG00000141682	ENSG00000129315	ENSG00000186810	ENSG00000166747				ENSG00000146067	ENSG00000184381	ENSG00000165355									ENSG00000211611
ENSG00000077458	ENSG00000100949	ENSG00000173762	ENSG00000187608	ENSG00000161204	ENSG00000112149	ENSG00000070047	ENSG00000134758	ENSG00000113088	ENSG00000173575	ENSG00000145860	ENSG00000239855	ENSG00000121749	ENSG00000107968	ENSG00000134910	ENSG00000163681	ENSG00000134744	ENSG00000185950				ENSG00000143924	ENSG00000042429	ENSG00000129933									ENSG00000131981
ENSG00000077684	ENSG00000085978	ENSG00000142227	ENSG00000241468	ENSG00000165458	ENSG00000138834	ENSG00000110172	ENSG00000126524	ENSG00000166562	ENSG00000135164	ENSG00000182768	ENSG00000117523	ENSG00000137841	ENSG00000211941	ENSG00000257923	ENSG00000116809	ENSG00000077235	ENSG00000184384				ENSG00000185359	ENSG00000101216	ENSG00000108963									ENSG00000171488
ENSG00000076984	ENSG00000089060	ENSG00000167004	ENSG00000133321	ENSG00000153922	ENSG00000132300	ENSG00000162241	ENSG00000023734	ENSG00000119048	ENSG00000145191	ENSG00000185338	ENSG00000105835	ENSG00000172845	ENSG00000073861	ENSG00000145365	ENSG00000005206	ENSG00000105127	ENSG00000138750				ENSG00000141646	ENSG00000120889	ENSG00000059758									ENSG00000106392
ENSG00000137502	ENSG00000141258	ENSG00000198931	ENSG00000119335	ENSG00000181523	ENSG00000135968	ENSG00000185246	ENSG00000116741	ENSG00000211673	ENSG00000076924	ENSG00000242125	ENSG00000122299	ENSG00000198218	ENSG00000141682	ENSG00000255819	ENSG00000140199	ENSG00000140829	ENSG00000130787				ENSG00000038358	ENSG00000132510	ENSG00000270075									ENSG00000267350
ENSG00000164300	ENSG00000067596	ENSG00000009307	ENSG00000166598	ENSG00000214367	ENSG00000114120	ENSG00000169895	ENSG00000198355	ENSG00000144895	ENSG00000100441	ENSG00000137817	ENSG00000140455	ENSG00000101782	ENSG00000134910	ENSG00000163874	ENSG00000100003	ENSG00000144136	ENSG00000125245				ENSG00000184436	ENSG00000136152	ENSG00000254682									ENSG00000175376
ENSG00000242861	ENSG00000095574	ENSG00000152234	ENSG00000136938	ENSG00000109929	ENSG00000115520	ENSG00000160179	ENSG00000051108	ENSG00000133606	ENSG00000083168	ENSG00000215717	ENSG00000198586	ENSG00000155307	ENSG00000257923	ENSG00000108829	ENSG00000170322	ENSG00000164828	ENSG00000124788				ENSG00000169499	ENSG00000143514	ENSG00000197329									ENSG00000111711
ENSG00000238528	ENSG00000155304	ENSG00000125534	ENSG00000075415	ENSG00000196684	ENSG00000116604		ENSG00000113811	ENSG00000272256	ENSG00000054267	ENSG00000159753	ENSG00000113448	ENSG00000107485	ENSG00000145365	ENSG00000186810	ENSG00000202532	ENSG00000153207	ENSG00000148572				ENSG00000134186	ENSG00000129315	ENSG00000156232									ENSG00000131043
ENSG00000116863	ENSG00000158863	ENSG00000176340	ENSG00000198258	ENSG00000116731	ENSG00000146834		ENSG00000100796	ENSG00000089737	ENSG00000136271	ENSG00000110075	ENSG00000124422	ENSG00000157933	ENSG00000255819	ENSG00000069702	ENSG00000132781	ENSG00000158545	ENSG00000166046				ENSG00000112149	ENSG00000165879	ENSG00000100401									ENSG00000167851
ENSG00000198783	ENSG00000166507	ENSG00000146278	ENSG00000125354	ENSG00000100429	ENSG00000027697		ENSG00000155508	ENSG00000111796	ENSG00000163659	ENSG00000186918	ENSG00000005339	ENSG00000172932	ENSG00000100364	ENSG00000006634	ENSG00000102606	ENSG00000006634	ENSG00000160094				ENSG00000138834	ENSG00000116809	ENSG00000163349									ENSG00000241978
ENSG00000166685	ENSG00000114742	ENSG00000172543	ENSG00000080824	ENSG00000165355	ENSG00000168137		ENSG00000185115	ENSG00000100664	ENSG00000154027	ENSG00000054118	ENSG00000142178	ENSG00000114784	ENSG00000163874	ENSG00000215251	ENSG00000100376	ENSG00000064932	ENSG00000176095				ENSG00000132300	ENSG00000005206	ENSG00000130935									ENSG00000118515
ENSG00000130734	ENSG00000178199	ENSG00000211450	ENSG00000100380	ENSG00000129933	ENSG00000144048		ENSG00000099797	ENSG00000254709	ENSG00000245532	ENSG00000000419	ENSG00000163162	ENSG00000092871	ENSG00000108829	ENSG00000211939	ENSG00000100416	ENSG00000130810	ENSG00000136709				ENSG00000116604	ENSG00000140199	ENSG00000130803									ENSG00000143878
ENSG00000136026	ENSG00000120733	ENSG00000118816	ENSG00000203896	ENSG00000108963	ENSG00000167470		ENSG00000100221	ENSG00000138279	ENSG00000119950	ENSG00000138398	ENSG00000179912	ENSG00000178381	ENSG00000135677	ENSG00000004468	ENSG00000164190	ENSG00000102225	ENSG00000107362				ENSG00000146834	ENSG00000100003	ENSG00000134480									ENSG00000134184
ENSG00000121671	ENSG00000065526	ENSG00000173660	ENSG00000233276	ENSG00000059758	ENSG00000105248		ENSG00000114779	ENSG00000112096	ENSG00000066654	ENSG00000101901	ENSG00000187741	ENSG00000131503	ENSG00000186810	ENSG00000241244	ENSG00000085872	ENSG00000100949	ENSG00000114796				ENSG00000027697	ENSG00000170322	ENSG00000104859									ENSG00000147044
ENSG00000145349	ENSG00000101654	ENSG00000189067	ENSG00000211591	ENSG00000270075	ENSG00000213079		ENSG00000171522	ENSG00000197006	ENSG00000161835	ENSG00000164466	ENSG00000101445	ENSG00000151327	ENSG00000069702	ENSG00000144231	ENSG00000213995	ENSG00000085978	ENSG00000090432				ENSG00000168137	ENSG00000202532	ENSG00000171634									ENSG00000146535
ENSG00000127804	ENSG00000112182	ENSG00000239839	ENSG00000164054	ENSG00000061936	ENSG00000079313		ENSG00000224578	ENSG00000154217	ENSG00000136878	ENSG00000115548	ENSG00000155287	ENSG00000005812	ENSG00000215251	ENSG00000183298	ENSG00000137070	ENSG00000089060	ENSG00000138074				ENSG00000144048	ENSG00000132781	ENSG00000119707									ENSG00000107968
ENSG00000070961	ENSG00000171988	ENSG00000135046	ENSG00000211899	ENSG00000254682	ENSG00000168264		ENSG00000198189	ENSG00000177889	ENSG00000264443	ENSG00000080371	ENSG00000167881	ENSG00000072310	ENSG00000126458	ENSG00000155090	ENSG00000124762	ENSG00000119953	ENSG00000178951				ENSG00000167470	ENSG00000102606	ENSG00000070495									ENSG00000099985
ENSG00000184381	ENSG00000179639	ENSG00000137193	ENSG00000164104	ENSG00000197329	ENSG00000198874		ENSG00000029363	ENSG00000140299	ENSG00000165782	ENSG00000034677	ENSG00000173846	ENSG00000198492	ENSG00000211939	ENSG00000155304	ENSG00000141526	ENSG00000141258	ENSG00000108587				ENSG00000221743	ENSG00000100416	ENSG00000142599									ENSG00000233825
ENSG00000118707	ENSG00000101665	ENSG00000127314	ENSG00000110876	ENSG00000047346	ENSG00000174953		ENSG00000232388	ENSG00000137575	ENSG00000069345	ENSG00000165494	ENSG00000144566	ENSG00000188229	ENSG00000004468	ENSG00000187837	ENSG00000133794	ENSG00000095574	ENSG00000096717				ENSG00000213079	ENSG00000085872	ENSG00000183484									ENSG00000152778
ENSG00000042429	ENSG00000056558	ENSG00000126247	ENSG00000112695	ENSG00000156232	ENSG00000139718		ENSG00000109390	ENSG00000106588	ENSG00000163600	ENSG00000166128	ENSG00000105639	ENSG00000101439	ENSG00000241244	ENSG00000211658	ENSG00000165525	ENSG00000158863	ENSG00000077684				ENSG00000079313	ENSG00000213995	ENSG00000136699									ENSG00000211941
ENSG00000101216	ENSG00000221792	ENSG00000100353	ENSG00000170144	ENSG00000163349	ENSG00000182541		ENSG00000179094	ENSG00000154978	ENSG00000134899	ENSG00000223244	ENSG00000008128	ENSG00000105879	ENSG00000144231	ENSG00000135362	ENSG00000198517	ENSG00000166507	ENSG00000168092				ENSG00000168264	ENSG00000123983	ENSG00000128159									ENSG00000073861
ENSG00000120889	ENSG00000129911	ENSG00000113732	ENSG00000123144	ENSG00000130935	ENSG00000147050		ENSG00000103035	ENSG00000101558	ENSG00000116717	ENSG00000198089	ENSG00000105205	ENSG00000140400	ENSG00000155090	ENSG00000100299	ENSG00000112739	ENSG00000114742	ENSG00000137502				ENSG00000174953	ENSG00000137070	ENSG00000125772									ENSG00000141682
ENSG00000132510	ENSG00000136381	ENSG00000065809	ENSG00000152082	ENSG00000130803	ENSG00000161204		ENSG00000143977	ENSG00000100632	ENSG00000149212	ENSG00000184602	ENSG00000065675	ENSG00000259813	ENSG00000155304	ENSG00000179021	ENSG00000187091	ENSG00000178199	ENSG00000164300				ENSG00000139718	ENSG00000196735	ENSG00000137770									ENSG00000124151
ENSG00000023287	ENSG00000121879	ENSG00000188042	ENSG00000126756	ENSG00000109381	ENSG00000138081		ENSG00000125652	ENSG00000113575	ENSG00000121210	ENSG00000156804	ENSG00000170638	ENSG00000109606	ENSG00000156273	ENSG00000109670	ENSG00000256862	ENSG00000120733	ENSG00000116863				ENSG00000182541	ENSG00000124762	ENSG00000144711									ENSG00000083457
ENSG00000136152	ENSG00000154310	ENSG00000168421	ENSG00000142168	ENSG00000233355	ENSG00000153922		ENSG00000153179	ENSG00000183726	ENSG00000010322	ENSG00000258352	ENSG00000143337	ENSG00000147162	ENSG00000187837	ENSG00000075234	ENSG00000156502	ENSG00000101654	ENSG00000108094				ENSG00000147050	ENSG00000141526	ENSG00000100109									ENSG00000145365
ENSG00000143514	ENSG00000141994	ENSG00000126267	ENSG00000211653	ENSG00000104859	ENSG00000181523		ENSG00000110367	ENSG00000143621	ENSG00000103064	ENSG00000162496	ENSG00000179344	ENSG00000123933	ENSG00000211658	ENSG00000179639	ENSG00000132773	ENSG00000112182	ENSG00000263244				ENSG00000161204	ENSG00000133794	ENSG00000163635									ENSG00000255819
ENSG00000104671	ENSG00000171606	ENSG00000172005	ENSG00000144746	ENSG00000171634	ENSG00000166579		ENSG00000095794	ENSG00000267165	ENSG00000177666	ENSG00000255198	ENSG00000221978	ENSG00000113580	ENSG00000135362	ENSG00000101665	ENSG00000162402	ENSG00000171988	ENSG00000136026				ENSG00000141867	ENSG00000259238	ENSG00000112297									ENSG00000138297
ENSG00000129315	ENSG00000101745	ENSG00000111775	ENSG00000196419	ENSG00000119707	ENSG00000214367		ENSG00000169738	ENSG00000196843	ENSG00000170852	ENSG00000173575	ENSG00000158805	ENSG00000091592	ENSG00000100299	ENSG00000065911	ENSG00000269928	ENSG00000179639	ENSG00000121671				ENSG00000153922	ENSG00000198517	ENSG00000186591									ENSG00000181788
ENSG00000165879	ENSG00000126351	ENSG00000163131	ENSG00000076662	ENSG00000070495	ENSG00000109929		ENSG00000173039	ENSG00000136238	ENSG00000103657	ENSG00000135164	ENSG00000108848	ENSG00000213782	ENSG00000179021	ENSG00000030110	ENSG00000204120	ENSG00000101665	ENSG00000145349				ENSG00000181523	ENSG00000112739	ENSG00000111711									ENSG00000163874
ENSG00000197860	ENSG00000035928	ENSG00000122034	ENSG00000089248	ENSG00000142599	ENSG00000116731		ENSG00000130844	ENSG00000125952	ENSG00000106003	ENSG00000079332	ENSG00000196498	ENSG00000120705	ENSG00000109670	ENSG00000111885	ENSG00000155256	ENSG00000056558	ENSG00000175197				ENSG00000166579	ENSG00000187091	ENSG00000160307									ENSG00000108829
ENSG00000116809	ENSG00000239857	ENSG00000187608	ENSG00000103363	ENSG00000183484	ENSG00000198815		ENSG00000112245	ENSG00000109787	ENSG00000101695	ENSG00000076924	ENSG00000242125	ENSG00000155849	ENSG00000075234	ENSG00000159335	ENSG00000241945	ENSG00000221792	ENSG00000070961				ENSG00000214367	ENSG00000156502	ENSG00000178974									ENSG00000104825
ENSG00000262456	ENSG00000162642	ENSG00000241468	ENSG00000005022	ENSG00000128159	ENSG00000100429		ENSG00000229833	ENSG00000146457	ENSG00000163811	ENSG00000100441	ENSG00000137817	ENSG00000185905	ENSG00000197766	ENSG00000134375	ENSG00000124466	ENSG00000129911	ENSG00000198382				ENSG00000109929	ENSG00000132773	ENSG00000105325									ENSG00000069702
ENSG00000252245	ENSG00000179456	ENSG00000133321	ENSG00000241837	ENSG00000125772	ENSG00000165355		ENSG00000170881	ENSG00000117614	ENSG00000174738	ENSG00000083168	ENSG00000159753	ENSG00000137947	ENSG00000179639	ENSG00000164687	ENSG00000153914	ENSG00000141994	ENSG00000151332				ENSG00000116731	ENSG00000204120	ENSG00000092148									ENSG00000184277
ENSG00000140199	ENSG00000183813	ENSG00000119335	ENSG00000164346	ENSG00000137770	ENSG00000108963		ENSG00000241755	ENSG00000143772	ENSG00000069667	ENSG00000054267	ENSG00000110075	ENSG00000176624	ENSG00000101665	ENSG00000139190	ENSG00000121413	ENSG00000171606	ENSG00000118707				ENSG00000100429	ENSG00000155256	ENSG00000147408									ENSG00000215251
ENSG00000132286	ENSG00000149187	ENSG00000143774	ENSG00000168653	ENSG00000265558	ENSG00000059758		ENSG00000115687	ENSG00000168175	ENSG00000117616	ENSG00000136271	ENSG00000145495	ENSG00000139620	ENSG00000065911	ENSG00000124256	ENSG00000131797	ENSG00000101745	ENSG00000101216				ENSG00000165355	ENSG00000241945	ENSG00000164944									ENSG00000211939
ENSG00000229807	ENSG00000089818	ENSG00000166598	ENSG00000136732	ENSG00000100109	ENSG00000270075		ENSG00000139725	ENSG00000129355	ENSG00000138433	ENSG00000163659	ENSG00000186480	ENSG00000115306	ENSG00000030110	ENSG00000229474	ENSG00000253998	ENSG00000113504	ENSG00000132510				ENSG00000129933	ENSG00000101343	ENSG00000207547									ENSG00000143756
ENSG00000163257	ENSG00000075539	ENSG00000136938	ENSG00000149823	ENSG00000163635	ENSG00000061936		ENSG00000186174	ENSG00000105993	ENSG00000099992	ENSG00000154027	ENSG00000152818	ENSG00000129460	ENSG00000111885	ENSG00000167325	ENSG00000153201	ENSG00000126351	ENSG00000023287				ENSG00000108963	ENSG00000124466	ENSG00000007392									ENSG00000188725
ENSG00000100003	ENSG00000100425	ENSG00000075415	ENSG00000115935	ENSG00000175376	ENSG00000254682		ENSG00000184588	ENSG00000213246	ENSG00000255026	ENSG00000119950	ENSG00000186918	ENSG00000135048	ENSG00000159335	ENSG00000182534	ENSG00000215417	ENSG00000035928	ENSG00000143514				ENSG00000059758	ENSG00000153914	ENSG00000164951									ENSG00000101544
ENSG00000170322	ENSG00000166747	ENSG00000198258	ENSG00000099783	ENSG00000196547	ENSG00000197329		ENSG00000137492	ENSG00000162385	ENSG00000077044	ENSG00000066654	ENSG00000160796	ENSG00000239855	ENSG00000134375	ENSG00000211974	ENSG00000123358	ENSG00000239857	ENSG00000104671				ENSG00000270075	ENSG00000121413	ENSG00000077150									ENSG00000155090
ENSG00000202532	ENSG00000006652	ENSG00000125354	ENSG00000236552	ENSG00000112297	ENSG00000047346		ENSG00000140307	ENSG00000211662	ENSG00000076641	ENSG00000161835	ENSG00000054118	ENSG00000117523	ENSG00000164687	ENSG00000106415	ENSG00000243679	ENSG00000059122	ENSG00000129315				ENSG00000254682	ENSG00000131797	ENSG00000170525									ENSG00000095574
ENSG00000132781	ENSG00000146826	ENSG00000080824	ENSG00000214389	ENSG00000227671	ENSG00000156232		ENSG00000086061	ENSG00000184900	ENSG00000251562	ENSG00000165782	ENSG00000138398	ENSG00000105835	ENSG00000155629	ENSG00000129757	ENSG00000070047	ENSG00000162642	ENSG00000165879				ENSG00000197329	ENSG00000253998	ENSG00000167258									ENSG00000155304
ENSG00000124789	ENSG00000185950	ENSG00000100380	ENSG00000169020	ENSG00000111711	ENSG00000163349		ENSG00000134248	ENSG00000163513	ENSG00000125447	ENSG00000111615	ENSG00000132716	ENSG00000122299	ENSG00000116514	ENSG00000124788	ENSG00000156030	ENSG00000179456	ENSG00000197860				ENSG00000156232	ENSG00000215417	ENSG00000064687									ENSG00000156273
ENSG00000102606	ENSG00000185158	ENSG00000172116	ENSG00000116288	ENSG00000105325	ENSG00000130935		ENSG00000204822	ENSG00000099860	ENSG00000103257	ENSG00000231721	ENSG00000101901	ENSG00000140455	ENSG00000124256	ENSG00000240834	ENSG00000172071	ENSG00000183813	ENSG00000179454				ENSG00000100401	ENSG00000123358	ENSG00000158987									ENSG00000187837
ENSG00000179119	ENSG00000130787	ENSG00000203896	ENSG00000105701	ENSG00000092148	ENSG00000130803		ENSG00000084463	ENSG00000115128	ENSG00000266714	ENSG00000008282	ENSG00000075413	ENSG00000150977	ENSG00000229474	ENSG00000228716	ENSG00000169895	ENSG00000149187	ENSG00000166266				ENSG00000163349	ENSG00000243679	ENSG00000005007									ENSG00000056586
ENSG00000100416	ENSG00000125245	ENSG00000233276	ENSG00000273173	ENSG00000122515	ENSG00000109381		ENSG00000143612	ENSG00000107372	ENSG00000115816	ENSG00000069345	ENSG00000181789	ENSG00000198586	ENSG00000167325	ENSG00000129657	ENSG00000160179	ENSG00000089818	ENSG00000262456				ENSG00000130935	ENSG00000070047	ENSG00000166233									ENSG00000179021
ENSG00000085872	ENSG00000104957	ENSG00000211591	ENSG00000177410	ENSG00000100941	ENSG00000185728		ENSG00000153234	ENSG00000053254	ENSG00000073169	ENSG00000163600	ENSG00000141298	ENSG00000113448	ENSG00000182534	ENSG00000153814		ENSG00000075539	ENSG00000132286				ENSG00000134480	ENSG00000172071	ENSG00000131242									ENSG00000109670
ENSG00000224470	ENSG00000271725	ENSG00000164054	ENSG00000110651	ENSG00000104907	ENSG00000134480		ENSG00000140743	ENSG00000166848	ENSG00000158773	ENSG00000134899	ENSG00000164466	ENSG00000124422	ENSG00000211974	ENSG00000188486		ENSG00000100425	ENSG00000229807				ENSG00000104859	ENSG00000139505	ENSG00000075856									ENSG00000112182
ENSG00000167977	ENSG00000166046	ENSG00000211899	ENSG00000136888	ENSG00000164944	ENSG00000104859		ENSG00000133773	ENSG00000196352	ENSG00000146067	ENSG00000116717	ENSG00000198837	ENSG00000005339	ENSG00000106415	ENSG00000090432		ENSG00000166747	ENSG00000163257				ENSG00000171634	ENSG00000169895	ENSG00000147854									ENSG00000121350
ENSG00000135241	ENSG00000152520	ENSG00000110876	ENSG00000251546	ENSG00000007392	ENSG00000171634		ENSG00000167460	ENSG00000125995	ENSG00000143924	ENSG00000149212	ENSG00000115548	ENSG00000142178	ENSG00000129757	ENSG00000108179		ENSG00000006652	ENSG00000171861				ENSG00000119707	ENSG00000160179	ENSG00000114439									ENSG00000100532
ENSG00000124762	ENSG00000176095	ENSG00000112695	ENSG00000214736	ENSG00000164951	ENSG00000119707		ENSG00000183684	ENSG00000184990	ENSG00000185359	ENSG00000121210	ENSG00000080371	ENSG00000163162	ENSG00000124788	ENSG00000147138		ENSG00000146826	ENSG00000100003				ENSG00000100888		ENSG00000102226									ENSG00000065911
ENSG00000141526	ENSG00000113240	ENSG00000170144	ENSG00000077984	ENSG00000111641	ENSG00000070495		ENSG00000243290	ENSG00000113712	ENSG00000141646	ENSG00000103064	ENSG00000243264	ENSG00000179912	ENSG00000240834	ENSG00000164611		ENSG00000185950	ENSG00000124789				ENSG00000070495		ENSG00000101199									ENSG00000147535
ENSG00000133794	ENSG00000176248	ENSG00000123144	ENSG00000265401	ENSG00000170525	ENSG00000142599		ENSG00000174574	ENSG00000136536	ENSG00000038358	ENSG00000170852	ENSG00000158615	ENSG00000187741	ENSG00000228716	ENSG00000211639		ENSG00000130787	ENSG00000179119				ENSG00000142599		ENSG00000123066									ENSG00000136381
ENSG00000259238	ENSG00000136709	ENSG00000152082	ENSG00000145649	ENSG00000167258	ENSG00000183484		ENSG00000129518	ENSG00000211671	ENSG00000184436	ENSG00000101695	ENSG00000198909	ENSG00000101445	ENSG00000196975	ENSG00000136250		ENSG00000125245	ENSG00000143751				ENSG00000183484		ENSG00000182095									ENSG00000121879
ENSG00000198517	ENSG00000107362	ENSG00000126756	ENSG00000078596	ENSG00000064687	ENSG00000128159		ENSG00000120063	ENSG00000163220	ENSG00000169499	ENSG00000163811	ENSG00000034677	ENSG00000155287	ENSG00000129657	ENSG00000211664		ENSG00000104957	ENSG00000224470				ENSG00000136699		ENSG00000179981									ENSG00000197763
ENSG00000112739	ENSG00000114796	ENSG00000142168	ENSG00000139239	ENSG00000185324	ENSG00000125772		ENSG00000100216	ENSG00000182149	ENSG00000134186	ENSG00000138381	ENSG00000172216	ENSG00000167881	ENSG00000153814	ENSG00000138600		ENSG00000166046	ENSG00000135241				ENSG00000128159		ENSG00000144749									ENSG00000138764
ENSG00000187091	ENSG00000266402	ENSG00000144746	ENSG00000100097	ENSG00000005007	ENSG00000145569		ENSG00000211640	ENSG00000170540	ENSG00000112149	ENSG00000174738	ENSG00000166128	ENSG00000173846	ENSG00000188486	ENSG00000266325		ENSG00000152520	ENSG00000124762				ENSG00000125772		ENSG00000169826									ENSG00000134375
ENSG00000156502	ENSG00000138074	ENSG00000196419	ENSG00000167863	ENSG00000166233	ENSG00000171488		ENSG00000160570	ENSG00000116030	ENSG00000138834	ENSG00000069667	ENSG00000130254	ENSG00000144566	ENSG00000108179	ENSG00000135114		ENSG00000176095	ENSG00000133794				ENSG00000137770		ENSG00000118482									ENSG00000139190
ENSG00000170027	ENSG00000178951	ENSG00000076662	ENSG00000162191	ENSG00000131242	ENSG00000137770		ENSG00000135926	ENSG00000114416	ENSG00000132300	ENSG00000132661	ENSG00000198089	ENSG00000169018	ENSG00000185745	ENSG00000259261		ENSG00000113240	ENSG00000198517				ENSG00000144711		ENSG00000008710									ENSG00000155629
ENSG00000132912	ENSG00000167548	ENSG00000110848	ENSG00000166913	ENSG00000160813	ENSG00000100109		ENSG00000126860	ENSG00000100225	ENSG00000135968	ENSG00000164758	ENSG00000079616	ENSG00000105205	ENSG00000164611	ENSG00000104738		ENSG00000176248	ENSG00000112739				ENSG00000100109		ENSG00000197989									ENSG00000136932
ENSG00000132773	ENSG00000198925	ENSG00000089248	ENSG00000172531	ENSG00000124151	ENSG00000163635		ENSG00000075426	ENSG00000180628	ENSG00000114120	ENSG00000138433	ENSG00000135127	ENSG00000065675	ENSG00000211639	ENSG00000223350		ENSG00000136709	ENSG00000170027				ENSG00000163635		ENSG00000181788									ENSG00000172366
ENSG00000204120	ENSG00000077458	ENSG00000103363	ENSG00000230202	ENSG00000147854	ENSG00000267350		ENSG00000177606	ENSG00000134758	ENSG00000116604	ENSG00000099992	ENSG00000184602	ENSG00000143337	ENSG00000100883	ENSG00000163599		ENSG00000107362	ENSG00000132912				ENSG00000112297		ENSG00000161638									ENSG00000123595
ENSG00000166526	ENSG00000076984	ENSG00000005022	ENSG00000242371	ENSG00000114439	ENSG00000175376		ENSG00000138767	ENSG00000126524	ENSG00000146834	ENSG00000255026	ENSG00000164463	ENSG00000008952	ENSG00000136250	ENSG00000144591		ENSG00000138074	ENSG00000132773				ENSG00000111711		ENSG00000053918									ENSG00000111252
ENSG00000101343	ENSG00000137502	ENSG00000241837	ENSG00000146066	ENSG00000102226	ENSG00000112297		ENSG00000204642	ENSG00000170345	ENSG00000027697	ENSG00000173545	ENSG00000162496	ENSG00000179344	ENSG00000211664	ENSG00000136026		ENSG00000178951	ENSG00000106771				ENSG00000160307		ENSG00000163874									ENSG00000183813
ENSG00000124466	ENSG00000164300	ENSG00000164346	ENSG00000148908	ENSG00000101199	ENSG00000227671		ENSG00000172115	ENSG00000023734	ENSG00000168137	ENSG00000095015	ENSG00000255198	ENSG00000221978	ENSG00000138600	ENSG00000175197		ENSG00000167548	ENSG00000172409				ENSG00000178974		ENSG00000163050									ENSG00000141664
ENSG00000121413	ENSG00000242861	ENSG00000168653	ENSG00000166136	ENSG00000123066	ENSG00000111711		ENSG00000177971	ENSG00000171222	ENSG00000144048	ENSG00000076641	ENSG00000134086	ENSG00000108848	ENSG00000266325	ENSG00000110063		ENSG00000198925	ENSG00000179562				ENSG00000105325		ENSG00000058600									ENSG00000176994
ENSG00000197037	ENSG00000238528	ENSG00000136732	ENSG00000147684	ENSG00000144749	ENSG00000131043		ENSG00000105058	ENSG00000116741	ENSG00000167470	ENSG00000251562	ENSG00000173575	ENSG00000138032	ENSG00000135114	ENSG00000113810		ENSG00000077458	ENSG00000126368				ENSG00000092148		ENSG00000169710									ENSG00000229474
ENSG00000164916	ENSG00000116863	ENSG00000149823	ENSG00000241553	ENSG00000163516	ENSG00000178974		ENSG00000178562	ENSG00000198355	ENSG00000213079	ENSG00000103257	ENSG00000135164	ENSG00000145860	ENSG00000259261	ENSG00000076003		ENSG00000266325	ENSG00000140153				ENSG00000122515		ENSG00000186810									ENSG00000185950
ENSG00000138593	ENSG00000263244	ENSG00000099783	ENSG00000125835	ENSG00000163161	ENSG00000105325		ENSG00000160888	ENSG00000051108	ENSG00000079313	ENSG00000266714	ENSG00000145191	ENSG00000196498	ENSG00000104738	ENSG00000150687		ENSG00000076984	ENSG00000254721				ENSG00000100941		ENSG00000134744									ENSG00000211974
ENSG00000253998	ENSG00000166685	ENSG00000236552	ENSG00000011304	ENSG00000181555	ENSG00000092148		ENSG00000243238	ENSG00000113811	ENSG00000168264	ENSG00000115816	ENSG00000074319	ENSG00000182768	ENSG00000223350	ENSG00000167173		ENSG00000137502	ENSG00000101343				ENSG00000164944		ENSG00000077235									ENSG00000196850
ENSG00000153201	ENSG00000130734	ENSG00000214389	ENSG00000244313	ENSG00000169826	ENSG00000122515		ENSG00000115806	ENSG00000100796	ENSG00000174953	ENSG00000127870	ENSG00000079332	ENSG00000221823	ENSG00000163599	ENSG00000124688		ENSG00000164300	ENSG00000124466				ENSG00000207547		ENSG00000105127									ENSG00000125245
ENSG00000215417	ENSG00000121671	ENSG00000169020	ENSG00000116824	ENSG00000173889	ENSG00000100941		ENSG00000147533	ENSG00000155508	ENSG00000139718	ENSG00000158773	ENSG00000131759	ENSG00000242125	ENSG00000144591	ENSG00000169896		ENSG00000242861	ENSG00000121413				ENSG00000007392		ENSG00000184277									ENSG00000100721
ENSG00000123358	ENSG00000127804	ENSG00000116288	ENSG00000188612	ENSG00000118482	ENSG00000164944		ENSG00000035115	ENSG00000185115	ENSG00000182541	ENSG00000100614	ENSG00000110514	ENSG00000137817	ENSG00000136026	ENSG00000121964		ENSG00000238528	ENSG00000120158				ENSG00000164951		ENSG00000140829									ENSG00000148572
ENSG00000085721	ENSG00000070961	ENSG00000105701	ENSG00000211949	ENSG00000008710	ENSG00000007392		ENSG00000198791	ENSG00000100221	ENSG00000147050	ENSG00000146067	ENSG00000076924	ENSG00000110075	ENSG00000175197	ENSG00000101336		ENSG00000116863	ENSG00000197037				ENSG00000111641		ENSG00000144136									ENSG00000153814
ENSG00000243679	ENSG00000184381	ENSG00000273173	ENSG00000243466	ENSG00000197989	ENSG00000147044		ENSG00000178988	ENSG00000171522	ENSG00000161204	ENSG00000143924	ENSG00000100441	ENSG00000145495	ENSG00000110063	ENSG00000117143		ENSG00000263244	ENSG00000138593				ENSG00000077150		ENSG00000124160									ENSG00000107362
ENSG00000259248	ENSG00000118707	ENSG00000177410	ENSG00000138071	ENSG00000048405	ENSG00000164951		ENSG00000128789	ENSG00000224578	ENSG00000141867	ENSG00000136504	ENSG00000083168	ENSG00000186480	ENSG00000113810	ENSG00000105963		ENSG00000163599	ENSG00000215417				ENSG00000170525		ENSG00000153207									ENSG00000114796
ENSG00000070047	ENSG00000144535	ENSG00000110651	ENSG00000116459	ENSG00000163874	ENSG00000162852		ENSG00000168610	ENSG00000198189	ENSG00000153922	ENSG00000100410	ENSG00000054267	ENSG00000152818	ENSG00000076003	ENSG00000135900		ENSG00000198783	ENSG00000123358				ENSG00000167258		ENSG00000006634									ENSG00000090432
ENSG00000156030	ENSG00000042429	ENSG00000136888	ENSG00000071127	ENSG00000058600	ENSG00000170525		ENSG00000131100	ENSG00000029363	ENSG00000181523	ENSG00000141646	ENSG00000136271	ENSG00000186918	ENSG00000150687	ENSG00000179454		ENSG00000166685	ENSG00000259248				ENSG00000064687		ENSG00000064932									ENSG00000178951
ENSG00000172071	ENSG00000101216	ENSG00000214736	ENSG00000170043	ENSG00000134744	ENSG00000107937		ENSG00000114125	ENSG00000232388	ENSG00000166579	ENSG00000184436	ENSG00000163659	ENSG00000160796	ENSG00000167173	ENSG00000089692		ENSG00000130734	ENSG00000172071				ENSG00000158987		ENSG00000215251									ENSG00000108179
ENSG00000139505	ENSG00000120889	ENSG00000077984	ENSG00000130175	ENSG00000099821	ENSG00000167258		ENSG00000155096	ENSG00000179094	ENSG00000214367	ENSG00000169499	ENSG00000176915	ENSG00000054118	ENSG00000175040	ENSG00000172059		ENSG00000041802	ENSG00000139505				ENSG00000005007		ENSG00000130810									ENSG00000147138
ENSG00000169895	ENSG00000132510	ENSG00000265401	ENSG00000186010	ENSG00000132017	ENSG00000064687		ENSG00000105856	ENSG00000103035	ENSG00000109929	ENSG00000134186	ENSG00000245532	ENSG00000000419	ENSG00000108798	ENSG00000211650		ENSG00000121671	ENSG00000169895				ENSG00000166233		ENSG00000124383									ENSG00000211639
ENSG00000160179	ENSG00000023287	ENSG00000145649	ENSG00000150459	ENSG00000105127	ENSG00000158987		ENSG00000170476	ENSG00000143977	ENSG00000116731	ENSG00000198160	ENSG00000119950	ENSG00000138398	ENSG00000169896	ENSG00000143751		ENSG00000127804	ENSG00000160179				ENSG00000131242		ENSG00000197183									ENSG00000168092
	ENSG00000136152	ENSG00000078596	ENSG00000165527	ENSG00000046651	ENSG00000005007		ENSG00000171867	ENSG00000125652	ENSG00000100429	ENSG00000112149	ENSG00000100226	ENSG00000101901	ENSG00000121964	ENSG00000124588		ENSG00000070961	ENSG00000205189				ENSG00000075856		ENSG00000102225									ENSG00000137502
	ENSG00000143514	ENSG00000139239	ENSG00000124172	ENSG00000140829	ENSG00000166233		ENSG00000213639	ENSG00000153179	ENSG00000165355	ENSG00000138834	ENSG00000066654	ENSG00000109519	ENSG00000101336	ENSG00000085265		ENSG00000184381					ENSG00000147854		ENSG00000140332									ENSG00000161405
	ENSG00000104671	ENSG00000230903	ENSG00000115415	ENSG00000144136	ENSG00000131242		ENSG00000114861	ENSG00000110367	ENSG00000129933	ENSG00000135968	ENSG00000161835	ENSG00000141298	ENSG00000117143	ENSG00000152700		ENSG00000118707					ENSG00000114439		ENSG00000085978									ENSG00000259261
	ENSG00000129315	ENSG00000100097	ENSG00000173113	ENSG00000164828	ENSG00000075856		ENSG00000140941	ENSG00000095794	ENSG00000108963	ENSG00000114120	ENSG00000165782	ENSG00000164466	ENSG00000105963	ENSG00000124762		ENSG00000144535					ENSG00000102226		ENSG00000177981									ENSG00000223350
	ENSG00000165879	ENSG00000167863	ENSG00000166337	ENSG00000121716	ENSG00000124151		ENSG00000166501	ENSG00000108100	ENSG00000059758	ENSG00000115520	ENSG00000111615	ENSG00000115548	ENSG00000179454	ENSG00000166927		ENSG00000042429					ENSG00000101199		ENSG00000101544									ENSG00000263244
	ENSG00000197860	ENSG00000162191	ENSG00000143420	ENSG00000153207	ENSG00000147854		ENSG00000146425	ENSG00000173039	ENSG00000270075	ENSG00000116604	ENSG00000123728	ENSG00000080371	ENSG00000149577	ENSG00000166133		ENSG00000101216					ENSG00000123066		ENSG00000100207									ENSG00000011007
	ENSG00000116809	ENSG00000172531	ENSG00000100219	ENSG00000160305	ENSG00000114439		ENSG00000131408	ENSG00000130844	ENSG00000254682	ENSG00000146834	ENSG00000163600	ENSG00000158615	ENSG00000110057	ENSG00000088992		ENSG00000120889					ENSG00000182095		ENSG00000119953									ENSG00000136026
	ENSG00000005206	ENSG00000165949	ENSG00000163191	ENSG00000113649	ENSG00000102226		ENSG00000135821	ENSG00000169021	ENSG00000197329	ENSG00000027697	ENSG00000134899	ENSG00000198909	ENSG00000089692	ENSG00000135604		ENSG00000132510					ENSG00000155229		ENSG00000133997									ENSG00000145349
	ENSG00000262456	ENSG00000230202	ENSG00000120129	ENSG00000006634	ENSG00000101199		ENSG00000156639	ENSG00000258424	ENSG00000156232	ENSG00000168137	ENSG00000116717	ENSG00000034677	ENSG00000172059	ENSG00000168496		ENSG00000023287					ENSG00000179981		ENSG00000067596									ENSG00000175197
	ENSG00000140199	ENSG00000146066	ENSG00000211598	ENSG00000064932	ENSG00000123066		ENSG00000119414	ENSG00000112245	ENSG00000100401	ENSG00000167747	ENSG00000149212	ENSG00000165494	ENSG00000211650	ENSG00000263934		ENSG00000080546					ENSG00000144749		ENSG00000083520									ENSG00000198382
	ENSG00000132286	ENSG00000148908	ENSG00000078369	ENSG00000215251	ENSG00000174173		ENSG00000244575	ENSG00000229833	ENSG00000163349	ENSG00000144048	ENSG00000121210	ENSG00000172216	ENSG00000122223	ENSG00000182578		ENSG00000136152					ENSG00000163161		ENSG00000095574									ENSG00000120709
	ENSG00000215252	ENSG00000166136	ENSG00000119801	ENSG00000130810	ENSG00000182095		ENSG00000135916	ENSG00000170881	ENSG00000130935	ENSG00000167470	ENSG00000010322	ENSG00000166128	ENSG00000124588	ENSG00000211942		ENSG00000143514					ENSG00000181555		ENSG00000155304									ENSG00000104312
	ENSG00000163257	ENSG00000147684	ENSG00000127540	ENSG00000236287	ENSG00000144749		ENSG00000103342	ENSG00000119655	ENSG00000130803	ENSG00000105248	ENSG00000177666	ENSG00000056097	ENSG00000085265	ENSG00000172409		ENSG00000104671					ENSG00000169826		ENSG00000158863									ENSG00000150687
	ENSG00000100003	ENSG00000241553	ENSG00000198843	ENSG00000124383	ENSG00000163161		ENSG00000133398	ENSG00000168234	ENSG00000233355	ENSG00000036257	ENSG00000211638	ENSG00000137075	ENSG00000152700	ENSG00000123975		ENSG00000129315					ENSG00000118482		ENSG00000166507									ENSG00000124688
	ENSG00000170322	ENSG00000125835	ENSG00000171490	ENSG00000197183	ENSG00000181555		ENSG00000131669	ENSG00000241755	ENSG00000134480	ENSG00000170759	ENSG00000170852	ENSG00000198089	ENSG00000196735	ENSG00000165806		ENSG00000165879					ENSG00000008710		ENSG00000114742									ENSG00000129315
	ENSG00000202532	ENSG00000244313	ENSG00000142089	ENSG00000132382	ENSG00000169826		ENSG00000205544	ENSG00000100567	ENSG00000104859	ENSG00000213079	ENSG00000106003	ENSG00000079616	ENSG00000124762	ENSG00000109685		ENSG00000116809					ENSG00000116337		ENSG00000178199									ENSG00000169896
	ENSG00000132781	ENSG00000116824	ENSG00000182718	ENSG00000102225	ENSG00000173889		ENSG00000189241	ENSG00000012660	ENSG00000171634	ENSG00000033800	ENSG00000101695	ENSG00000184602	ENSG00000138835	ENSG00000100058		ENSG00000005206					ENSG00000197989		ENSG00000152127									ENSG00000197860
	ENSG00000124789	ENSG00000188612	ENSG00000213178	ENSG00000085978	ENSG00000118482		ENSG00000063978	ENSG00000115687	ENSG00000119707	ENSG00000079313	ENSG00000163811	ENSG00000258352	ENSG00000166927	ENSG00000100292		ENSG00000262456					ENSG00000161638		ENSG00000109270									ENSG00000135900
	ENSG00000102606	ENSG00000211949	ENSG00000026297	ENSG00000177981	ENSG00000008710		ENSG00000144655	ENSG00000074842	ENSG00000100888	ENSG00000168264	ENSG00000174738	ENSG00000164463	ENSG00000088992	ENSG00000165030		ENSG00000140199					ENSG00000053918		ENSG00000120733									ENSG00000179454
	ENSG00000179119	ENSG00000138071	ENSG00000067167	ENSG00000101544	ENSG00000197989		ENSG00000122085	ENSG00000157540	ENSG00000070495	ENSG00000198874	ENSG00000069667	ENSG00000170340	ENSG00000135604	ENSG00000135074		ENSG00000215252					ENSG00000132153		ENSG00000065526									ENSG00000151292
	ENSG00000100416	ENSG00000116459	ENSG00000173915	ENSG00000100207	ENSG00000181788		ENSG00000005075	ENSG00000184588	ENSG00000142599	ENSG00000174953	ENSG00000105726	ENSG00000257242	ENSG00000168496	ENSG00000253998		ENSG00000163257					ENSG00000163874		ENSG00000101146									ENSG00000166266
[truncated: 2,263 more rows]

## Sheet: Genes_UP_mRNA
These are, for each CUFFDIFF comparison, the list of genes with >1.5x increased (UP) mRNA expression, the count for which is the last number in the headers.
					REFINED COMPARISON
[truncated: 1,855 more rows]
